# Supplementary material for: Green chemical approach: microwave assisted, titanium dioxide nanoparticles catalyzed, convenient and efficient C–C bond formation in the synthesis of highly functionalized quinolines and quinolinones
Source: Royal Society of Chemistry journal article supplement (doi:10.1039/c4ra06772j), 2014-01-01

## Green Chemical Approach: Microwave assisted, titanium dioxide nanoparticles catalyzed, convenient and efficient C-C bond formation in the synthesis of highly functionalized quinolines and quinolinones

Shaik Mohammed Ghouse<sup>a\*</sup>, Yadavalli Suneel Kumar<sup>a\*</sup>, Jong Sung Jin<sup>b</sup>, Jong-Pil Kim<sup>b</sup>, Jong Seong Bae<sup>b</sup>, Eun Hyuk Chung<sup>b</sup>, Do Yeon Kim<sup>b</sup>, Eun Kyung Jang<sup>b</sup>, Fazlur-Rahman Nawaz Khan<sup>a\*,b\*</sup> Euh Duck Jeong<sup>b\*</sup>

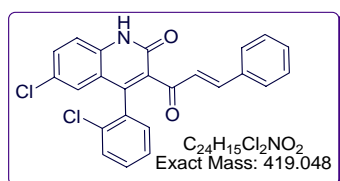

White solid, m.p 222 – 224 °C, <sup>1</sup>H NMR (400 MHz, CDCl<sub>3</sub>) δ 12.75 (s, 1H), 7.54 - 7.50 (d, *J* = 16.4 Hz, 1H), 7.48 - 7.43 (m, 3H), 7.42 - 7.42 (m, 2H), 7.39 - 7.33 (m, 5H), 7.31 - 7.29 (dd, *J* = 6.7, 2.8 Hz, 1H), 7.02 (s, 1H), 6.83 - 6.79 (d, *J* = 16.0 Hz, 1H); <sup>13</sup>C NMR (100 MHz, CDCl<sub>3</sub>) δ 192.7, 161.5, 146.7, 146.1, 136.4, 134.1, 132.4, 132.4, 132.2, 131.7, 131.3, 130.6, 130.6, 129.7, 128.7, 128.6, 128.4, 127.0, 126.5, 126.0, 119.9, 117.9; IR (ν, cm<sup>-1</sup>) 3152 (-N-H), 2999, 2907, 2860, 2829, 1665, 1639, 1605, 1485, 1406, 1367, 1242, 1202, 1178, 1068, 978, 951, 885, 827, 759, 738, 712, 596, 561; UPLC - MS: m/e 420.18 [M<sup>+</sup>], C<sub>24</sub>H<sub>15</sub>Cl<sub>2</sub>NO<sub>2</sub> required Mol.Wt.: 419.05.

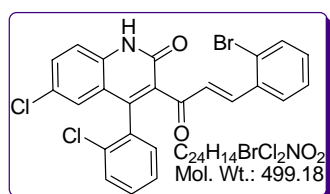

White solid, m.p 218 – 220 °C, <sup>1</sup>H NMR (400 MHz, CDCl<sub>3</sub>) δ 12.19 (s, 1H), 7.879 - 7.84 (d, *J* = 16.0 Hz, 1H), 7.59 - 7.58 (d, *J* = 7.6 Hz, 1H), 7.56 - 7.54 (d, *J* = 8.0 Hz, 1H), 7.47 - 7.46 (d, *J* = 7.2 Hz, 1H), 7.43 - 7.38 (m, 2H), 7.35 - 7.29 (m, 4H), 7.24 - 7.20 (t, *J* = 7.6 Hz, 1H), 7.01 (s, 1H), 6.83 - 6.79 (d, *J* = 16.0 Hz, 1H); <sup>13</sup>C NMR (100 MHz, CDCl<sub>3</sub>) δ 192.5, 161.9, 147.6, 143.9, 136.8, 134.2, 133.6, 132.7, 132.4, 132.3, 131.9, 131.7, 131.3, 130.8, 129.9, 128.9, 128.8, 127.9, 127.7, 127.1, 126.2, 120.3, 118.3; IR (ν, cm<sup>-1</sup>) 3143, 3063, 3024, 2989, 2901, 2864, 2833, 2737, 1688, 1649, 1601, 1553, 1483, 1466, 1435, 1406, 1369, 1340, 1263, 1173, 1088, 1057, 1024, 978, 912, 829, 758, 744, 569; UPLC - MS: m/e 500.07 [M<sup>+</sup>], C<sub>24</sub>H<sub>14</sub>BrCl<sub>2</sub>NO<sub>2</sub> required Mol.Wt.:499.18.

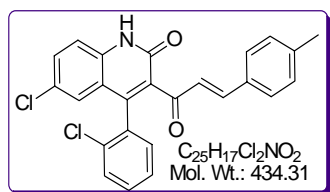

White solid, m.p 280 – 282 °C, <sup>1</sup>H NMR (400 MHz, CDCl<sub>3</sub>) δ 12.19 (s, 1H), 7.51 - 7.47 (d, *J* = 16.4, 1H), 7.44 - 7.39 (m, 3H), 7.37 - 7.33 (m, 4H), 7.31 - 7.29 (d, *J* = 6.4 Hz, 1H), 7.17 - 7.15 (m, 2H), 7.02 (s, 1H), 6.77 - 6.73 (d, *J* = 16.4 Hz, 1H), 2.36 (s, 3H); <sup>13</sup>C NMR (100 MHz, CDCl<sub>3</sub>) 192.9, 161.8, 146.6, 146.5, 141.4, 136.4, 132.5, 132.5, 132.2, 131.6, 131.3, 131.3, 130.5, 129.7, 129.5, 128.5, 127.1, 125.9, 125.7, 119.9, 118.2, 21.4.; IR (ν, cm<sup>-1</sup>) 3144, 3076, 3021, 2986, 2903, 2862, 2829, 2787, 2733, 1682, 1643, 1595, 1560, 1433, 1408, 1367, 1180, 1030, 989, 914, 746, 559.; UPLC - MS: m/e 434.20, C<sub>25</sub>H<sub>17</sub>Cl<sub>2</sub>NO<sub>2</sub> required Mol.Wt.: 434.31

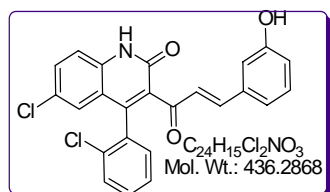

White solid, m.p 170 – 172 °C, <sup>1</sup>H NMR (400 MHz, CDCl<sub>3</sub>) δ 12.15 (s, 1H), 7.70 - 7.66 (d, *J* = 15.6 Hz, 1H), 7.47 - 7.43 (m, 4H), 7.15 - 7.12 (m, 2H), 6.95 - 6.90 (m, 3H), 6.84 - 6.79 (m, 3H); <sup>13</sup>C NMR (100 MHz, DMSO-d<sub>6</sub>) δ 193.2, 159.5, 157.5, 146.5, 144.6, 137.1, 135.1, 132.9, 131.9, 131.4, 131.2, 131.1, 130.2, 129.5, 127.5, 126.7, 126.5, 124.9, 120.0, 119.4, 118.3,

117.9, 114.6; IR ( $\nu$ ,  $\text{cm}^{-1}$ ) 3173, 3063, 2907, 2866, 2833, 2733, 1680, 1639, 1603, 1585, 1485, 1469, 1447, 1404, 1369, 1281, 1254, 1219, 1177, 1089, 1070, 1057, 1024, 982, 877, 822, 783, 766, 744, 714. UPLC - MS:  $m/e$  436.23,  $\text{C}_{24}\text{H}_{15}\text{Cl}_2\text{NO}_3$  required Mol.Wt. : 436.29.

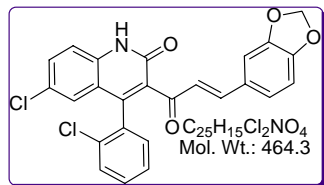

White solid, m.p 238 – 240 °C,  $^1\text{H}$  NMR (400 MHz, DMSO- $\text{D}_6$ )  $\delta$  12.37 (s, 1H), 7.64 - 7.62(d,  $J$  = 8.8 Hz, 1H), 7.56 - 7.54 (d,  $J$  = 8.0 Hz, 1H), 7.49 - 7.45 (m, 2H), 7.42 - 7.36 (m, 2H), 7.31 - 7.29 (d,  $J$  = 7.2 Hz, 1H), 7.25 (s, 1H), 7.14 - 7.12 (d,  $J$  = 8.0 Hz, 1H), 6.92 - 6.89 (d,  $J$  = 8.0 Hz, 1H), 6.76 (s, 1H), 6.64 - 6.60 (d,  $J$  = 16.0 Hz, 1H), 6.03 (s, 2H);  $^{13}\text{C}$  NMR (100 MHz, DMSO- $\text{d}_6$ )  $\delta$  193.1, 159.5, 149.9, 148.0, 146.6, 144.4, 137.1, 133.1, 131.9, 131.3, 131.1, 131.1, 129.5, 128.2, 127.4, 126.6, 125.8, 124.9, 119.4, 117.9, 108.6, 106.8, 101.7; IR ( $\nu$ ,  $\text{cm}^{-1}$ ) 3149, 3076, 3049, 3017, 2916, 2868, 1666, 1651, 1637, 1599, 1502, 1485, 1467, 1406, 1364, 1265, 1259, 1231, 1175, 1072, 1042, 968, 933, 837, 814, 743, 552, LC - MS:  $m/e$  464.16,  $\text{C}_{25}\text{H}_{15}\text{Cl}_2\text{NO}_4$  required Mol.Wt.:464.3.

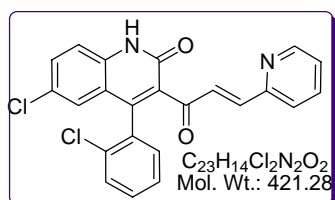

White solid, m.p 236 - 238 °C,  $^1\text{H}$  NMR (400 MHz,  $\text{CDCl}_3$ )  $\delta$  12.75 (s, 1H), 8.63 - 8.62 (d,  $J$  = 4.4 Hz, 1H), 7.71 - 7.67 (dt,  $J$  = 7.64, 1.6 Hz, 1H), 7.53 - 7.49 (d,  $J$  = 16.0 Hz, 1H), 7.46 - 7.42, (m, 2H), 7.40 - 7.34 (m, 5H), 7.31 - 7.27 (m, 2H), 7.01 (s, 2H);  $^{13}\text{C}$  NMR (100 MHz, DMSO- $\text{d}_6$ )  $\delta$  192.9, 161.9, 152.9, 150.2, 147.4, 144.3, 136.8, 136.7, 132.7, 132.4, 132.3, 131.9, 131.4, 130.7, 130.1, 129.9, 128.7, 127.2, 126.2, 124.8, 124.5, 120.2, 118.4; IR ( $\nu$ ,  $\text{cm}^{-1}$ ), 3149, 3071, 2997, 2909, 2870, 2841, 1666, 1634, 1616, 1603, 1578, 1564, 1487, 1469, 1429, 1408, 1371, 1283, 1244, 1089, 1061, 1049, 987, 837, 768, 743, 604, 563, UPLC -MS:  $m/e$  421.16,  $\text{C}_{23}\text{H}_{14}\text{Cl}_2\text{N}_2\text{O}_2$  required Mol.Wt.:421.28.

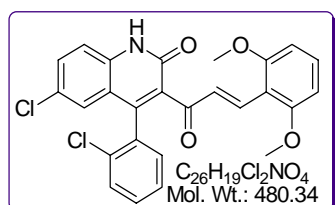

White solid, m.p 224 – 226 °C,  $^1\text{H}$  NMR (400 MHz,  $\text{CDCl}_3$ )  $\delta$  12.37 (s, 1H), 7.83 - 7.78 (d,  $J$  = 16.4 Hz, 4H), 7.45 - 7.43 (d,  $J$  = 7.60 Hz, 1H), 7.39 - 7.35 (m, 4H), 7.33 - 7.29 (t,  $J$  = 6.8 Hz, 1H), 7.01 - 6.99 (m, 2H), 6.93 - 6.85 (m, 2H), 6.79 - 6.77 (d,  $J$  = 9.2 Hz, 1H), 3.75 (s, 3H), 3.71 (s, 3H);  $^{13}\text{C}$  NMR (100 MHz,  $\text{CDCl}_3$ )  $\delta$  193.4, 161.9, 153.5, 153.4, 146.8, 141.7, 136.7, 133.1, 132.9, 132.6, 131.8, 131.6, 130.8, 129.9, 128.8, 127.3, 126.3, 123.8, 120.4, 118.3, 113.2, 56.0, 55.9; IR ( $\nu$ ,  $\text{cm}^{-1}$ ) 3146, 3001, 2907, 2862, 2833, 1639, 1493, 1468, 1404, 1366, 1236, 1178, 1074, 1047, 986, 961, 822, 752, 716, 609, 559; UPLC-MS:  $m/e$  480.28,  $\text{C}_{26}\text{H}_{19}\text{Cl}_2\text{NO}_4$  required Mol. Wt.: 480.34.

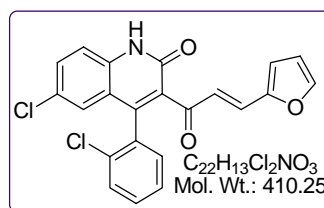

White solid, m.p 248 – 250 °C,  $^1\text{H}$  NMR (400 MHz,  $\text{CDCl}_3$ )  $\delta$  12.99(s, 1H), 7.74 - 7.69 (m, 2H), 7.68 (s, 2H), 7.65 - 7.59 (m, 2H), 7.54 - 7.49 (m, 3H), 6.98 - 6.94 (d,  $J$  = 16.0 Hz, 1H), 6.88 - 6.88 (d,  $J$  = 2.4 Hz, 1H), 6.72 (s, 3H);  $^{13}\text{C}$  NMR (100 MHz,  $\text{CDCl}_3$ )  $\delta$  192.4, 161.9, 151.0, 147.2, 145.6, 136.8, 132.8, 132.6, 132.6, 132.1, 131.9, 131.5, 130.8, 130.0, 128.9, 127.3, 126.3, 124.3, 120.4, 118.4, 116.9, 112.9; IR ( $\nu$ ,  $\text{cm}^{-1}$ ) 3155, 3007, 2920, 1672, 1605, 1560, 1468, 1402, 1391, 1367, 1277, 1242, 1134, 1088, 1055, 1018, 883, 835, 744, 557; UPLC - MS:  $m/e$  410.12,  $\text{C}_{22}\text{H}_{13}\text{Cl}_2\text{NO}_3$  required Mol. Wt.: 410.25

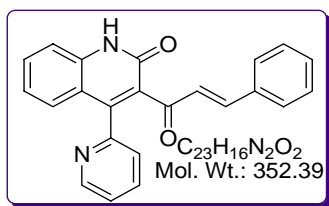

White solid, m.p 240 – 242 °C,  $^1\text{H}$  NMR (400 MHz,  $\text{CDCl}_3$ )  $\delta$  12.22 (s, 1H), 8.68 – 8.67 (d,  $J = 4.27$  Hz, 1H), 7.80 - 7.76 (td,  $J = 7.77$ , 2.0 Hz, 1H), 7.50 - 7.44 (m, 6H), 7.34 - 7.29 (m, 5H), 7.17 - 7.14 (t,  $J = 8.0$  Hz, 1H), 6.89 - 6.85 (d,  $J = 16.0$  Hz, 1H);  $^{13}\text{C}$  NMR (100 MHz,  $\text{CDCl}_3$ )  $\delta$  192.8, 161.0, 152.9, 148.9,

147.9, 145.1, 137.9, 135.8, 133.7, 130.8, 130.2, 129.8, 127.9, 127.8, 126.5, 126.4, 124.6, 122.7, 122.4, 118.3, 115.9; IR ( $\nu$ ,  $\text{cm}^{-1}$ ) 3148, 3096, 2989, 2943, 2879, 2843, 1678, 1641, 1618, 1584, 1479, 1431, 1402, 1375, 1242, 1193, 1078, 1049, 993, 972, 768, 750, 716, 663, 569; UPLC - MS: m/e 353.26,  $\text{C}_{23}\text{H}_{16}\text{N}_2\text{O}_2$  required Mol. Wt.: 352.38

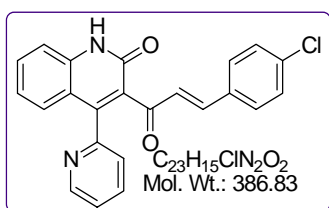

White solid, m.p 246 - 248 °C,  $^1\text{H}$  NMR (400 MHz,  $\text{CDCl}_3$ )  $\delta$  12.77 (s, 1H), 8.67 - 8.66 (d,  $J = 4.8$  Hz, 1H), 7.81 - 7.77 (dt,  $J = 7.69$ , 1.2 Hz, 1H), 7.47 - 7.45 (m, 3H), 7.42 - 7.38 (m, 3H), 7.33 - 7.28 (m, 4H), 7.17 - 7.13 (td,  $J = 8.3$ , 3.2 Hz, 1H), 6.83 - 6.87 (d,  $J = 16.00$  Hz, 1H);  $^{13}\text{C}$  NMR (100 MHz,  $\text{CDCl}_3$ )  $\delta$  193.2, 161.8, 153.6, 149.6, 148.8, 143.9, 138.6, 136.5, 136.4, 2845.0, 132.8, 131.5, 130.7, 129.5, 128.9, 127.4, 127.1, 125.3, 123.4,

123.1, 118.9, 116.6, 77.2, 76.5; IR ( $\nu$ ,  $\text{cm}^{-1}$ ) 3149, 3098, 3046, 2997, 2966, 2943, 2883, 1651, 1643, 1585, 1568, 1549, 1501, 1483, 1431, 1402, 1377, 1298, 1244, 1192, 1076, 993, 964, 912, 877, 822, 779, 752, 779, 669, 588; UPLC- MS: m/e 387.24,  $\text{C}_{23}\text{H}_{15}\text{ClN}_2\text{O}_2$  required Mol. Wt.: 386.83

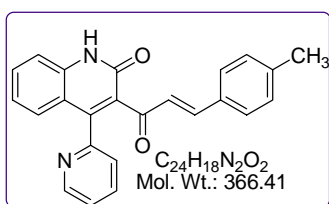

White solid, m.p 248 - 250 °C,  $^1\text{H}$  NMR (400 MHz,  $\text{CDCl}_3$ )  $\delta$  12.604 (s, 1H), 8.67 - 8.66 (d,  $J = 4.8$  Hz, 1H), 7.79 - 7.75 (dt,  $J = 7.72$ , 1.6 Hz), 7.48 - 7.42 (m, 4H), 7.37 - 7.35 (d,  $J = 8.0$  Hz, 2H), 7.31 - 7.28 (m, 2H), 7.18 - 7.12 (m, 3H), 6.83 - 6.79 (d,  $J = 16$  Hz, 1H), 2.34 (s, 3H);  $^{13}\text{C}$  NMR (100 MHz,  $\text{CDCl}_3$ )  $\delta$  193.4, 161.5, 153.5, 149.4, 148.2, 145.9, 140.8, 138.4, 136.3, 131.4, 131.2, 130.8, 129.2, 128.3, 126.9, 125.9, 125.1, 123.1, 122.8,

118.7, 21.2, 116.4; IR ( $\nu$ ,  $\text{cm}^{-1}$ ) 3167, 3051, 3028, 2974, 2895, 2853, 1678, 1659, 1601, 1566, 1468, 1402, 1379, 1325, 1182, 1061, 993, 949, 856, 787, 752, 685, 609, 523; UPLC - MS : m/e 367.37,  $\text{C}_{24}\text{H}_{18}\text{N}_2\text{O}_2$  required Mol. Wt.: 366.41.

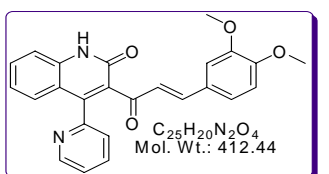

White solid, m.p 228 - 230 °C,  $^1\text{H}$  NMR (400 MHz,  $\text{CDCl}_3$ )  $\delta$  12.48 (s, 1H), 8.68 - 8.67 (d,  $J = 4.8$  Hz, 1H), 7.81 - 7.76 (td,  $J = 7.77$ , 1.6 Hz, 1H), 7.49 - 7.47 (m, 3H), 7.42 - 7.38 (d,  $J = 16.4$  Hz, 1H), 7.33 - 7.28 (m, 2H), 7.17 - 7.13 (dt,  $J = 8.15$ , 2.4 Hz, 1H), 7.07 - 7.05 (dd,  $J = 8.33$ , 1.6 Hz, 1H), 6.98 - 6.97 (d,  $J = 1.6$  Hz, 1H), 6.82 - 6.79 (d,  $J = 8.4$  Hz, 1H), 6.75 - 6.71 (d,  $J = 16.0$  Hz, 1H),

3.89 (s, 3H), 3.84 (s, 3H);  $^{13}\text{C}$  NMR (100 MHz,  $\text{CDCl}_3$ )  $\delta$  193.6, 161.8, 153.8, 151.5, 149.7, 149.1, 148.3, 146.4, 138.7, 136.7, 131.5, 131.3, 127.3, 125.6, 125.3, 123.5, 123.4, 123.2, 119.1, 116.7, 110.9, 110.1, 55.9, 55.9; IR ( $\nu$ ,  $\text{cm}^{-1}$ ) 3157, 3042, 3001, 2957, 2938, 2843, 2760, 1663, 1643, 1616, 1595, 1584, 1510, 1468, 1425, 1402, 1379, 1273, 1240, 1074, 1024, 974, 818, 781, 675, 561; UPLC - MS : m/e 413.26.,  $\text{C}_{25}\text{H}_{20}\text{N}_2\text{O}_4$  required Mol. Wt.: 412.44.

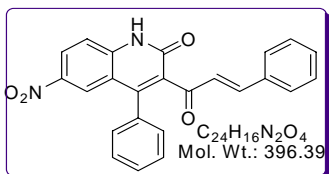

White solid, m.p 240 - 242 °C,  $^1\text{H}$  NMR (400 MHz,  $\text{CDCl}_3$ )  $\delta$  8.29 - 8.27 (dd,  $J = 8.90$ , 2.0 Hz, 1H), 8.25 - 8.24 (d,  $J = 2.4$  Hz, 1H), 7.59 - 7.57 (d,  $J = 9.2$  Hz, 1H), 7.47 - 7.46 (m, 3H), 7.42 -

7.39 (m, 3H), 7.37 - 7.36 (m, 2H), 7.34 - 7.31 (m, 3H), 6.70 - 6.74 (d,  $J = 16.4$  Hz, 1H);  $^{13}\text{C}$  NMR (100 MHz,  $\text{CDCl}_3$ )  $\delta$  191.7, 161.1, 149.2, 145.3, 142.2, 141.2, 132.9, 131.7, 130.1, 128.9, 128.0, 127.9, 127.5, 125.8, 124.9, 123.0, 118.6, 116.7; IR ( $\nu$ ,  $\text{cm}^{-1}$ ) 3244, 3028, 2932, 2882, 1661, 1626, 1574, 1532, 1485, 1402, 1337, 1063, 979, 912, 829, 716, 559; UPLC - MS:  $m/e$  397.32,  $\text{C}_{24}\text{H}_{16}\text{N}_2\text{O}_4$  required Mol. Wt.: 396.40.

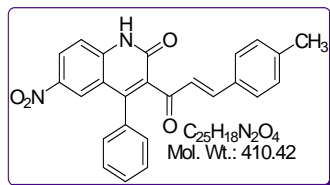

White solid, m.p 260 – 262 °C,  $^1\text{H}$  NMR (400 MHz,  $\text{CDCl}_3$ )  $\delta$  8.30 - 8.25 (dd,  $J = 8.95$ , 2.4 Hz, 1H), 8.26 - 8.25 (d,  $J = 2.0$  Hz, 1H), 7.58 - 7.56 (d,  $J = 9.2$  Hz, 1H), 7.48 - 7.46 (m, 3H), 7.38 - 7.32 (m, 5H), 7.17 - 7.15 (d,  $J = 8.0$  Hz, 2H), 6.72 - 6.68 (d,  $J = 16.0$  Hz, 1H), 2.37 (s, 3H);  $^{13}\text{C}$  NMR (100 MHz,  $\text{CDCl}_3$ )  $\delta$  192.7, 162.1, 150.2, 146.7, 143.3, 142.2, 141.9, 132.9, 132.8, 131.4, 129.9, 129.8, 129.1, 129.1, 128.6, 126.1, 125.9, 124.2, 119.7, 117.6, 21.6; IR ( $\nu$ ,  $\text{cm}^{-1}$ ) 3167, 3121, 3059, 2993, 2924, 2879, 1684, 1663, 1614, 1529, 1484, 1443, 1402, 1333, 1240, 1178, 1139, 1061, 979, 810, 764; UPLC - MS :  $m/e$  411.25,  $\text{C}_{25}\text{H}_{18}\text{N}_2\text{O}_4$  required Mol. Wt.: 410.42

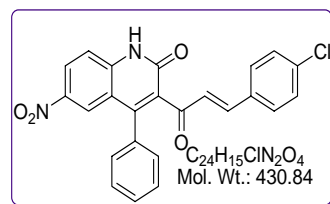

White solid, m.p 255 – 257 °C,  $^1\text{H}$  NMR (400 MHz,  $\text{CDCl}_3$ )  $\delta$  12.85 (s, 1H), 8.37 - 8.34 (dd,  $J = 9.05$ , 2.4 Hz, 1H), 8.28 - 8.28 (d,  $J = 2.4$  Hz, 1H), 7.59 - 7.57 (d,  $J = 8.8$  Hz, 1H), 7.49 - 7.49 (m, 3H), 7.37 - 7.32 (m, 7H), 6.71 - 6.67 (d,  $J = 16.4$  Hz, 1H);  $^{13}\text{C}$  NMR (100 MHz,  $\text{CDCl}_3$ ) 192.3, 161.9, 150.4, 144.6, 143.3, 142.1, 137.2, 132.6, 132.6, 132.5, 129.9, 129.6, 129.3, 129.1, 128.9, 126.1, 124.1, 119.6, 117.6; IR ( $\nu$ ,  $\text{cm}^{-1}$ ) 3171, 3126, 3067, 2993, 2929, 2884, 1686, 1665, 1620, 1529, 1489, 1404, 1335, 1240, 1204, 1175, 1139, 1092, 1061, 1017, 979, 914, 833, 764, 708, 563, 525; UPLC - MS:  $m/e$  431.19,  $\text{C}_{24}\text{H}_{15}\text{ClN}_2\text{O}_4$  required Mol. Wt.: 430.84.

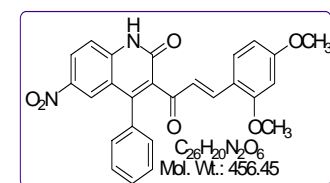

White solid, m.p 224 – 226 °C,  $^1\text{H}$  NMR (400 MHz,  $\text{CDCl}_3$ )  $\delta$  8.25 - 8.22 (m, 2H), 7.66 - 7.62 (d,  $J = 16.4$  Hz, 1H), 7.61 - 7.59 (d,  $J = 8.8$  Hz, 1H), 7.45 - 7.44 (m, 3H), 7.35 - 7.32 (m, 3H), 6.72 - 6.68 (d,  $J = 16.0$  Hz, 1H), 6.47 - 6.44 (dd,  $J = 8.64$  Hz, 2.0 Hz, 1H), 6.37 - 6.37 (d,  $J = 1.6$  Hz, 1H), 3.82 (s, 3H), 3.77 (s, 3H);  $^{13}\text{C}$  NMR (100 MHz,  $\text{CDCl}_3$ )  $\delta$  193.3, 163.7, 162.1, 160.1, 149.6, 143.1, 142.4, 142.2, 133.1, 132.9, 130.5, 129.6, 129.1, 128.9, 125.7, 124.9, 123.9, 119.7, 117.8, 116.1, 105.6, 98.3, 55.5, 55.5; IR ( $\nu$ ,  $\text{cm}^{-1}$ ) 3211, 3175, 3001, 2943, 2879, 2841, 1651, 1589, 1537, 1504, 1468, 1402, 1339, 1275, 1209, 1180, 1107, 1059, 1020, 966, 879, 827, 759, 712, 586; UPLC - MS:  $m/e$  457.33,  $\text{C}_{26}\text{H}_{20}\text{N}_2\text{O}_6$  required Mol. Wt.: 456.45.

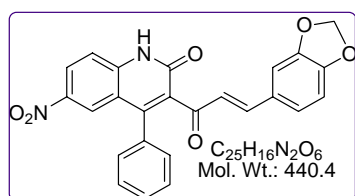

White solid, M.P-278 – 280 °C,  $^1\text{H}$ -NMR (400 MHz,  $\text{CDCl}_3$ ):  $\delta$  12.68(s, 1H), 8.30 – 8.28 (d,  $J = 7.56$ Hz, 1H), 8.24 – 8.23 (d,  $J = 4.96$  Hz, 1H), 7.55 – 7.53 (d, 8.8 Hz, 1H), 7.46 – 7.43 (m, 3H), 7.32 – 7.30 (m, 3H), 6.91 – 6.88 (m, 2H), 6.76 – 6.74 (d,  $J = 8.47$  Hz, 1H), 6.57 – 6.53 (d,  $J = 16.38$  Hz, 1H), 5.99 (s, 2H);  $^{13}\text{C}$ NMR (100 MHz,  $\text{CDCl}_3$ ), 192.3, 161.9, 150.5, 150.1, 148.5, 146.2, 143.2, 142.1, 132.9, 132.7, 129.8, 129.0, 128.9, 128.4, 126.0, 125.5, 124.9, 124.1, 119.6, 117.5, 108.7, 106.6, 101.8; IR ( $\nu$ ,  $\text{cm}^{-1}$ ) 3163, 2932, 2783, 2735, 1659, 1639, 1620, 1599, 1533, 1489, 1448, 1402, 1359, 1337, 1257, 1230, 1138, 1099, 1065, 1038, 984, 929, 912, 833, 810, 764, 750, 702, UPLC - MS:  $m/e$  441.20,  $\text{C}_{25}\text{H}_{16}\text{N}_2\text{O}_6$  required Mol. Wt.: 440.40.

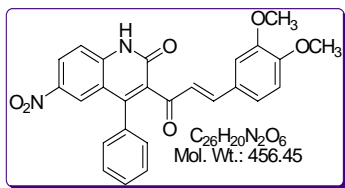

White solid, m.p 252 – 254 °C,  $^1\text{H}$  NMR (400 MHz,  $\text{CDCl}_3$ )  $\delta$  8.30 - 8.28 (d,  $J = 9.2$  Hz, 1H), 8.25 - 8.25 (d,  $J = 2.0$  Hz, 1H), 7.59 - 7.58 (d,  $J = 8.8$  Hz, 1H), 7.47 - 7.46 (m, 3H), 7.33 - 7.29 (m, 3H), 7.02 - 7.00 (d,  $J = 8.0$  Hz, 1H), 6.39 (s, 1H), 6.83 - 6.81 (d,  $J = 8.4$  Hz, 1H), 6.64 - 6.59 (d,  $J = 16.0$  Hz, 1H), 3.89 (s, 3H), 3.86 (s, 3H);  $^{13}\text{C}$  NMR (100 MHz,  $\text{CDCl}_3$ )  $\delta$  192.5, 162.1, 152.0, 150.1, 149.3, 146.8, 143.2, 142.1, 132.9, 132.8, 129.8, 129.0, 129.0, 126.9, 125.9, 124.9, 124.1, 123.6, 119.7, 117.7, 111.1, 109.9, 56.0, 55.9; IR ( $\nu$ ,  $\text{cm}^{-1}$ ) 3177, 3082, 2934, 2837, 1653, 1620, 1597, 1512, 1487, 1487, 1464, 1443, 1334, 1265, 1238, 1139, 1063, 1022, 843, 766, 702.1, 561; UPLC - MS: m/e 457.30,  $\text{C}_{26}\text{H}_{20}\text{N}_2\text{O}_6$  required Mol. Wt.: 456.45.

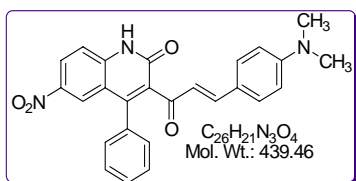

White solid, m.p 250 – 252 °C,  $^1\text{H}$  NMR (400 MHz,  $\text{CDCl}_3$ )  $\delta$  12.85 (s, 1H), 8.19 – 8.17 (m, 2H), 7.57 – 7.55 (d,  $J = 8.32$  Hz, 1H), 7.42 – 7.39 (m, 3H), 7.31 – 7.27 (m, 5H), 6.60 – 6.52 (m, 3H), 3.01 (s, 6H);  $^{13}\text{C}$  NMR (100 MHz,  $\text{CDCl}_3$ )  $\delta$  191.5, 151.3, 146.9, 142.0, 141.1, 132.0, 129.6, 128.5, 127.9, 127.8, 124.6, 122.8, 121.0, 120.6, 118.7, 116.8, 110.7, 39.1; IR ( $\nu$ ,  $\text{cm}^{-1}$ ) 3153, 2993, 2924, 2858, 2822, 1659, 1589, 1528, 1487, 1435, 1400, 1373, 1337, 1267, 1242, 1169, 1061, 1029, 982, 945, 912, 831, 704, 559; UPLC-MS: m/e 440.25  $\text{C}_{26}\text{H}_{21}\text{N}_3\text{O}_4$  required Mol. Wt.: 439.46.

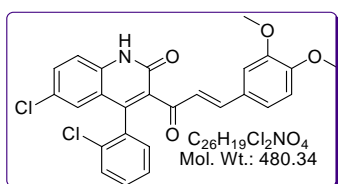

White solid, m.p 214 – 216 °C,  $^1\text{H}$  NMR (400 MHz,  $\text{CDCl}_3$ )  $\delta$  12.91 (s, 1H), 12.91 (s, 1H), 7.48 - 7.46 (d,  $J = 7.2$  Hz, 1H), 7.44 - 7.38 (m, 3H), 7.36 - 7.33 (dd,  $J = 4.34, 2.80$  Hz, 1H), 7.31 - 7.30 (t,  $J = 1.6$  Hz, 1H), 7.29 - 7.29 (d,  $J = 2.4$  Hz, 1H), 7.06 - 7.03 (dd,  $J = 8.33, 2.0$  Hz, 1H), 7.02 - 7.01 (d,  $J = 2.0$  Hz, 1H), 6.98 - 6.98 (d,  $J = 1.6$  Hz, 1H), 6.83 - 6.81 (d,  $J = 8.4$  Hz, 1H), 6.69 - 6.65 (d,  $J = 16.0$  Hz, 1H), 3.89 (s, 3H), 3.86 (s, 3H);  $^{13}\text{C}$  NMR (100 MHz,  $\text{CDCl}_3$ )  $\delta$  192.8, 161.7, 151.6, 149.1, 146.7, 146.5, 136.5, 132.7, 132.5, 132.3, 131.6, 131.4, 130.6, 129.8, 128.6, 127.2, 127.0, 125.9, 124.7, 123.5, 120.0, 118.2, 110.9, 109.9, 55.9, 55.7; IR ( $\nu$ ,  $\text{cm}^{-1}$ ) 3155, 3003, 2932, 2911, 2868, 2835, 1659, 1639, 1595, 1510, 1462, 1439, 1406, 1367, 1342, 1267, 1244, 1161, 1139, 1074, 1024, 978, 951, 881, 827, 748, 714, 671, 636; UPLC - MS : m/e 480.28,  $\text{C}_{26}\text{H}_{19}\text{Cl}_2\text{NO}_4$  required Mol.Wt.: 480.34.

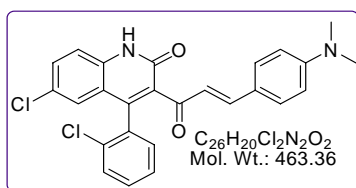

White solid, m.p 298 – 300 °C,  $^1\text{H}$  NMR (400 MHz,  $\text{CDCl}_3$ )  $\delta$  12.40 (s, 1H), 7.46 - 7.42 (d,  $J = 16.0$  Hz, 1H), 7.41 - 7.39 (m, 3H), 7.36 - 7.30 (m, 5H), 7.01 - 7.00 (t,  $J = 1.2$  Hz, 1H), 6.62 - 6.62 (d,  $J = 1.6$  Hz, 1H), 6.59 - 6.56 (d,  $J = 16.0$  Hz, 2H), 3.02 (s, 6H);  $^{13}\text{C}$  NMR (100 MHz,  $\text{CDCl}_3$ ) 191.6, 160.7, 151.2, 146.9, 145.0, 135.4, 131.7, 131.6, 130.5, 130.5, 129.7, 129.5, 128.8, 127.5, 126.1, 125.0, 120.9, 119.2, 117.1, 110.6, 39.1; IR ( $\nu$ ,  $\text{cm}^{-1}$ ) 3148, 3084, 3005, 2993, 2907, 2862, 2826, 1651, 1593, 1553, 1526, 1485, 1435, 1406, 1366, 1341, 1263, 1240, 1132, 1186, 1171, 1072, 1053, 982, 945, 816, 750, 599, 555; UPLC - MS : m/e 463.27,  $\text{C}_{26}\text{H}_{20}\text{Cl}_2\text{N}_2\text{O}_2$  required Mol. Wt.: 463.36.

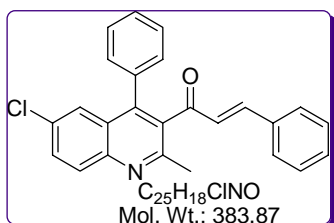

Light yellow solid, m.p 160 - 162 °C,  $^1\text{H}$  NMR (400 MHz,  $\text{CDCl}_3$ )  $\delta$  8.08 - 8.05 (d,  $J = 9.2$  Hz, 1H), 7.70 - 7.68 (d,  $J = 9.2$  Hz, 1H), 7.59 (s, 1H), 7.43 - 7.35 (m, 4H), 7.33 - 7.26 (m, 6H),

7.12 - 7.08 (d,  $J = 16.0$  Hz, 1H), 6.61 - 6.57 (d,  $J = 16.4$  Hz, 1H), 2.70 (s, 3H);  $^{13}\text{C}$  NMR (100 MHz,  $\text{CDCl}_3$ )  $\delta$  197.5, 155.6, 147.2, 146.4, 144.8, 134.8, 134.2, 133.6, 132.7, 131.3, 131.3, 130.8, 130.2, 129.2, 129.2, 128.8, 128.6, 127.8, 126.4, 125.3, 24.2; IR ( $\nu$ ,  $\text{cm}^{-1}$ ) 1641, 1599, 1564, 1481, 1436, 1386, 1311, 1224, 1201, 1161, 1082, 1047, 972, 881, 831, 765, 711, 702, 684, 663, 646.15, 588.; LC – MS : m/e 384.57,  $\text{C}_{25}\text{H}_{18}\text{ClNO}$  required Mol. Wt.: 383.87

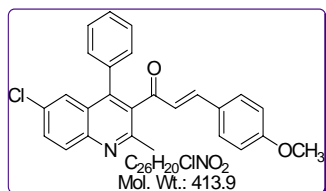

White solid, m.p 160 – 164 °C,  $^1\text{H}$  NMR (400 MHz,  $\text{CDCl}_3$ )  $\delta$  8.07 - 8.05 (d,  $J = 7.07$  Hz, 1H), 7.69 - 7.67 (d,  $J = 7.84$  Hz, 1H), 7.57 (s, 1H), 7.40 – 7.38 (m, 3H), 7.29 - 7.27 (m, 4H), 7.06 - 7.02 (d,  $J = 16.6$  Hz, 1H), 6.85 – 6.83 (m, 2H), 6.51- 6.47 (d,  $J = 17.4$  Hz, 1H), 3.81 (s, 3H), 2.69 (s, 3H);  $^{13}\text{C}$  NMR (100MHz,  $\text{CDCl}_3$ )  $\delta$  197.3, 162.2, 155.6, 147.2, 146.2, 144.6, 134.7, 133.7, 132.5, 131.1, 130.7, 130.4, 129.9, 128.9, 128.7, 126.7, 126.3, 125.6, 125.2, 114.6, 55.6, 24.1, GC – MS : m/e 415.2,  $\text{C}_{26}\text{H}_{20}\text{ClNO}_2$  required Mol. Wt.: 413.9.

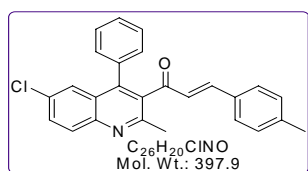

Pale yellow solid, m.p 140 – 142 °C,  $^1\text{H}$  NMR (400 MHz,  $\text{CDCl}_3$ )  $\delta$  8.08 - 8.06 (d,  $J = 8.4$  Hz, 1H), 7.70 - 7.68 (d,  $J = 8.4$  Hz, 1H), 7.58 (s, 1H), 7.41 - 7.38 (m, 3H), 7.29 – 7.27 (m, 2H), 7.23 – 7.22 (m, 2H) 7.15 – 7.13 (m, 2H), 7.08 – 7.04 (d,  $J = 15.73$ , 1H) 6.58 - 6.54 (d,  $J = 15.84$  Hz, 1H), 2.69 (s, 3H), 2.35 (s, 3H);  $^{13}\text{C}$  NMR (100 MHz,  $\text{CDCl}_3$ )  $\delta$  197.5, 155.5, 147.4, 146.2, 144.7, 141.9, 134.6, 133.5, 132.6, 131.3, 131.1, 130.6, 130.0, 129.8, 128.9, 128.7, 128.6, 126.8, 126.3, 125.2, 24.1, 21.7; IR ( $\nu$ ,  $\text{cm}^{-1}$ ) 2922, 2858, 2746, 2682, 1645, 1597, 1566, 1479, 1390, 1224, 1182, 1159, 1078, 1047, 1029, 981, 702, 497; GC – MS : m/e 397.26,  $\text{C}_{26}\text{H}_{20}\text{ClNO}$  required Mol. Wt.: 397.9.

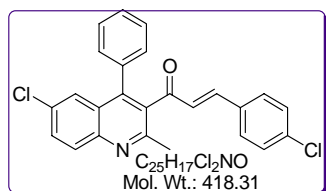

Light white solid, m.p 133 – 136 °C,  $^1\text{H}$  NMR (400 MHz,  $\text{CDCl}_3$ )  $\delta$  8.08 - 8.06 (d,  $J = 8.4$  Hz, 1H), 7.71 - 7.69 (d,  $J = 8.8$  Hz, 1H), 7.61 (s, 1H), 7.43 – 7.40 (m, 3H), 7.32 – 7.29 (m, 5H), 7.25 – 7.24 (d,  $J = 5.42$  Hz, 1H), 7.08 - 7.04 (d,  $J = 16.4$  Hz, 1H), 6.57 - 6.53 (d,  $J = 16.0$  Hz, 1H), 2.71 (s, 3H);  $^{13}\text{C}$  NMR (100 MHz,  $\text{CDCl}_3$ )  $\delta$  197.0, 155.4, 146.3, 145.2, 144.7, 137.2, 134.6, 133.3, 132.7, 132.5, 131.2, 130.7, 130.0, 129.6, 129.4, 129.1, 128.8, 127.9, 126.2, 125.2, 24.1; IR ( $\nu$ ,  $\text{cm}^{-1}$ ) 3016, 2970, 2924, 1651, 1625, 1608, 1579, 1564, 1481, 1440, 1404, 1220, 1161, 1078, 983, 829, 704; LC – MS : m/e 418.57,  $\text{C}_{25}\text{H}_{17}\text{Cl}_2\text{NO}$  required Mol. Wt.: 418.31.;

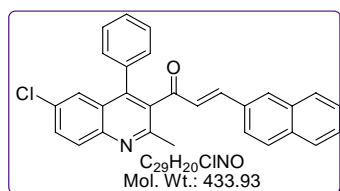

Light yellow solid, m.p 156 – 157 °C,  $^1\text{H}$  NMR (400 MHz,  $\text{CDCl}_3$ )  $\delta$  8.09 - 8.07 (d,  $J = 8.4$  Hz, 1H), 7.99 - 7.95 (d,  $J = 16.0$  Hz, 1H), 7.88 - 7.84 (m, 2H), 7.78 – 7.76 (d,  $J = 6.67$  Hz, 1H), 7.72 - 7.70 (d,  $J = 7.6$  Hz, 1H), 7.63 (s, 1H), 7.49 - 7.36 (m, 9H), 6.69 - 6.65 (d,  $J = 16.0$  Hz, 1H), 2.76 (s, 3H);  $^{13}\text{C}$  NMR (100 MHz,  $\text{CDCl}_3$ )  $\delta$  197.0, 155.4, 146.2, 144.6, 143.4, 134.6, 133.6, 132.5, 131.3, 131.1, 130.6, 130.2, 130.1 129.0, 128.9, 128.7, 127.1, 126.4, 126.1, 125.5, 125.4, 125.1, 122.9, 24.1; IR ( $\nu$ ,  $\text{cm}^{-1}$ ) 2854, 1649, 1629, 1479, 1402, 1261, 1219, 1122,

1076, 975, 945, 837, 804, 775, 700, 594; LC – MS : m/e 433.2, C<sub>25</sub>H<sub>17</sub>Cl<sub>2</sub>NO required Mol. Wt.: 433.93.;

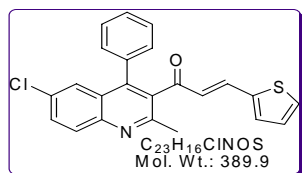

Light Brown solid, m.p 158 – 160 °C, <sup>1</sup>H NMR (400 MHz, CDCl<sub>3</sub>) δ 8.07 - 8.05 (d, *J* = 8.95 Hz, 1H), 7.70 - 7.67 (dd, *J* = 9.01, 2.29 Hz, 1H), 7.58-7.57 (d, *J* = 2.17 Hz, 1H), 7.55-7.53 (t, *J* = 3.5 Hz, 1H), 7.43-7.39 (m, 3H), 7.30 - 7.28 (dd, *J* = 7.72, 2.16 Hz, 2H), 7.24-7.20 (d, *J* = 15.88 Hz, 1H), 7.14-7.13 (d, *J* = 3.56 Hz, 1H), 7.03-7.01 (dd, *J* = 4.93, 3.8 Hz, 1H), 6.41-6.37 (d, *J* = 15.84 Hz, 1H), 2.70 (s, 3H); <sup>13</sup>C NMR (100MHz, CDCl<sub>3</sub>) δ 195.4, 154.3, 145.1, 143.6, 138.2, 137.8, 133.4, 132.3, 131.4, 131.1, 129.9, 129.5, 128.9, 128.8, 127.9, 127.6, 127.4, 125.3, 125.1, 124.0, 22.9. GC – MS : m/e 390.4, C<sub>23</sub>H<sub>16</sub>ClNOS required Mol. Wt.: 389.9

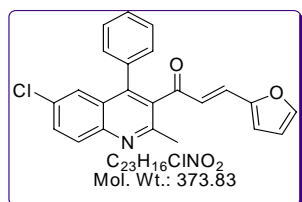

<sup>1</sup>H NMR (400 MHz, CDCl<sub>3</sub>) δ 8.06 - 8.04 (d, *J* = 8.84 Hz, 1H), 7.69 - 7.67 (d, *J* = 8.84 Hz, 1H), 7.57 (s, 1H), 7.47 – 7.42 (m, 4H), 7.30-7.28 (m, 2H), 6.88 - 6.84 (d, *J* = 16.08 Hz, 1H), 6.56-6.55 (d, *J* = 3.13 Hz, 1H), 6.50 – 6.45 (d, *J* = 16.72 Hz, 1H), 6.45 – 6.44 (d, *J* = 3.85 Hz, 1H), 2.69 (s, 3H); <sup>13</sup>C NMR (100MHz, CDCl<sub>3</sub>) δ 196.6, 155.3, 150.4, 145.7, 134.4, 133.4, 132.4, 131.0, 130.4, 129.9, 128.9, 128.6, 125.1, 124.9, 116.9, 112.8, 23.8 ; IR (ν, cm<sup>-1</sup>) 3028, 2920, 2850, 1666, 1643, 1624, 1595, 1546, 1479, 1444, 1390, 1340, 1311, 1280, 1263, 1222, 1192, 1155, 1124, 1080, 1045, 1008, 970, 883, 833, 761, 750; UPLC – MS : m/e 374.54, C<sub>23</sub>H<sub>16</sub>ClNO<sub>2</sub> required Mol. Wt.: 373.83

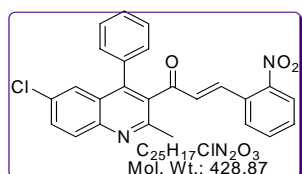

White solid, m.p 223 – 225 °C, <sup>1</sup>H NMR (400 MHz, CDCl<sub>3</sub>) δ 8.06 – 8.04 (d, *J* = 8.58 Hz, 1H) 8.01 - 7.99 (d, *J* = 7.05 Hz, 1H), 7.69 - 7.67 (d, *J* = 9.2 Hz, 1H), 7.58 – 7.52 (m, 4H), 7.45 – 7.42 (m, 3H), 7.34 – 7.29 (m, 3H), 2.72 (s, 3H); <sup>13</sup>C NMR (100 MHz, CDCl<sub>3</sub>) δ 197.3, 155.2, 146.4, 145.0, 142.4, 134.5, 133.8, 132.7, 132.7, 132.3, 131.4, 130.9, 130.8, 130.6, 130.4, 129.3, 129.1, 128.8, 126.1, 125.2, 24.1; IR (ν, cm<sup>-1</sup>) 1624, 1564, 1479, 1382, 1222, 1201, 1161, 1082, 1045, 972, 831, 765, 711, 702, 588, 484; LC – MS : m/e 429.61, C<sub>25</sub>H<sub>17</sub>ClN<sub>2</sub>O<sub>3</sub> required Mol. Wt.: 428.87

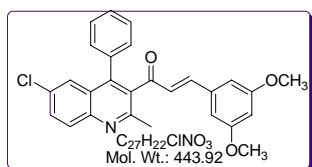

Yellow solid, Yield, m.p 166 – 169 °C, <sup>1</sup>H NMR (400 MHz, CDCl<sub>3</sub>) δ 8.07 - 8.05 (d, *J* = 8.92 Hz, 1H), 7.70 - 7.67 (dd, *J* = 8.96, 2.16 Hz, 1H), 7.58 - 7.57 (d, *J* = 2.04 Hz, 1H), 7.46 - 7.42 (d, *J* = 16.44 Hz, 1H), 7.41 - 7.39 (m, 3H), 7.30 - 7.29 (m, 2H), 6.92 - 6.89 (dd, *J* = 9.01, 2.92 Hz, 1H), 6.82 - 6.77 (m, 2H), 6.65 - 6.61 (d, *J* = 16.4 Hz, 1H), 3.74 (s, 3H) 3.73 (s, 3H), 2.70 (s, 3H); <sup>13</sup>C NMR (100 MHz, CDCl<sub>3</sub>) δ 197.7, 155.5, 153.4, 152.9, 146.1, 144.6, 142.5, 134.6, 133.6, 132.3, 130.9, 130.6, 130.1, 128.8, 128.5, 128.2, 126.3, 125.2, 123.4, 118.3, 112.8, 112.4, 55.9, 55.8, 24.01; IR (ν, cm<sup>-1</sup>) 3441, 3003, 2939, 2833, 1643, 1612, 1571, 1492, 1479, 1462, 1444, 1425.40, 1390, 1309, 1288, 1276, 1240, 1222, 1205, 1186, 1163, 1124, 1080, 1047, 1024, 975, 837, 804; LC – MS : m/e 444.48, C<sub>27</sub>H<sub>22</sub>ClNO<sub>3</sub> required Mol. Wt.: 443.92.

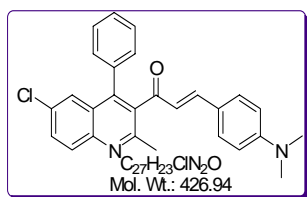

Light yellow solid, m.p 175 – 177 °C,  $^1\text{H}$  NMR (400 MHz,  $\text{CDCl}_3$ )  $\delta$  8.07 - 8.04 (d,  $J$  = 8.8 Hz, 1H), 7.68 - 7.65 (dd,  $J$  = 8.93, 2.36 Hz, 1H), 7.56 – 7.55 (d,  $J$  = 2.25 Hz, 1H), 7.40 – 7.37 (m, 3H), 7.30 - 7.29 (d,  $J$  = 2.8 Hz, 1H), 7.28 - 7.27 (d,  $J$  = 2.0 Hz, 1H), 7.25 – 7.24 (d,  $J$  = 2.18 Hz, 1H), 7.23 – 7.22 (d,  $J$  = 2.18 Hz, 1H), 7.02 - 6.98 (d,  $J$  = 16.0 Hz, 1H), 6.61 - 6.58 (d,  $J$  = 8.8 Hz, 2H), 6.47 - 6.43 (d,  $J$  = 16.0 Hz, 1H), 3.01 (s, 6H), 2.70 (s, 3H);  $^{13}\text{C}$  NMR (100 MHz,  $\text{CDCl}_3$ )  $\delta$  191.8, 150.2, 146.7, 144.0, 142.0, 140.9, 139.3, 129.4, 128.2, 127.2, 125.7, 125.3, 124.6, 123.3, 121.6, 120.5, 119.9, 118.2, 105.8, 104.5, 50.7, 18.7; LC – MS : m/e 427.36,  $\text{C}_{27}\text{H}_{23}\text{ClN}_2\text{O}$  required Mol. Wt.: 426.94.

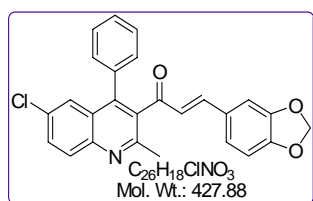

Light yellow solid, m.p 159 – 160 °C,  $^1\text{H}$  NMR (400 MHz,  $\text{CDCl}_3$ )  $\delta$  8.06 - 8.04 (d,  $J$  = 9.01 Hz, 1H), 7.69 - 7.66 (d,  $J$  = 9.09 Hz, 1H), 7.57 (s, 1H), 7.41 - 7.40 (m, 3H), 7.29 - 7.27 (m, 2H), 7.02 – 6.98 (d,  $J$  = 16.16 Hz, 1H), 6.82 – 6.74 (m, 3H), 6.44 – 6.40 (d,  $J$  = 16.13 Hz, 1H), 5.99 (s, 2H), 2.69 (s, 3H);  $^{13}\text{C}$  NMR (100 MHz,  $\text{CDCl}_3$ )  $\delta$  196.9, 155.4, 150.4, 148.5, 146.8, 146.1, 144.5, 134.6, 133.5, 132.4, 130.9, 130.6, 129.9, 128.9, 128.6, 128.4, 126.2, 125.8, 125.4, 125.1, 108.6, 106.5, 101.7, 23.9; IR (v,  $\text{cm}^{-1}$ ) 2964, 2920, 2854, 2791, 2700, 1643, 1620, 1598, 1566, 1500, 1489, 1448, 1390, 1261, 1215, 1107, 1080, 1035, 829, 800, 704, 609.51, 563.21, 534.2; LC – MS : m/e 428.42,  $\text{C}_{26}\text{H}_{18}\text{ClNO}_3$  required Mol. Wt.: 427.88

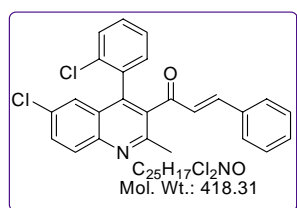

Pale yellow solid, m.p 172 – 174 °C,  $^1\text{H}$  NMR (400 MHz,  $\text{CDCl}_3$ )  $\delta$  8.09 - 8.06 (d,  $J$  = 9.01 Hz, 1H), 7.71 - 7.68 (dd,  $J$  = 8.99, 2.16 Hz, 1H), 7.44 - 7.40 (m, 2H), 7.38 – 7.36 (m, 4H), 7.35 - 7.34 (d,  $J$  = 3.6 Hz, 2H), 7.32 - 7.31 (m, 2H), 7.24 – 7.23 (d,  $J$  = 2.59 Hz, 1H), 6.70 - 6.66 (d,  $J$  = 16.32 Hz, 1H), 2.71 (s, 3H);  $^{13}\text{C}$  NMR (100MHz,  $\text{CDCl}_3$ )  $\delta$  196.8, 155.5, 147.6, 145.8, 141.8, 133.9, 133.8, 133.3, 133.2, 132.76, 132.3, 131.2, 131.1, 130.7, 130.6, 129.8, 129.0, 128.6, 127.2, 127.0, 125.5, 124.8, 23.9; LC – MS : m/e 418.07,  $\text{C}_{25}\text{H}_{17}\text{Cl}_2\text{NO}$  required Mol. Wt.: 418.31.

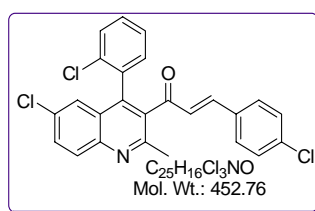

pale yellow solid, m.p 145 – 147 °C,  $^1\text{H}$  NMR (400 MHz,  $\text{CDCl}_3$ )  $\delta$  8.08 - 8.06 (d,  $J$  = 8.96 Hz, 1H), 7.71 - 7.68 (dd,  $J$  = 8.95, 2.32 Hz, 1H), 7.43 - 7.41 (dd,  $J$  = 5.4, 2.3 Hz, 1H), 7.39 - 7.34 (m, 2H), 7.32 - 7.31 (m, 5H), 7.24 - 7.20 (m, 2H), 6.64 - 6.60 (d,  $J$  = 16.28 Hz, 1H), 2.70 (s, 3H);  $^{13}\text{C}$  NMR (100MHz,  $\text{CDCl}_3$ )  $\delta$  196.7, 155.6, 145.9, 142.0, 137.3, 133.8, 133.4, 133.3, 132.9, 132.5, 132.4, 131.4, 130.9, 130.9, 129.9, 129.9, 129.5, 127.5, 127.4, 125.6, 124.9, 24.0; LC – MS : m/e 452.19,  $\text{C}_{26}\text{H}_{18}\text{ClNO}_3$  required Mol. Wt.: 452.76.

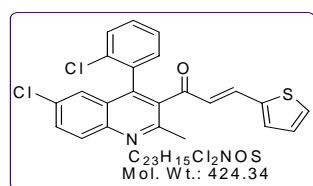

Off White solid, m.p 146 -148 °C,  $^1\text{H}$  NMR (400 MHz,  $\text{CDCl}_3$ )  $\delta$  8.08 - 8.06 (d,  $J$  = 8.96 Hz, 1H), 7.70 - 7.67 (dd,  $J$  = 8.99, 2.24 Hz, 1H), 7.46 – 7.34 (m, 5H), 7.32 - 7.31 (d,  $J$  = 2.19 Hz, 1H), 7.25 - 7.23 (dd,  $J$  = 6.94, 2.15 Hz, 2H), 7.18 – 7.17 (d,  $J$  = 3.42 Hz, 1H), 7.04 – 7.02 (dd,  $J$  = 4.83, 3.90 Hz, 2H), 6.49 - 6.45 (d,  $J$  = 15.99 Hz, 1H), 2.71 (s, 3H);  $^{13}\text{C}$  NMR (100 MHz,  $\text{CDCl}_3$ )  $\delta$  196.0, 155.6, 145.8, 141.9, 139.7,



139.2, 133.7, 133.3, 133.2, 132.7, 132.6, 132.2, 131.2, 130.7, 130.6, 130.3, 129.9, 128.5, 127.2, 125.8, 125.5, 124.8, 23.9; LC – MS : m/e 424.34, C<sub>26</sub>H<sub>20</sub>Cl<sub>2</sub>N<sub>2</sub>O<sub>2</sub> required Mol. Wt.: 424.34.

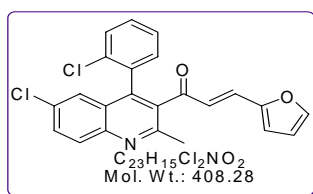

Off White solid, m.p °C, <sup>1</sup>H NMR (400 MHz, CDCl<sub>3</sub>) δ 8.07 - 8.05 (d, *J* = 8.96 Hz, 1H), 7.70 - 7.67 (dd, *J* = 8.99, 2.24 Hz, 1H), 7.58 - 7.57 (d, *J* = 2.21 Hz, 1H), 7.42 - 7.40 (m, 2H), 7.29 - 7.27 (m, 2H), 7.02 - 6.98 (d, *J* = 16.12 Hz, 1H), 6.82 - 6.80 (m, 2H), 6.76 - 6.74 (d, *J* = 7.92 Hz, 1H), 6.44 - 6.40 (d, *J* = 16.12 Hz, 1H), 2.69 (s, 3H); <sup>13</sup>C NMR (100 MHz, CDCl<sub>3</sub>) δ 197.0, 155.4, 150.4, 148.5, 146.8, 146.1, 144.5, 134.6, 133.5, 132.4, 130.9, 130.6, 129.9, 128.9, 128.6, 128.4, 125.7, 125.4, 125.1, 108.6, 106.5, 101.7, 23.9; LC – MS : m/e 408.22, C<sub>23</sub>H<sub>15</sub>Cl<sub>2</sub>NO<sub>2</sub> required Mol. Wt.: 408.28.

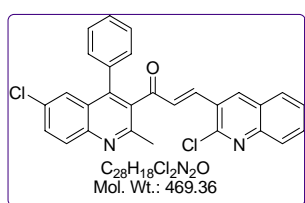

light yellow solid, m.p 203 – 205 °C, <sup>1</sup>H NMR (400 MHz, CDCl<sub>3</sub>) δ 8.11 (s, 1H), 8.09 – 8.07 (d, *J* = 8.95 Hz, 1H), 7.99 - 7.97 (d, *J* = 8.45 Hz, 1H), 7.80 - 7.79 (d, *J* = 4.91 Hz, 1H), 7.77 – 7.75 (dd, *J* = 8.38, 1.31 Hz, 1H), 7.71 – 7.70 (dd, *J* = 8.98, 2.36 Hz, 1H), 7.64 – 7.63 (d, *J* = 2.25 Hz, 1H), 7.61 – 7.59 (dd, *J* = 7.95, 0.9 Hz, 1H), 7.57 – 7.53 (d, *J* = 16.09 Hz, 1H), 7.48 – 7.41 (m, 3H), 7.39 – 7.37 (m, 2H), 6.67 – 6.63 (d, *J* = 16.2 Hz, 1H), 2.74 (s, 3H); <sup>13</sup>C NMR (100MHz, CDCl<sub>3</sub>) δ 196.7, 155.3, 149.8, 148.1, 146.3, 144.9, 140.9, 136.4, 134.5, 132.7, 132.7, 132.0, 131.3, 131.1, 130.7, 130.3, 129.1, 128.5, 128.1, 127.87, 126.9, 126.8, 125.9, 125.1, 24.1.; IR (v, cm<sup>-1</sup>) 3057, 2962, 2916, 2906, 2848, 2250, 1961, 1649, 1612, 1579, 1566, 1479, 1402, 1392, 1379, 1261, 1217, 1095, 1022, 975, 866, 800, 765, 705; LC – MS : m/e 469.25, C<sub>28</sub>H<sub>18</sub>Cl<sub>2</sub>N<sub>2</sub>O required Mol. Wt.: 469.36.

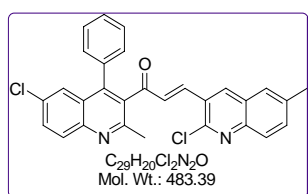

yellow solid, m.p 194 – 196 °C, <sup>1</sup>H NMR (400 MHz, CDCl<sub>3</sub>) δ 8.09 - 8.07 (d, *J* = 8.96 Hz, 1H), 8.02 (s, 1H), 7.87 - 7.84 (d, *J* = 8.56 Hz, 1H), 7.72 - 7.69 (dd, *J* = 8.98, 2.61 Hz, 1H), 7.63 - 7.62 (d, *J* = 1.8 Hz, 1H), 7.59 - 7.57 (d, *J* = 8.84 Hz, 1H), 7.56 – 7.52 (m, 2H), 7.47 - 7.41 (m, 3H), 7.38 - 7.36 (d, *J* = 6.64 Hz, 2H), 6.65 - 6.61 (d, *J* = 16.2 Hz, 1H), 2.74 (s, 3H), 2.53 (s, 3H); <sup>13</sup>C NMR (100MHz, CDCl<sub>3</sub>) δ 196.8, 155.3, 148.9, 146.7, 146.3, 144.8, 141.2, 138.0, 135.7, 134.5, 134.3, 132.8, 132.6, 131.3, 130.9, 130.7, 130.3, 129.9, 129.1, 128.7, 128.1, 126.9, 126.8, 125.9, 125.1, 24.1, 21.6; LC – MS : m/e 483.30, C<sub>29</sub>H<sub>20</sub>Cl<sub>2</sub>N<sub>2</sub>O required Mol. Wt.: 483.39.

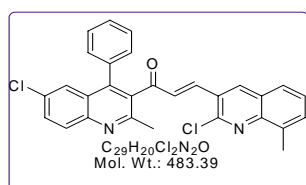

yellow solid, m.p 182 - 183 °C, <sup>1</sup>H NMR (400 MHz, CDCl<sub>3</sub>) δ 8.02 - 8.00 (m, 2H), 7.65 - 7.62 (dd, *J* = 9.0, 2.08 Hz, 1H), 7.56 - 7.53 (m, 2H), 7.52 - 7.46 (m, 2H), 7.38 - 7.34 (m, 3H), 7.33 - 7.30 (m, 2H), 7.19 (s, 1H), 6.59 - 6.55 (d, *J* = 16.24 Hz, 1H), 2.67 (s, 3H), 2.65 (s, 3H); <sup>13</sup>C NMR (100 MHz, CDCl<sub>3</sub>) δ 195.8, 154.3, 147.7, 146.3, 145.3, 143.8, 140.3, 135.8, 135.6, 133.4, 131.7, 131.6, 131.0, 130.2, 129.9, 129.6, 129.3, 128.0, 127.7, 126.6, 125.8, 125.5, 124.9, 124.9, 124.1, 23.0, 16.6; IR (v, cm<sup>-1</sup>) 1676, 1641, 1629, 1600, 1579, 1477, 1440, 1392, 1382, 1365, 1344, 1309, 1155, 1120, 1083, 1029, 1004, 972, 833, 769, 705; LC – MS : m/e 483.37, C<sub>29</sub>H<sub>20</sub>Cl<sub>2</sub>N<sub>2</sub>O required Mol. Wt.: 483.39.

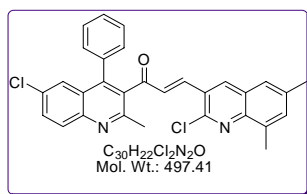

light yellow solid, m.p 172 – 175 °C,  $^1\text{H}$  NMR (400 MHz,  $\text{CDCl}_3$ )  $\delta$  8.09 - 8.07 (d,  $J = 8.96$  Hz, 1H), 7.99 (s, 1H), 7.72 - 7.69 (dd,  $J = 8.96, 2.12$  Hz, 1H), 7.63 - 7.62 (d,  $J = 1.8$  Hz, 1H), 7.56 - 7.52 (d,  $J = 16.2$  Hz, 1H), 7.46 - 7.40 (m, 4H), 7.37 - 7.36 (m, 3H), 6.65 - 6.61 (d,  $J = 16.2$  Hz, 1H), 2.74 (s, 3H), 2.68 (s, 3H), 2.47 (s, 3H);  $^{13}\text{C}$  NMR (100MHz,  $\text{CDCl}_3$ )  $\delta$  195.9, 154.3, 146.8, 145.3, 144.9, 143.8, 140.6, 136.6, 135.3, 134.9, 133.5, 133.4, 131.8, 131.6, 130.2, 129.6, 129.2, 128.9, 127.9, 127.7, 125.9, 125.3, 124.9, 124.1, 123.7, 23.0, 20.5, 16.5; IR ( $\nu$ ,  $\text{cm}^{-1}$ ) 1649, 1635, 1629, 1610, 1583, 1564, 1479, 1400, 1371, 1219, 1080, 975, 943, 879, 813, 759, 713, 696, 597, 557, 534.

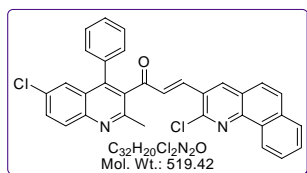

light yellow solid, Yield, m.p 235 - 237 °C,  $^1\text{H}$  NMR (400 MHz,  $\text{CDCl}_3$ )  $\delta$  9.12 - 9.10 (t,  $J = 5.08, 3.6$  Hz, 1H), 8.10 - 8.07 (m, 2H), 7.88 - 7.86 (d,  $J = 4.92$  Hz, 1H), 7.82 - 7.80 (d,  $J = 8.84$  Hz, 1H), 7.72 - 7.71 (m, 3H), 7.64 - 7.58 (m, 3H), 7.48 - 7.38 (m, 5H), 6.70 - 6.66 (d,  $J = 16.24$  Hz, 1H), 2.75 (s, 3H);  $^{13}\text{C}$  NMR (100 MHz,  $\text{CDCl}_3$ )  $\delta$  196.8, 155.3, 149.2, 147.2, 146.3, 144.9, 141.2, 135.7, 134.5, 134.3, 132.8, 132.6, 131.3, 130.8, 130.7, 130.3, 130.0, 129.6, 129.1, 129.1, 128.7, 127.9, 127.7, 126.9, 125.9, 125.1, 124.9, 124.3, 24.1; LC – MS : m/e 519.37,  $\text{C}_{32}\text{H}_{20}\text{Cl}_2\text{N}_2\text{O}$  required Mol. Wt.: 519.42.

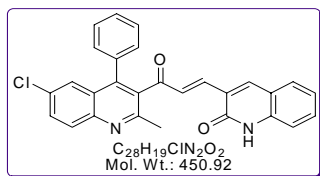

yellow solid, m.p 165 – 166 °C,  $^1\text{H}$  NMR (400 MHz,  $\text{CDCl}_3$ )  $\delta$  12.03 (s, 1H), 8.09 - 8.07 (d,  $J = 8.96$  Hz, 1H), 7.83 (s, 1H), 7.72 - 7.69 (dd,  $J = 8.97, 2.16$  Hz, 1H), 7.61 - 7.60 (d,  $J = 2.04$  Hz, 1H), 7.54 - 7.52 (d,  $J = 7.96$  Hz, 2H), 7.49 - 7.48 (d,  $J = 7.32$  Hz, 1H), 7.39 - 7.34 (m, 5H), 7.28 - 7.25 (m, 2H), 7.09 - 7.07 (d,  $J = 6.76$  Hz, 1H), 2.73 (s, 3H);  $^{13}\text{C}$  NMR (100MHz,  $\text{CDCl}_3$ )  $\delta$  197.9, 162.1, 155.4, 146.2, 144.7, 141.6, 138.5, 134.6, 133.4, 132.4, 131.0, 130.6, 130.3, 130.1, 129.9, 129.3, 128.9, 128.9, 128.6, 126.2, 125.1, 124.9, 123.3, 119.5, 115.6, 24.1; IR ( $\nu$ ,  $\text{cm}^{-1}$ ) 2997, 2960, 2922, 2850, 1737, 1701, 1676, 1575, 1556, 1467, 1438, 1390, 1377, 1354, 1201, 1166, 1080, 1028, 960, 837, 765, 734, 711, 636, 621; LC – MS : m/e 451.19,  $\text{C}_{29}\text{H}_{20}\text{Cl}_2\text{N}_2\text{O}$  required Mol. Wt.: 450.92.

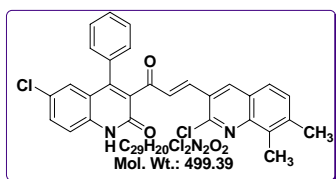

yellow solid, m.p 165 – 166 °C,  $^1\text{H}$  NMR (400 MHz,  $\text{CDCl}_3$ )  $\delta$  12.76 (s, 1H), 8.19 (s, 1H), 7.82 - 7.78 (d,  $J = 16.01$  Hz, 1H), 7.54 - 7.36 (m, 10H), 6.82 - 6.78 (d,  $J = 15.90$  Hz, 1H), 2.65 (s, 3H), 2.49 (s, 3H).;

SC016-CHA

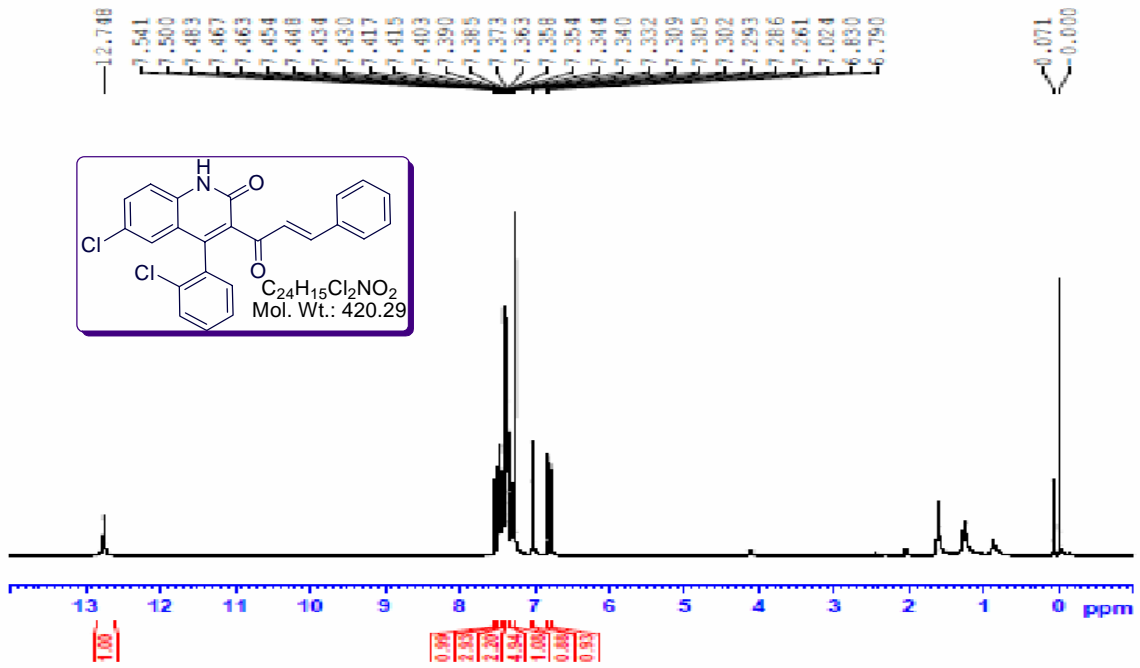

SY016-CHA

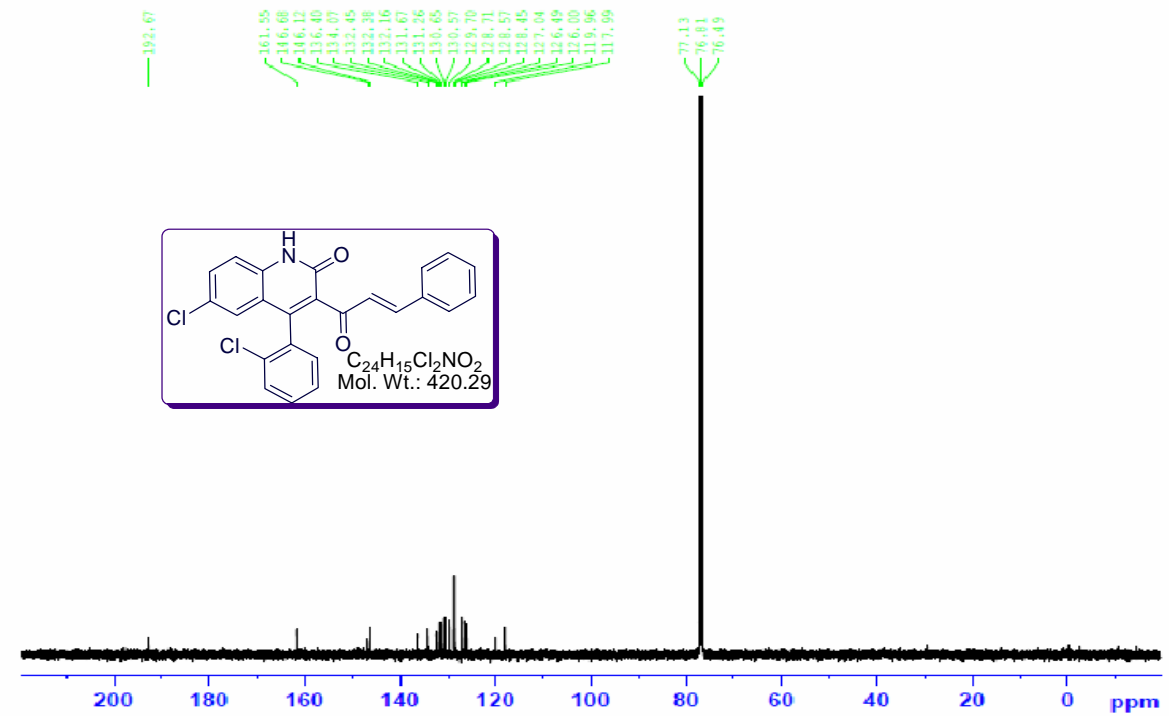

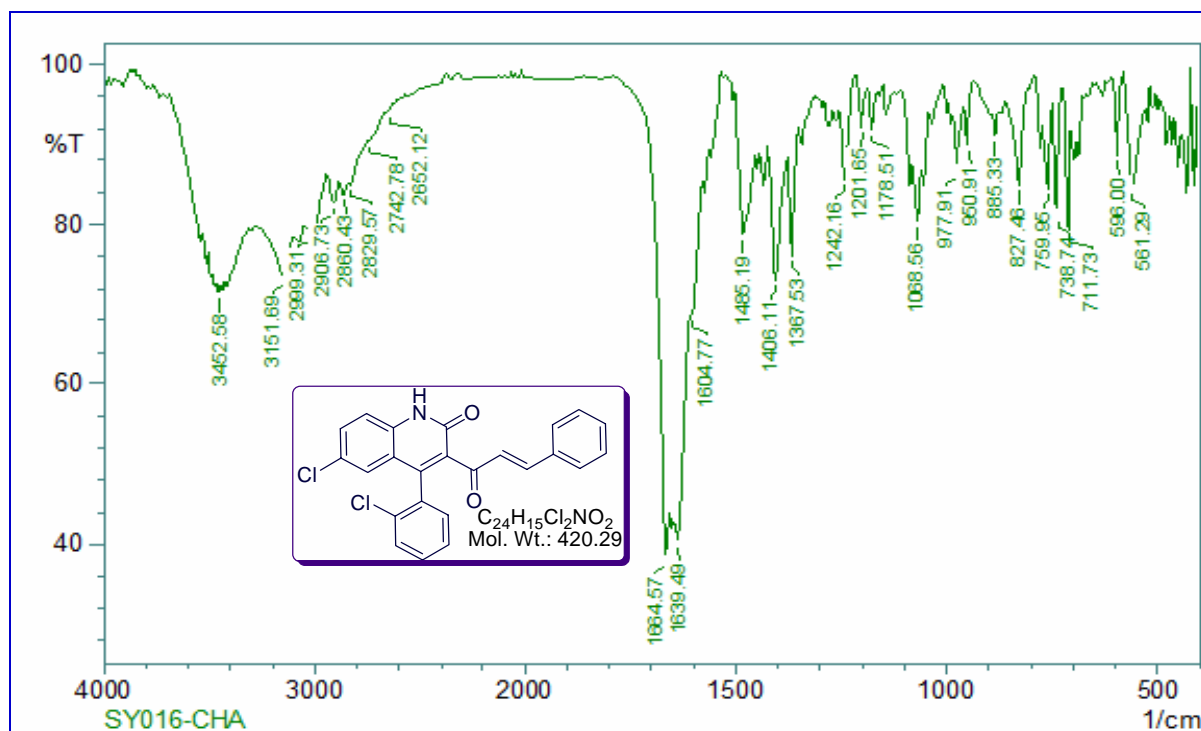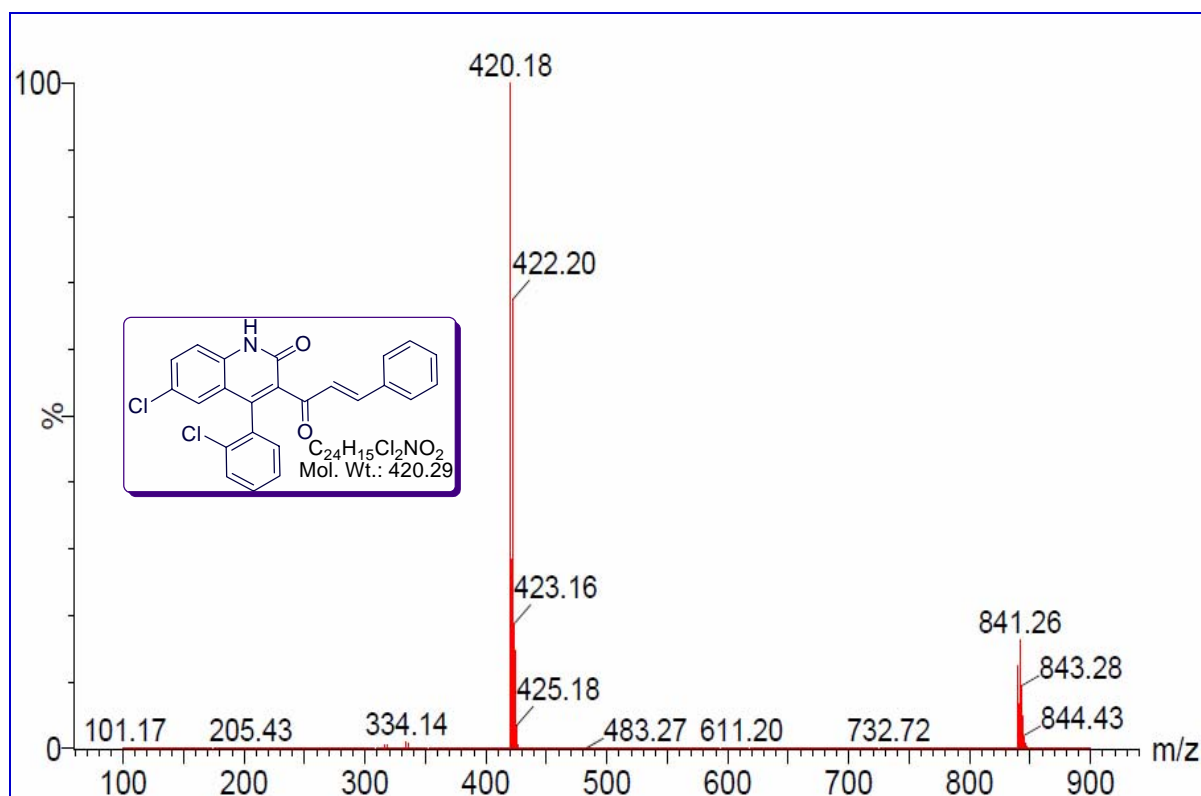

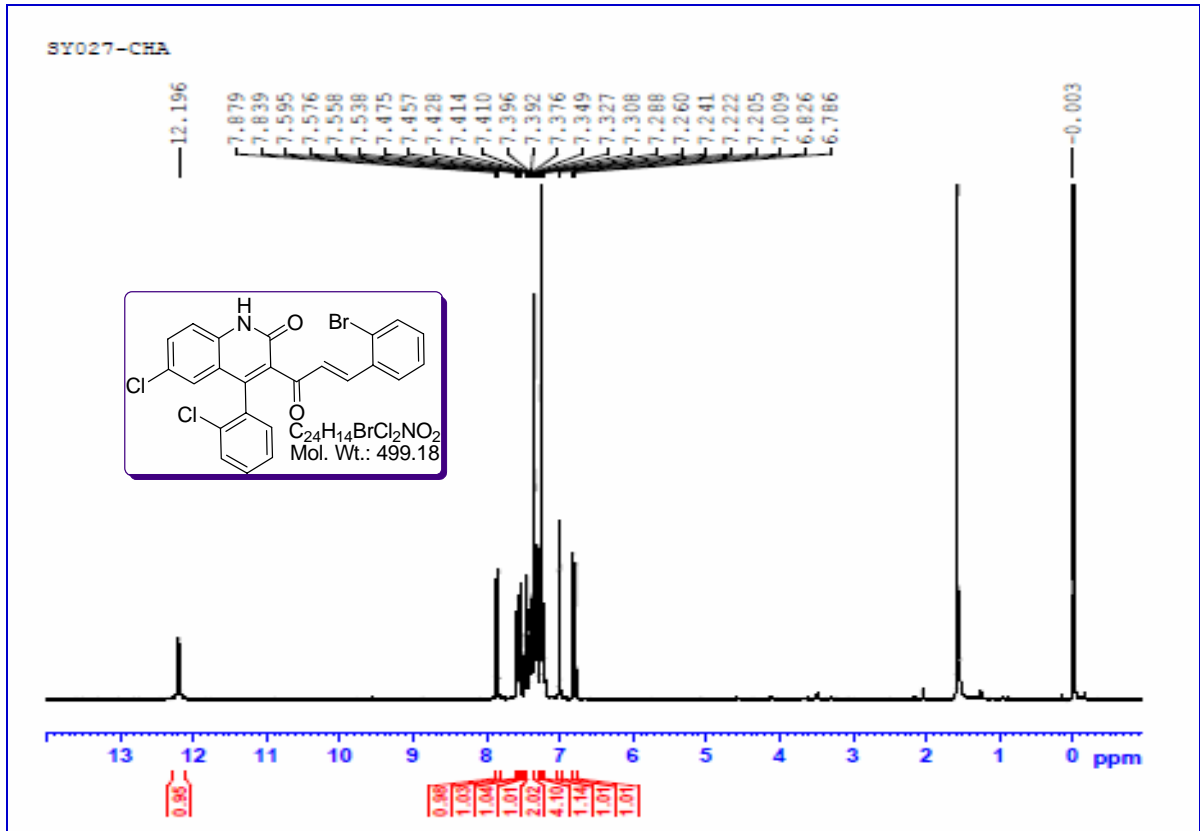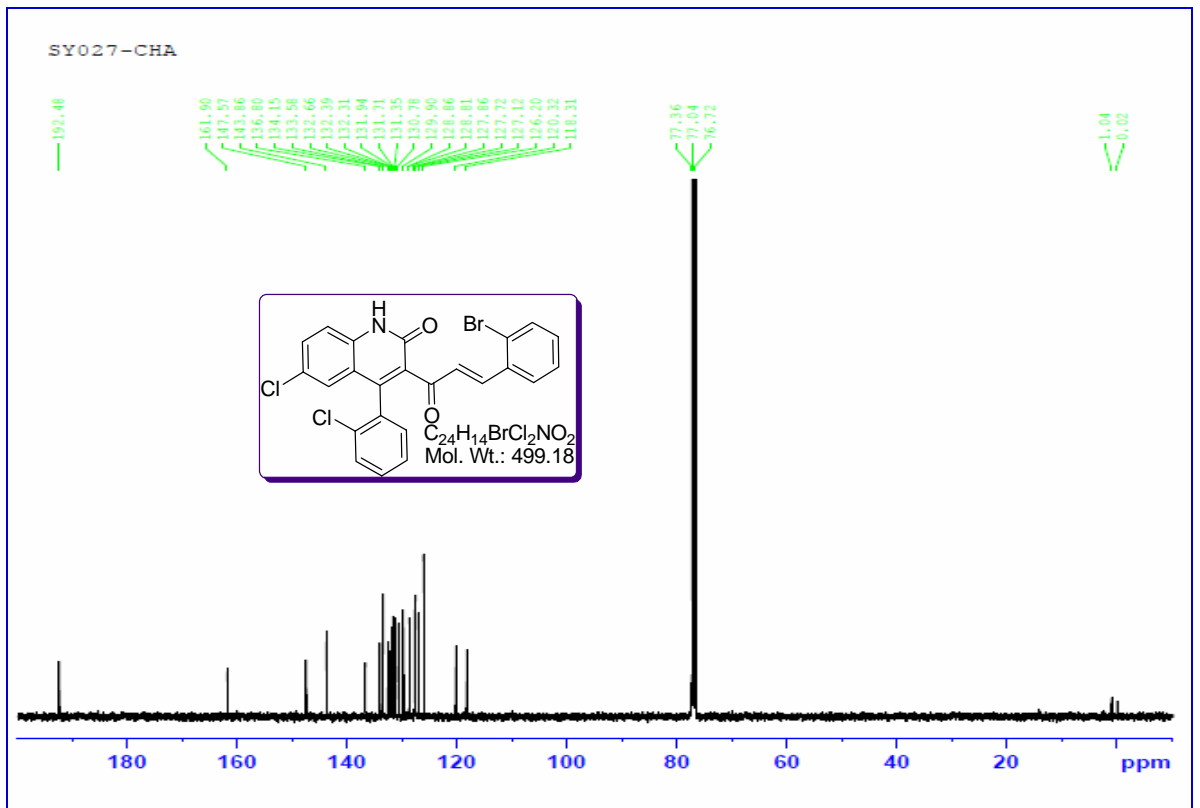

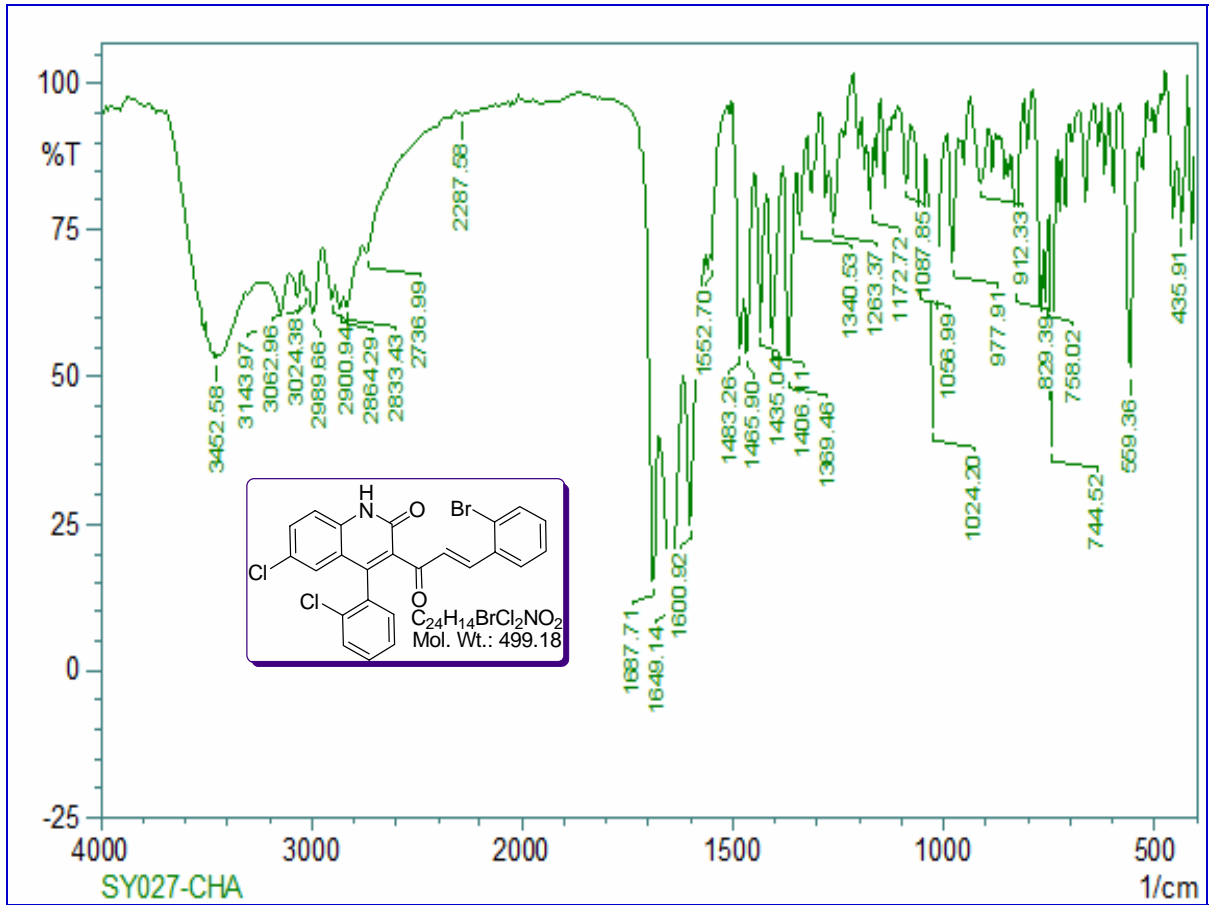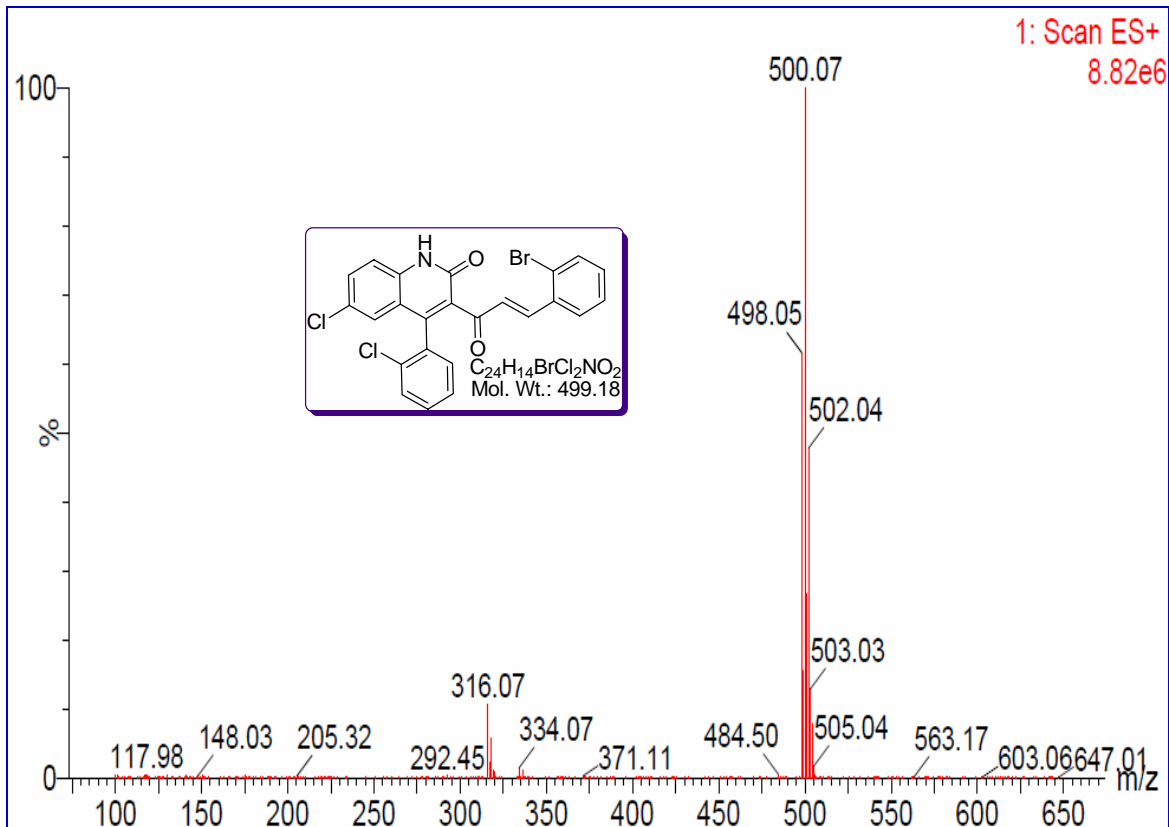

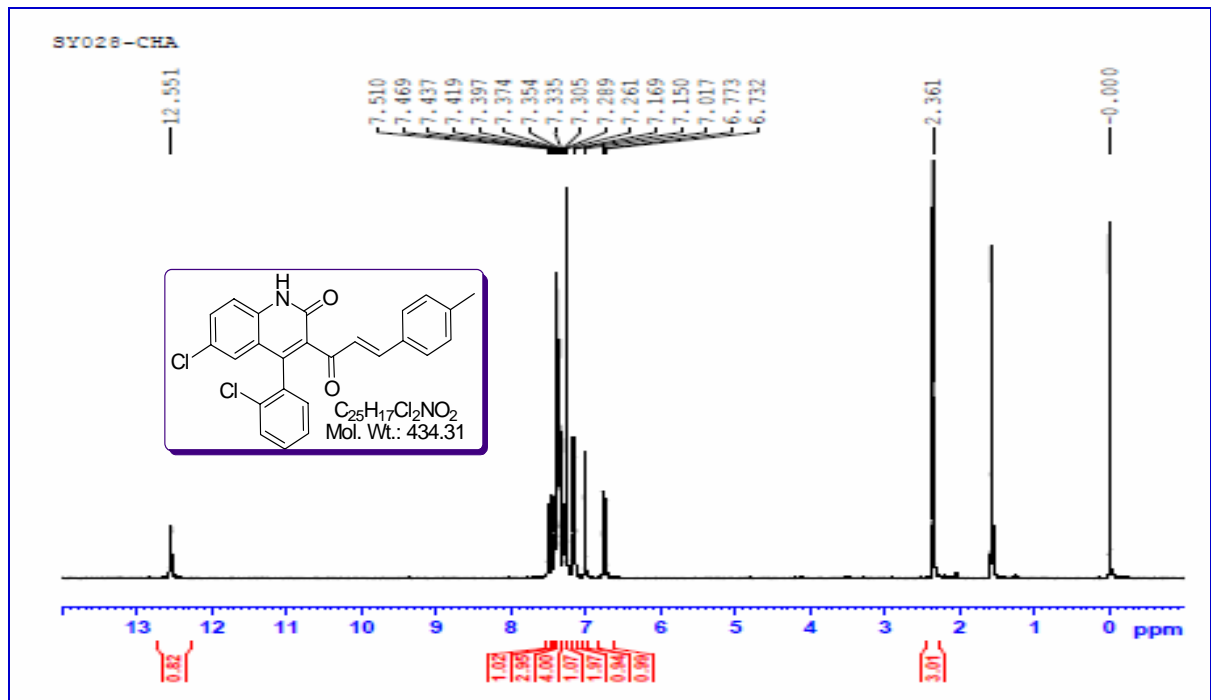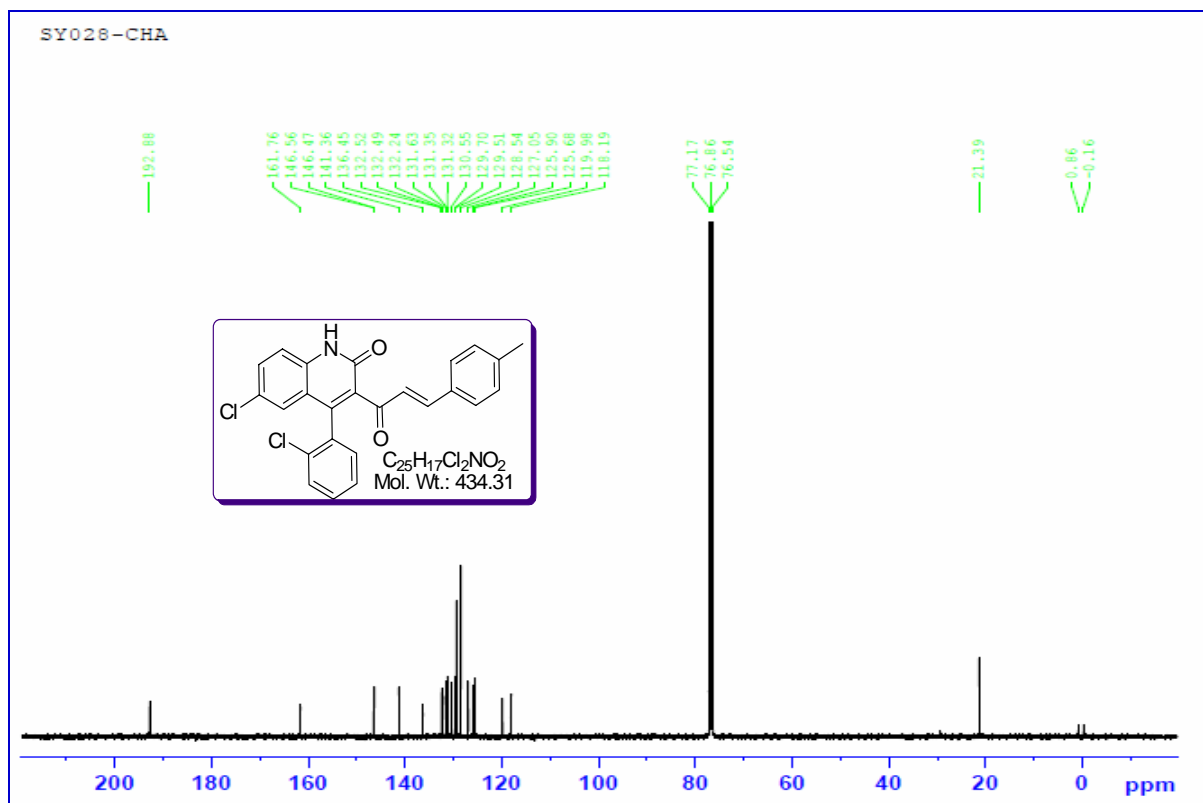

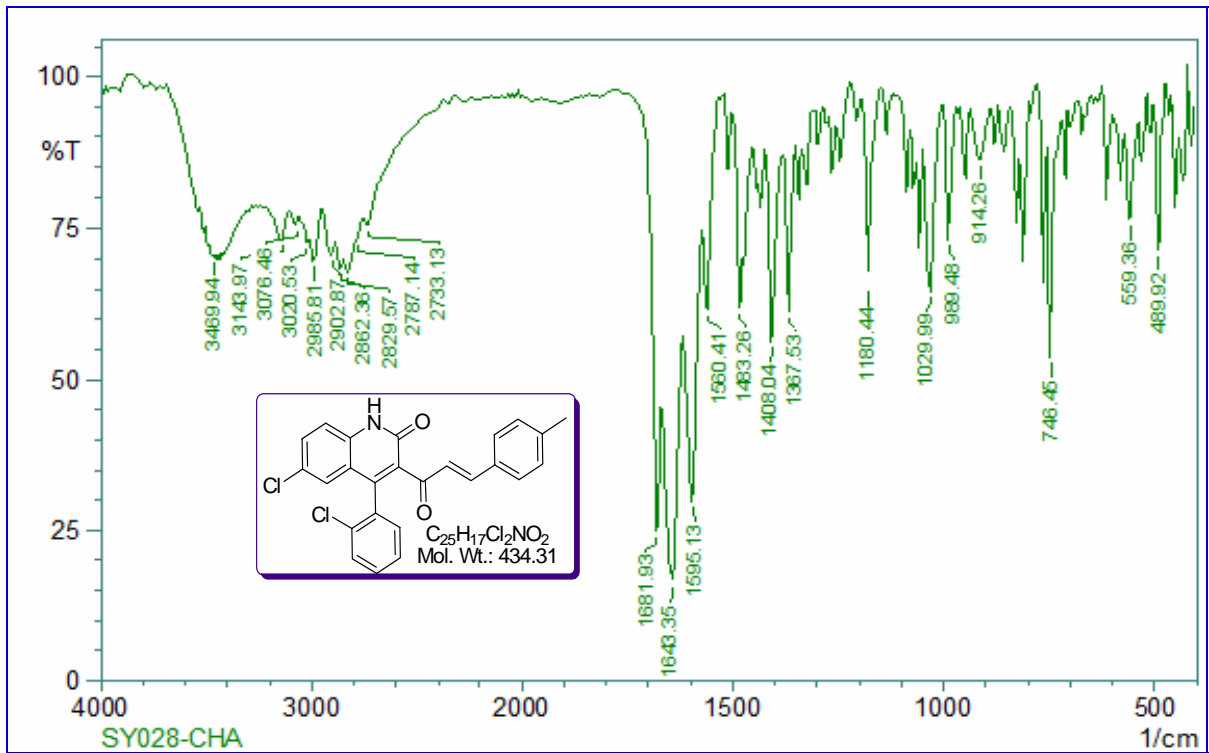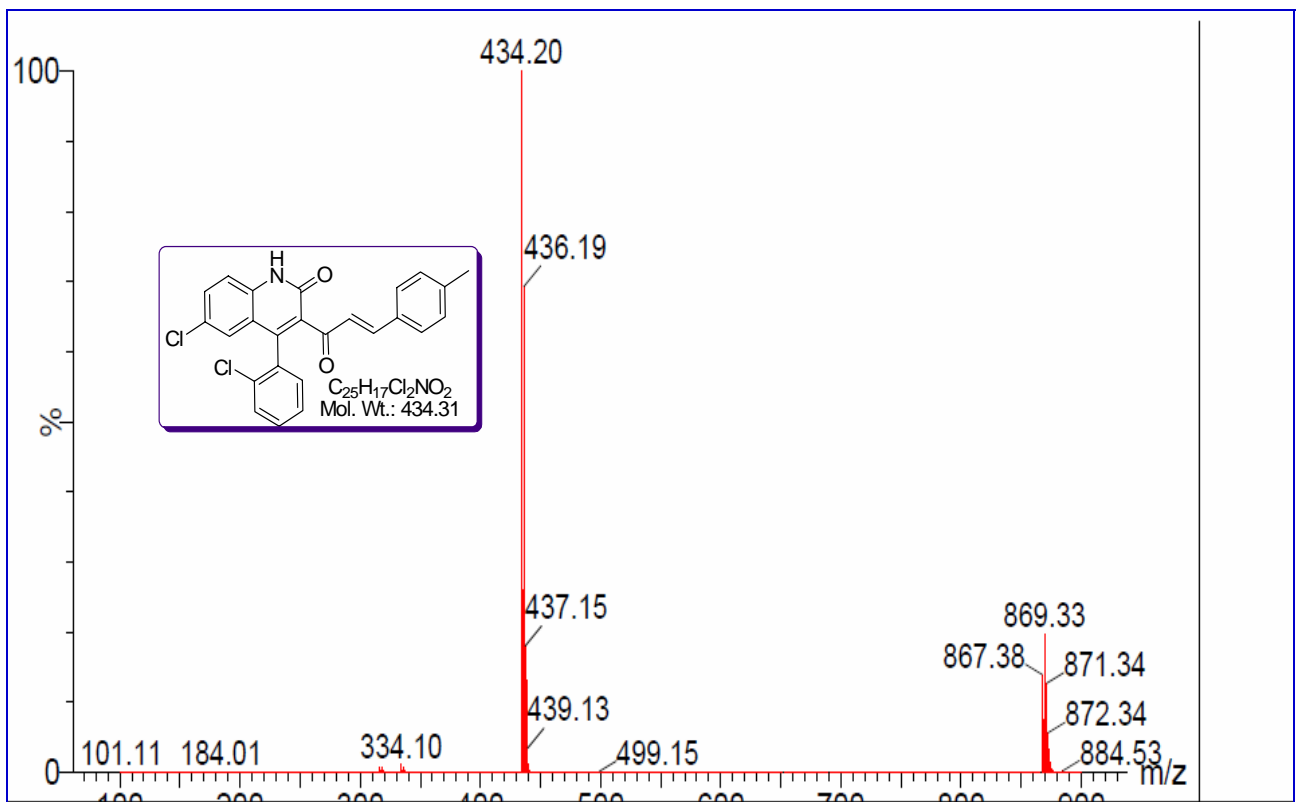



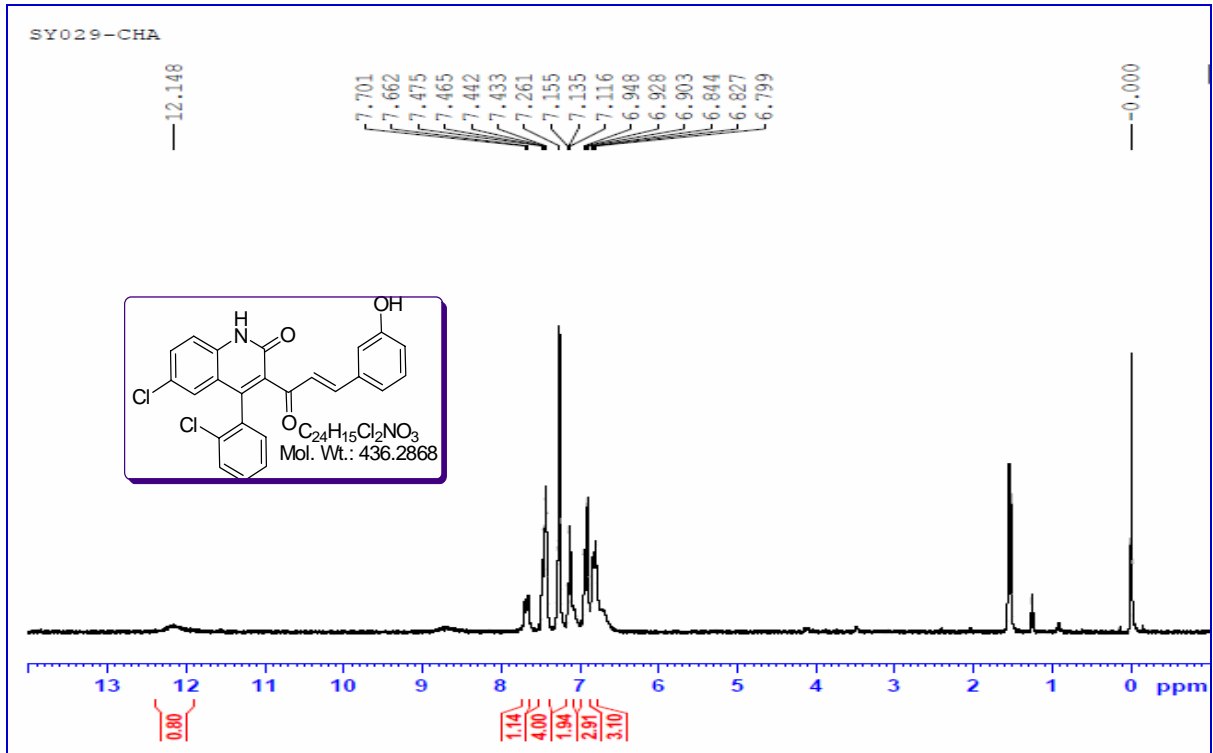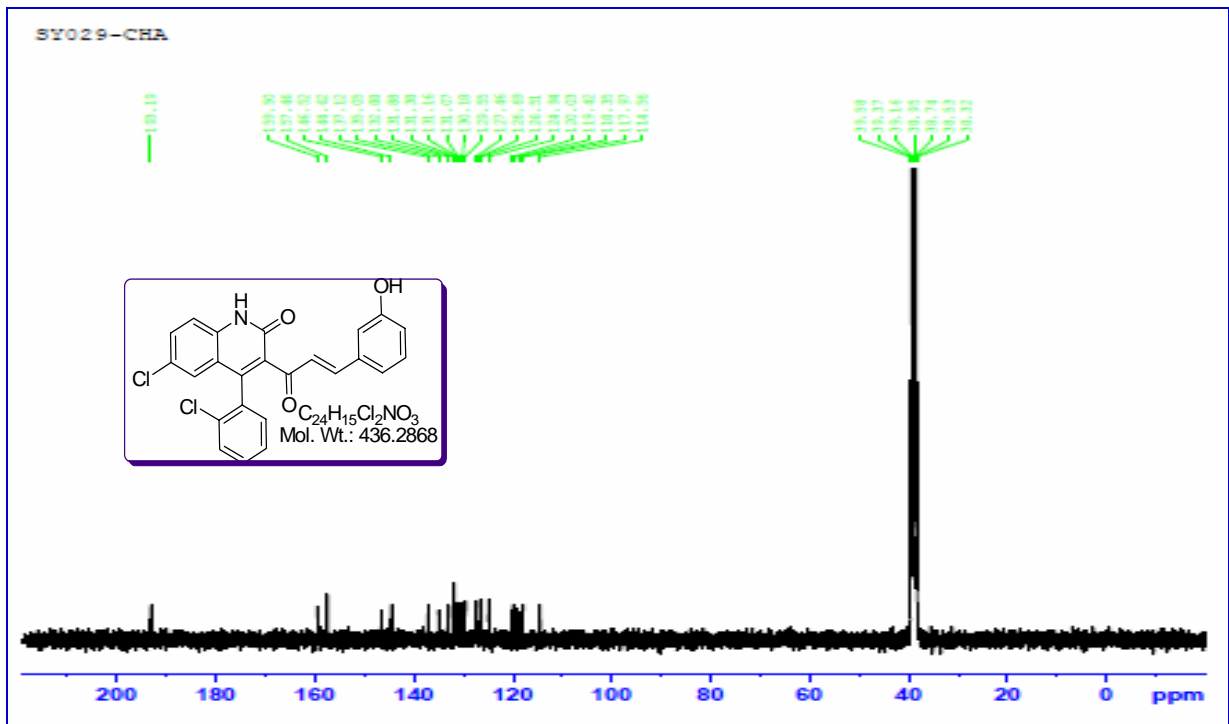

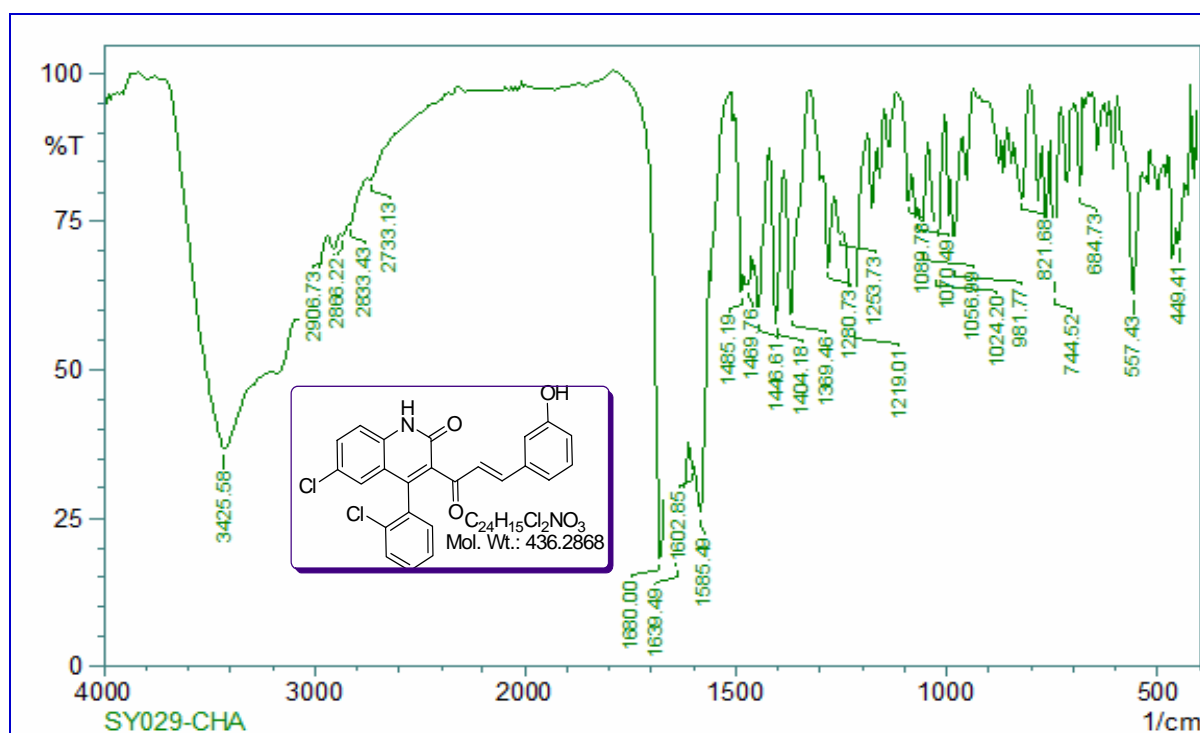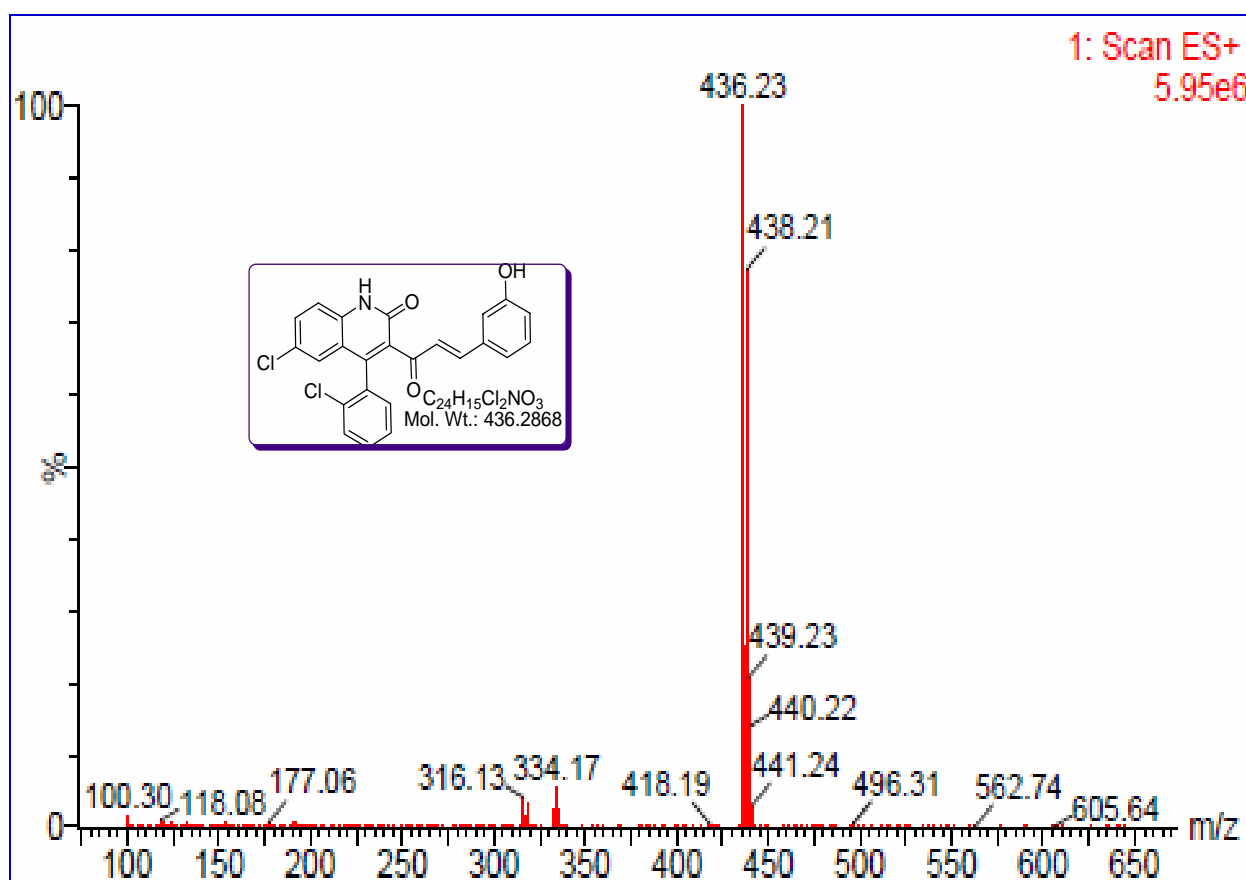

SY030-CHA

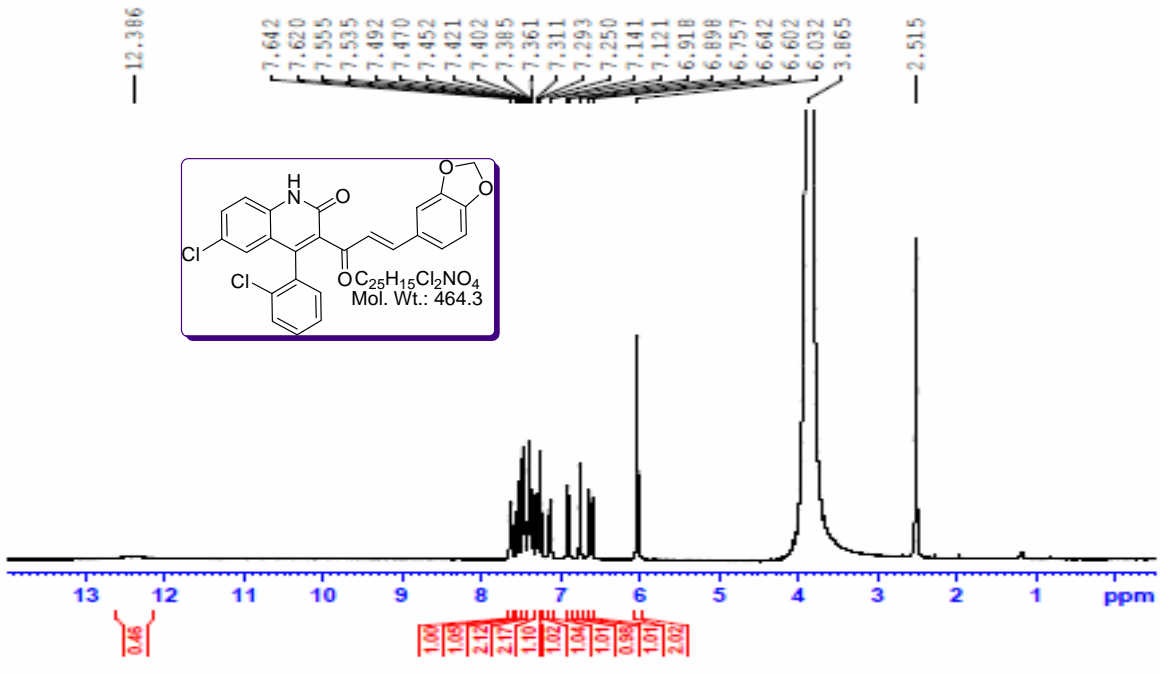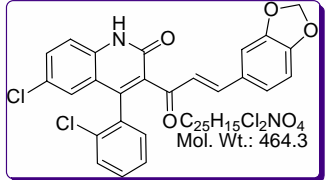

SY030-CHA

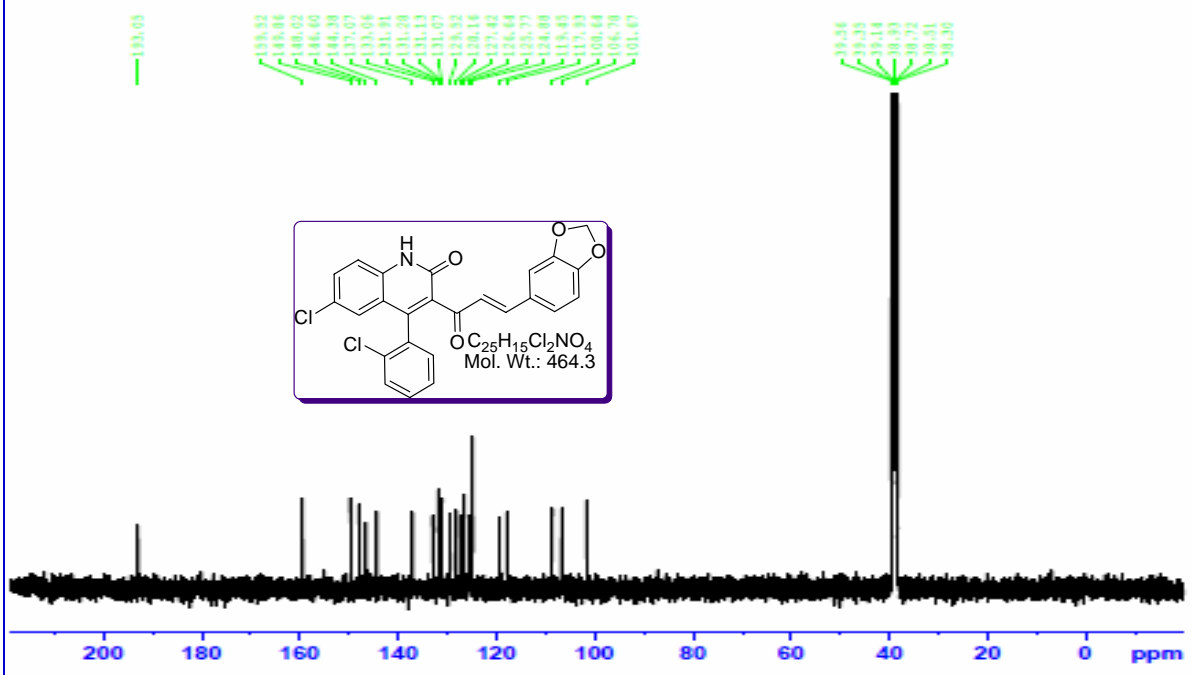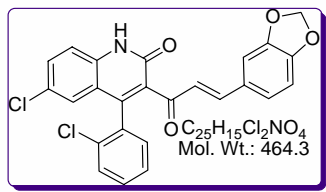

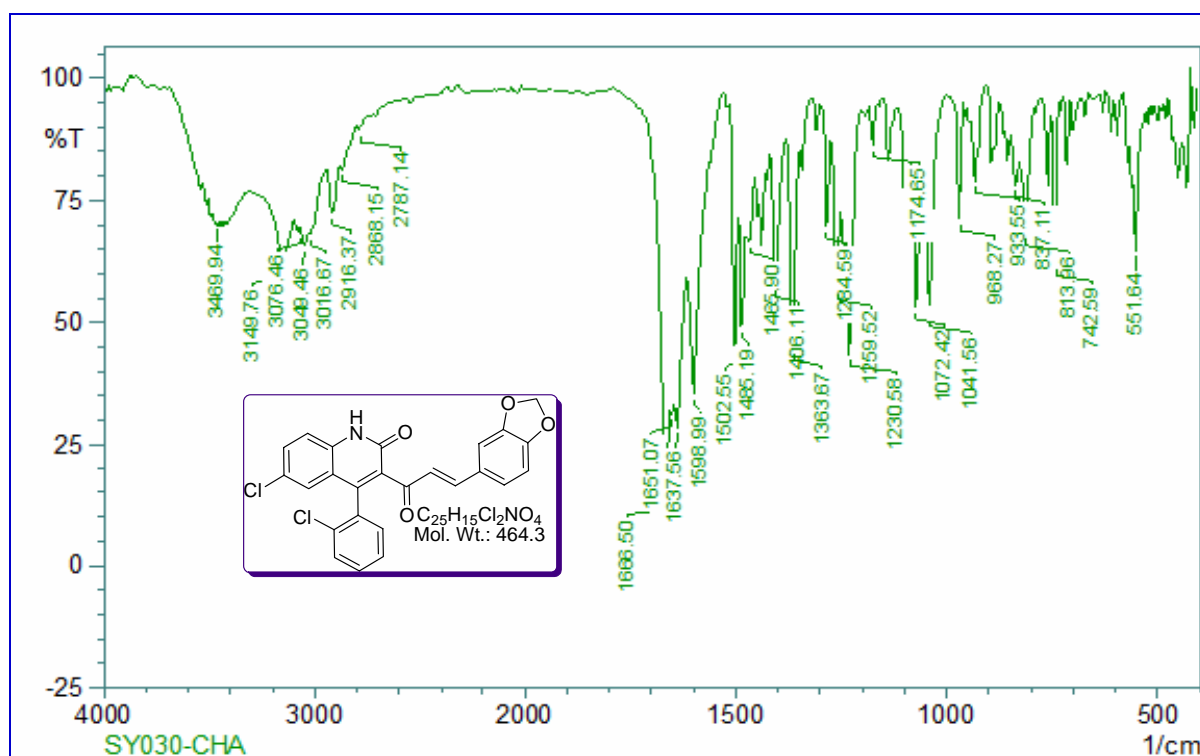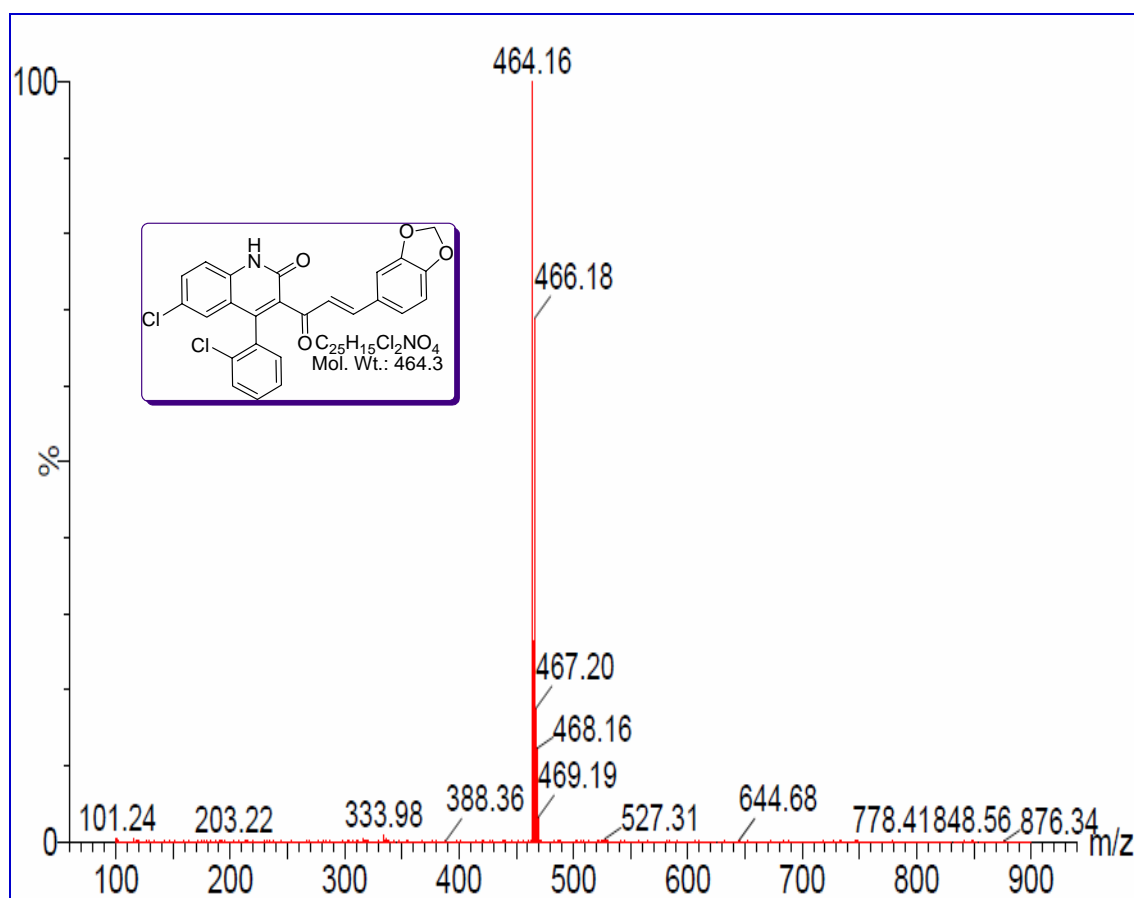

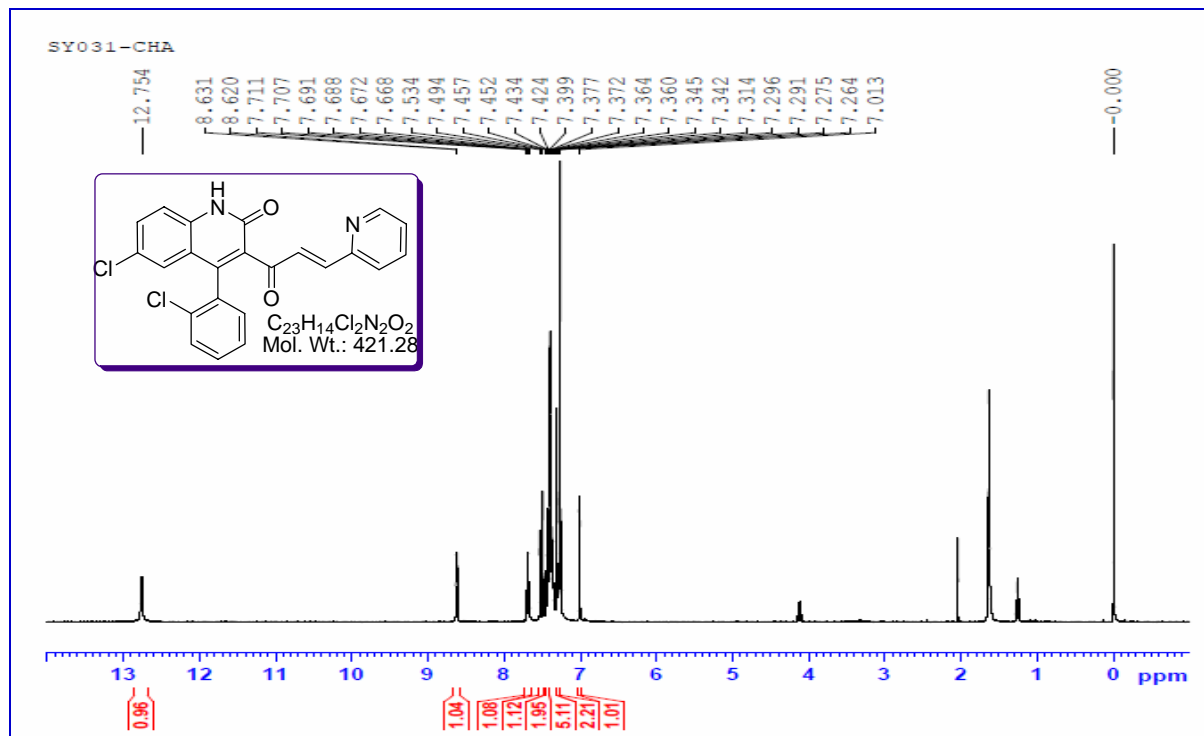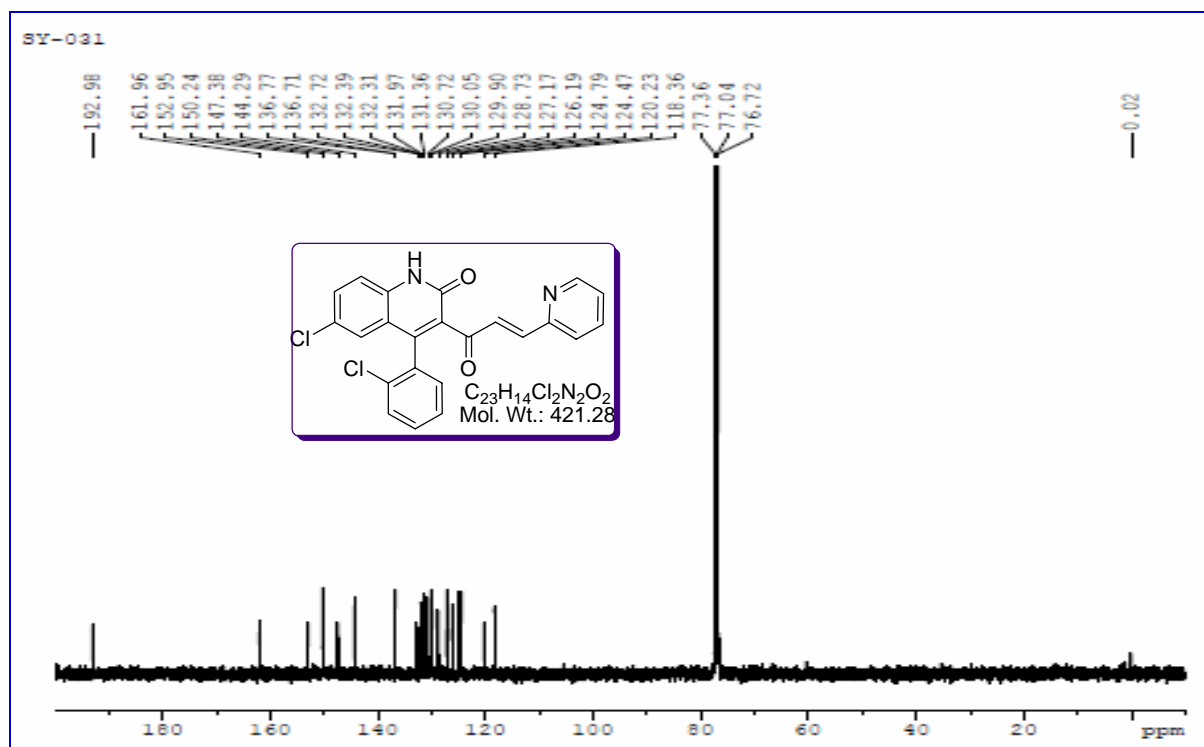

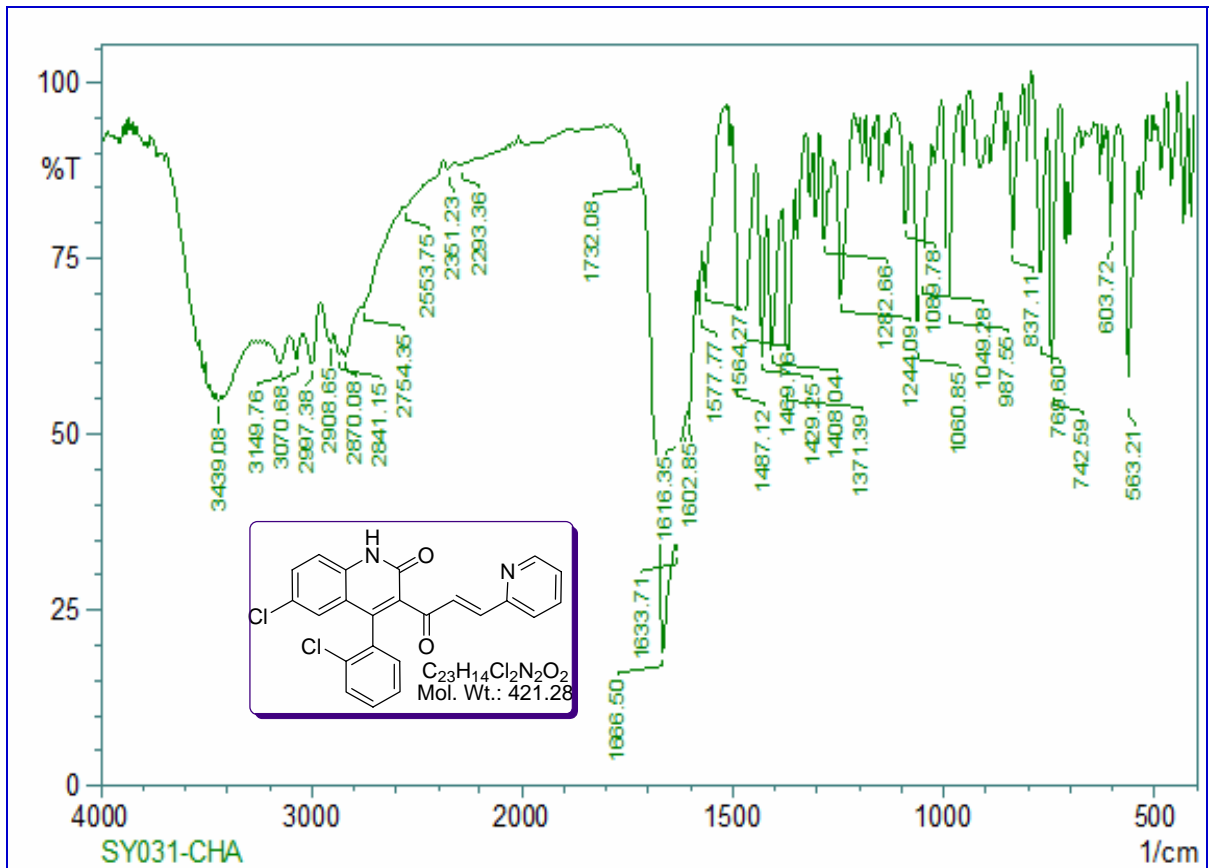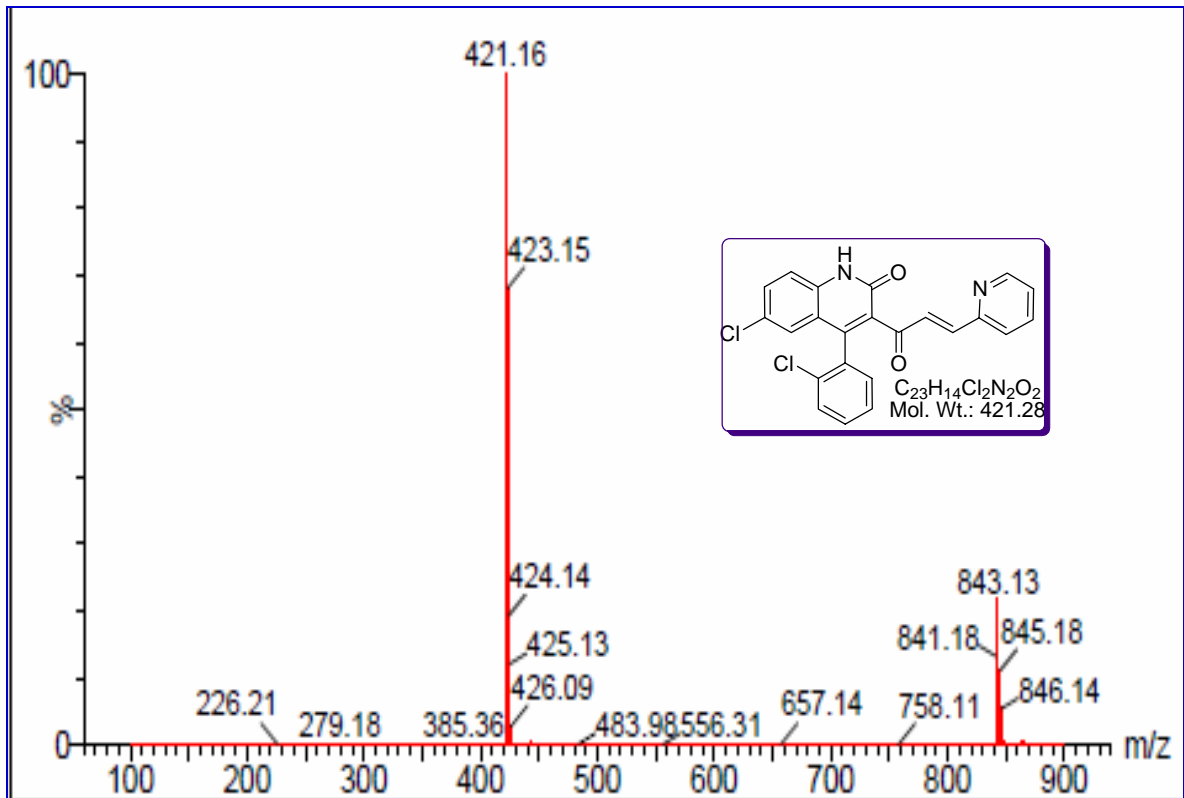

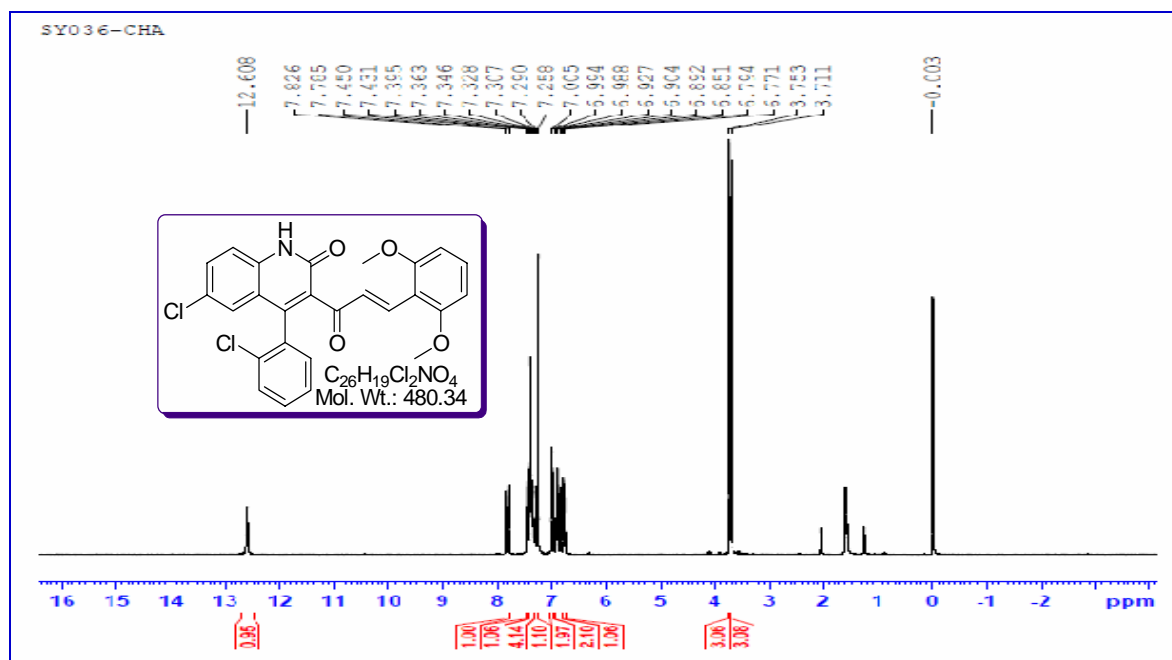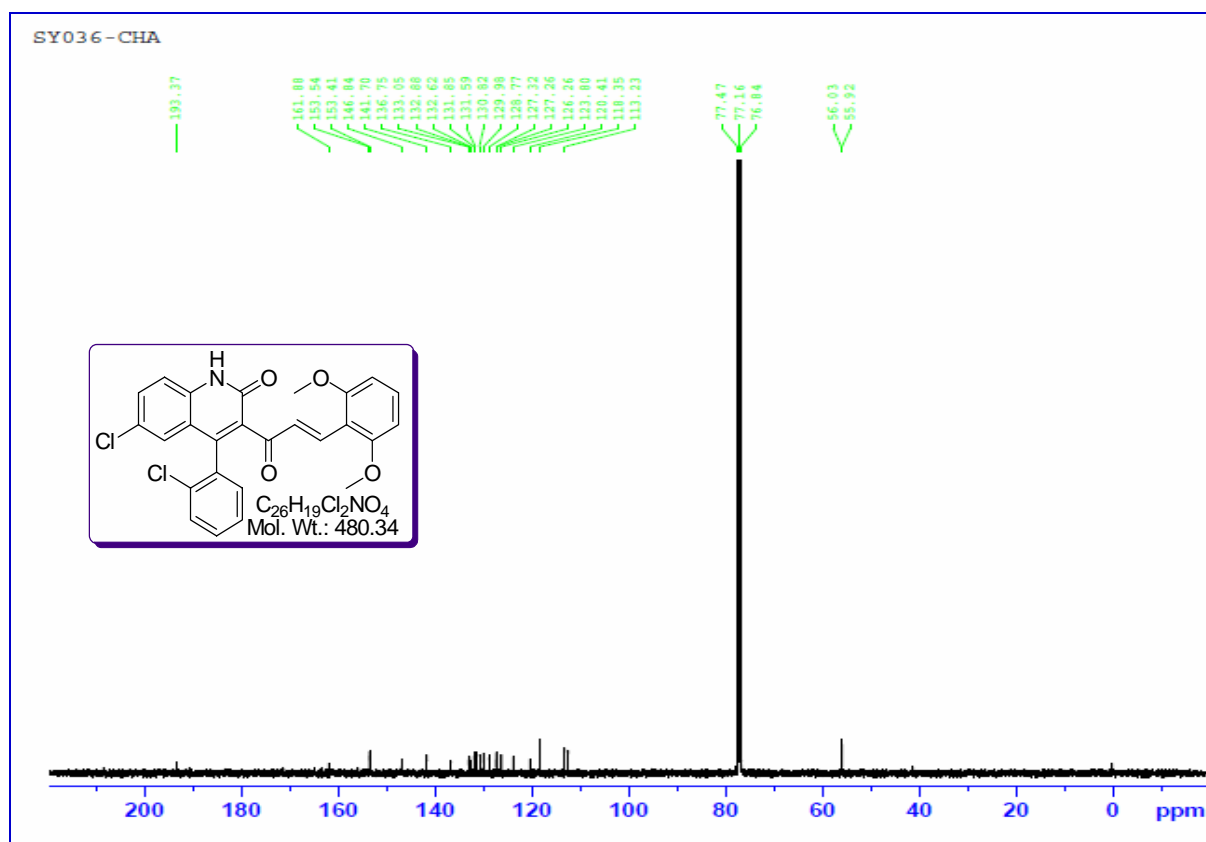

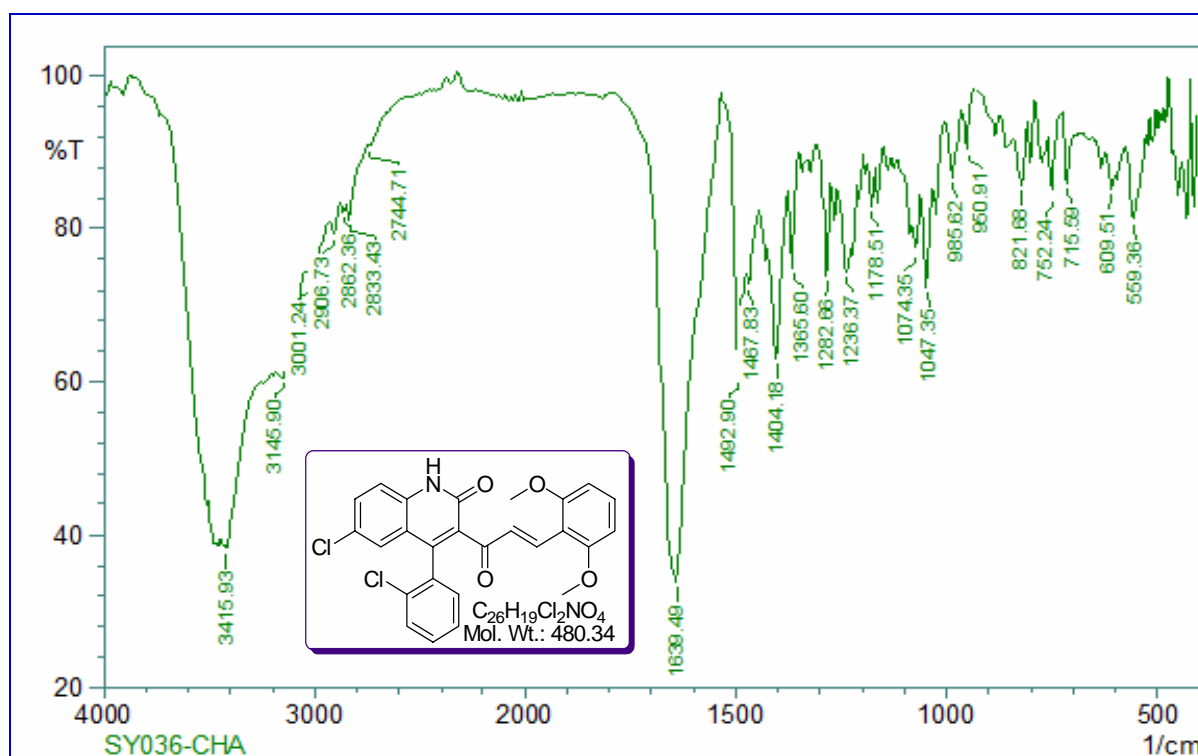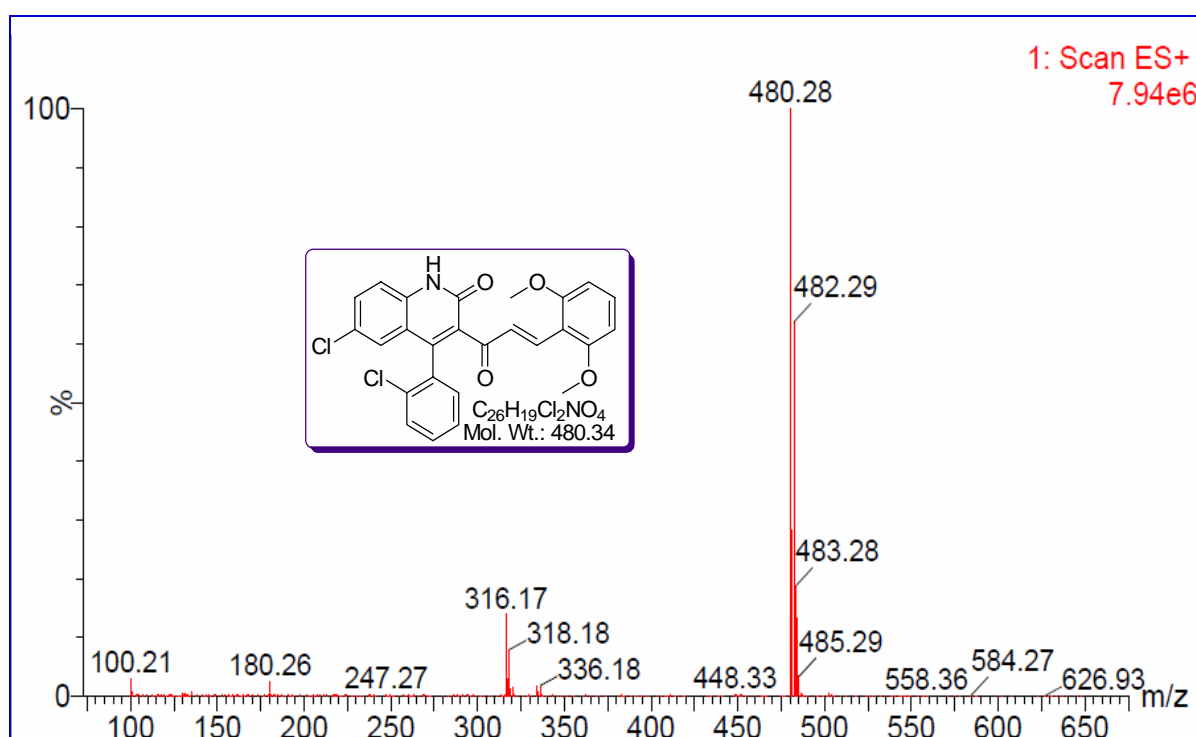



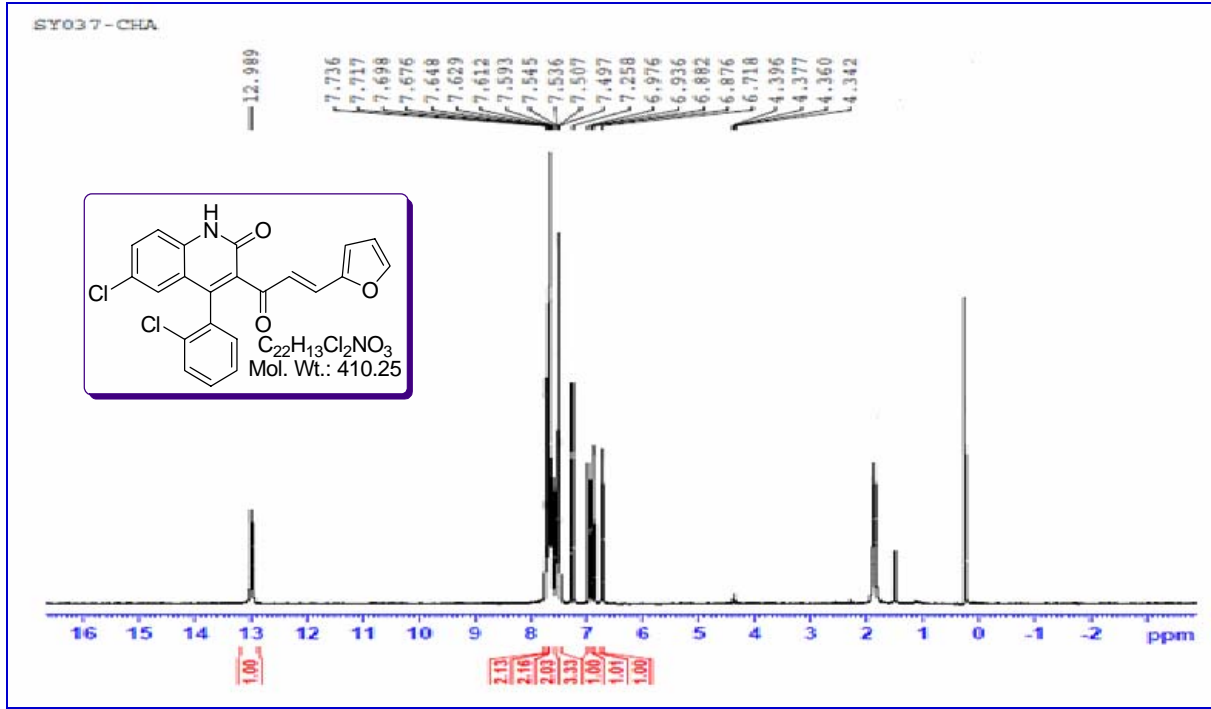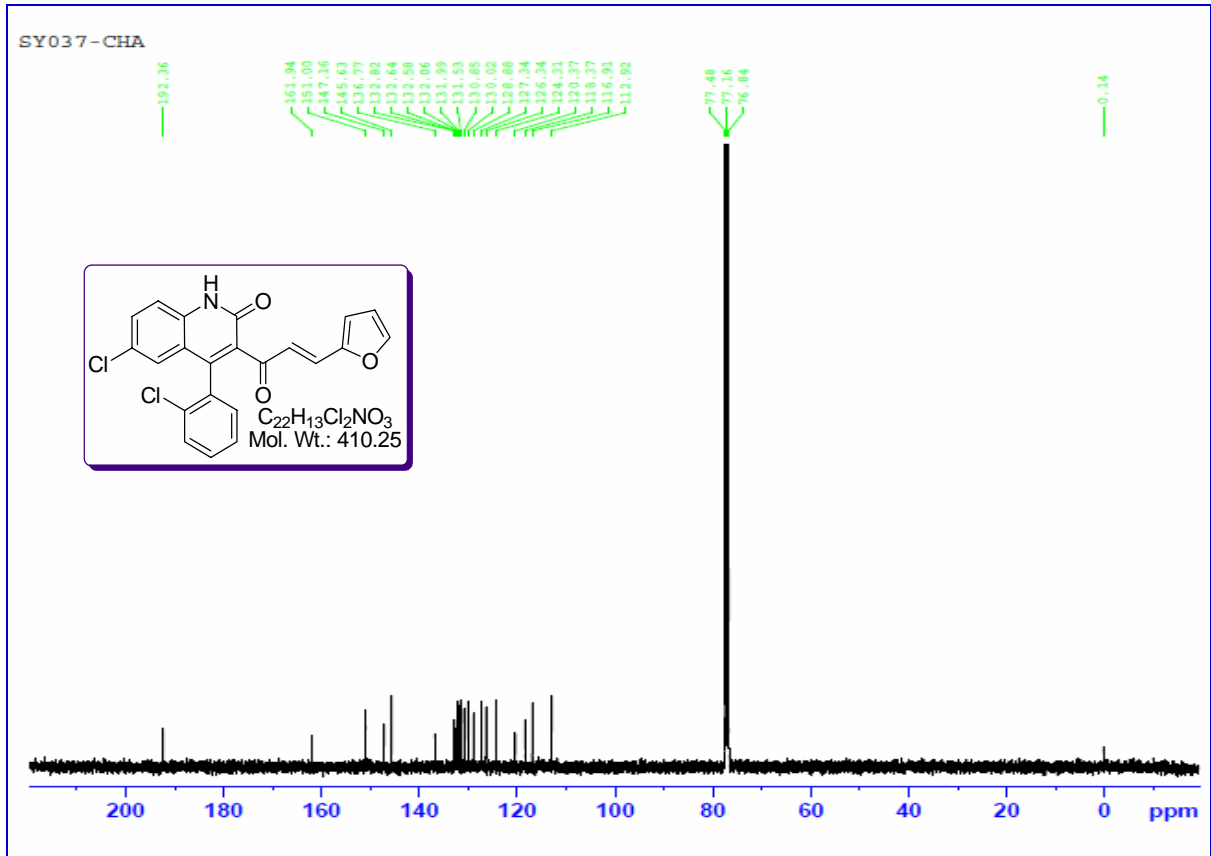

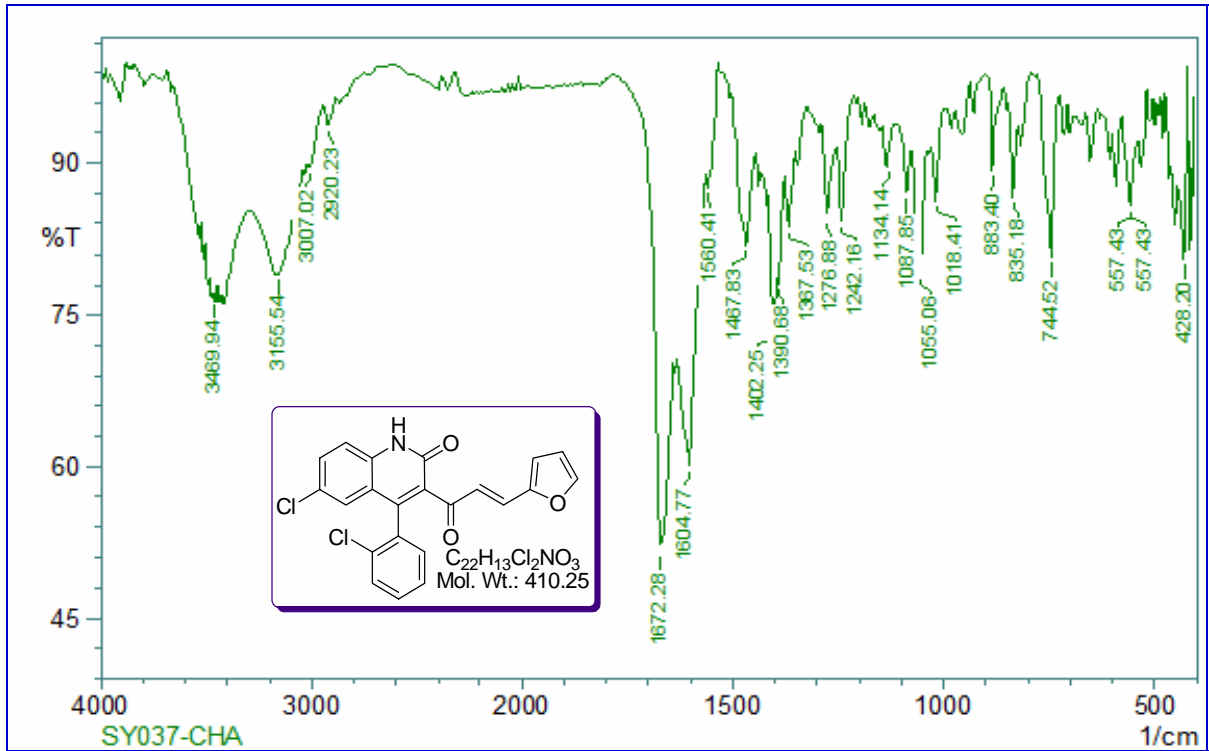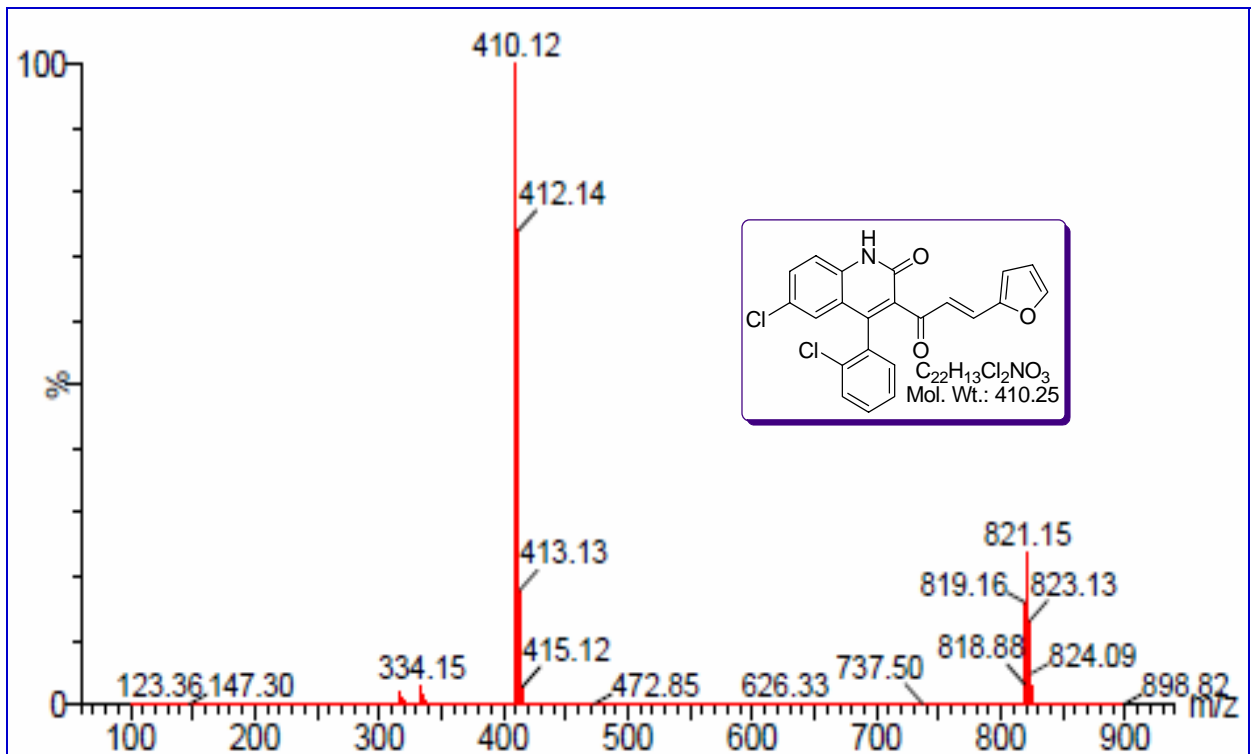

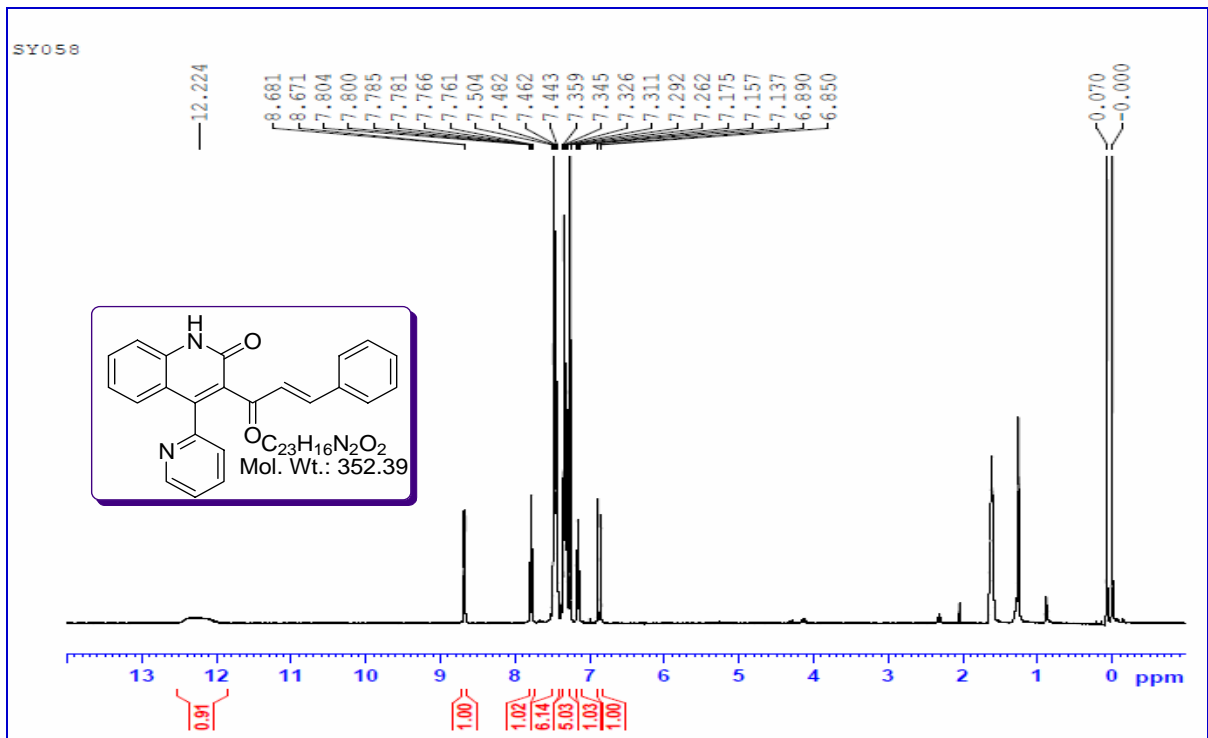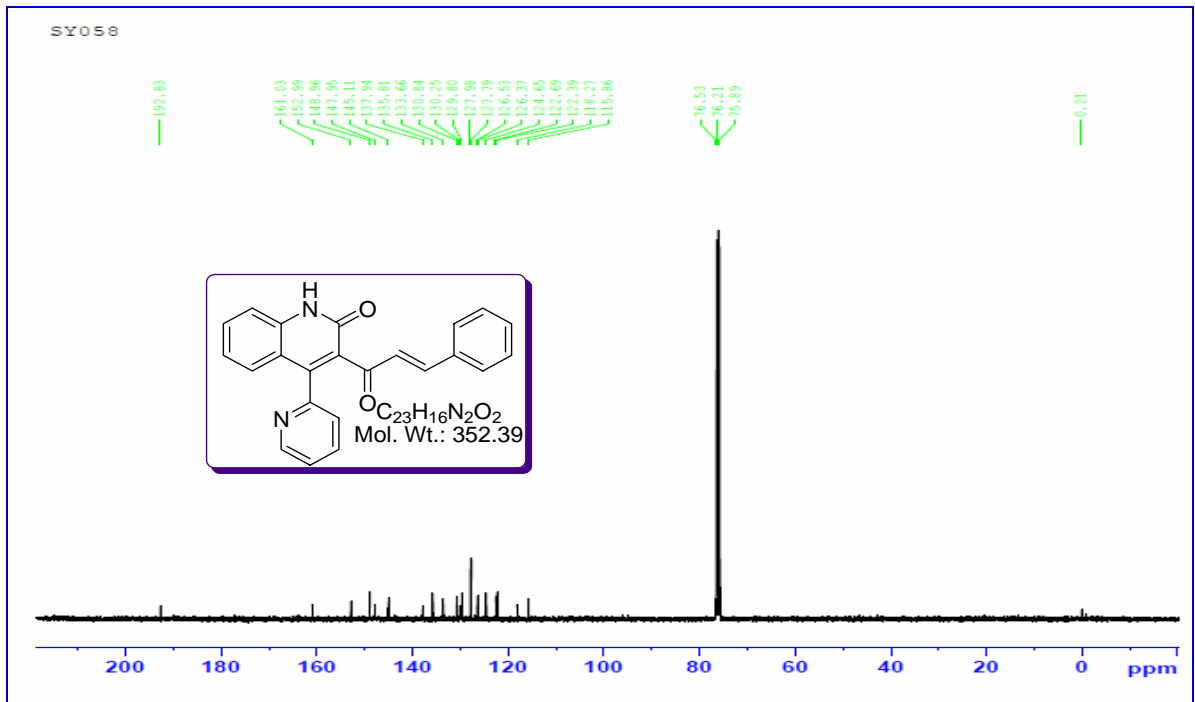

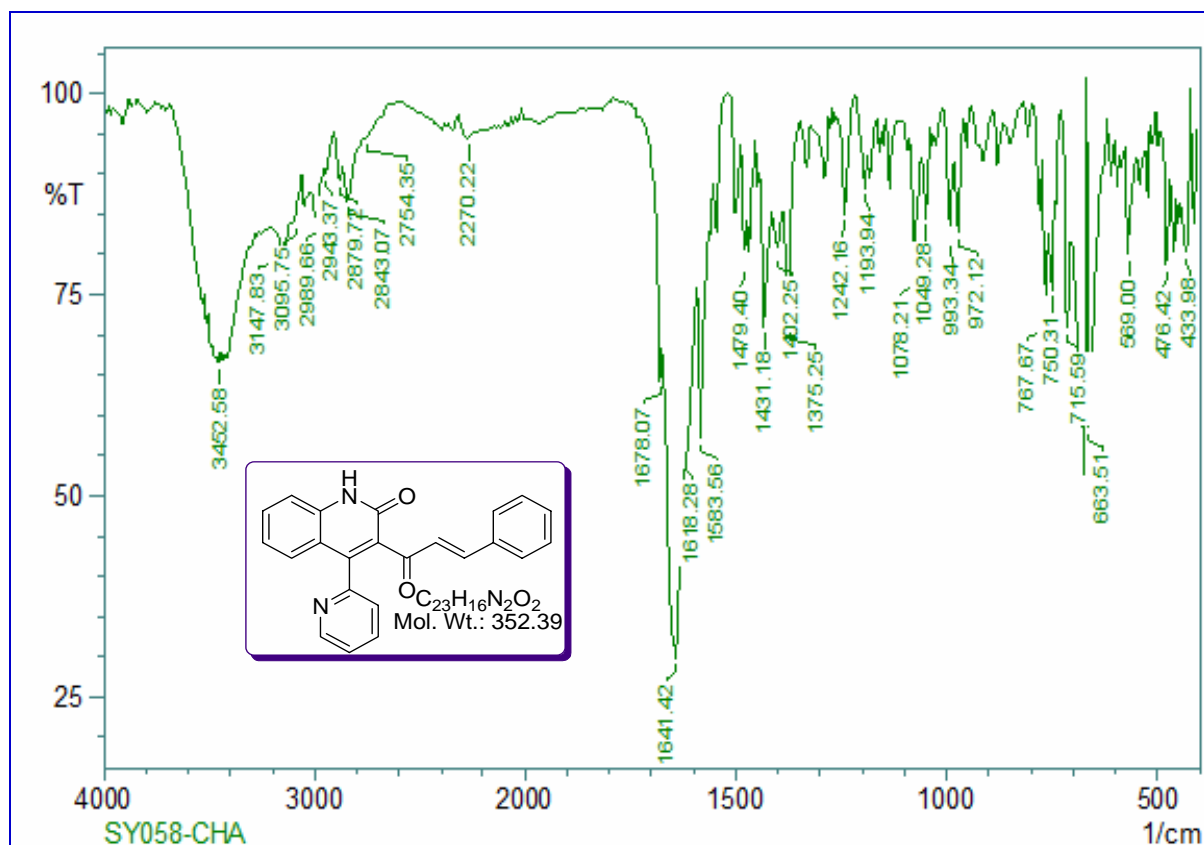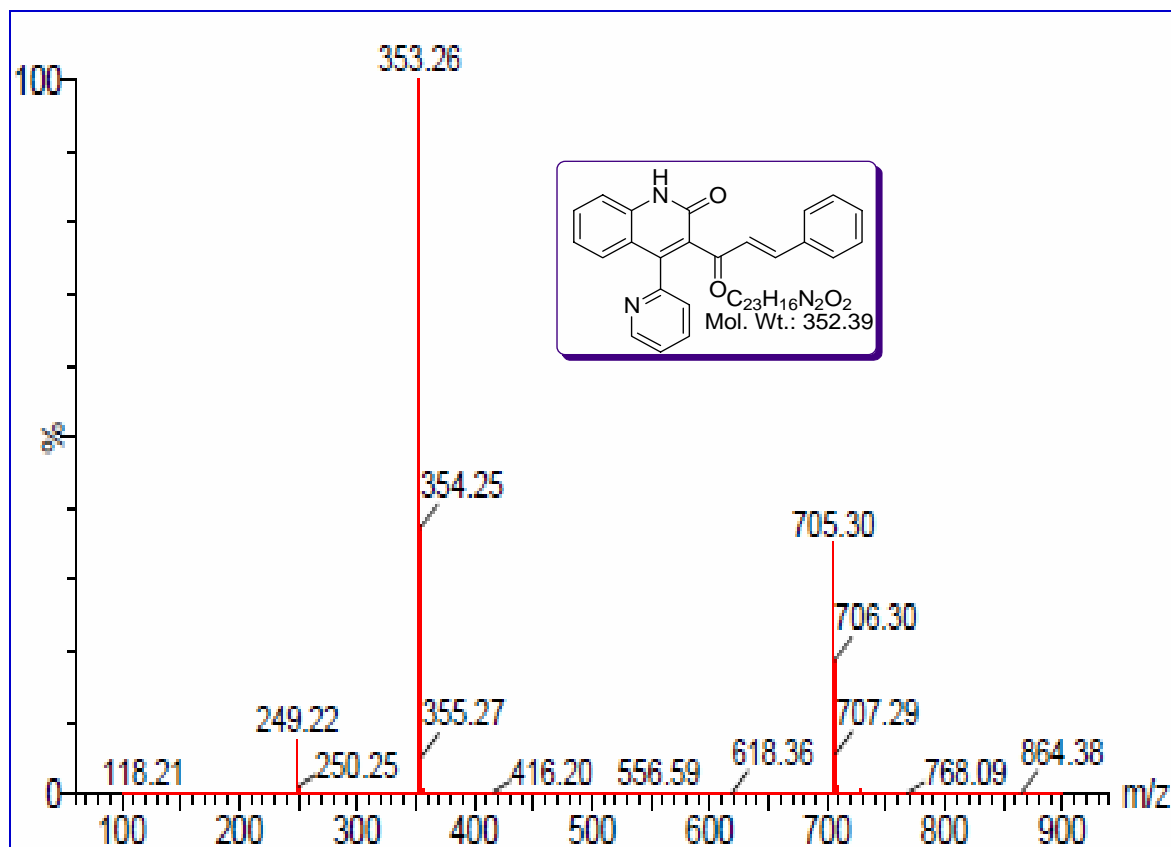

SY059

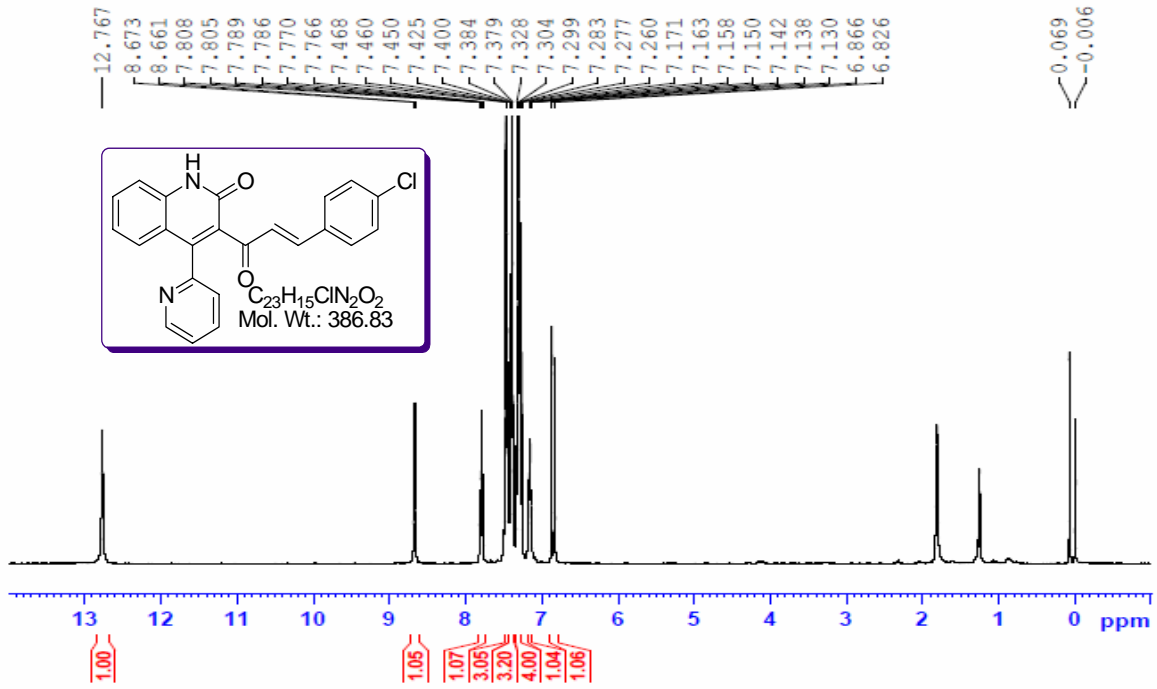

SY059

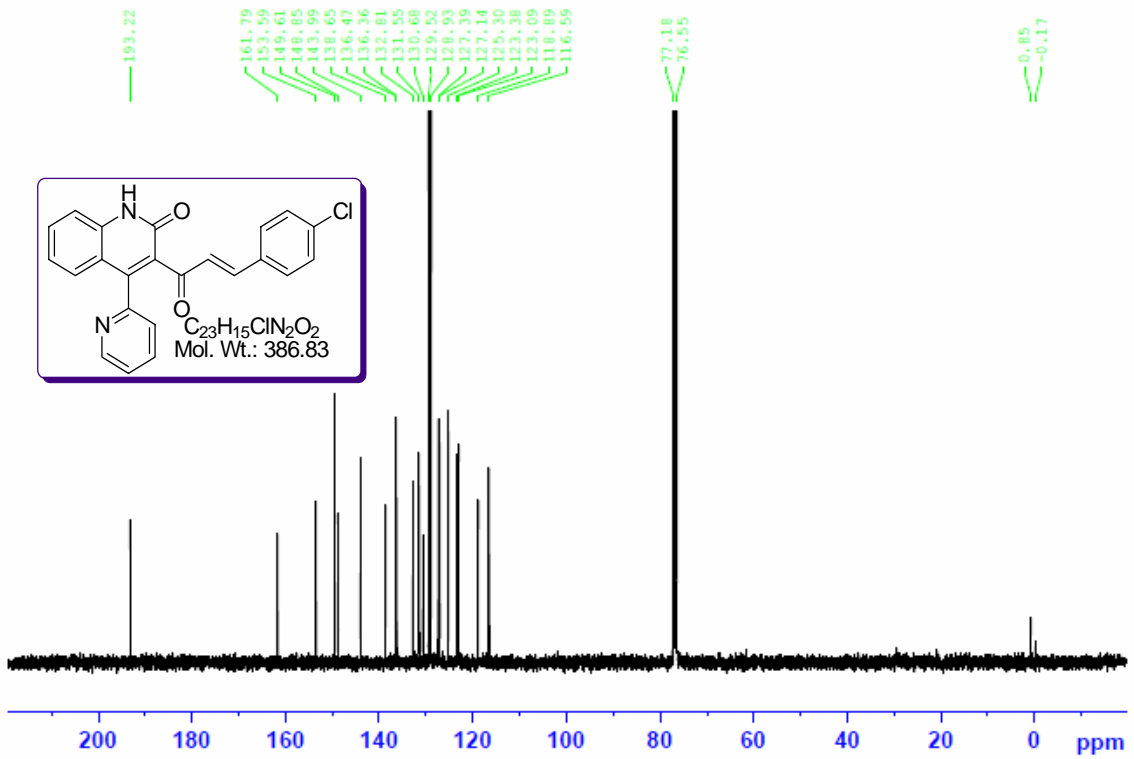

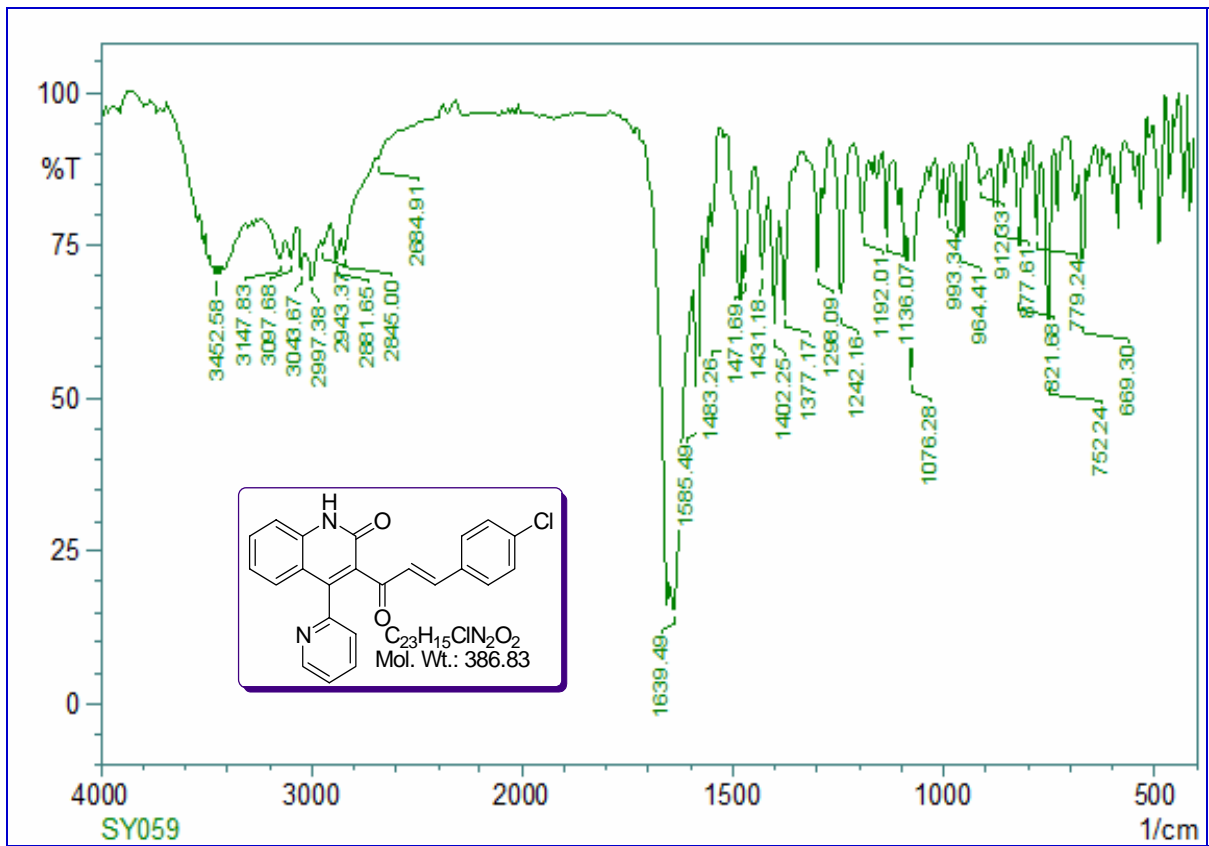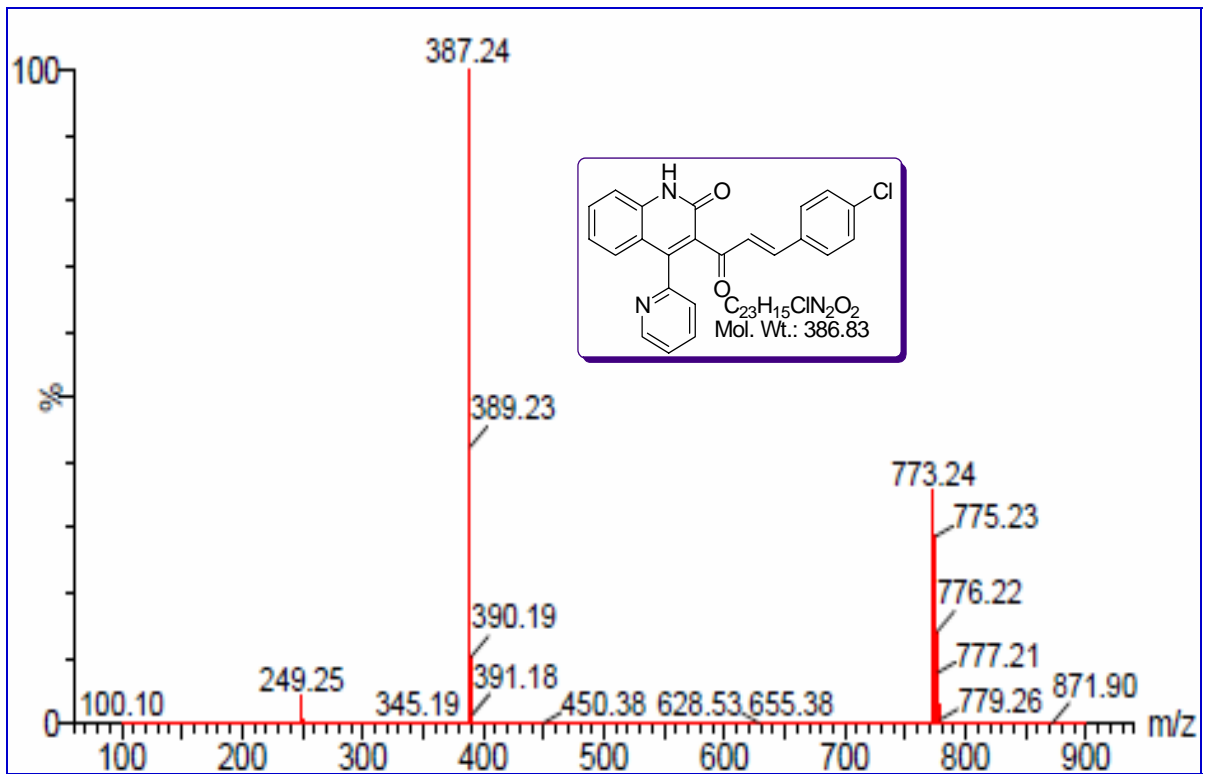

SY060

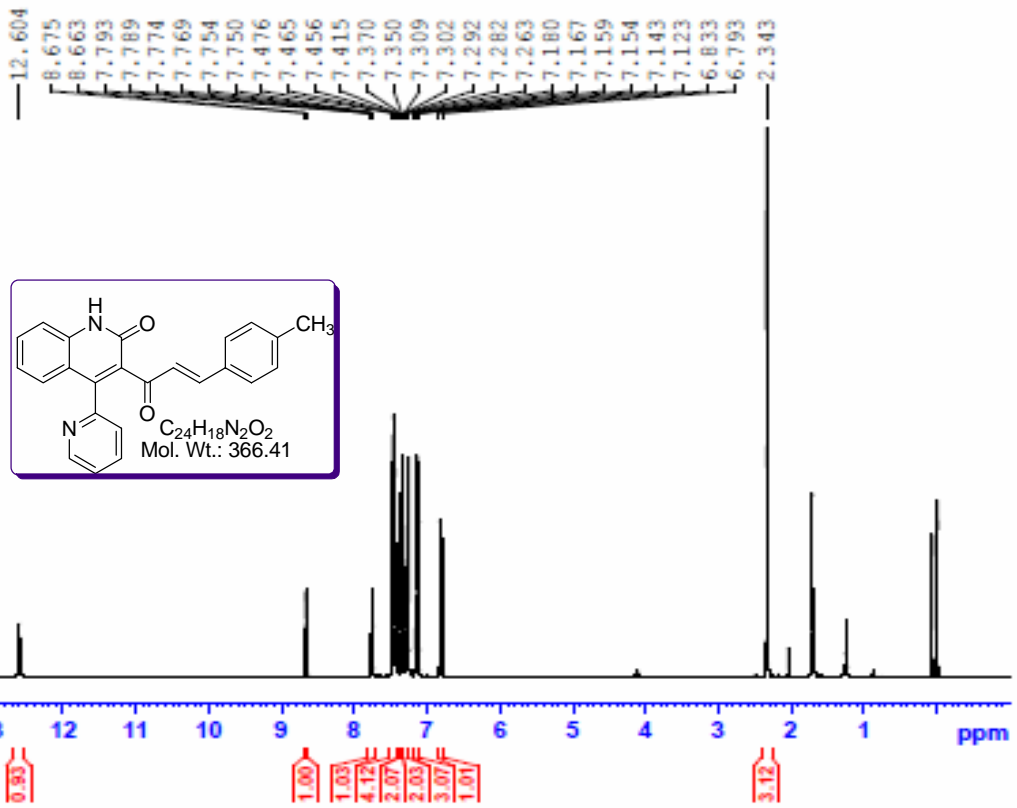

SY060

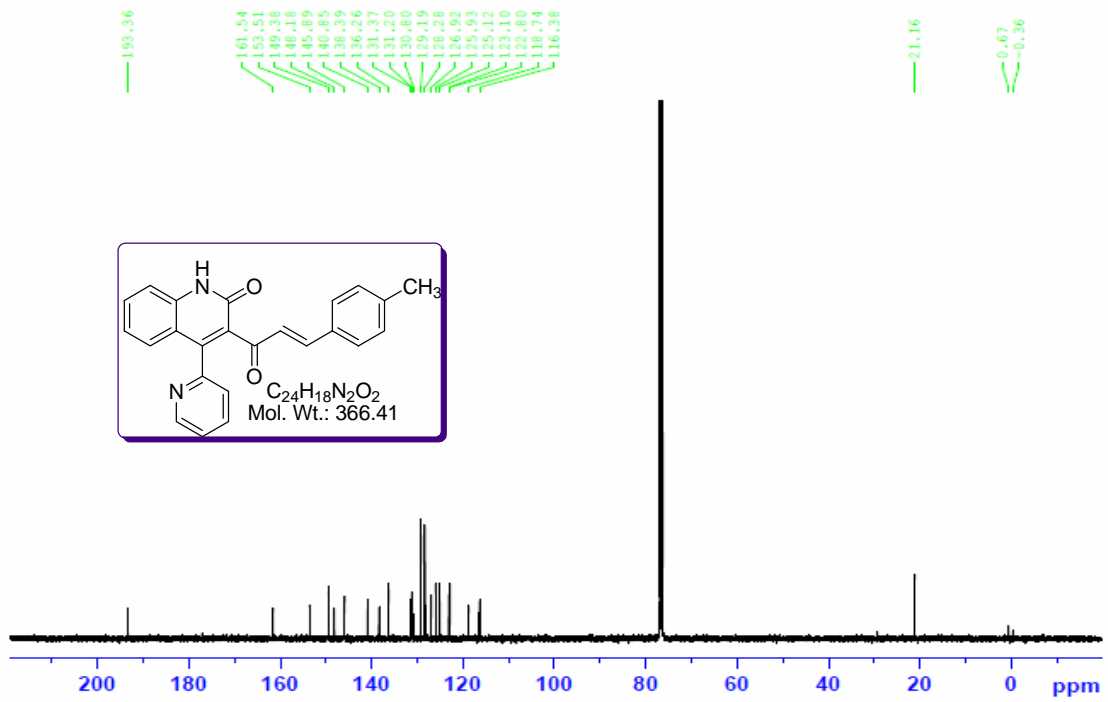

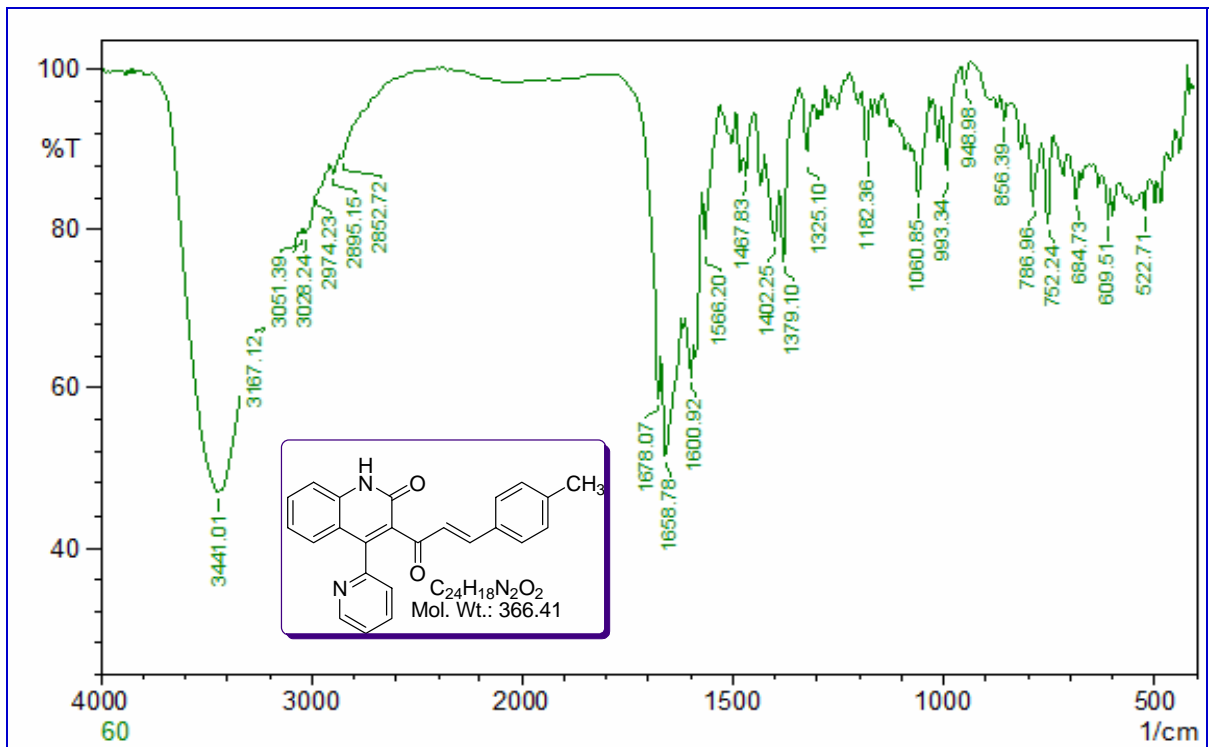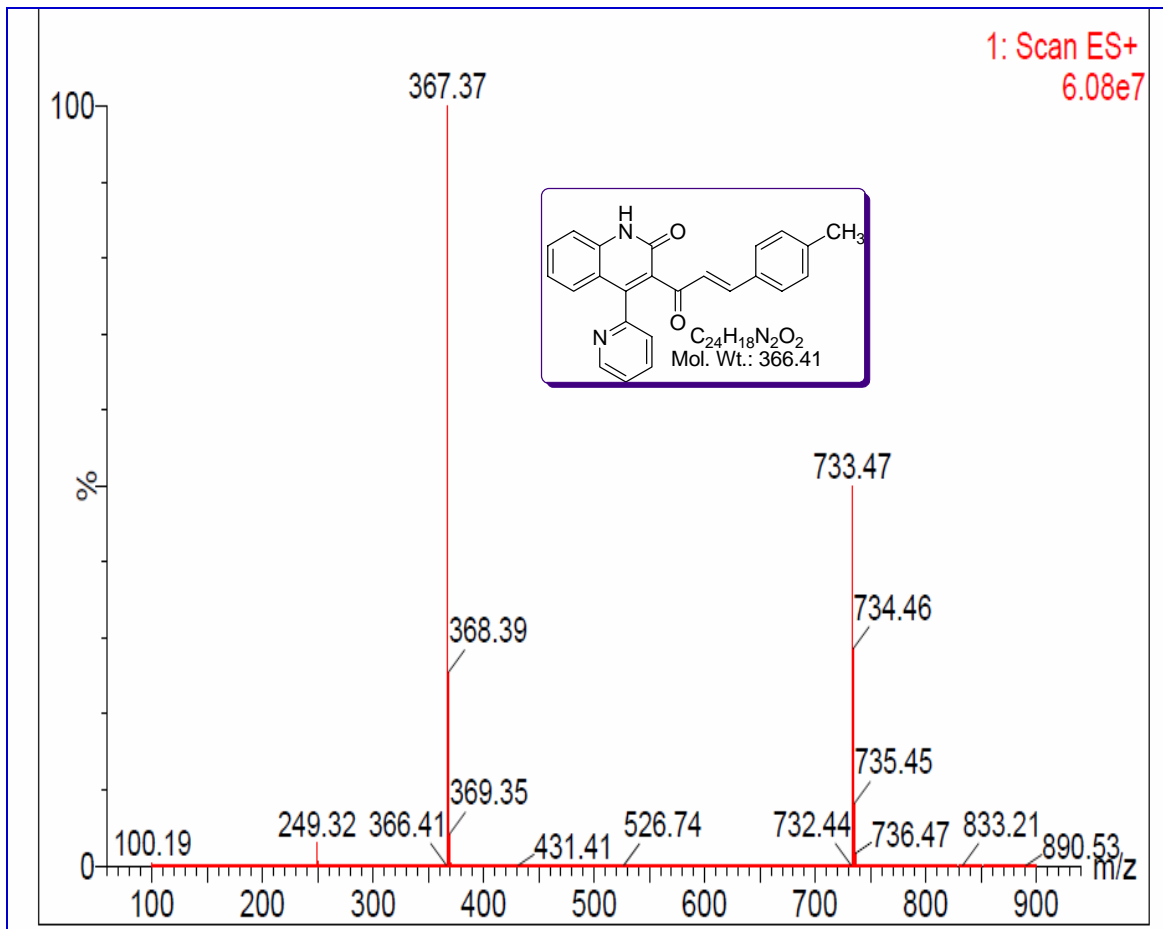



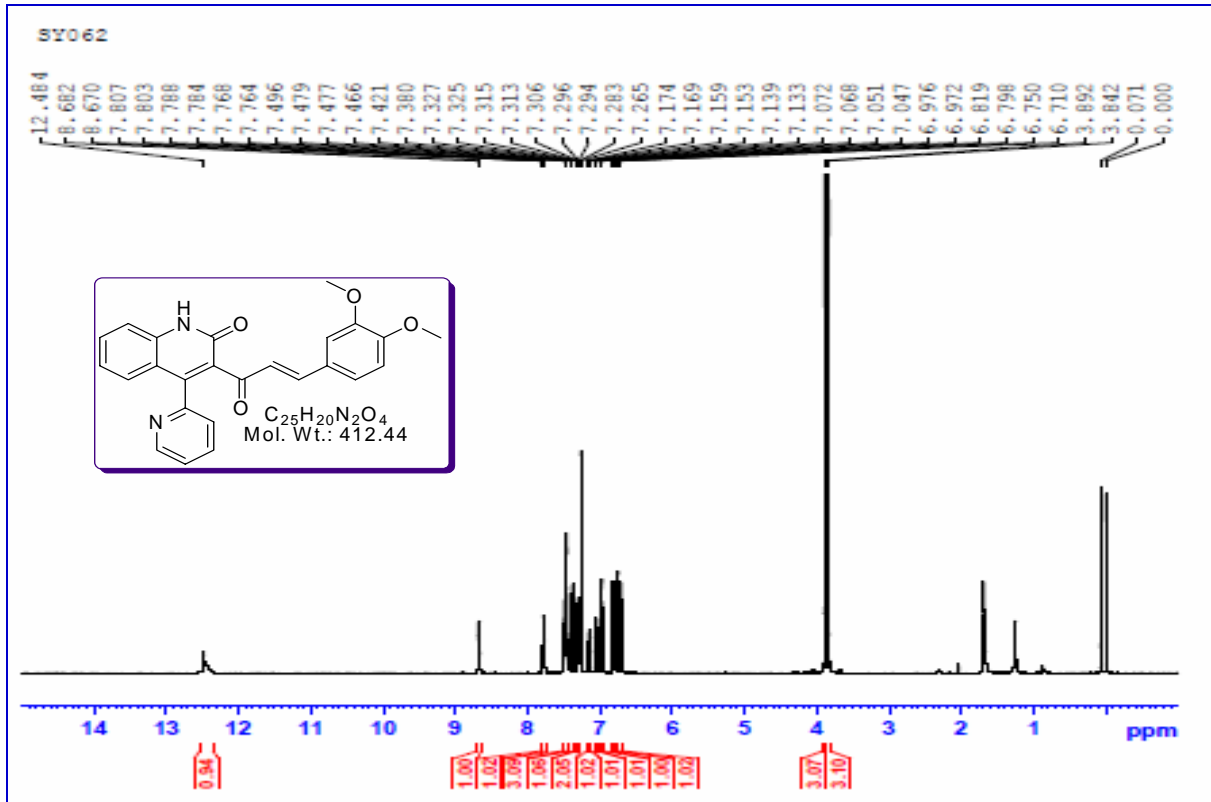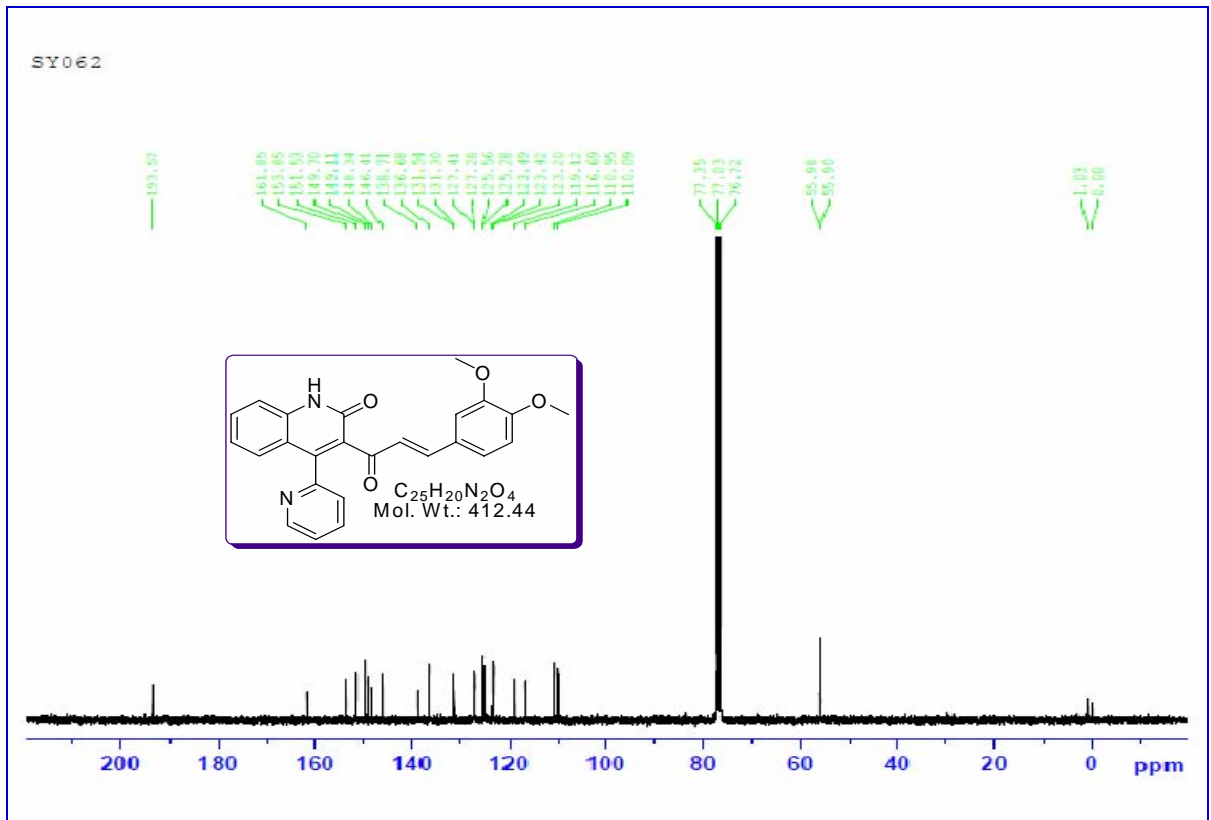

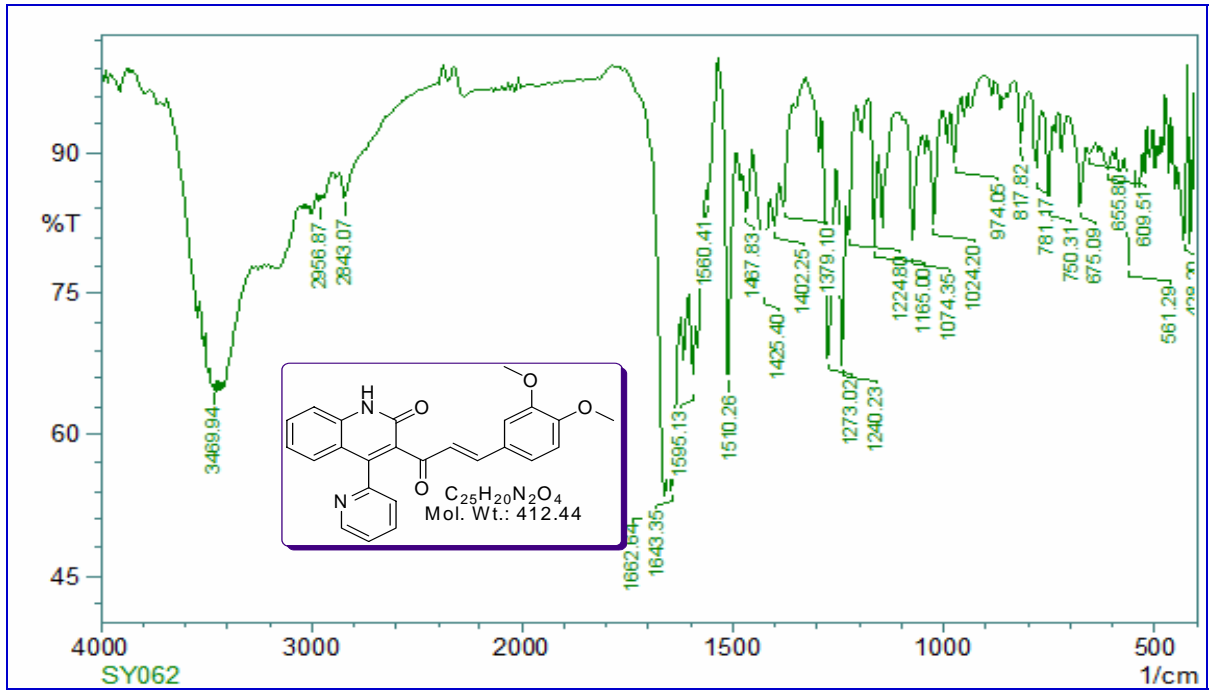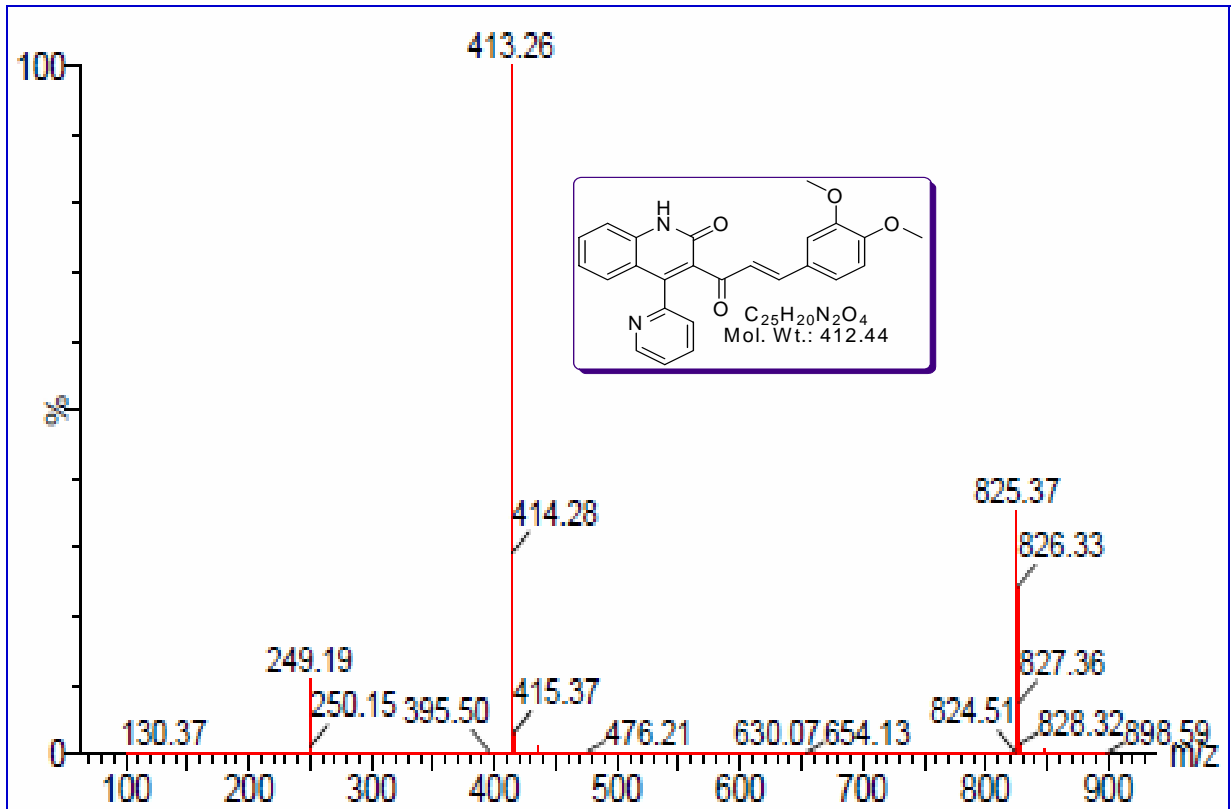

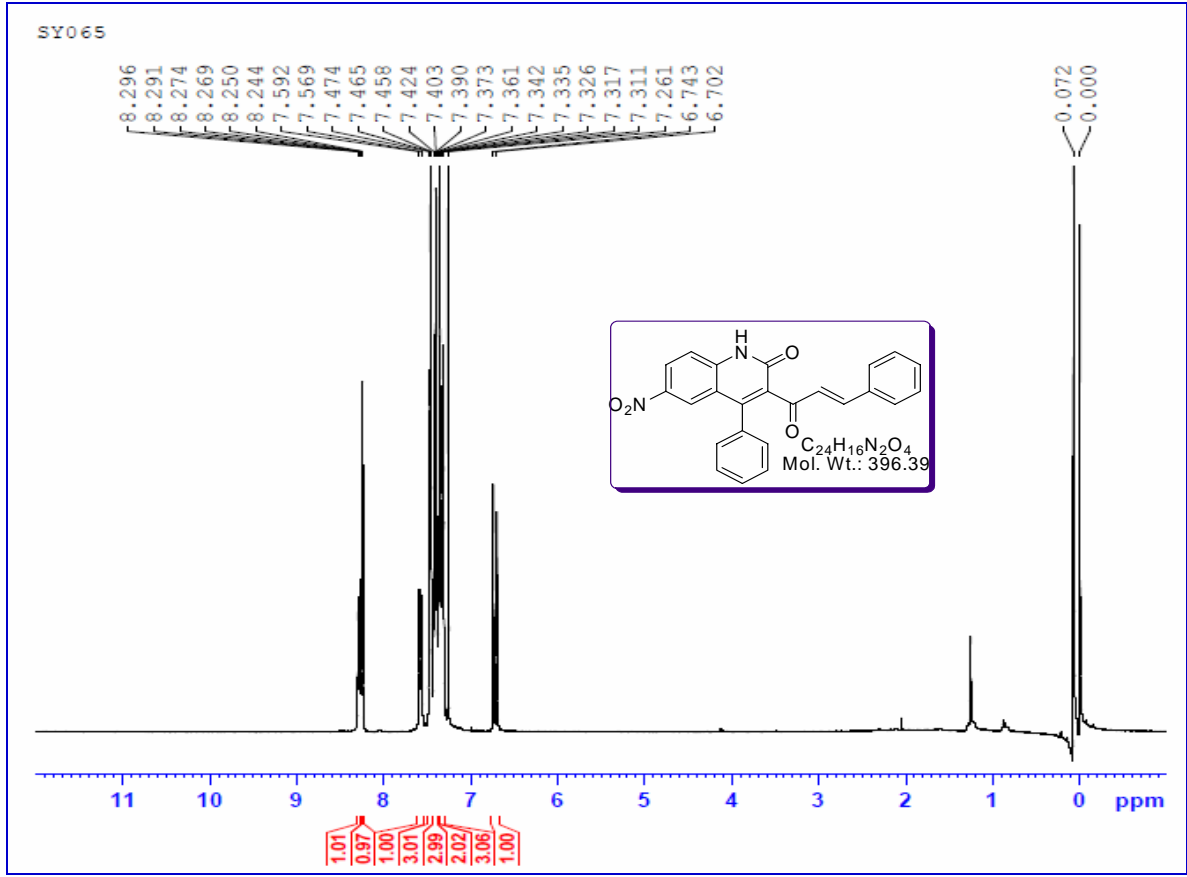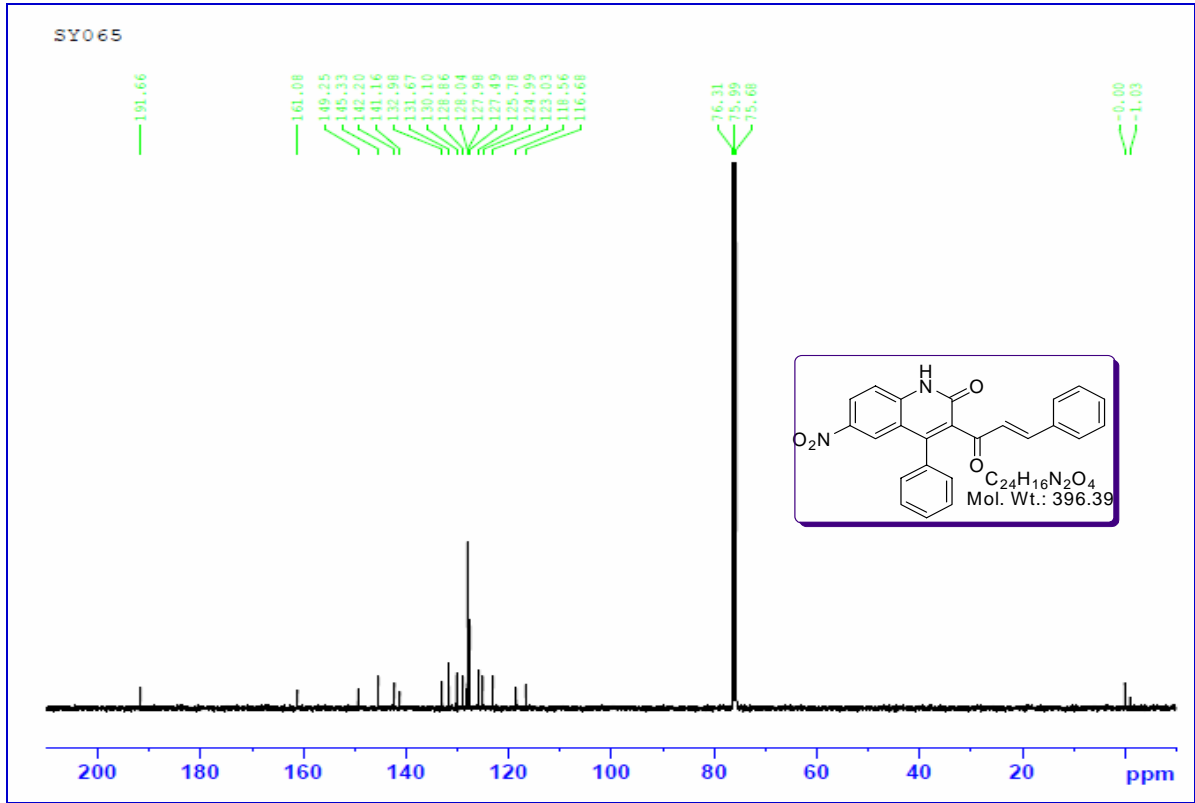

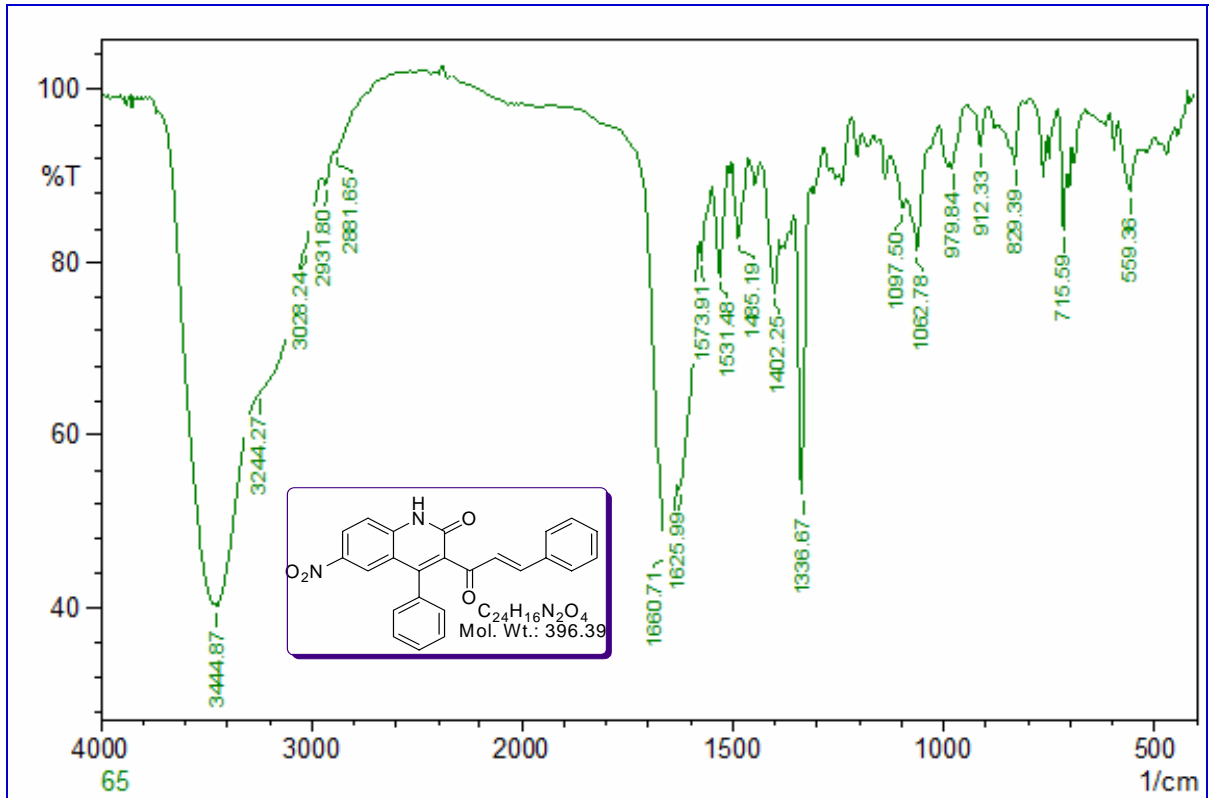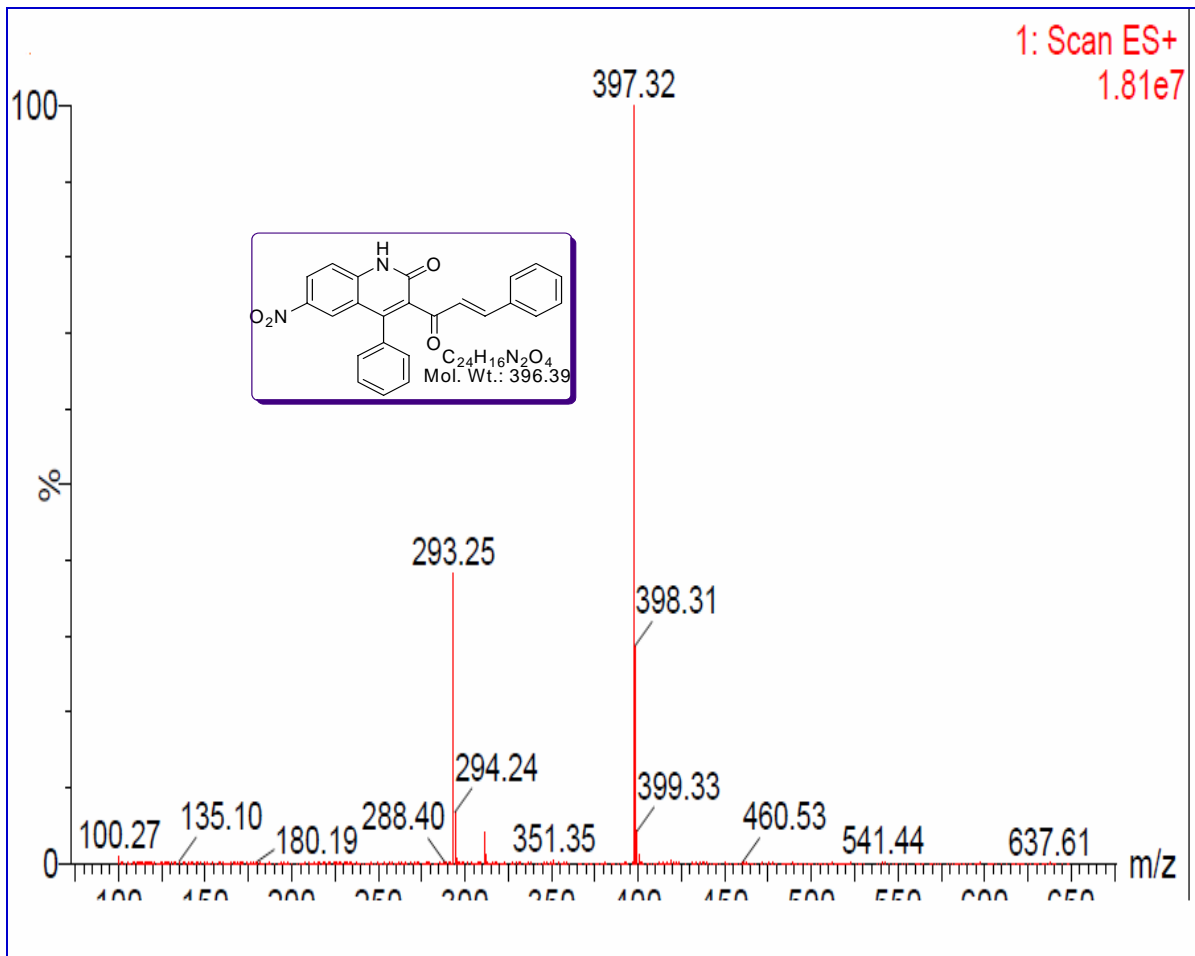

SY066

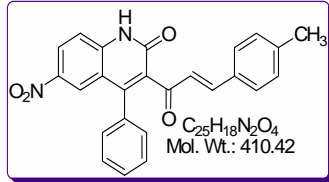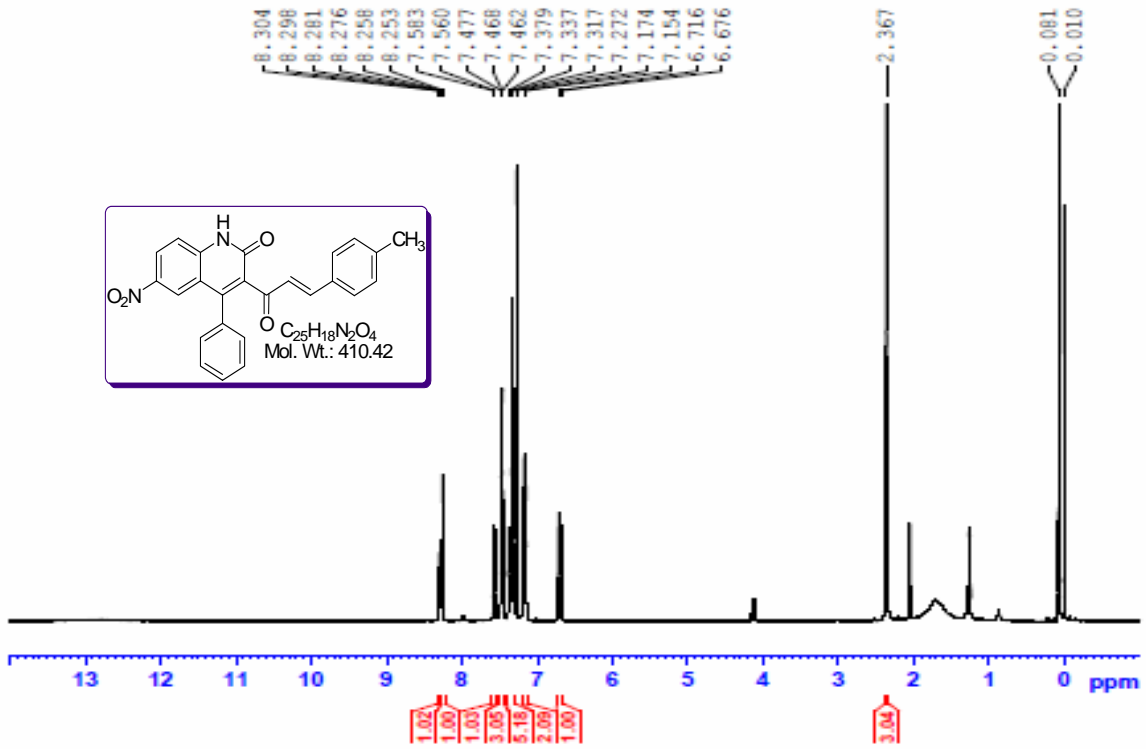

SY066

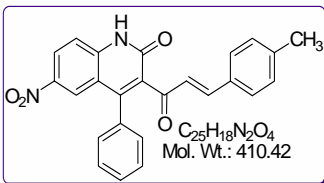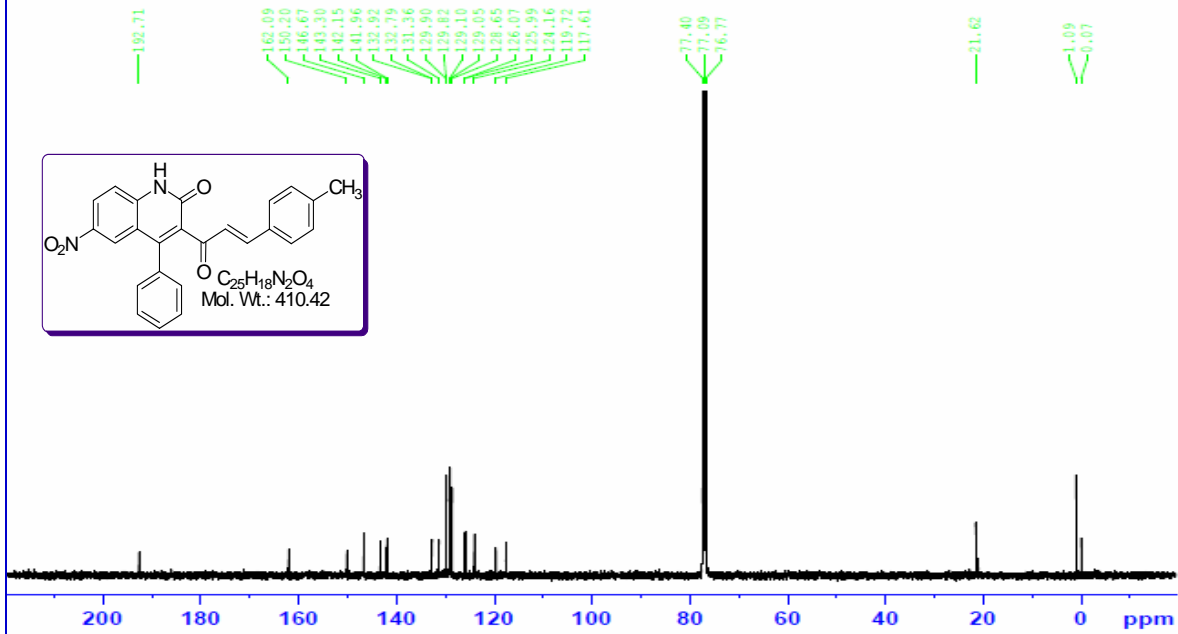

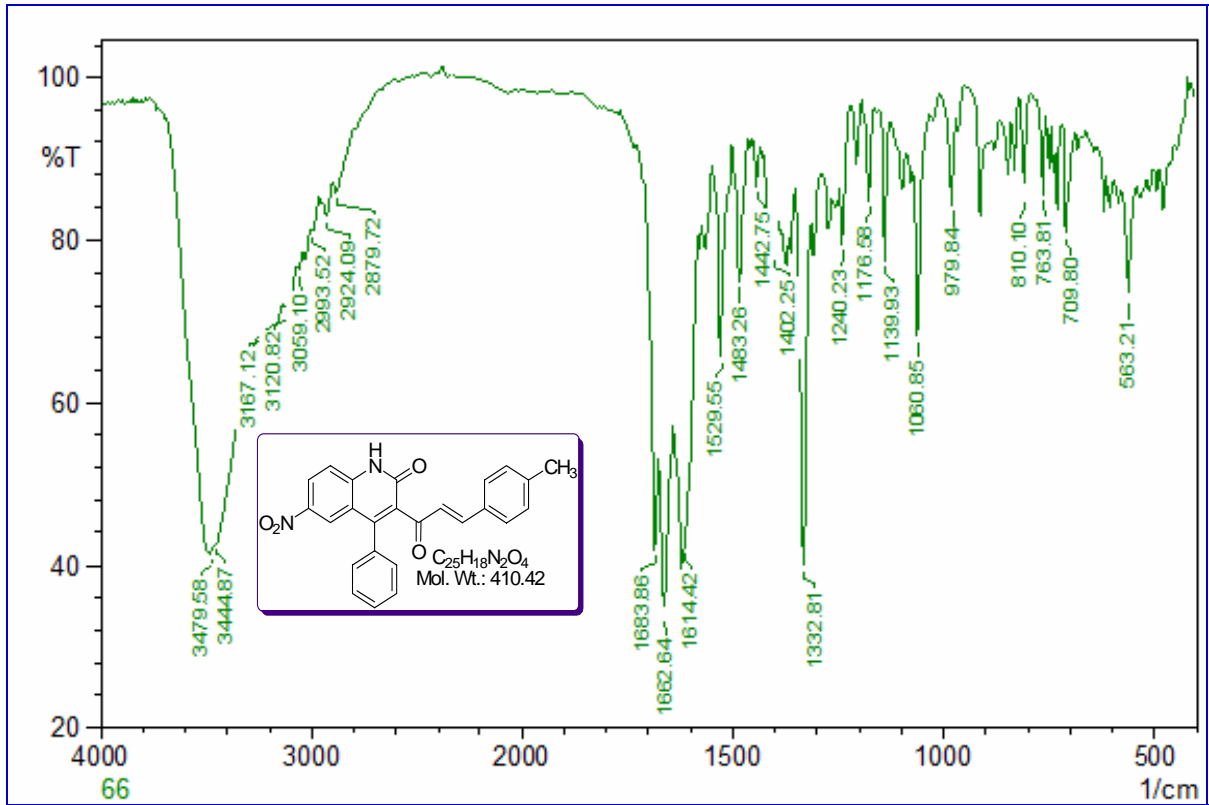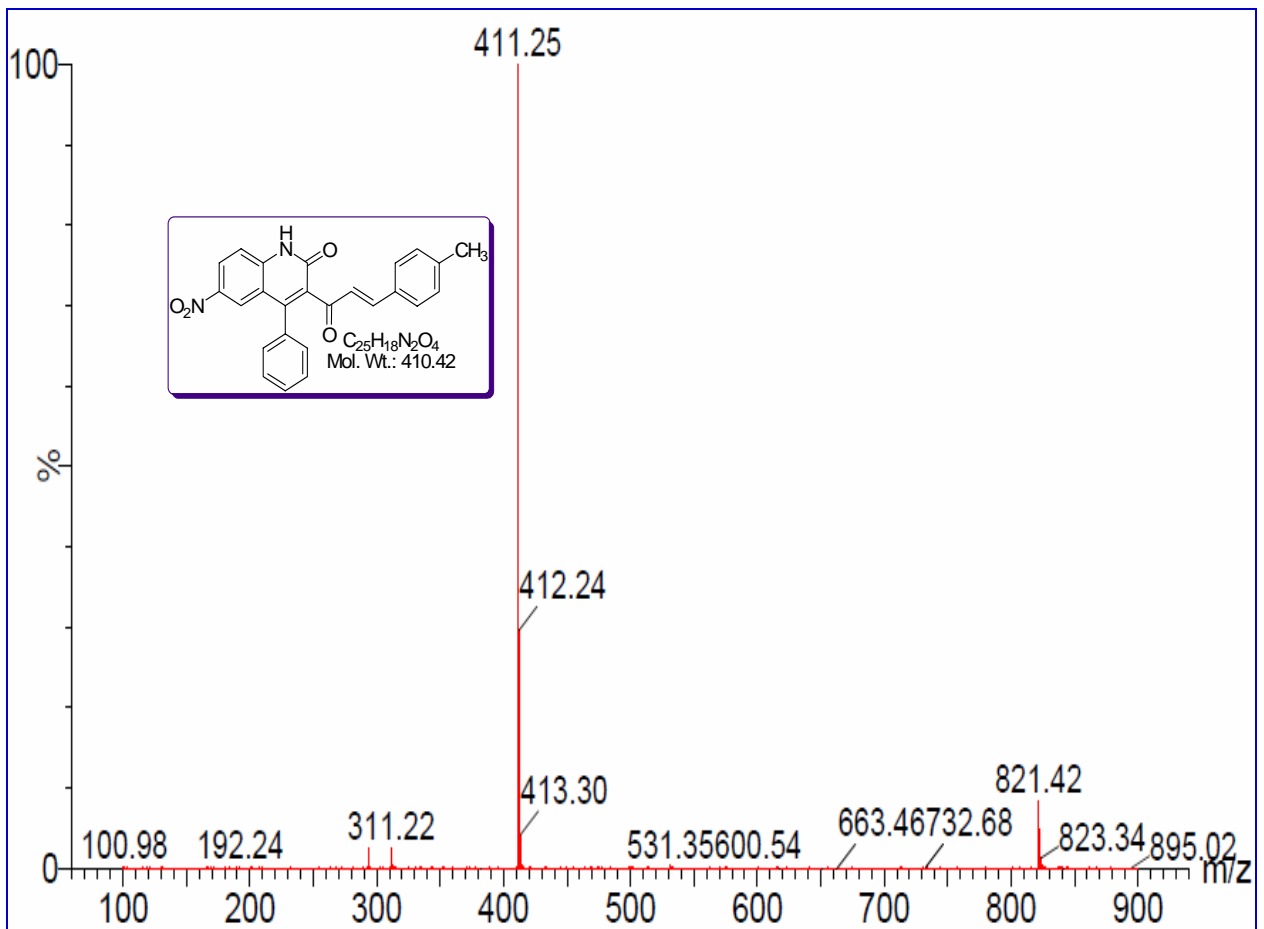

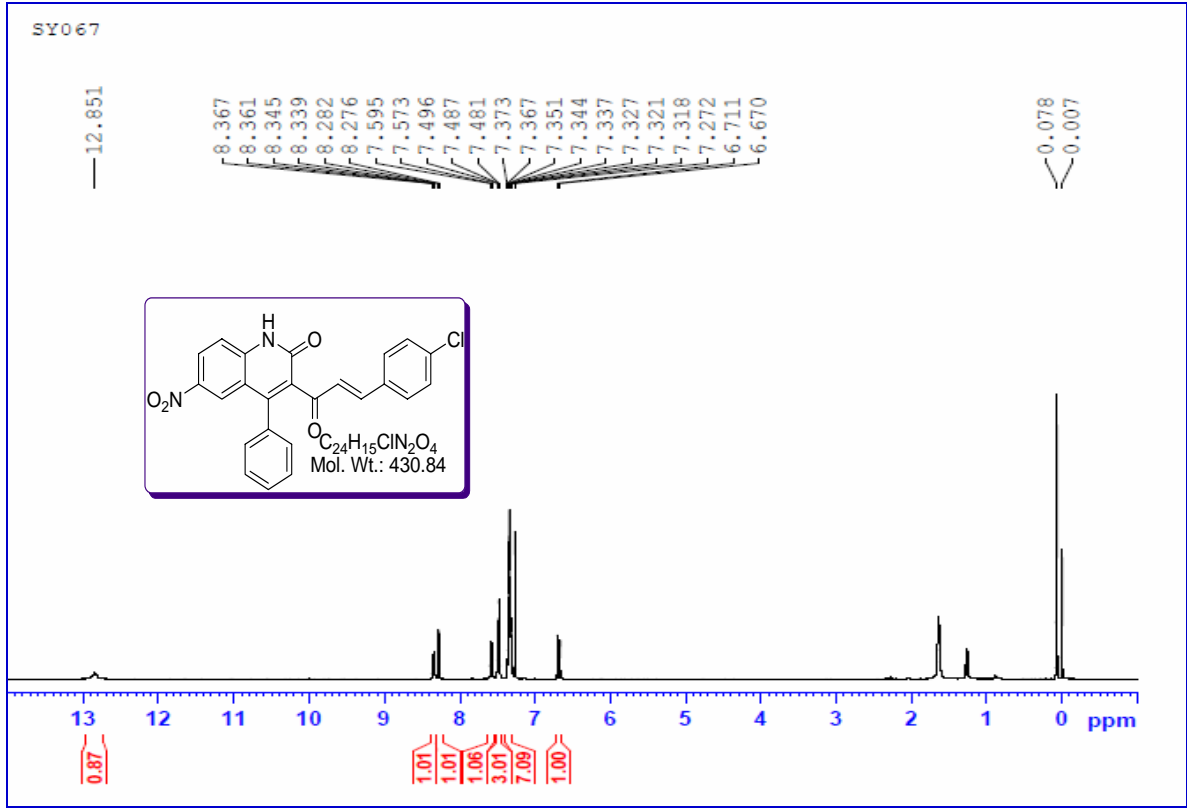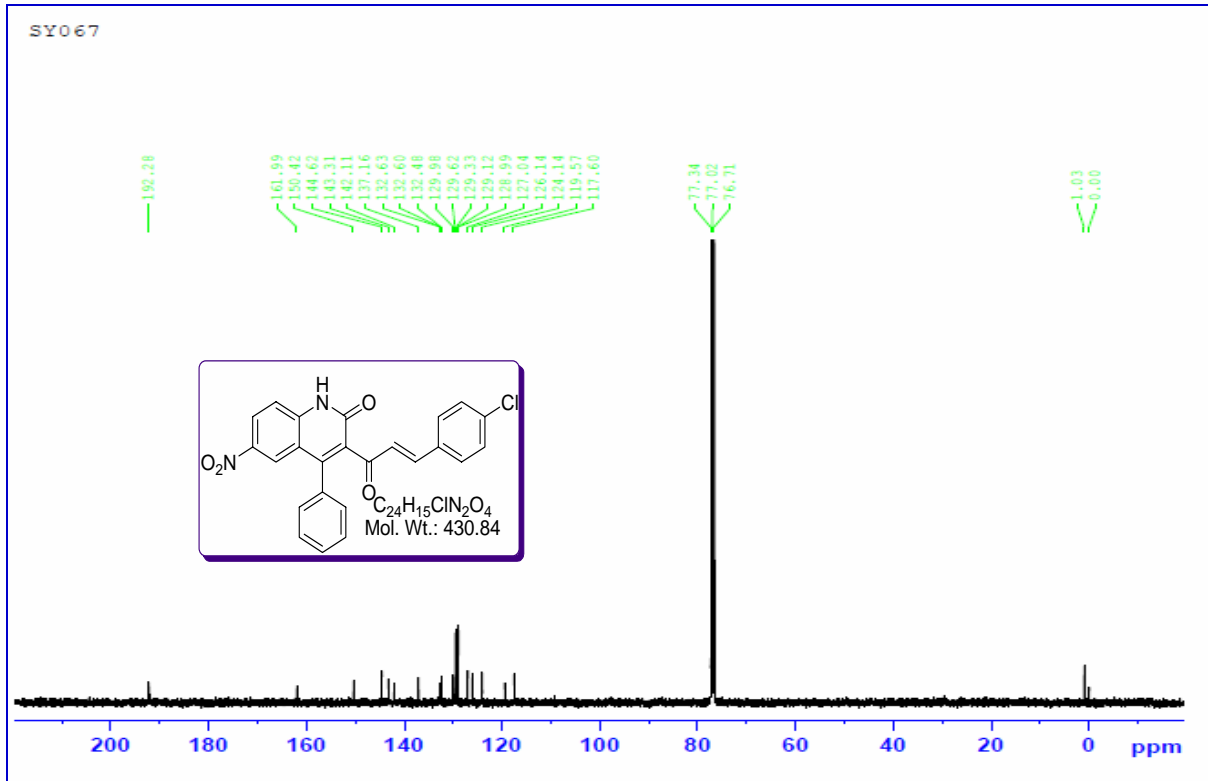

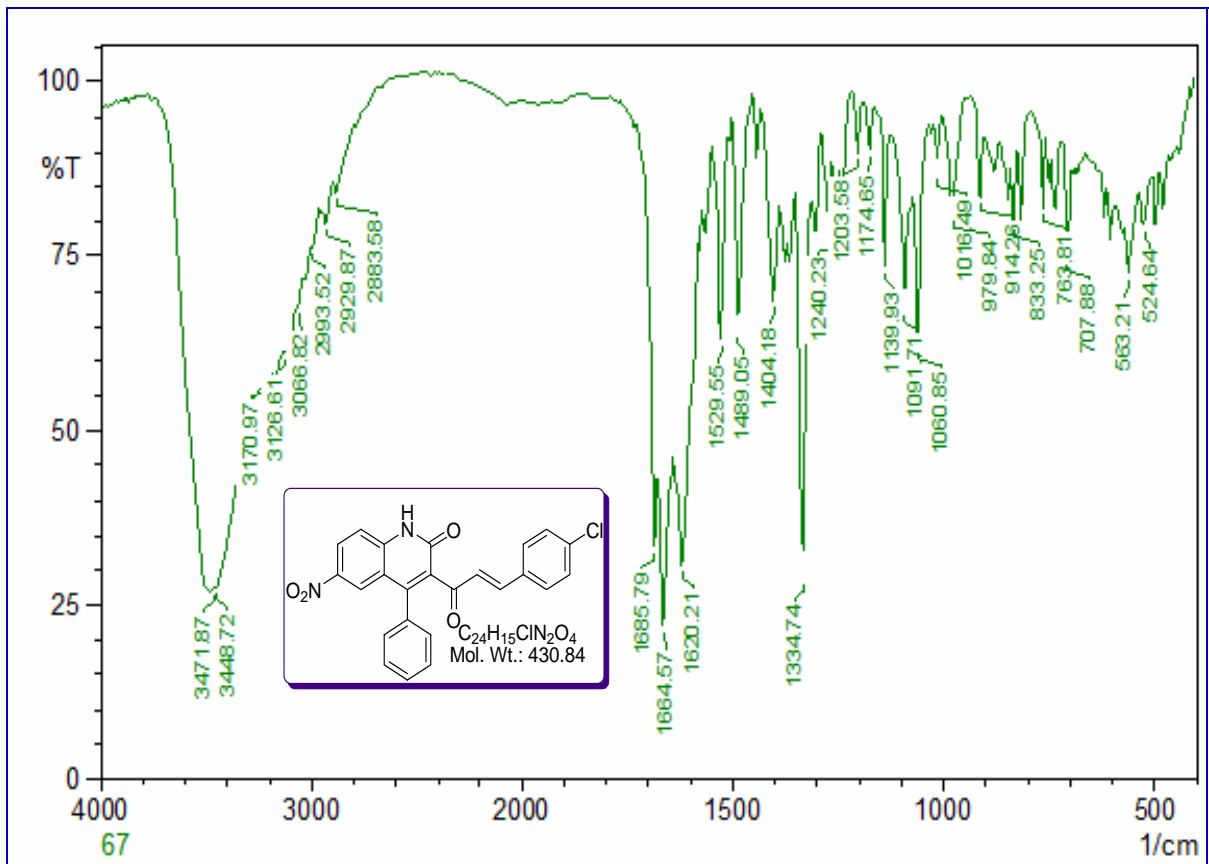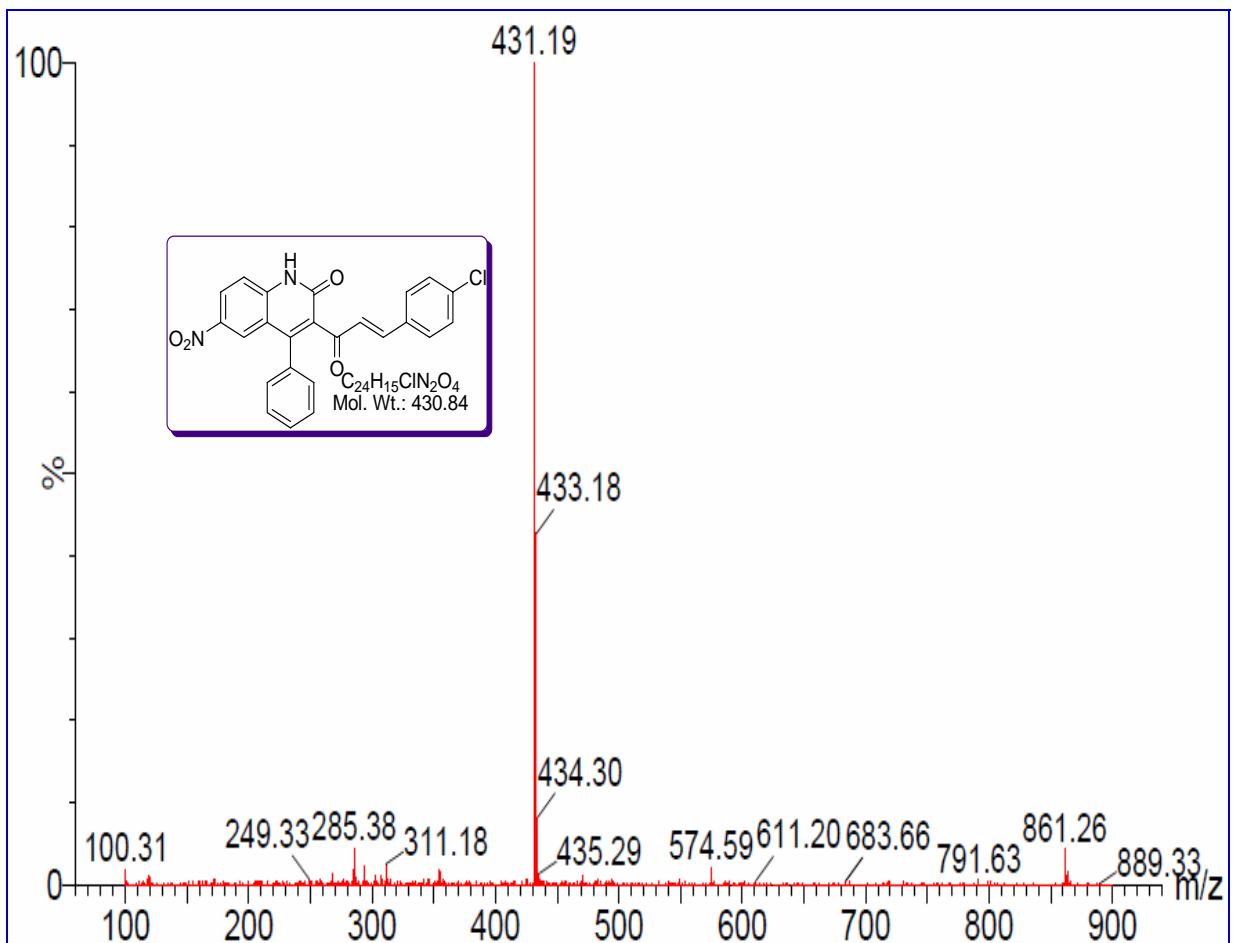



SYO68

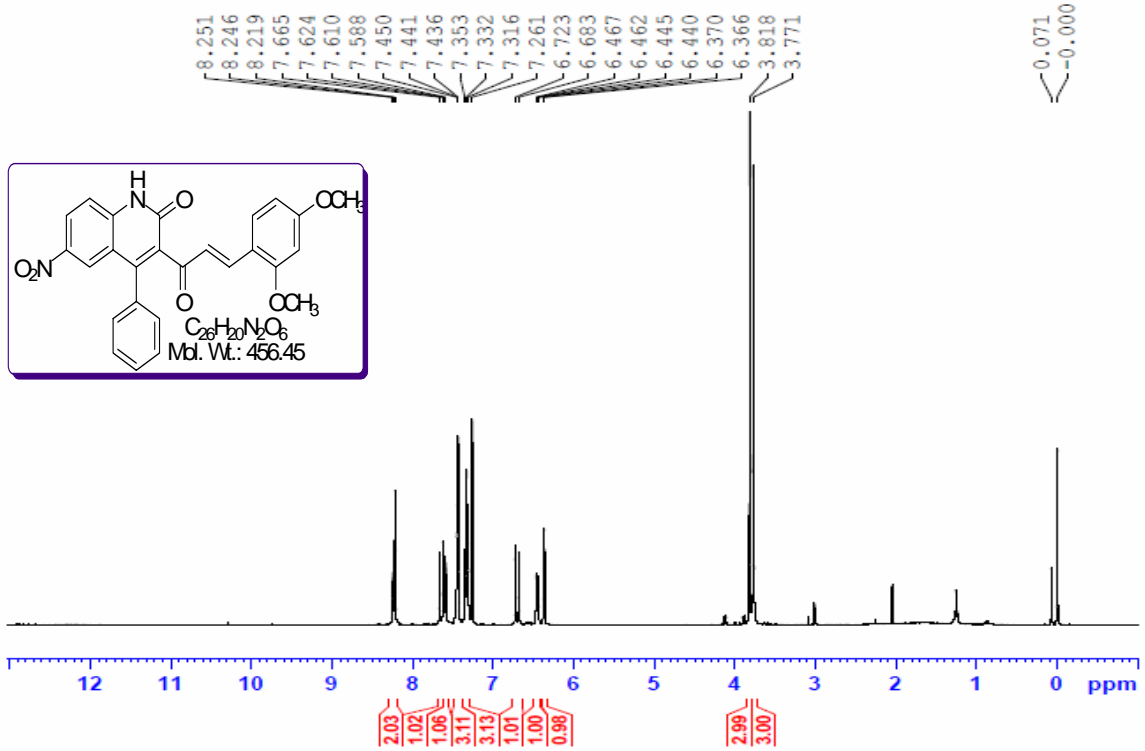

SYO68

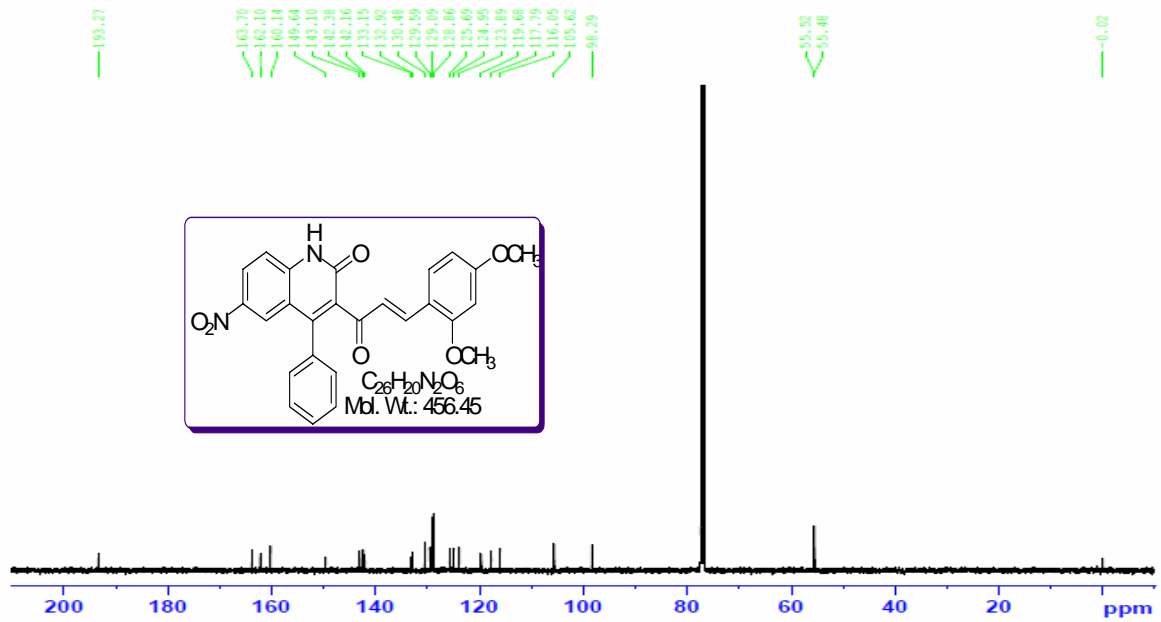

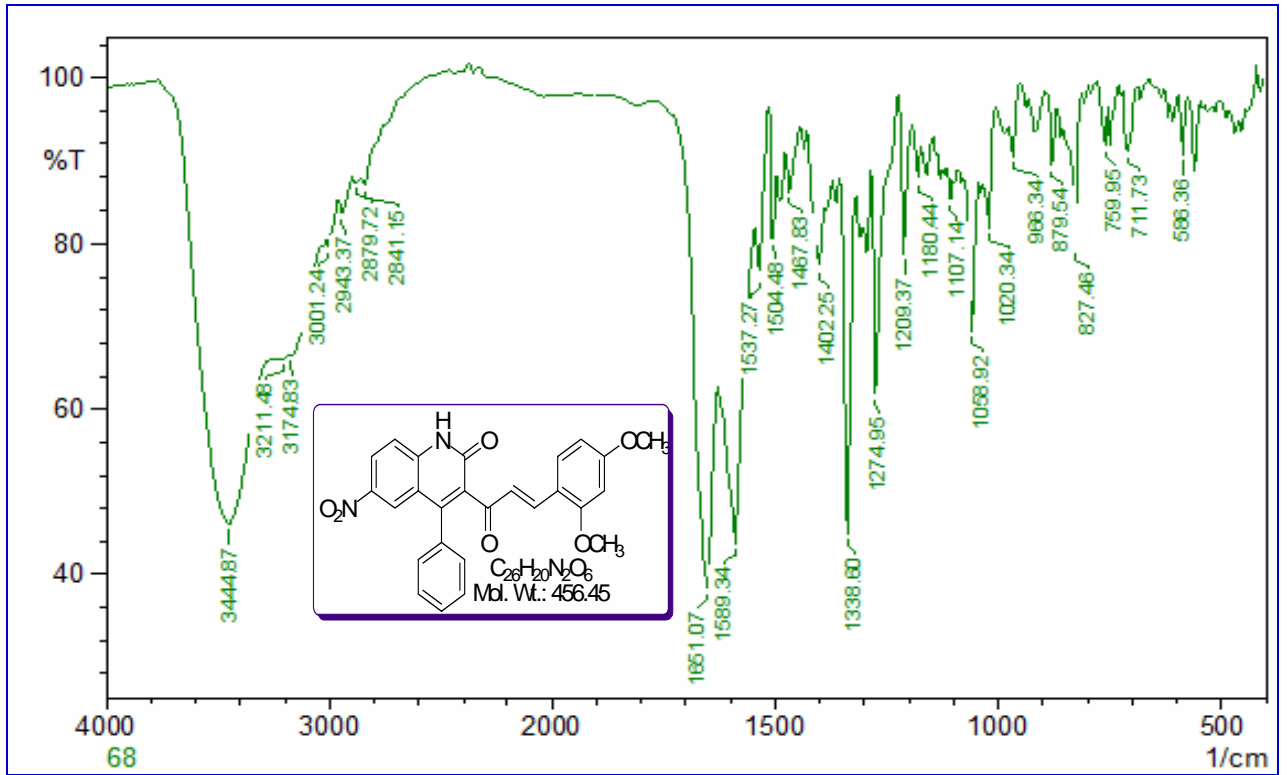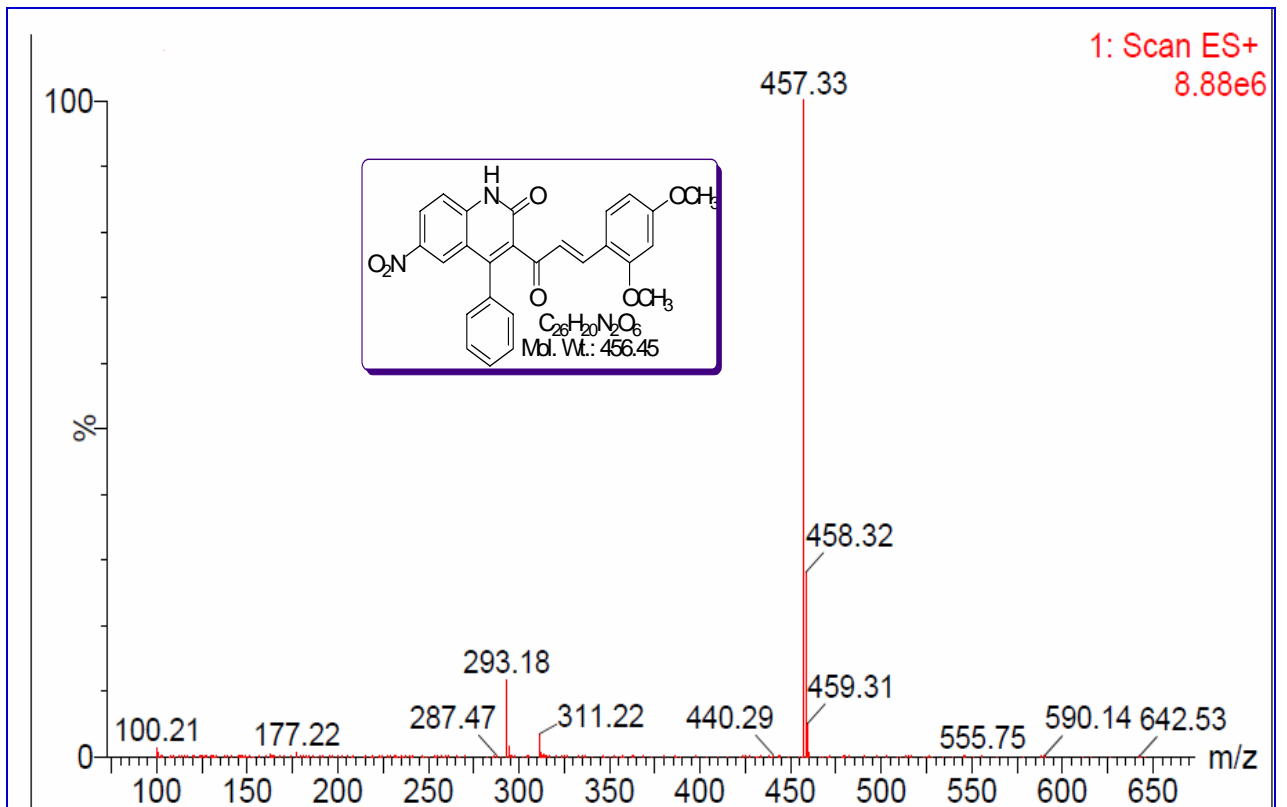

SY069

12.690

8.303  
8.284  
8.238  
7.552  
7.530  
7.455  
7.298  
7.247  
6.896  
6.765  
6.745  
6.569  
6.528  
5.988

0.054  
-0.016

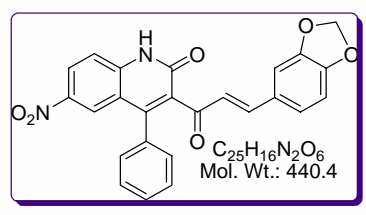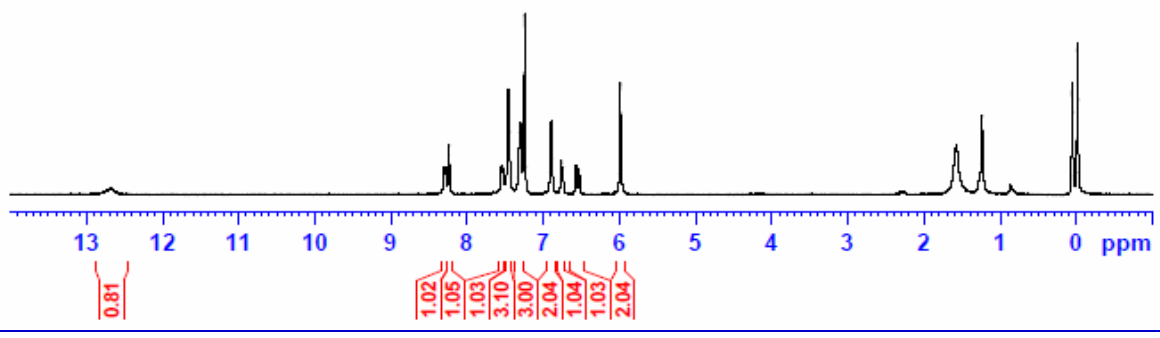

SY069

192.29

161.99  
150.46  
150.12  
148.49  
146.20  
143.22  
142.07  
139.91  
132.74  
129.84  
129.03  
128.96  
128.43  
126.01  
125.55  
124.90  
124.10  
119.65  
117.53  
108.66  
106.57  
101.79

77.33  
77.01  
76.70

1.02  
-0.00

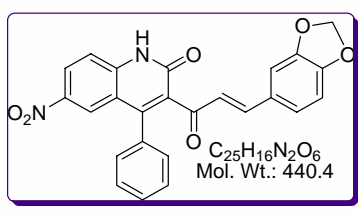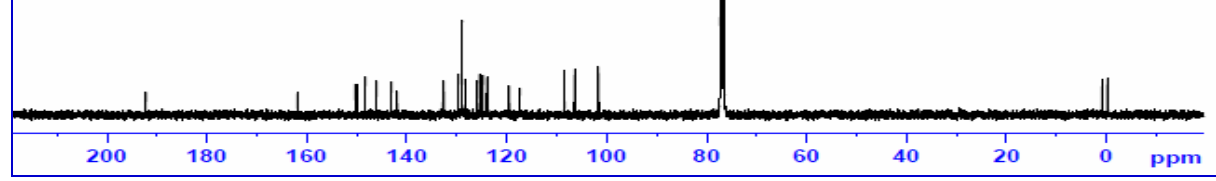

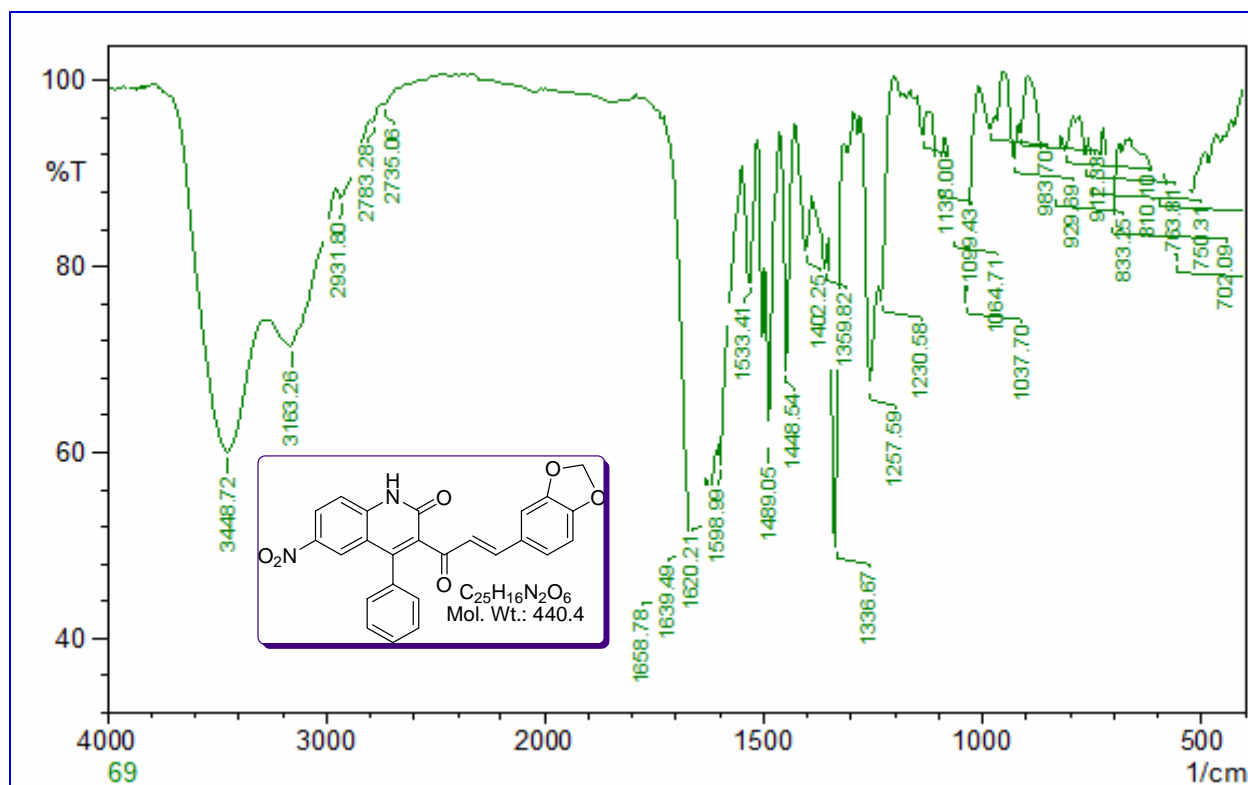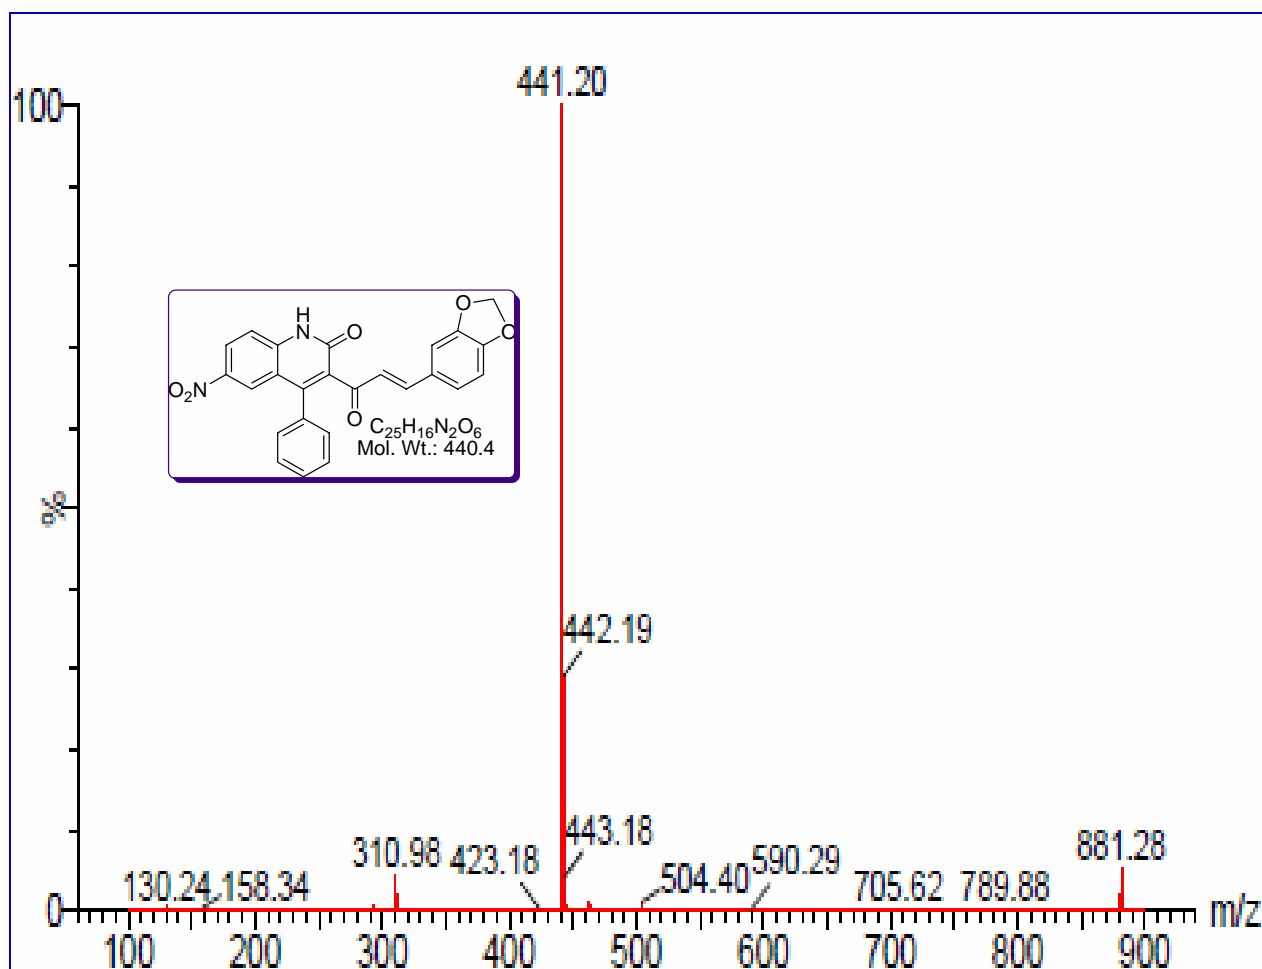

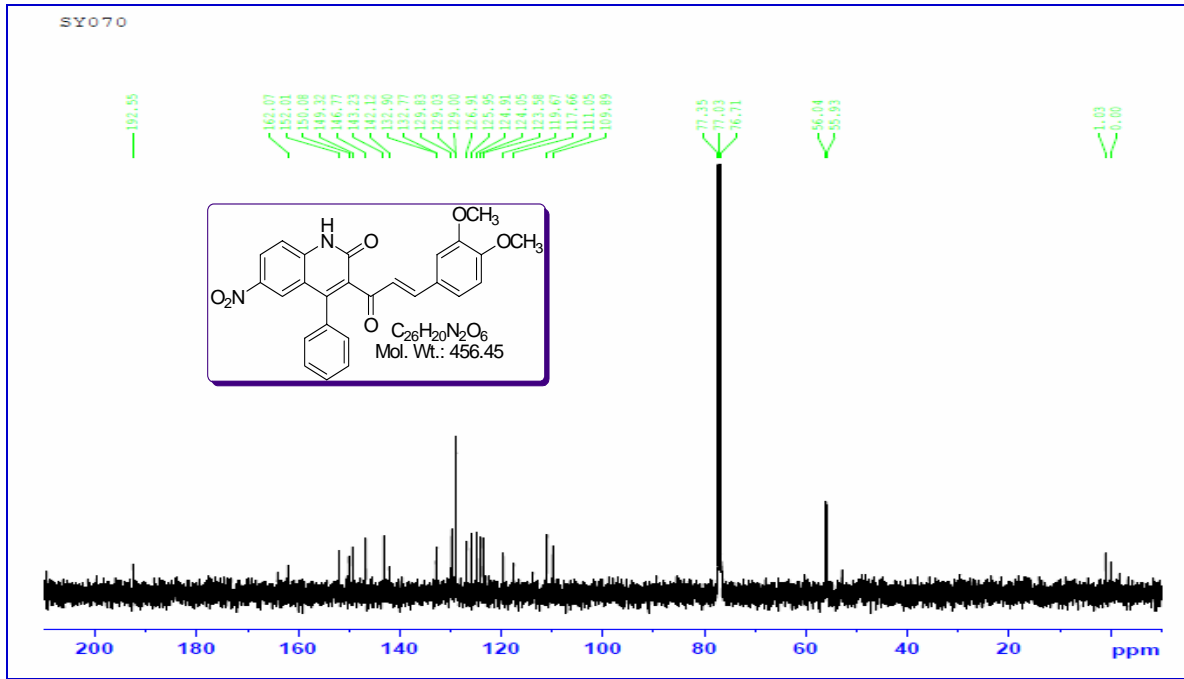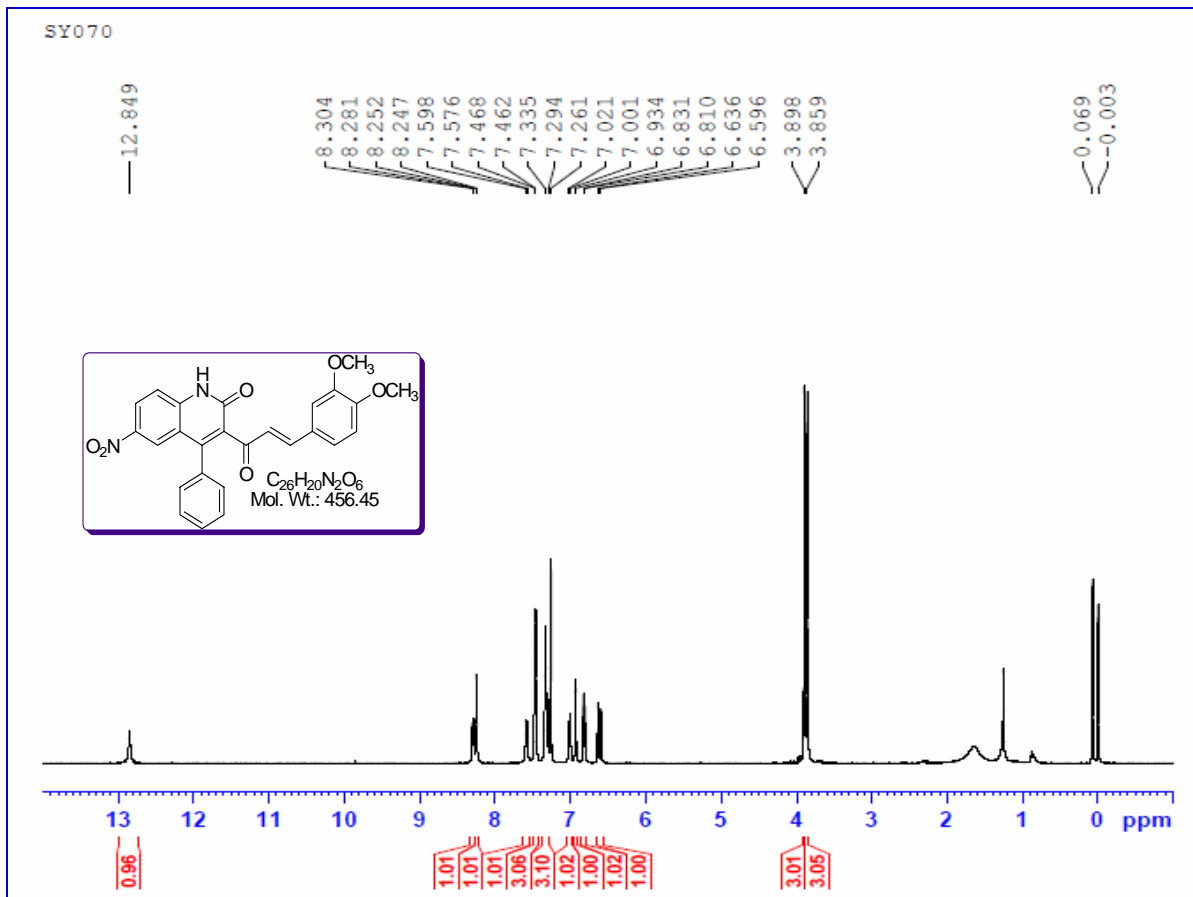

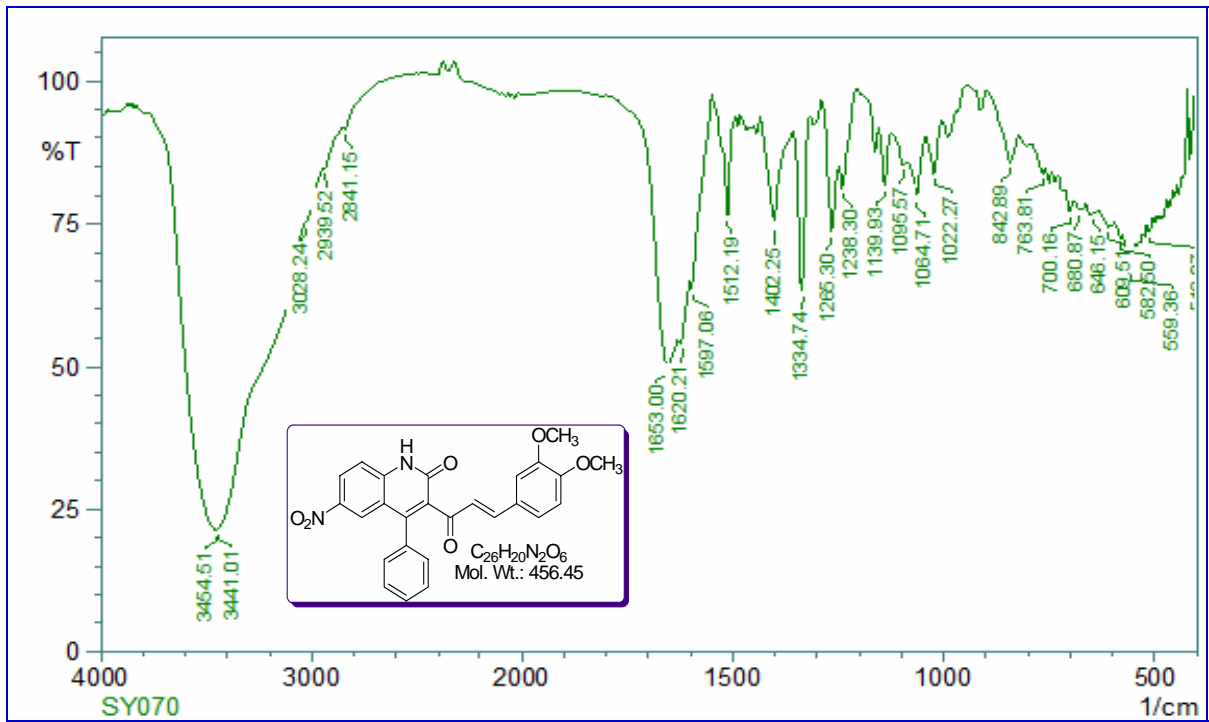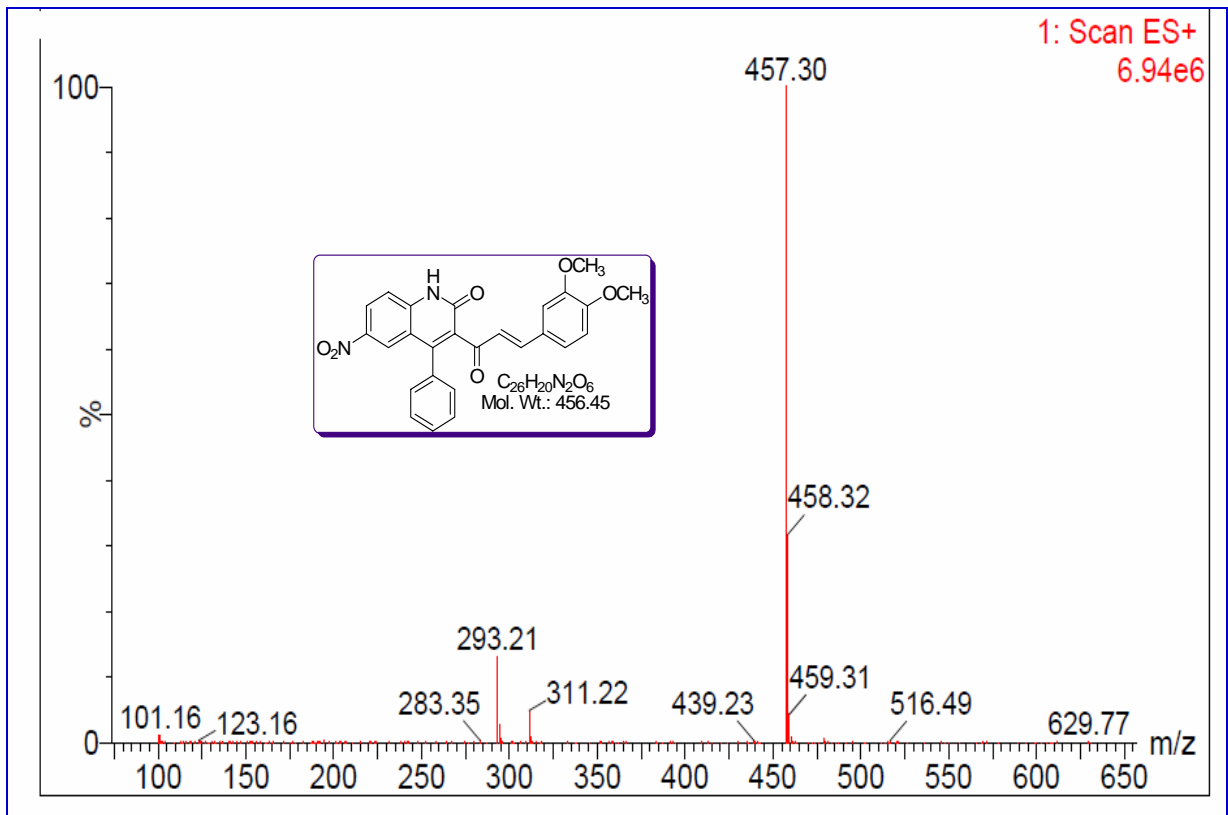

SYO71

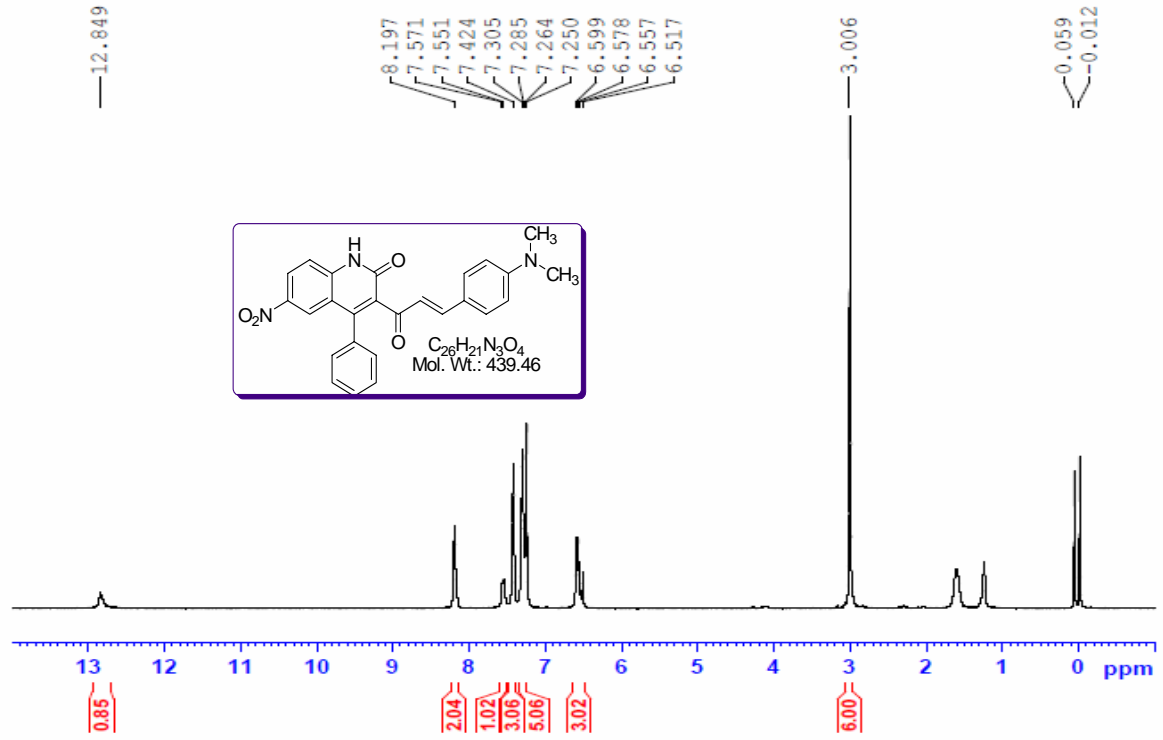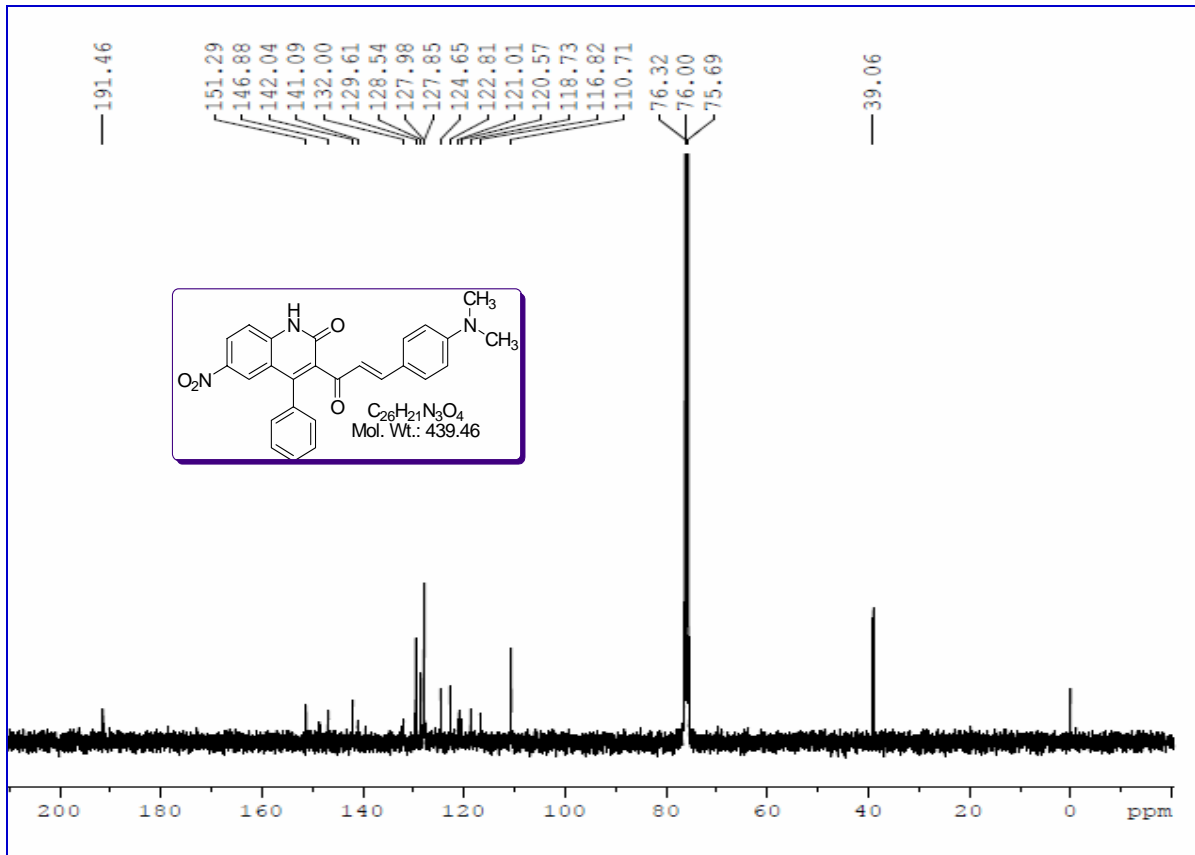

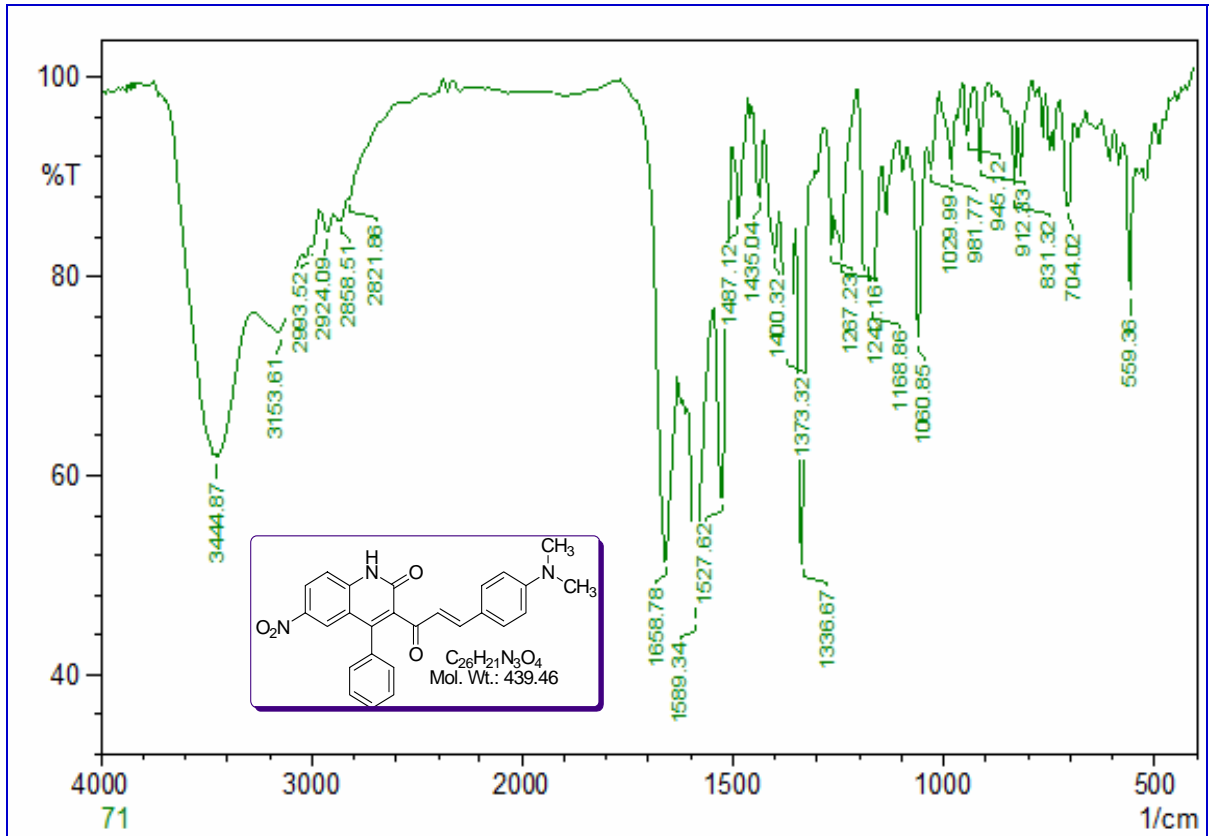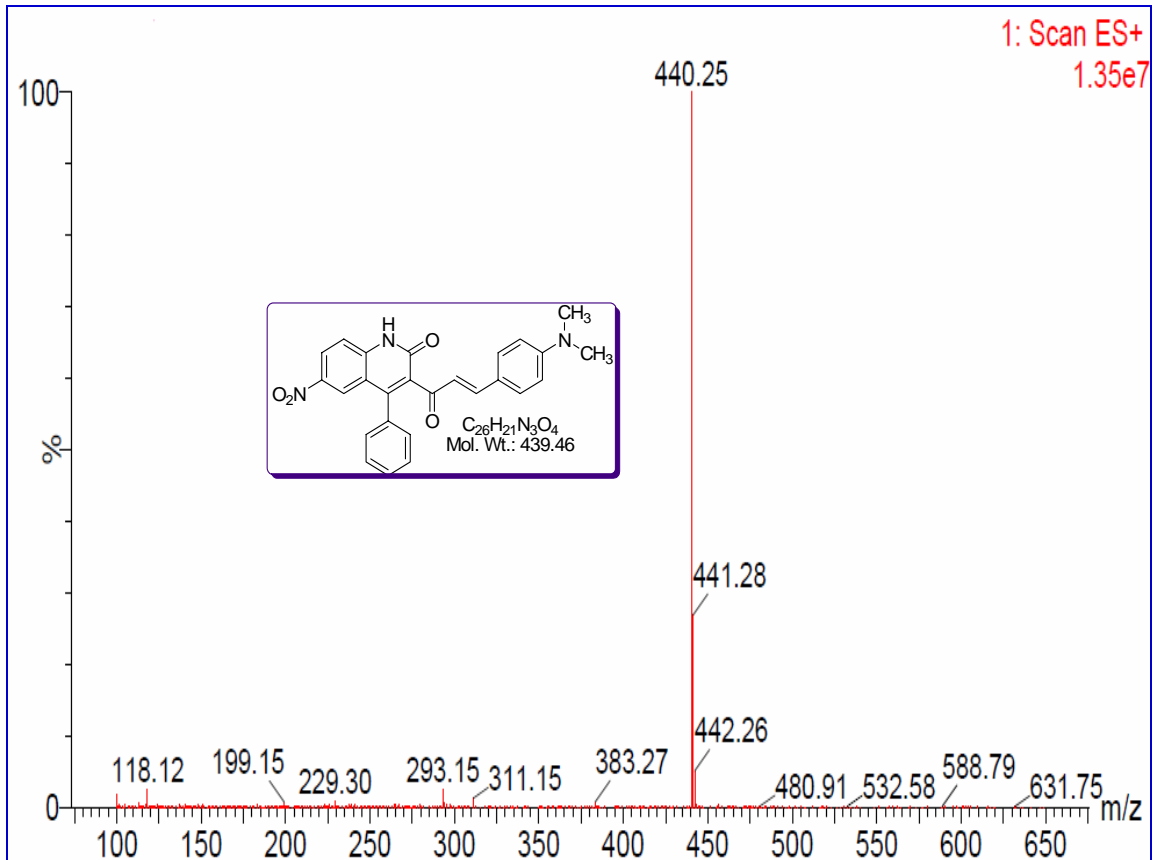



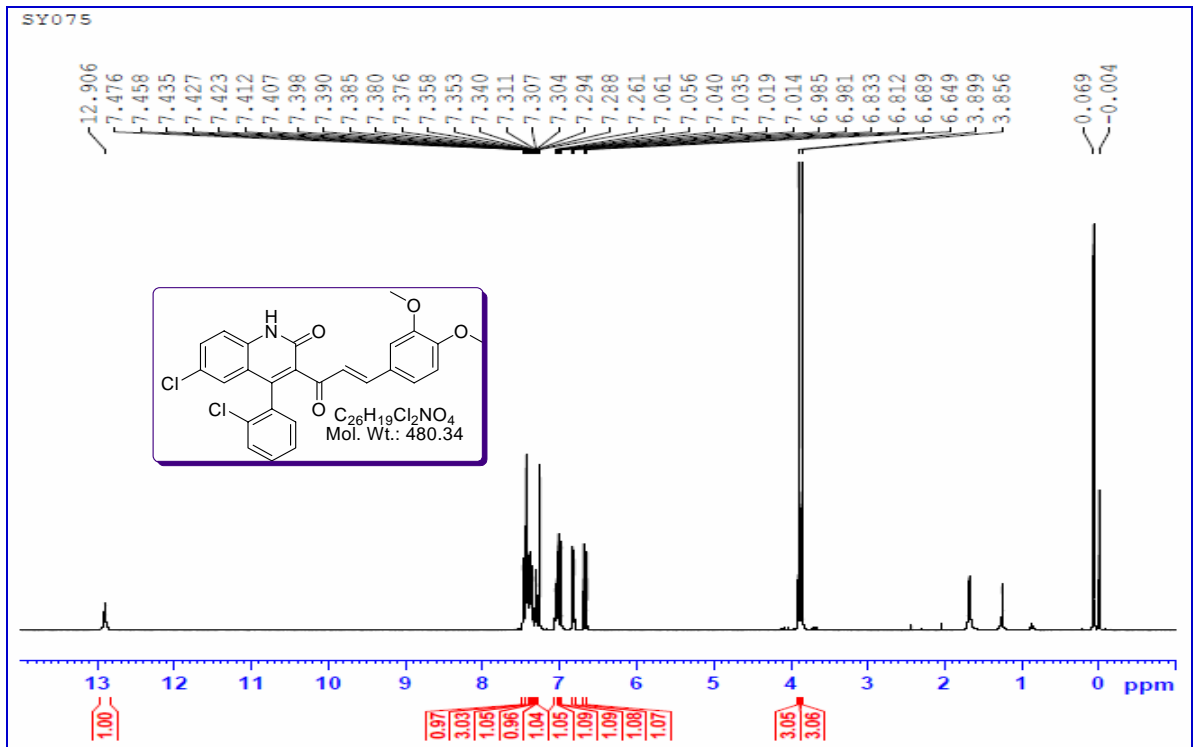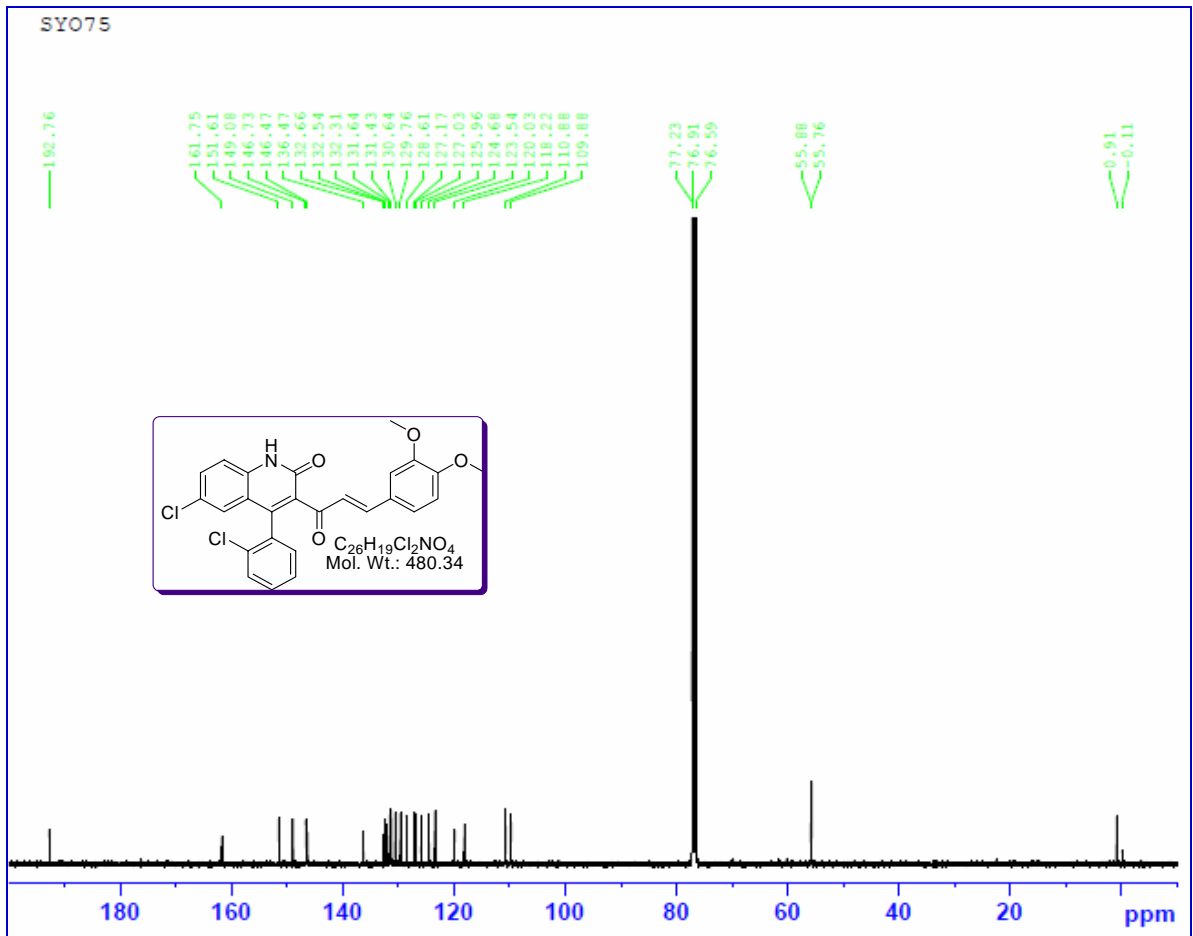

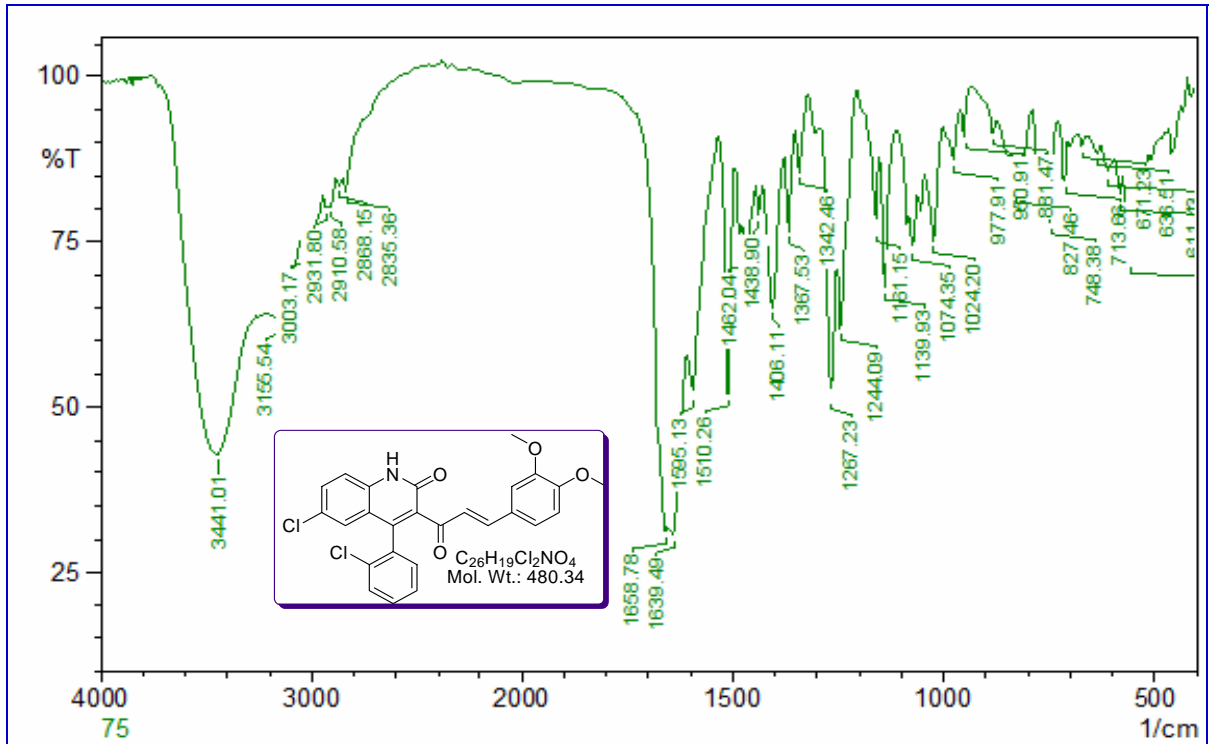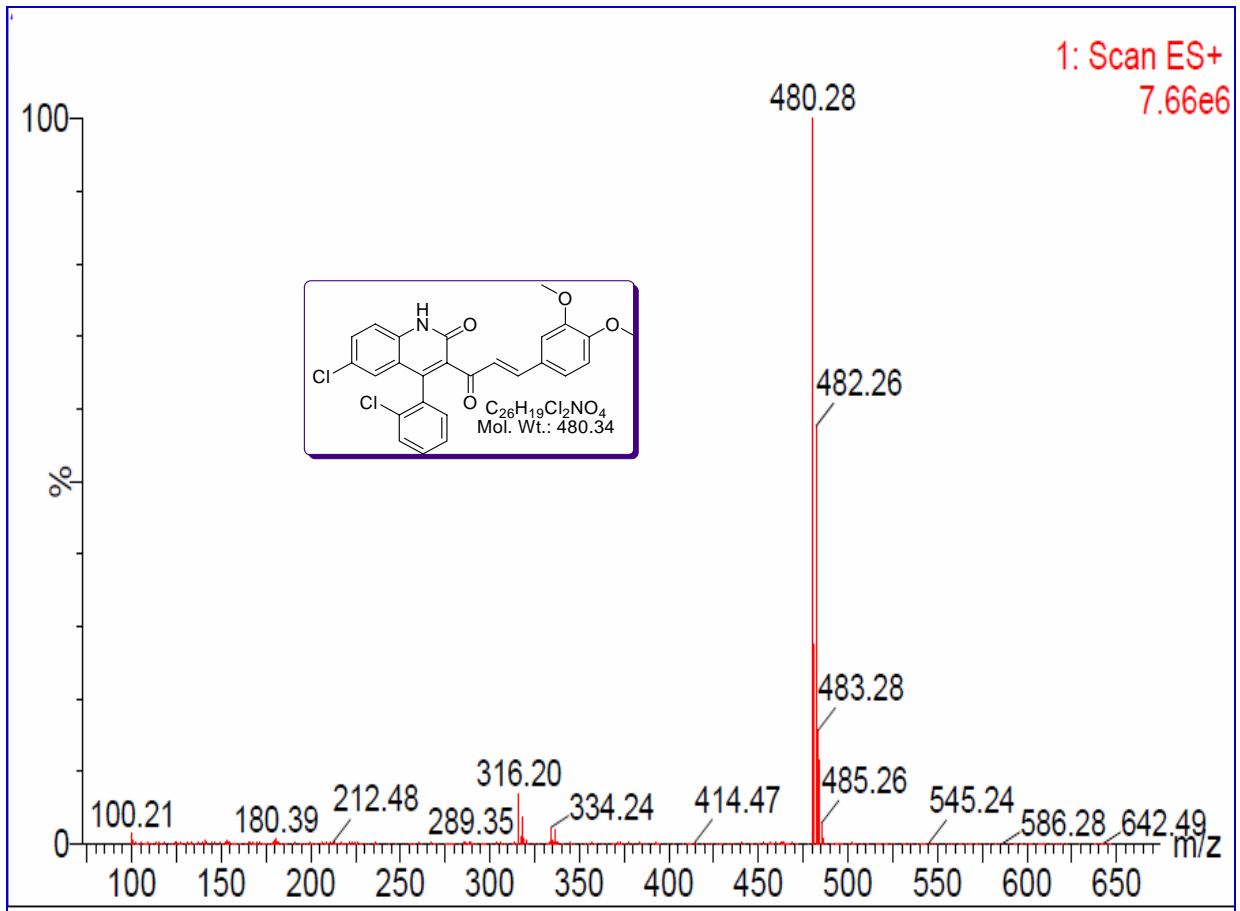

SY076

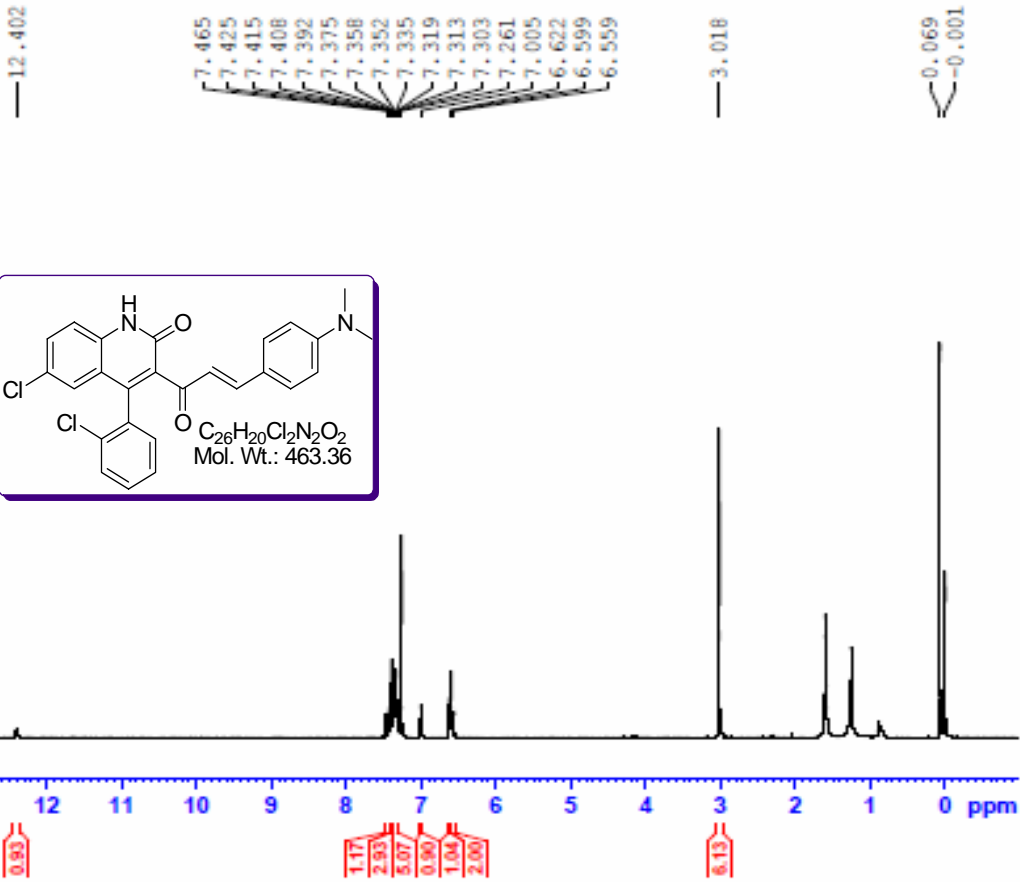

SY076

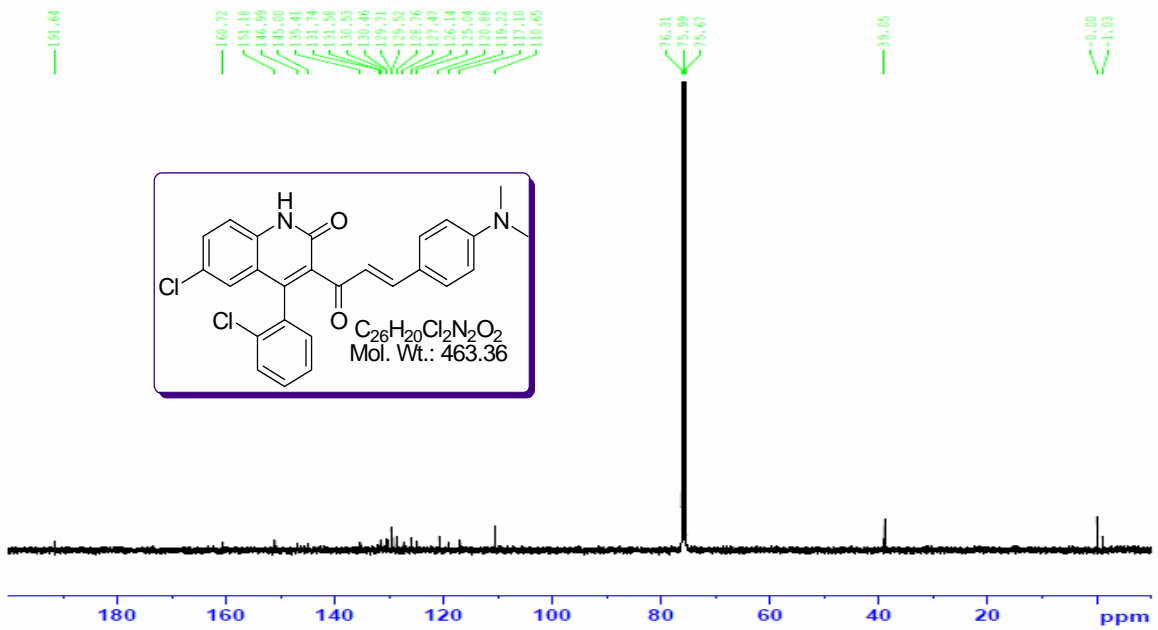

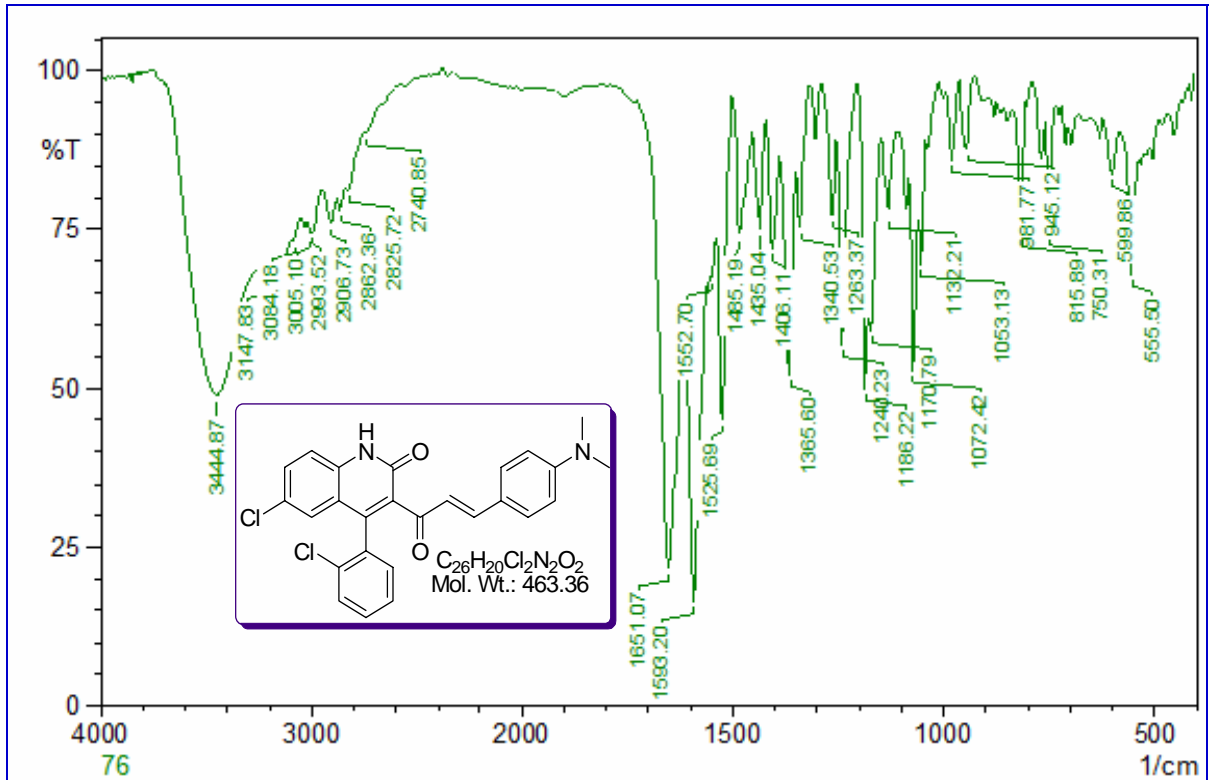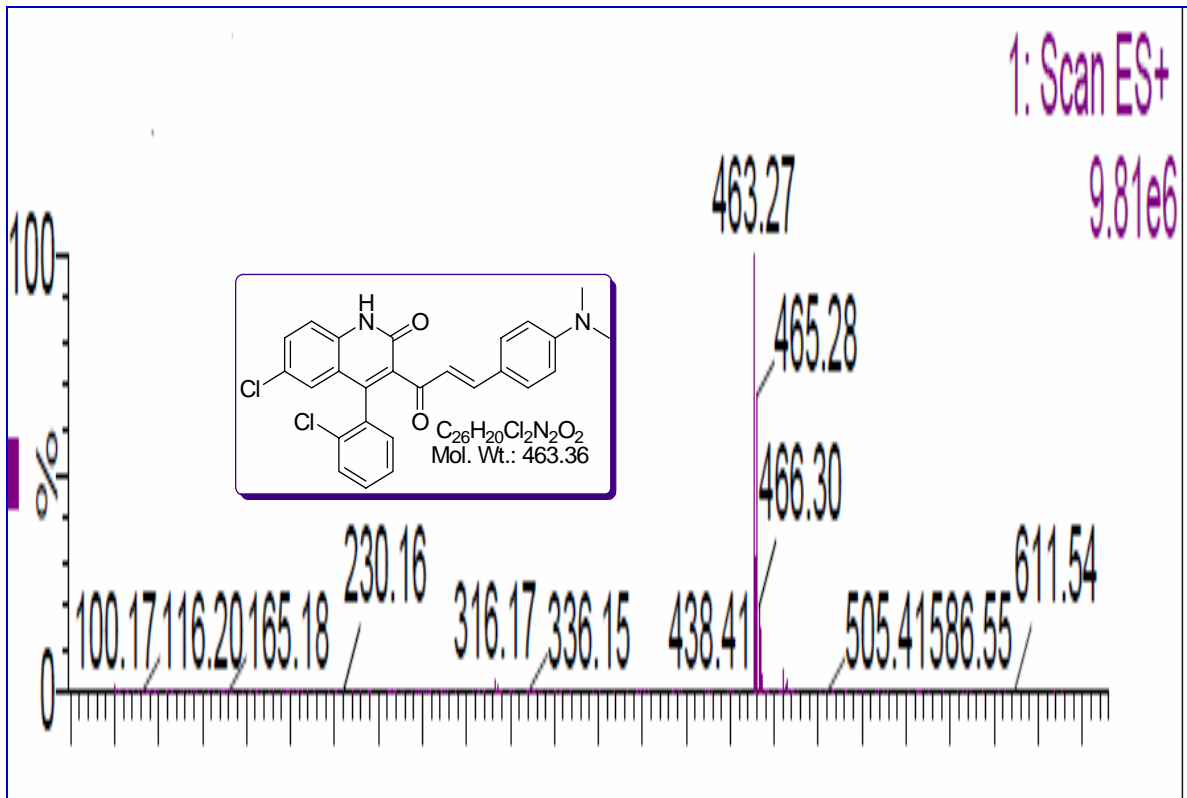

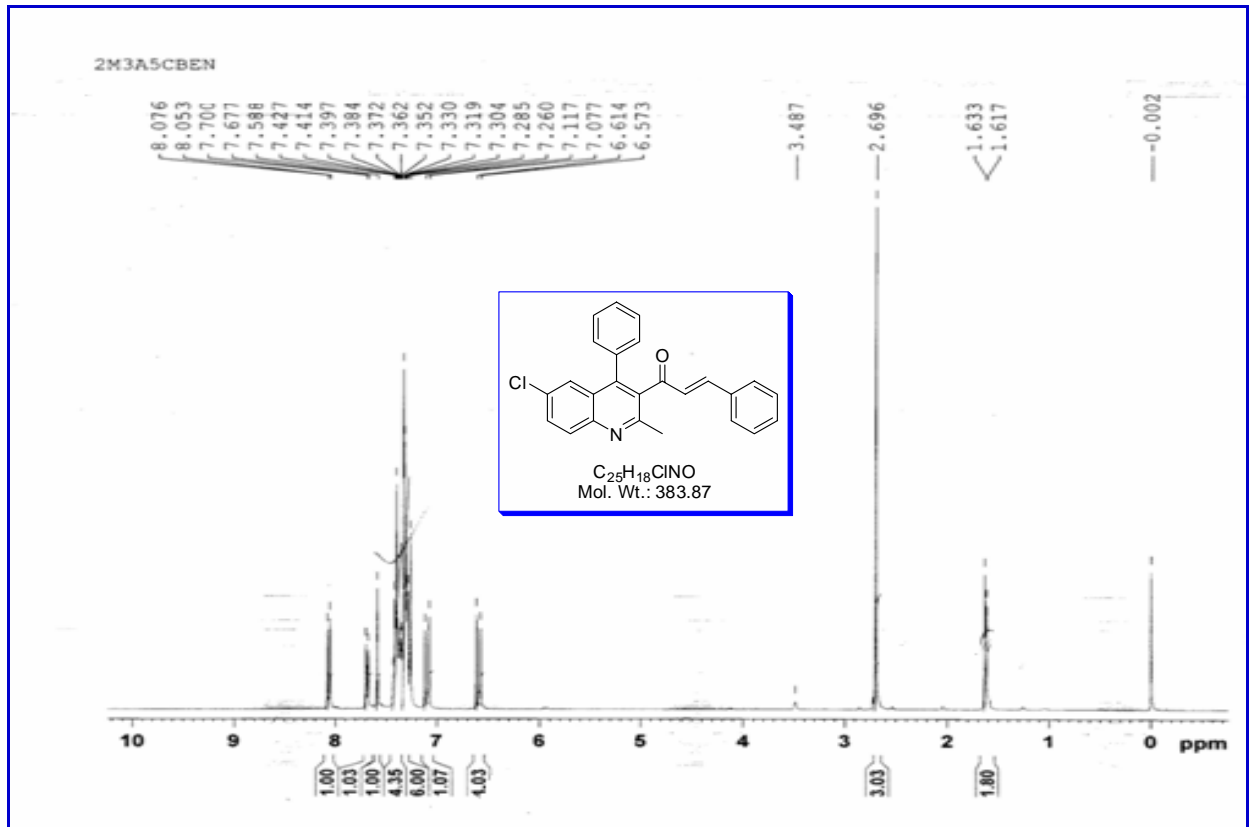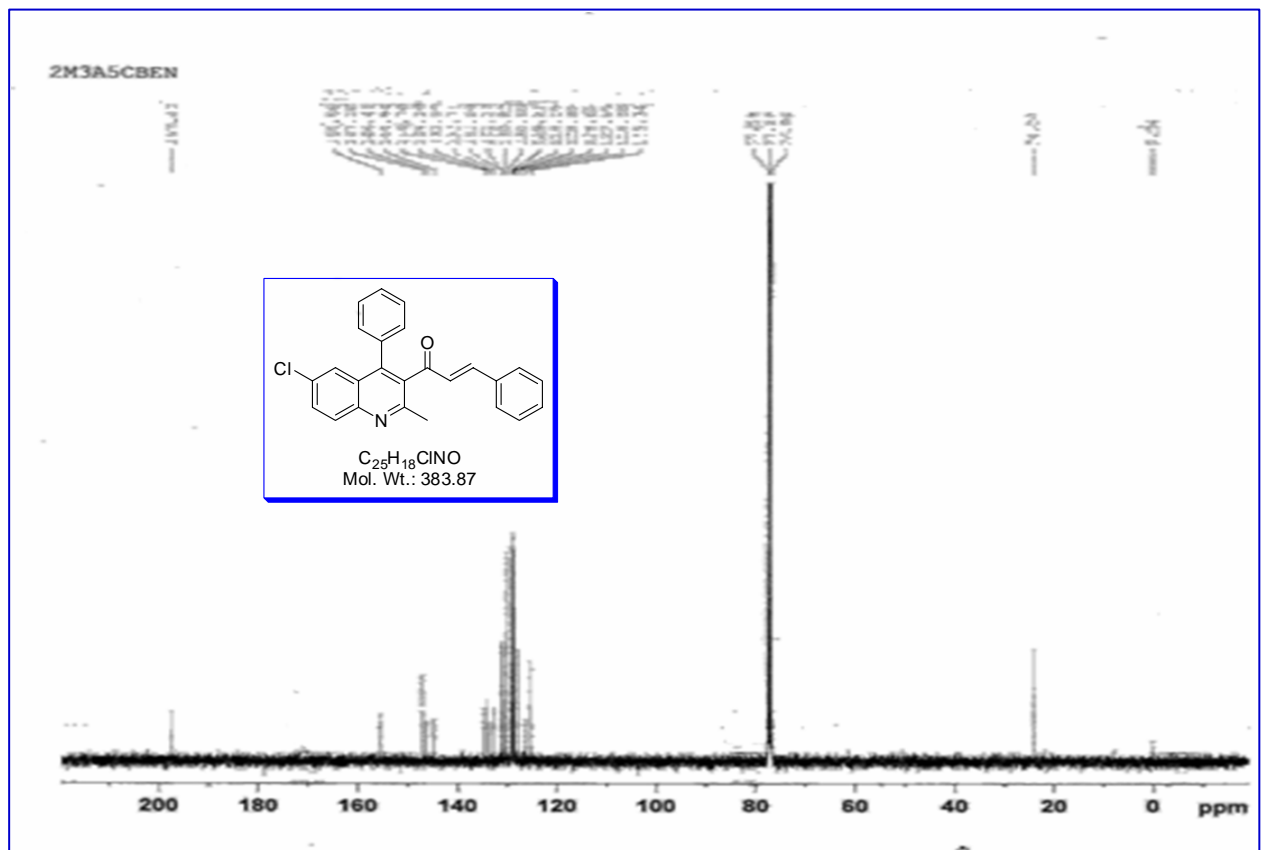

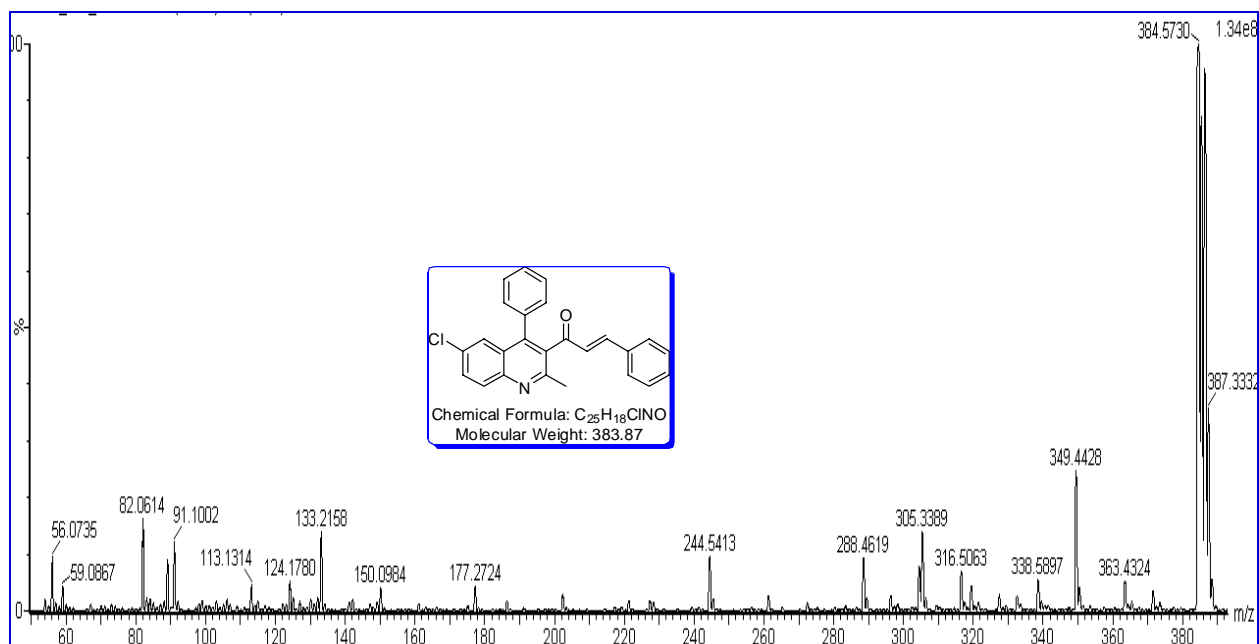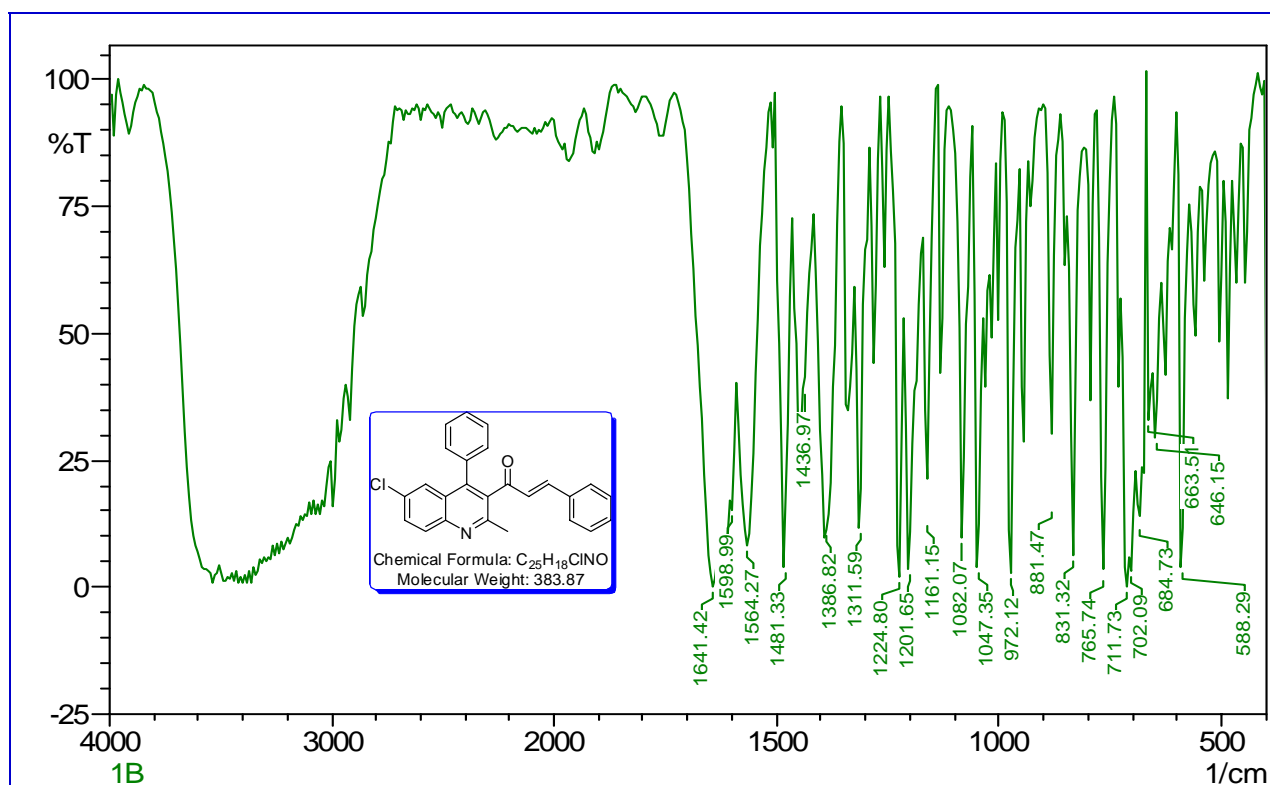

2M3A5CA

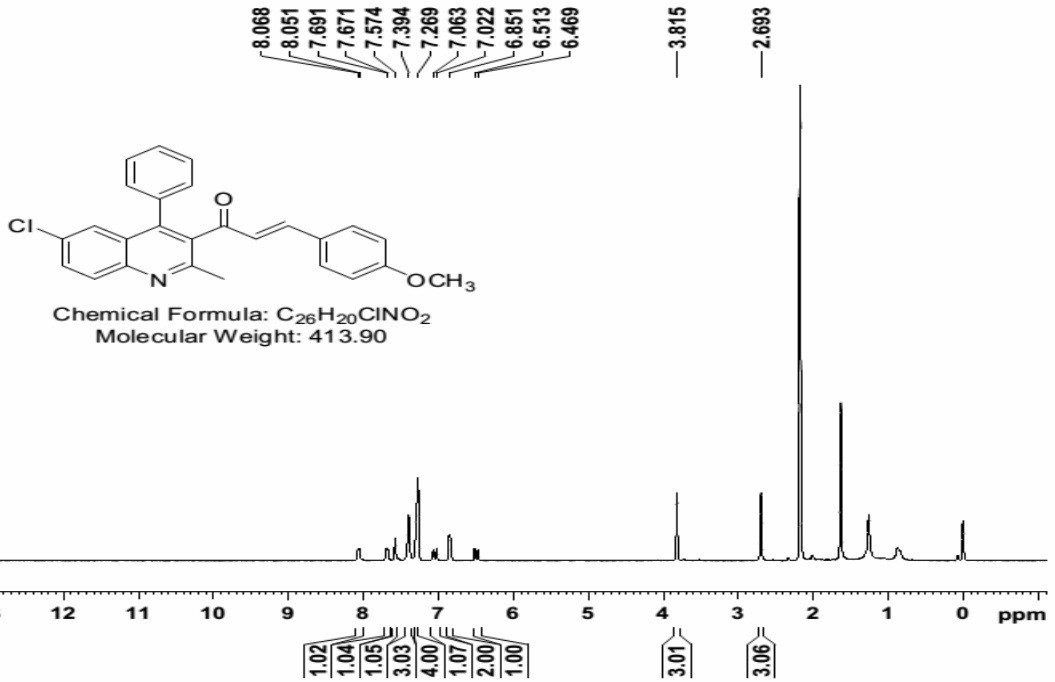

2M3A5CA

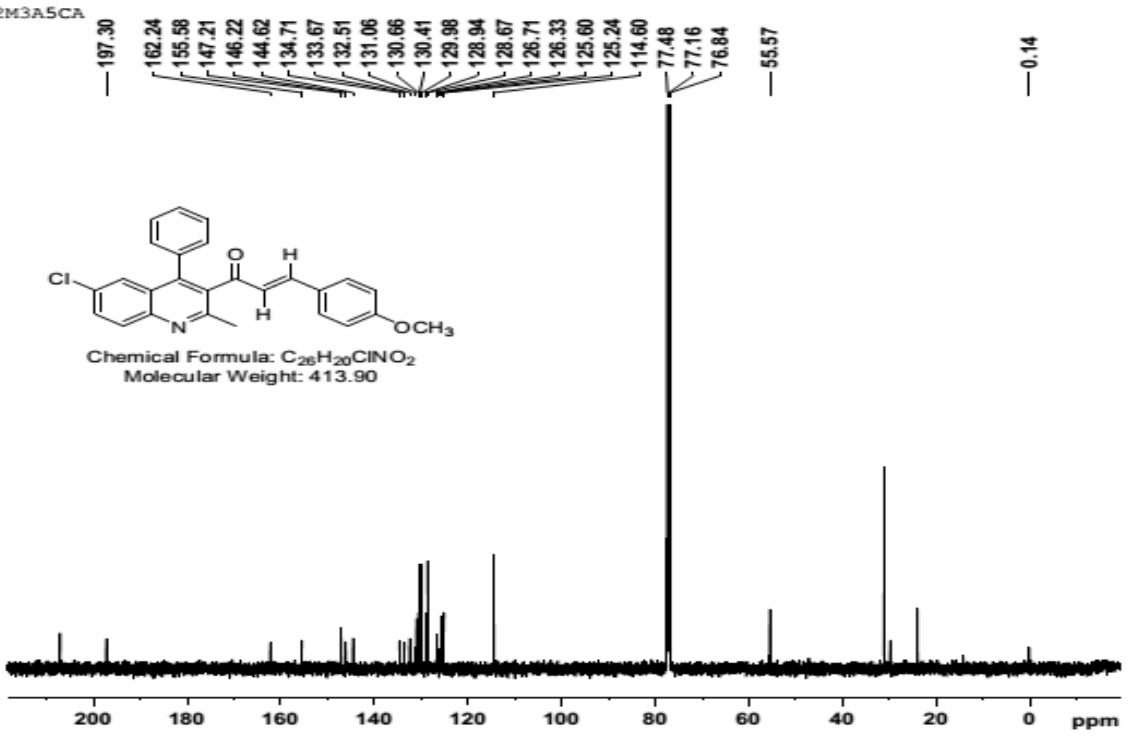

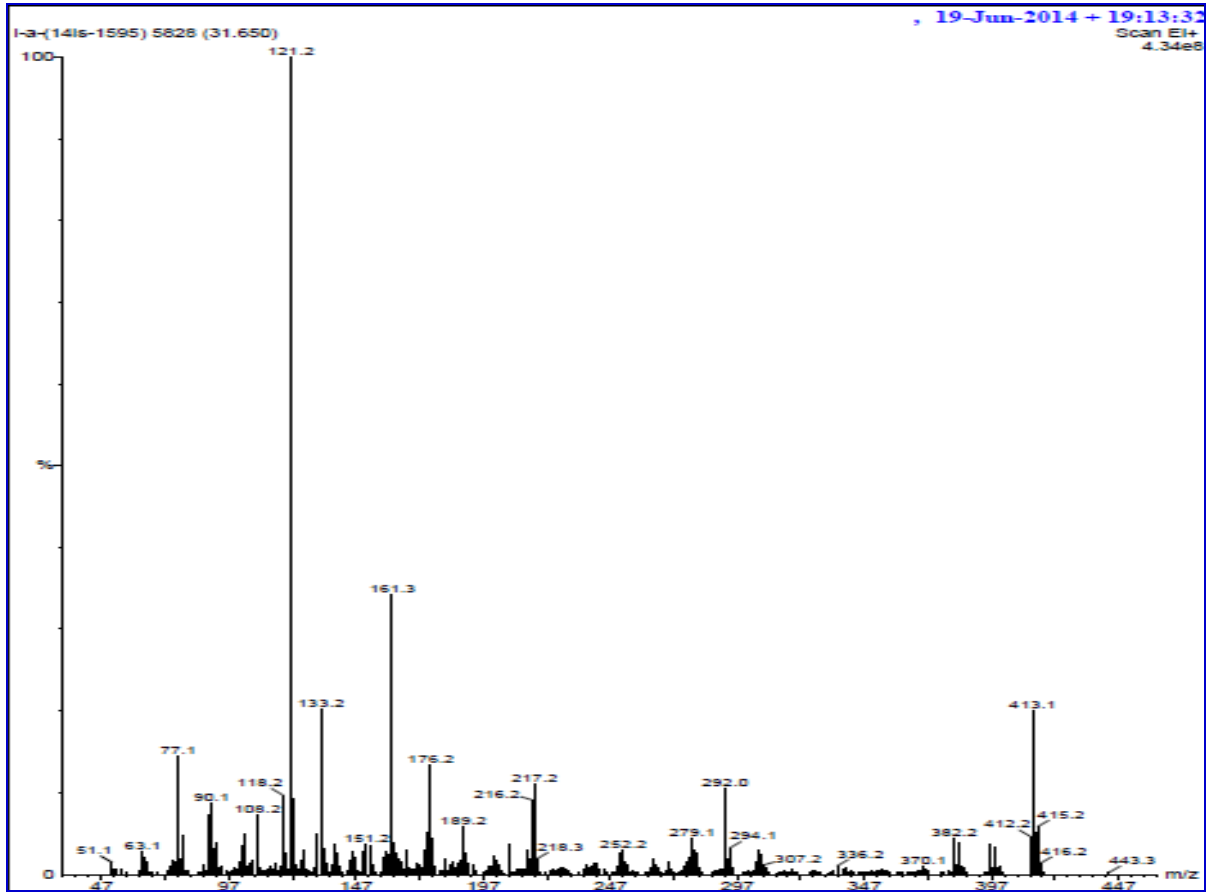



2M3A5C4MB

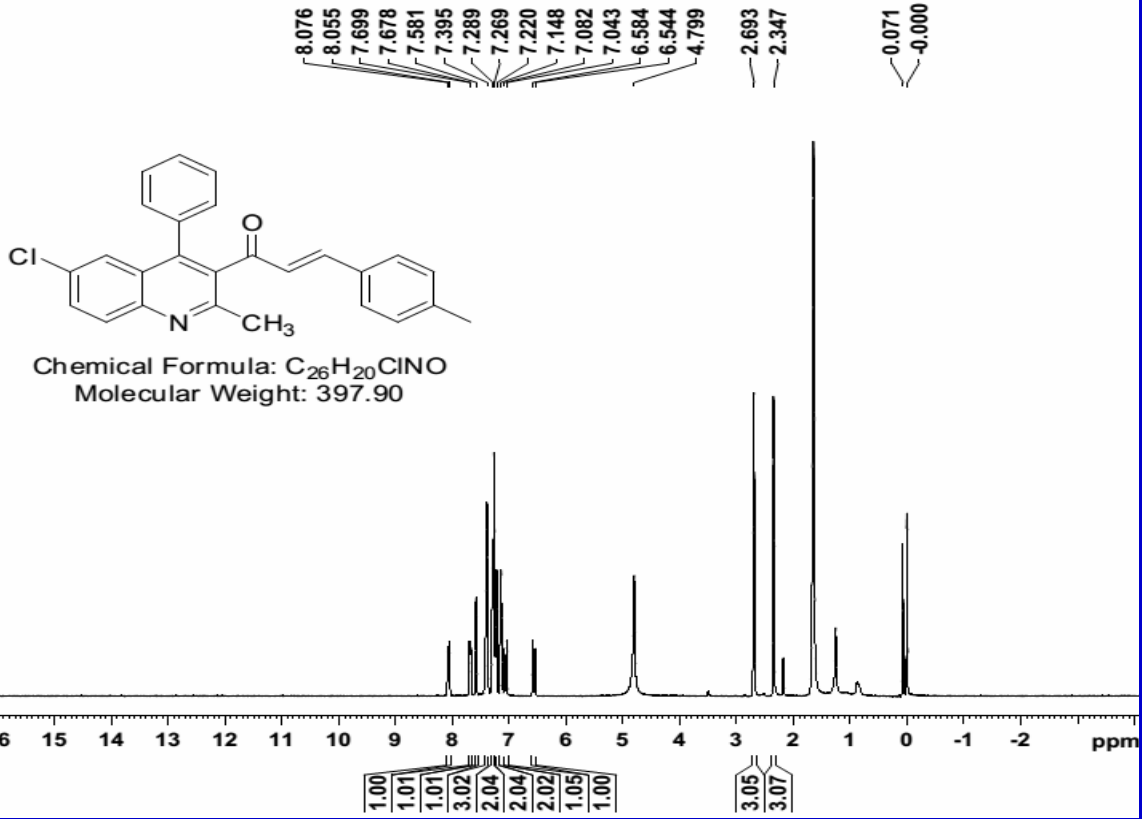

2M3A5C4MB

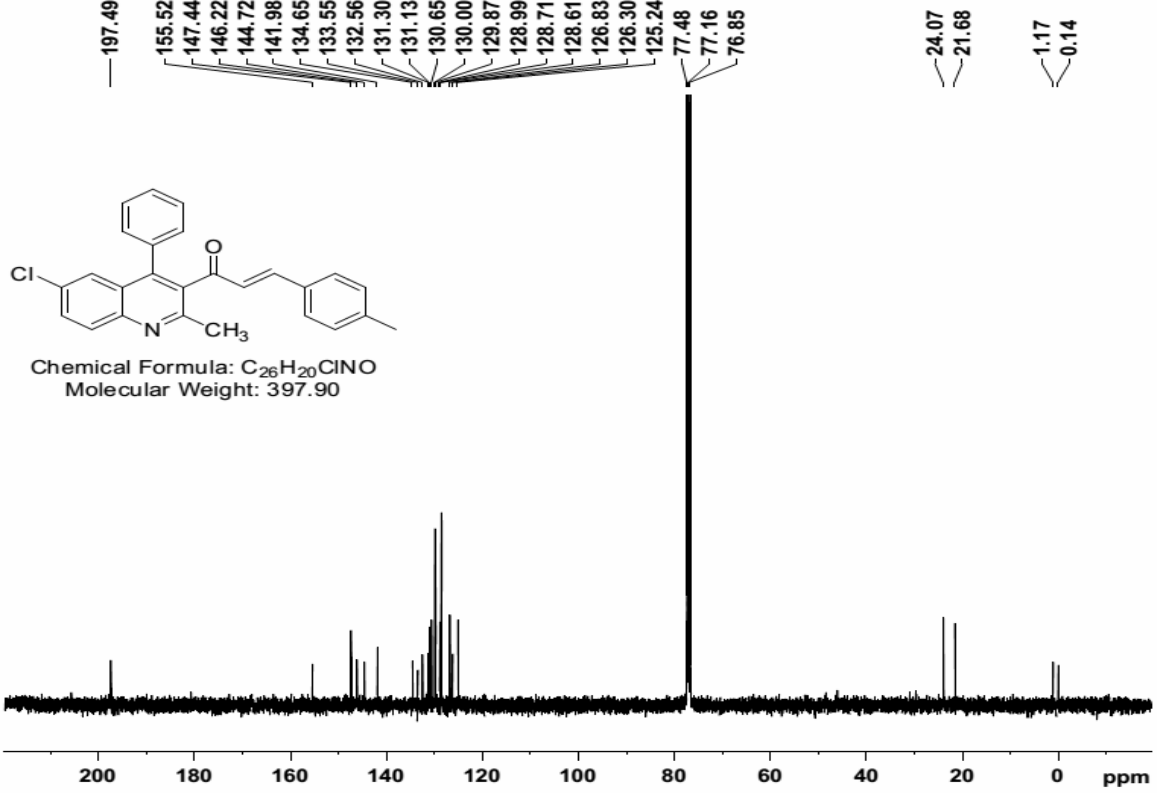

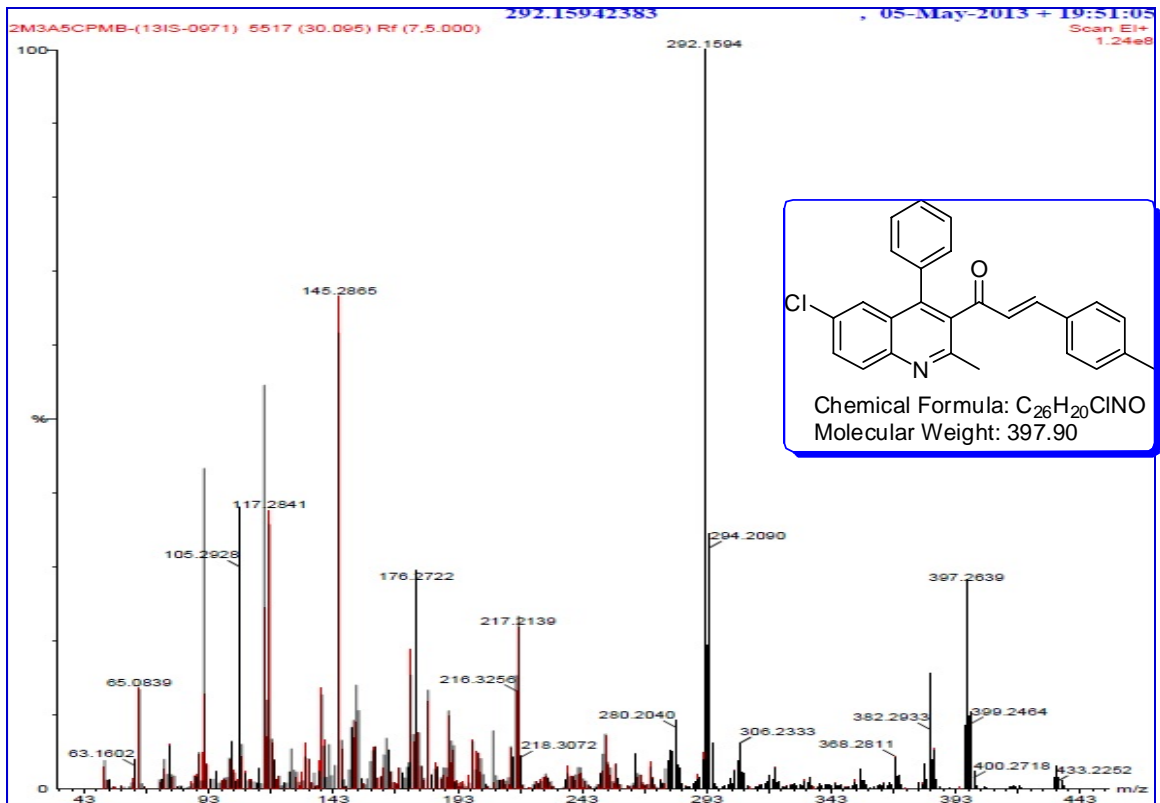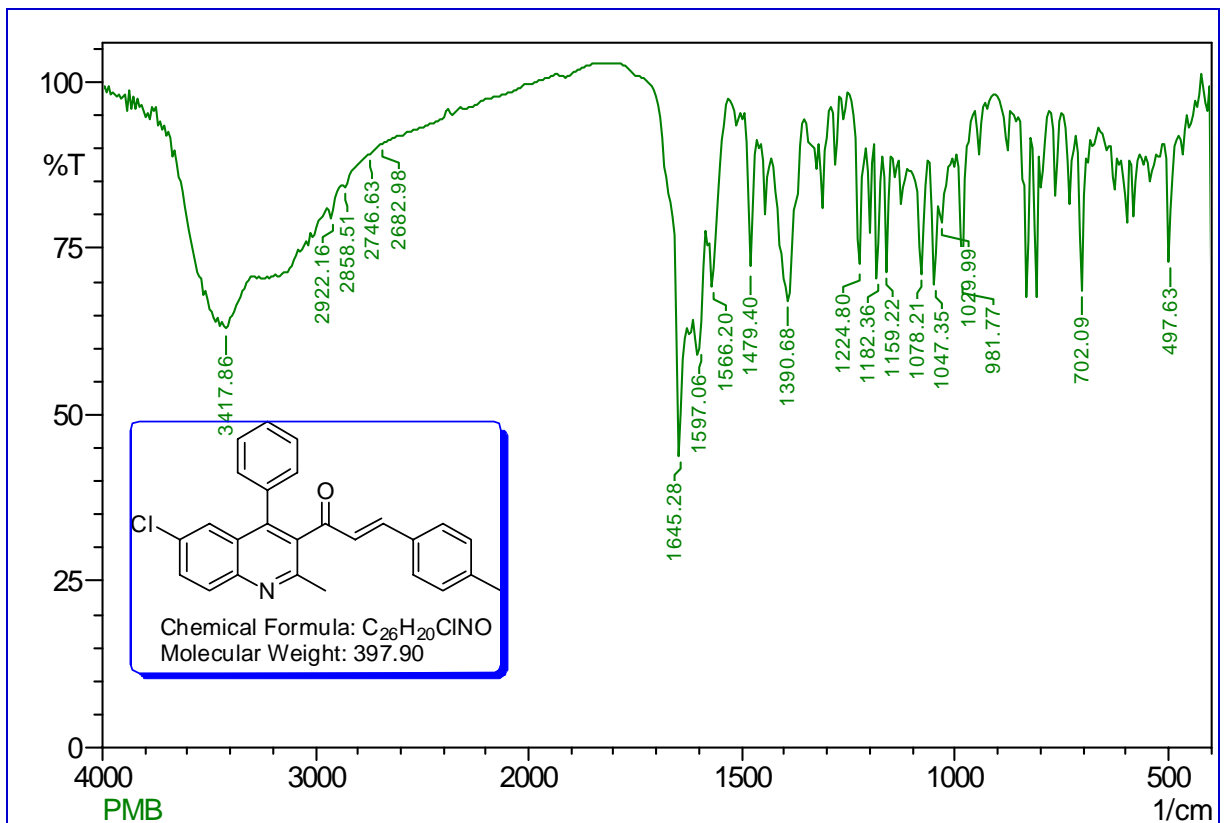

2M3APCB

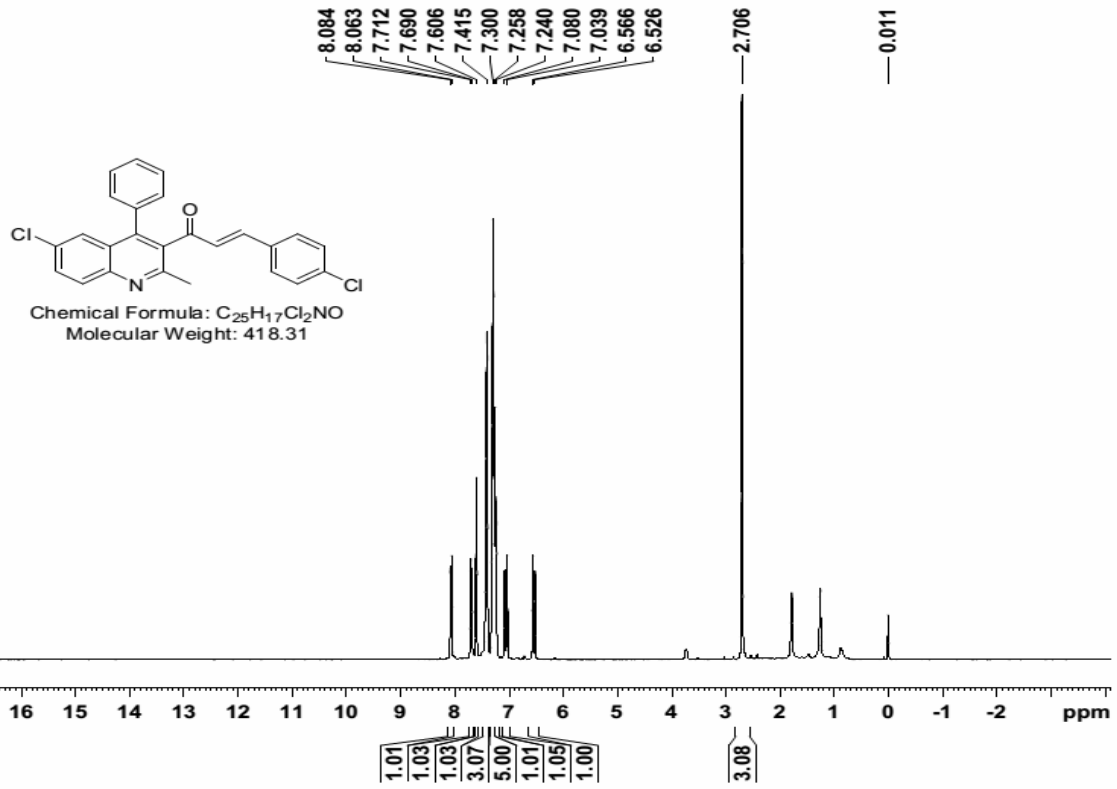

2M3APCB

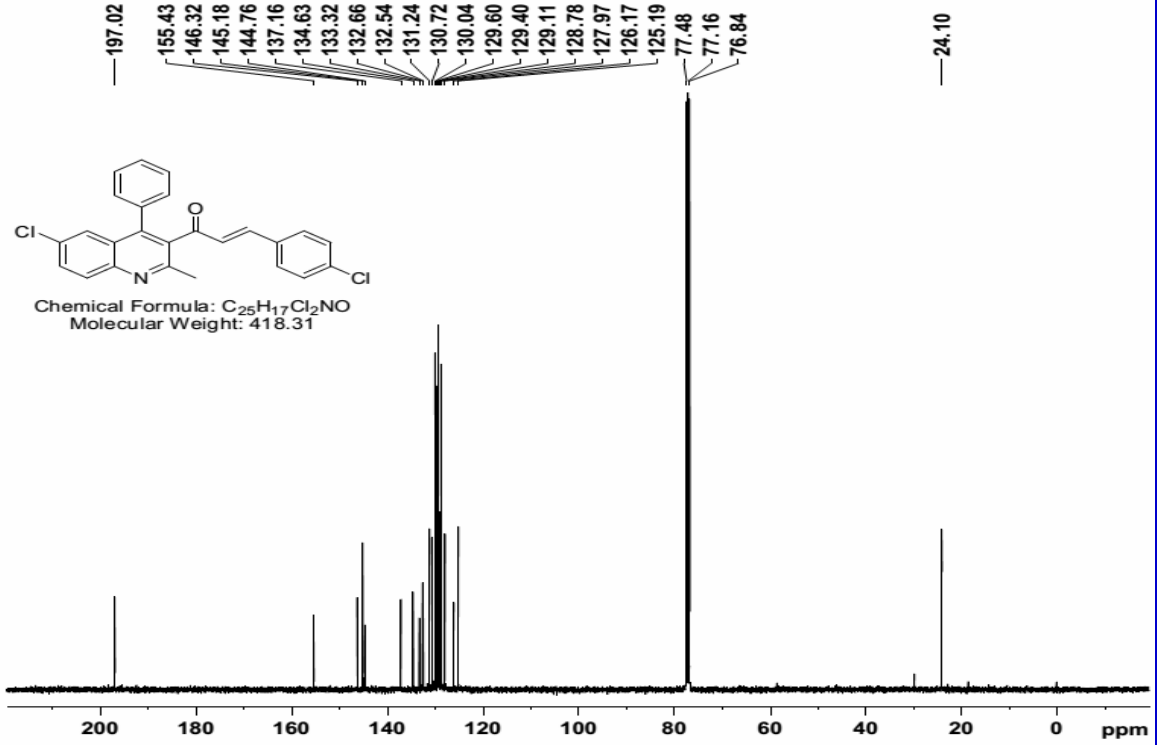

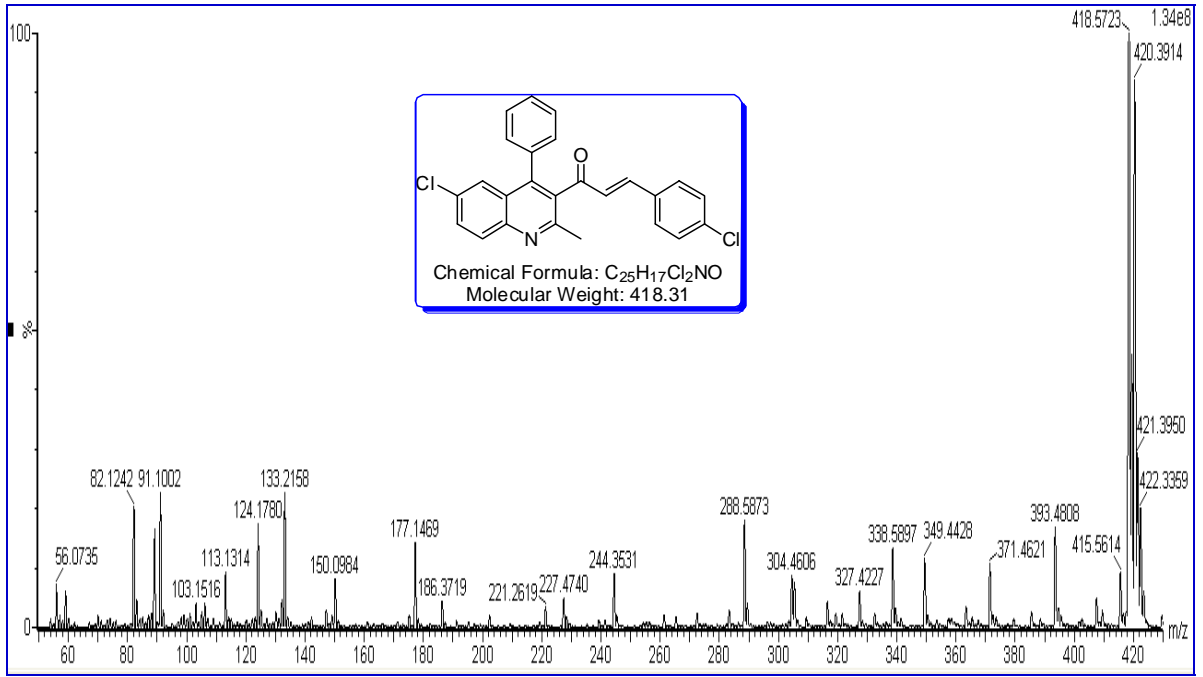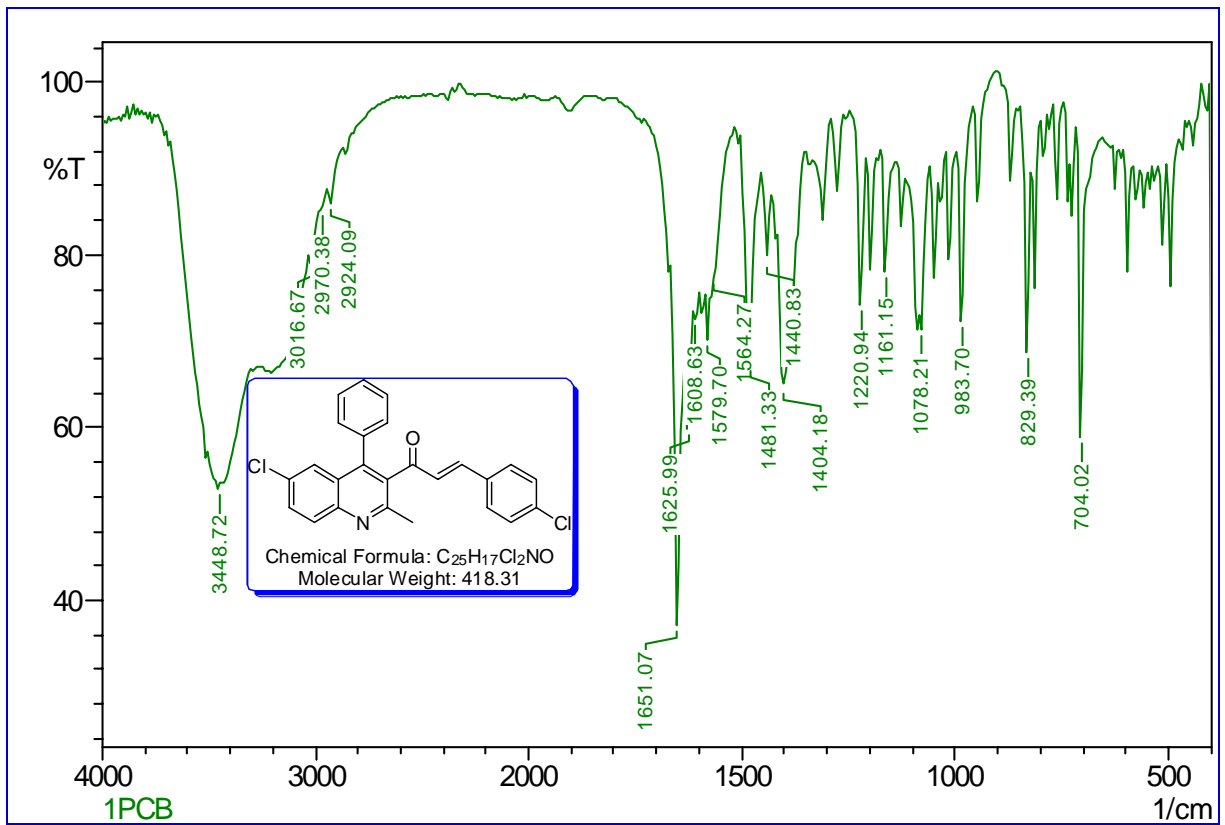

2M3A5CNAP

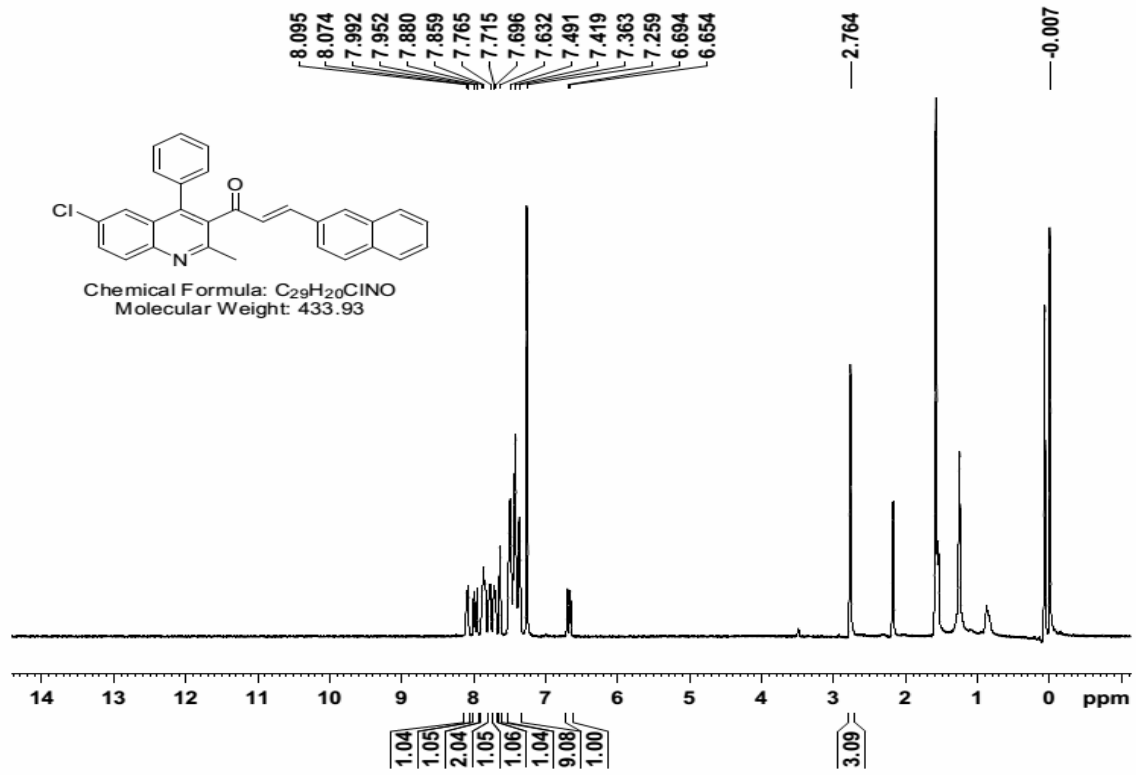

2M3A5CNAP

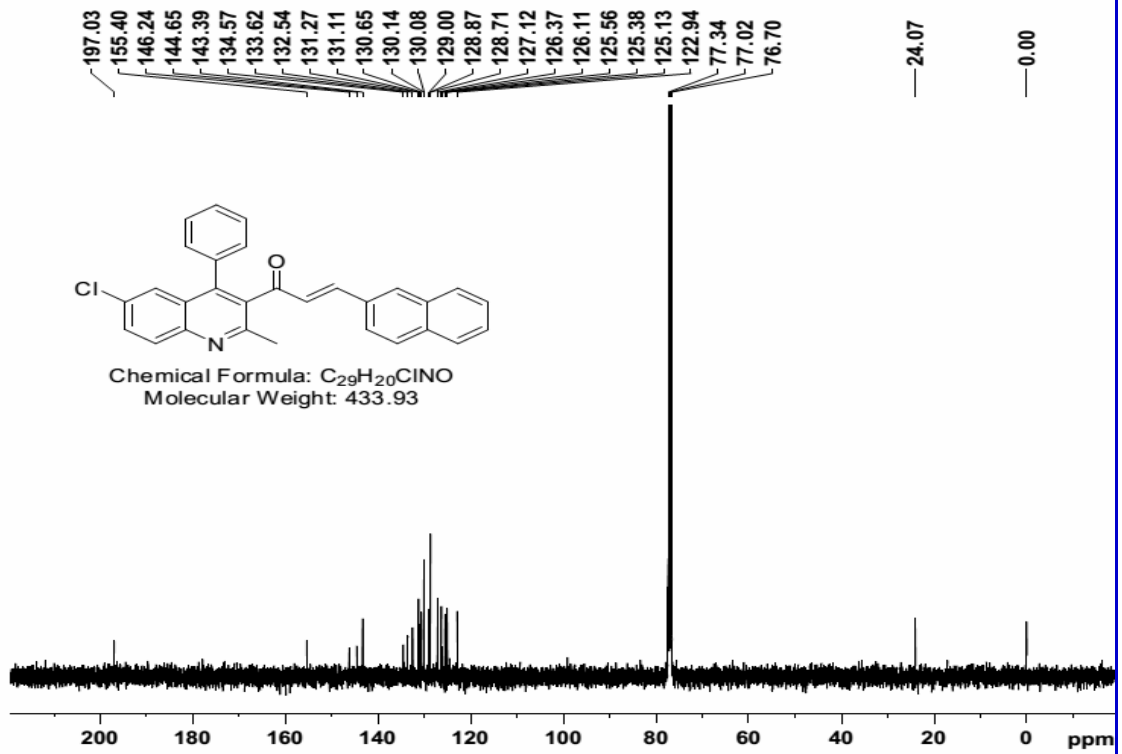

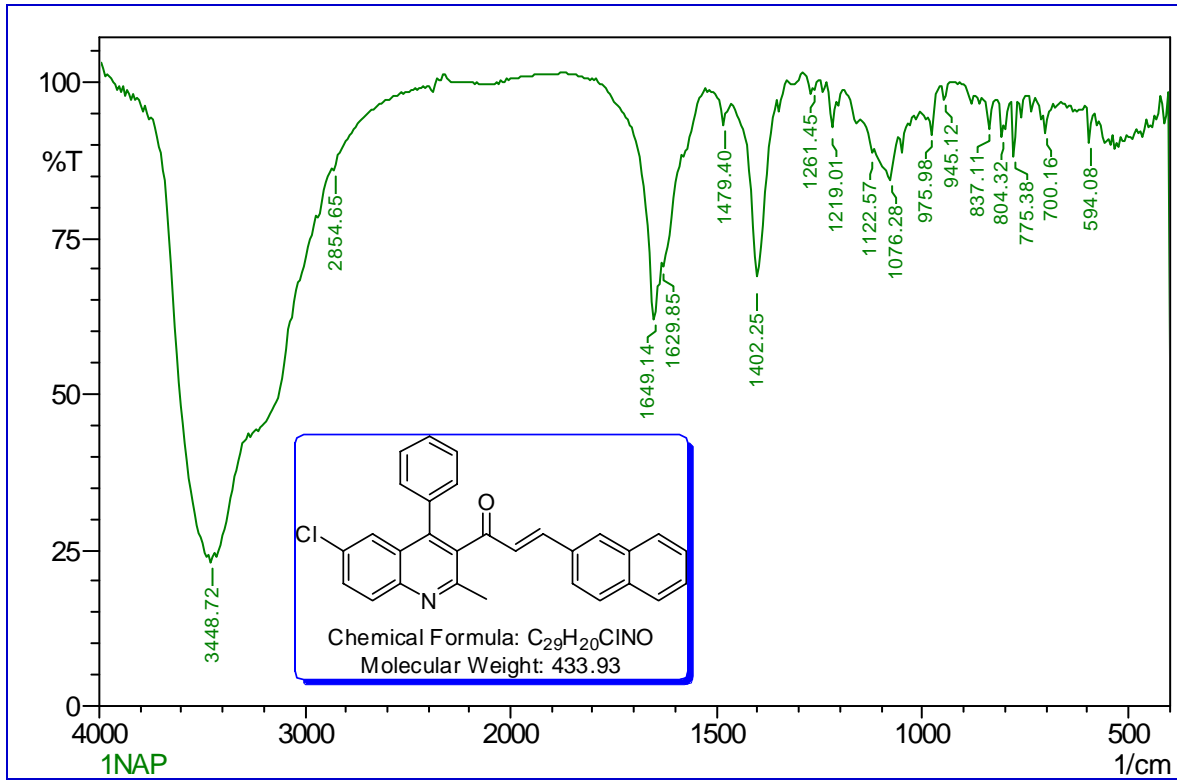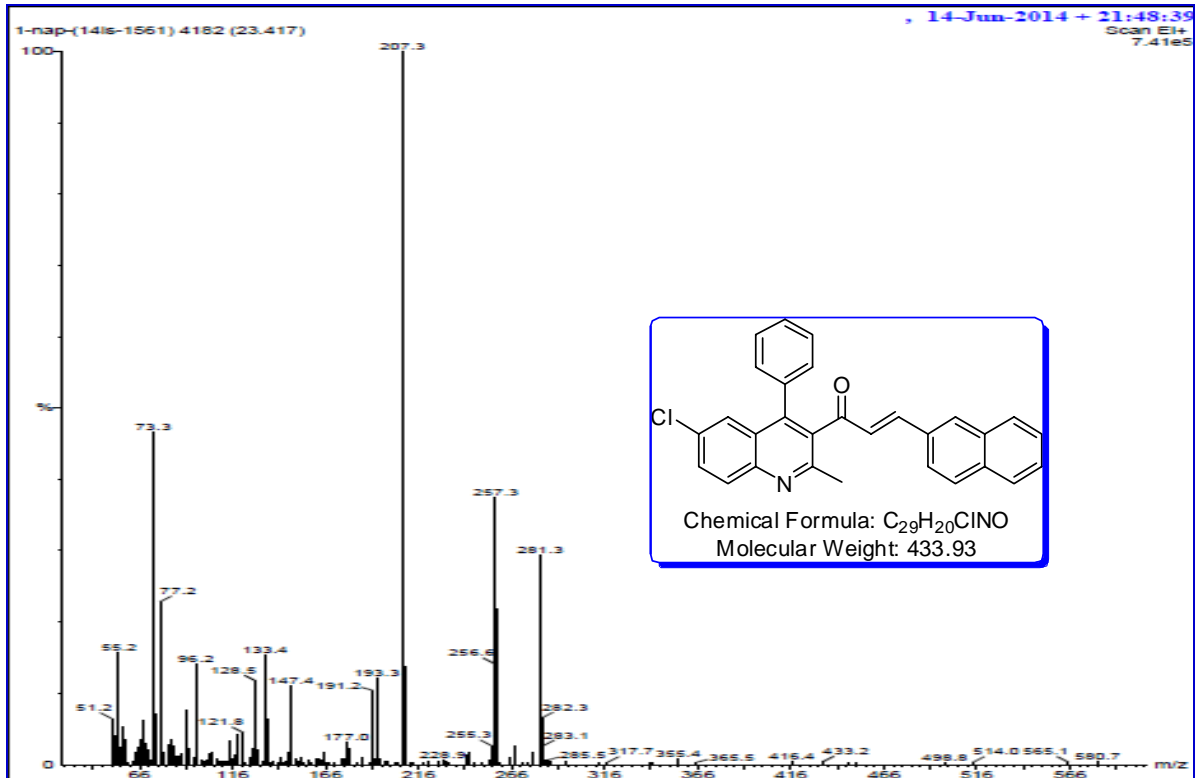

2M3A5CTHIO

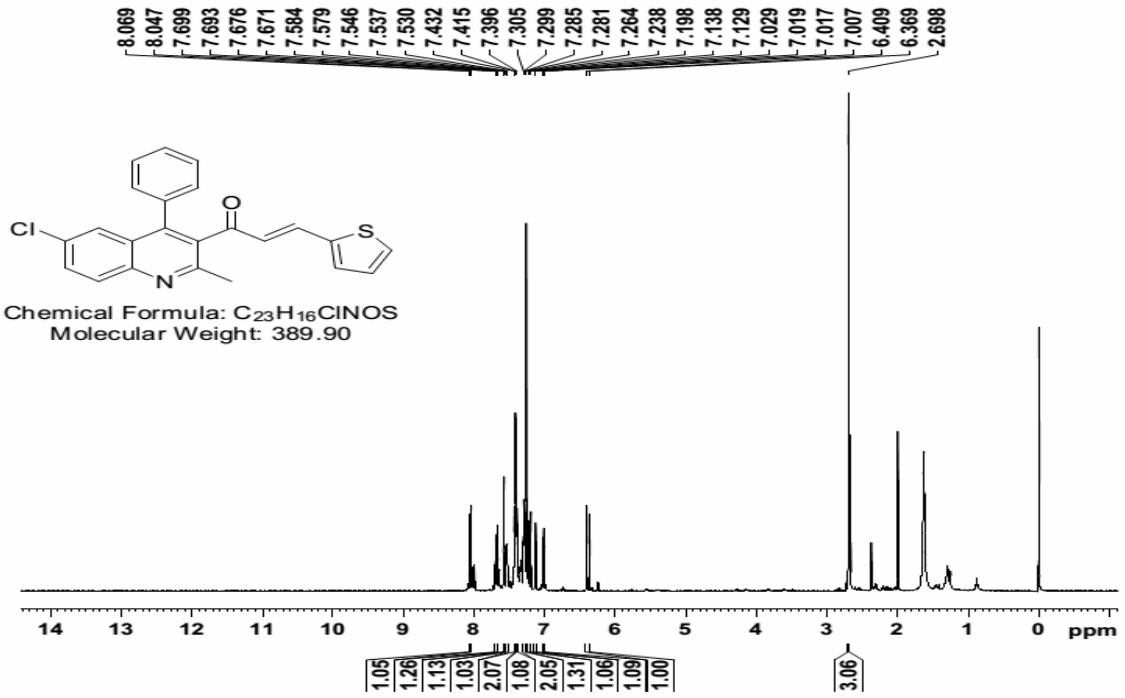

1THIO

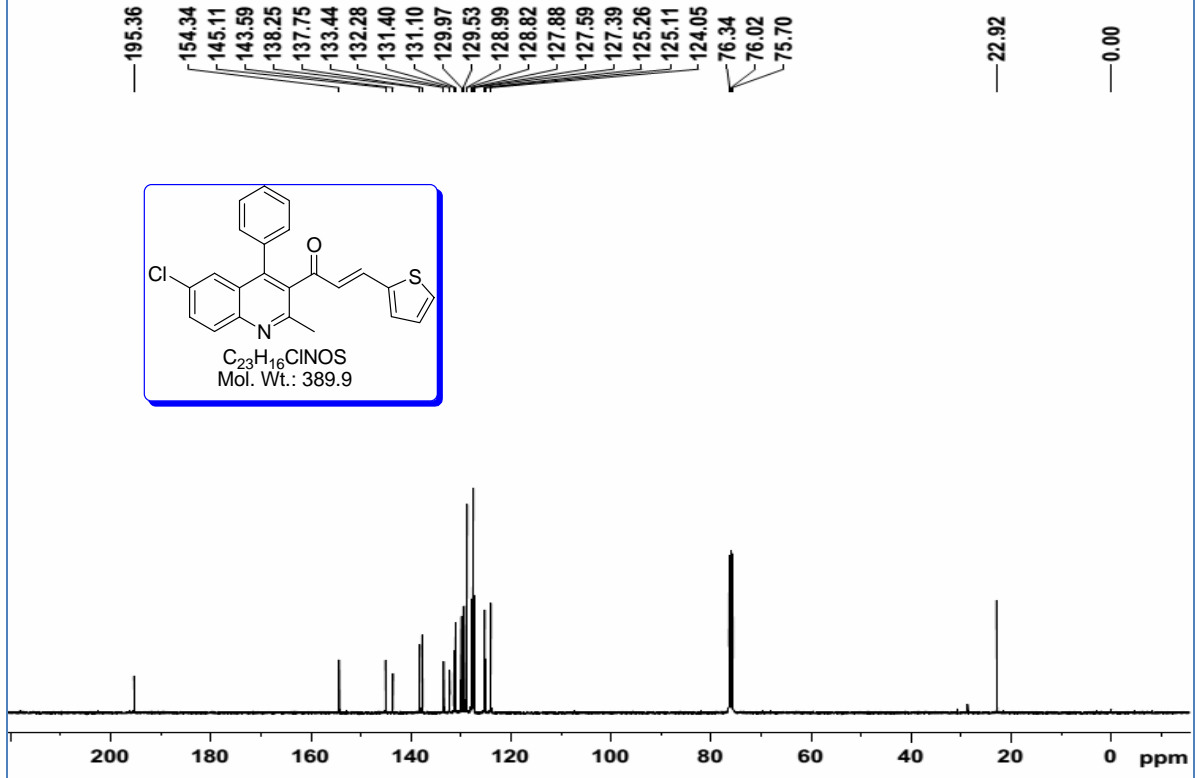

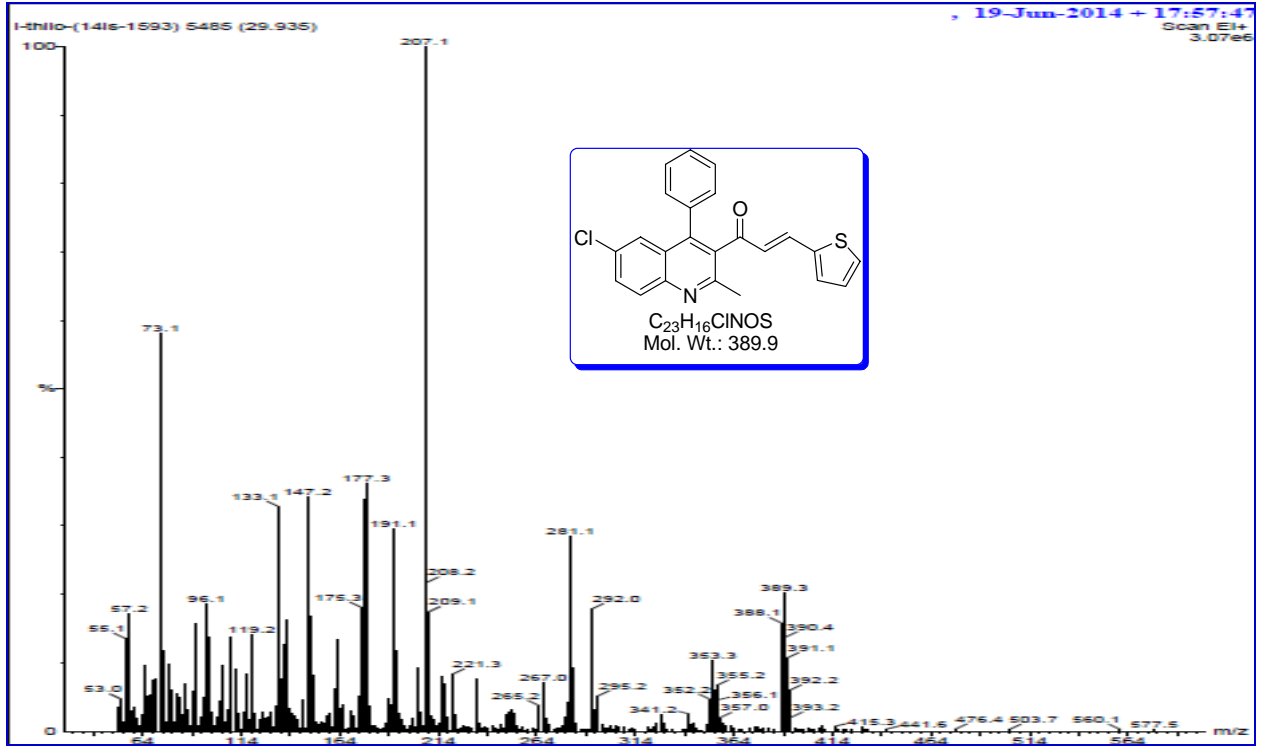



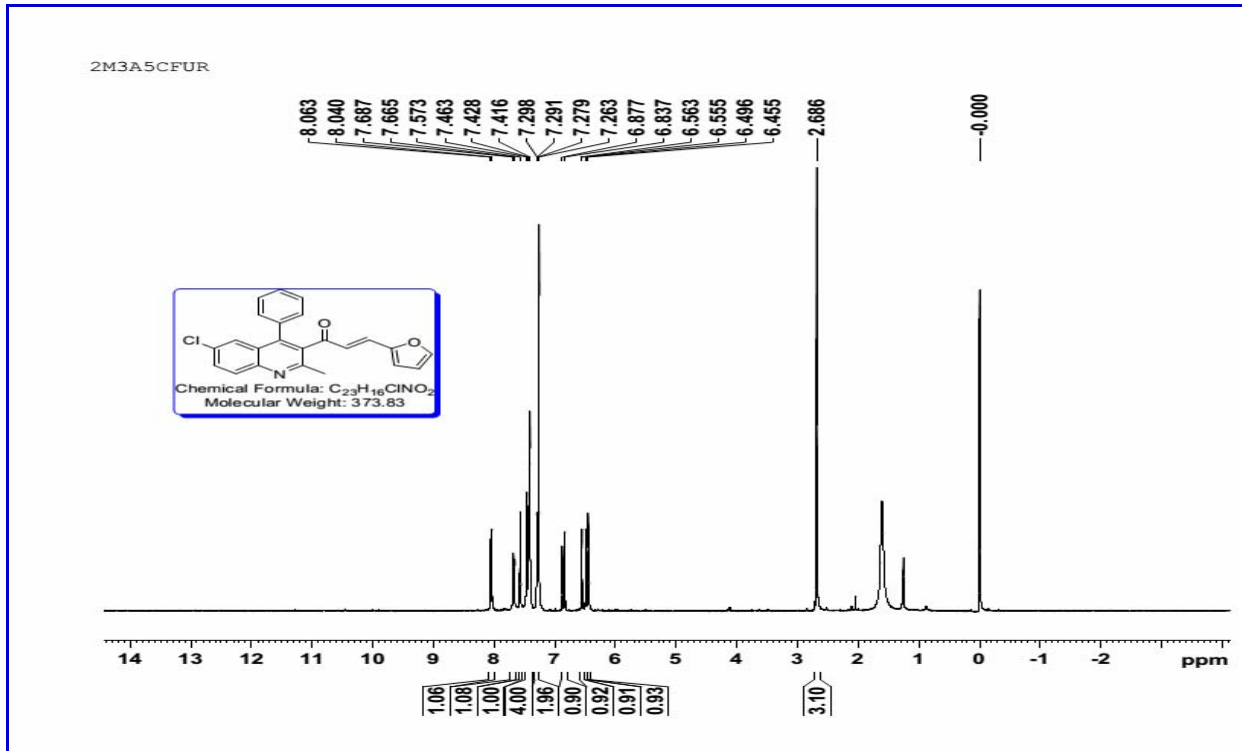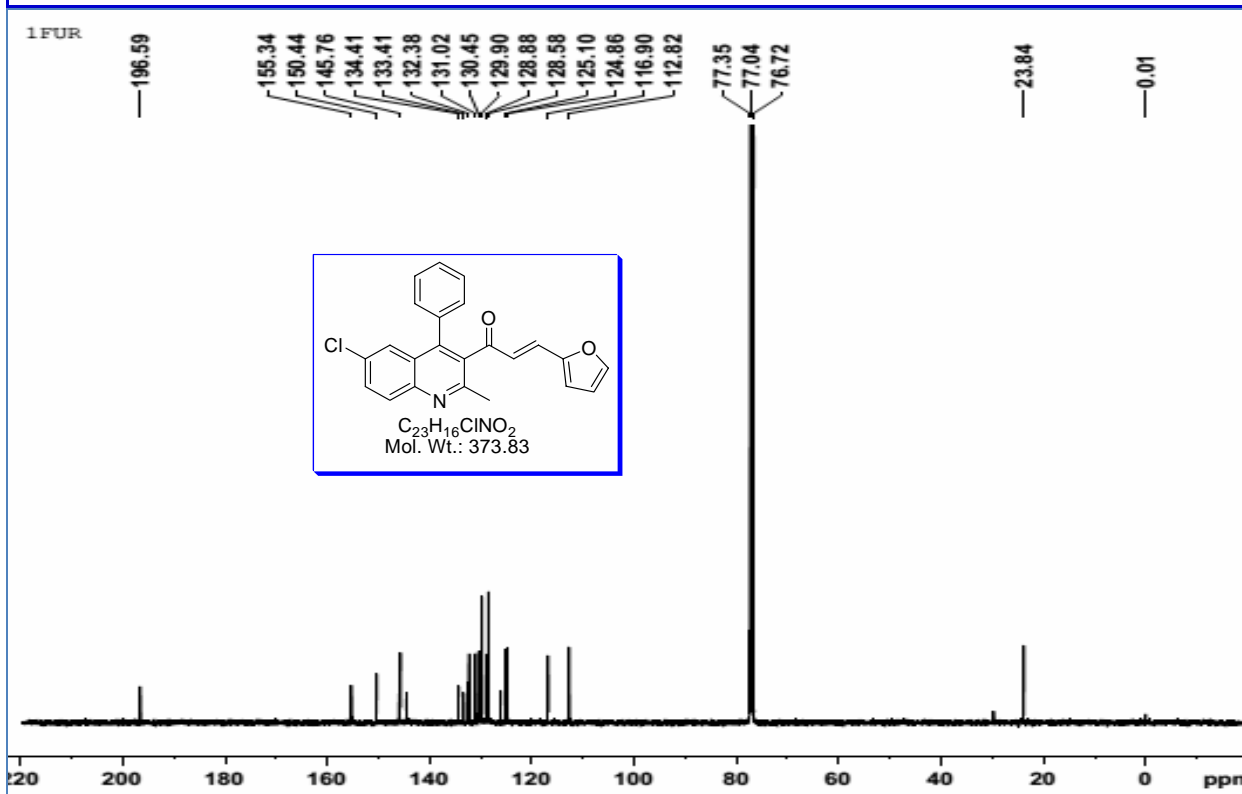

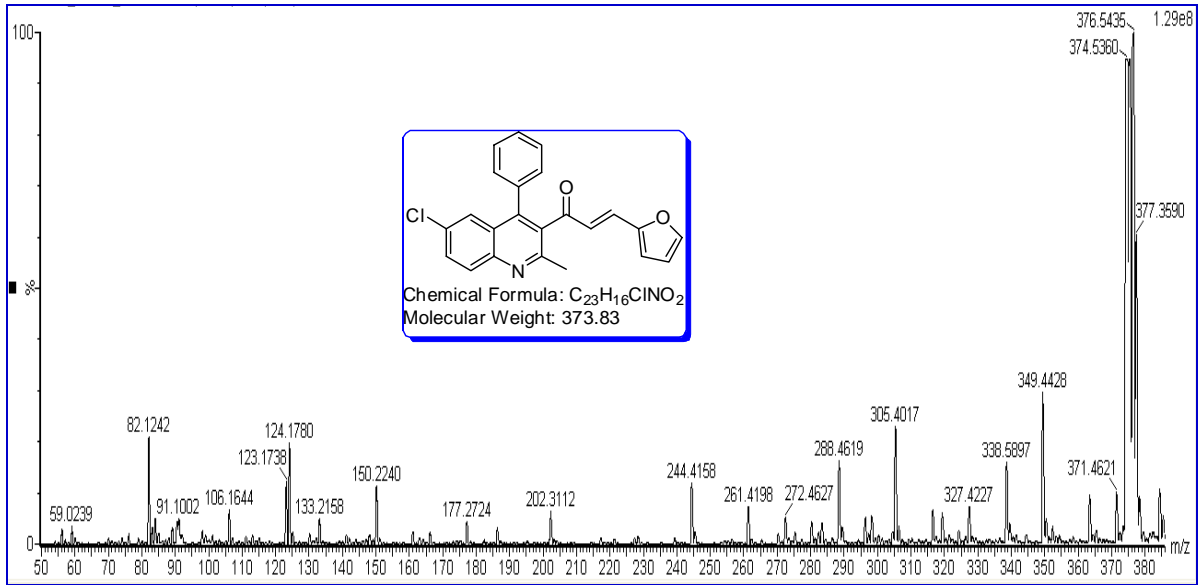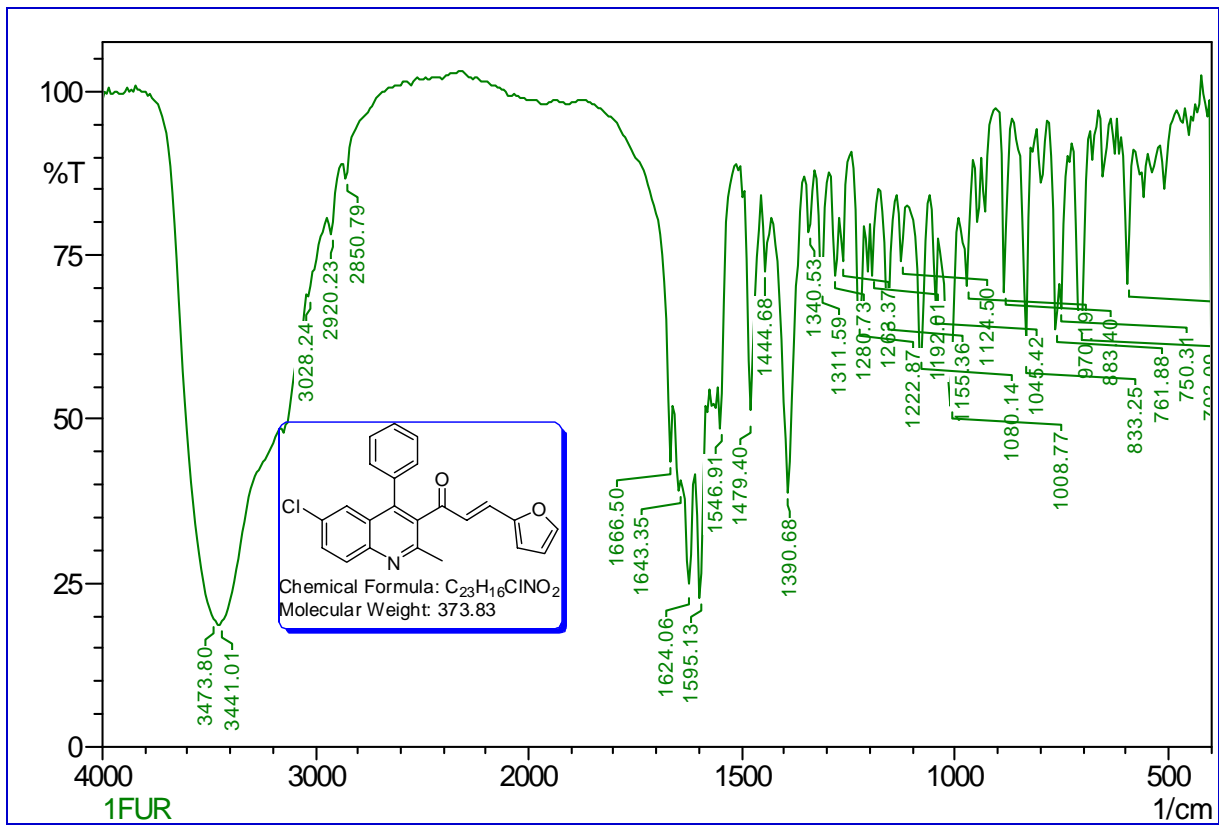

2M3A5CONAP

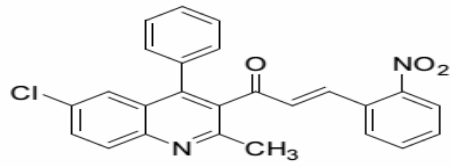

Chemical Formula:  $C_{25}H_{17}ClN_2O_3$   
Molecular Weight: 428.87

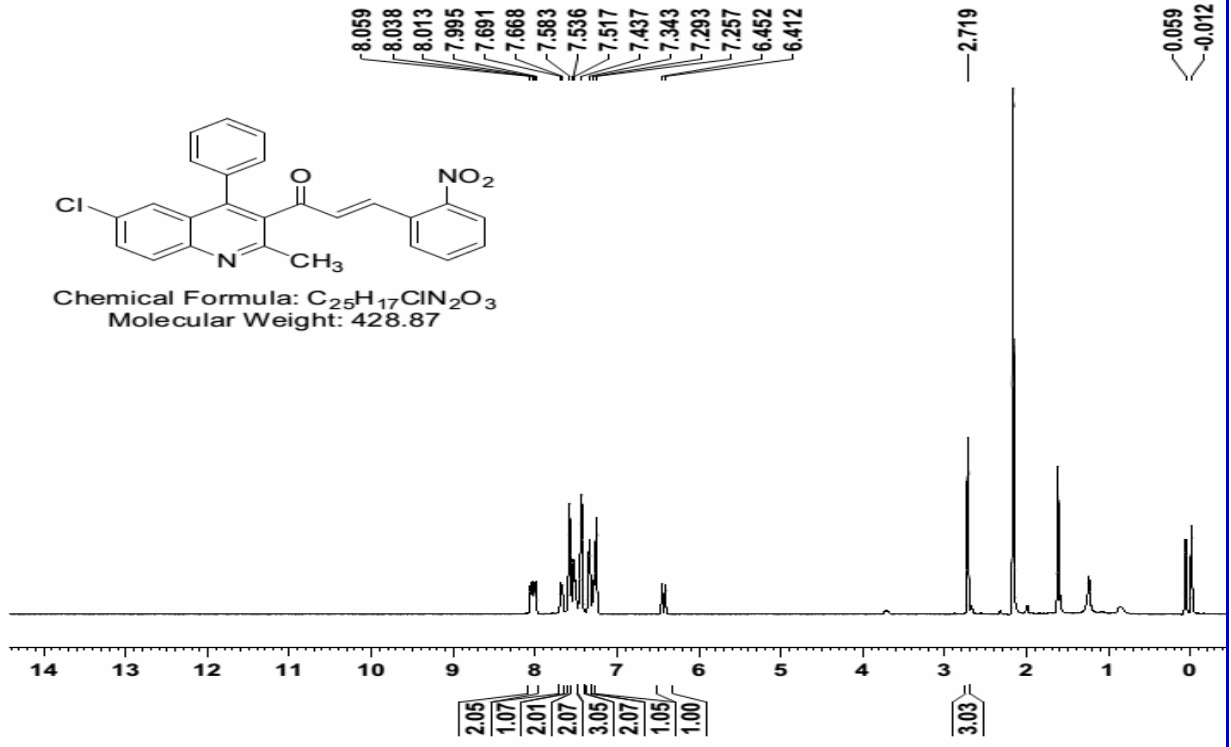

2M3A5CONAP

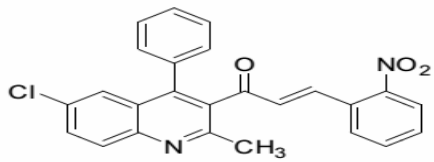

Chemical Formula:  $C_{25}H_{17}ClN_2O_3$   
Molecular Weight: 428.87

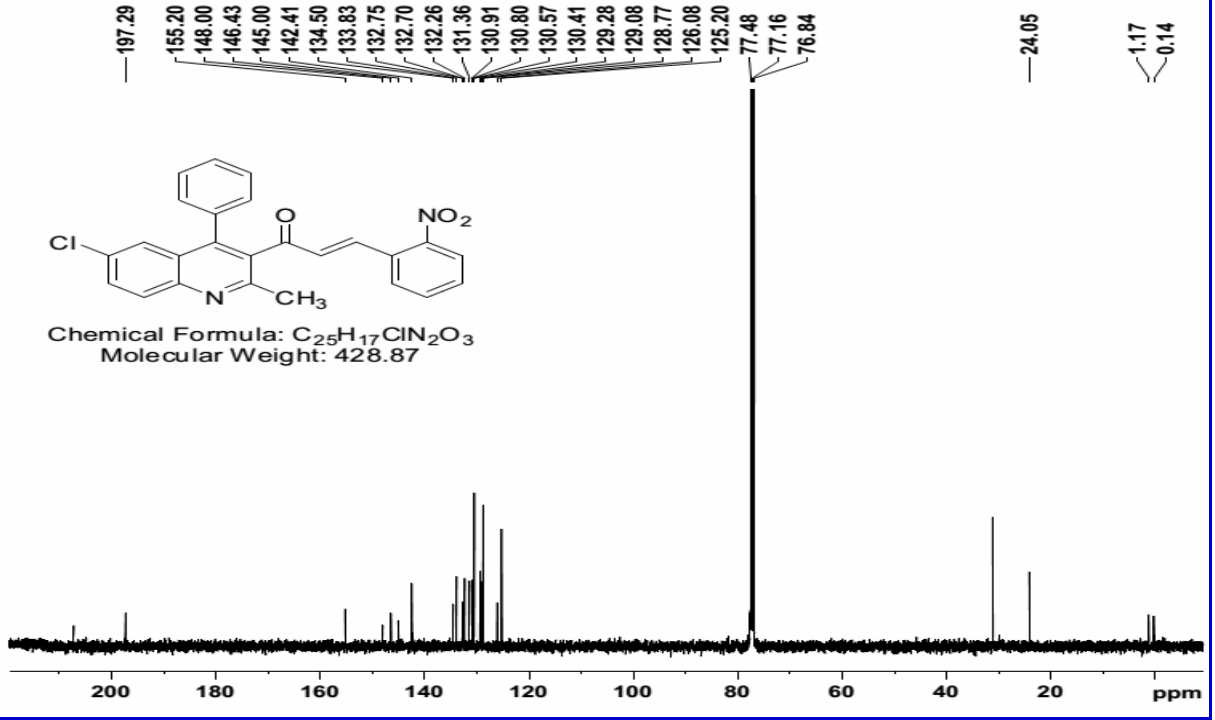

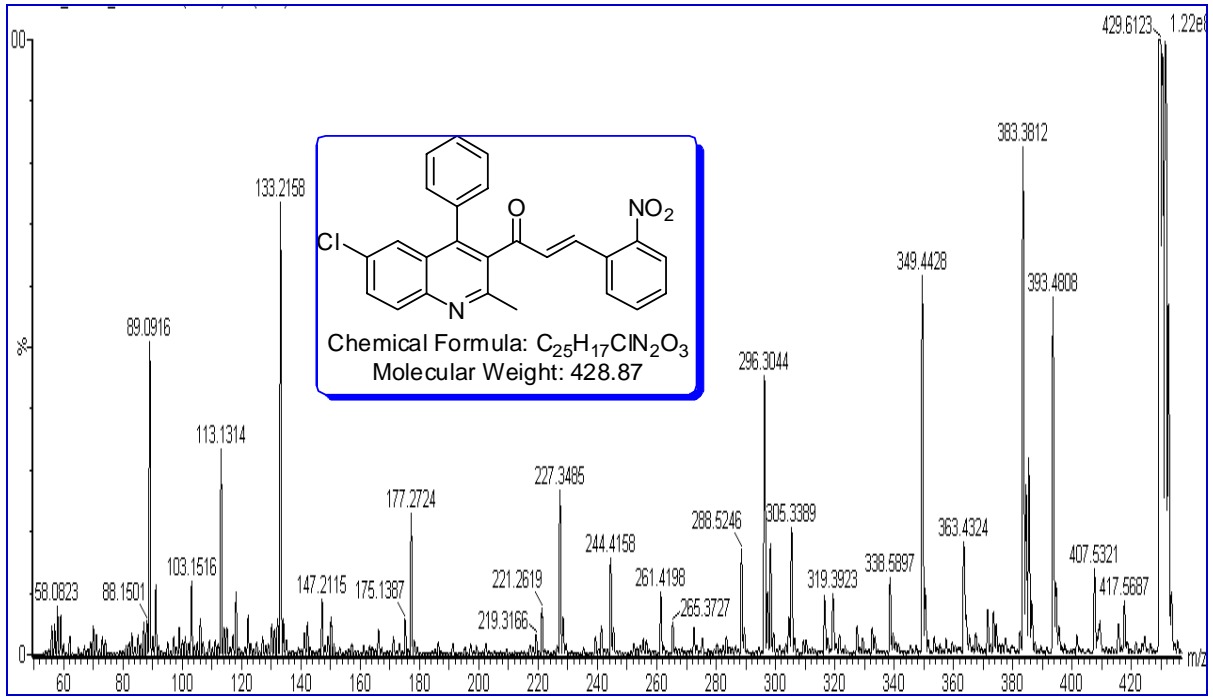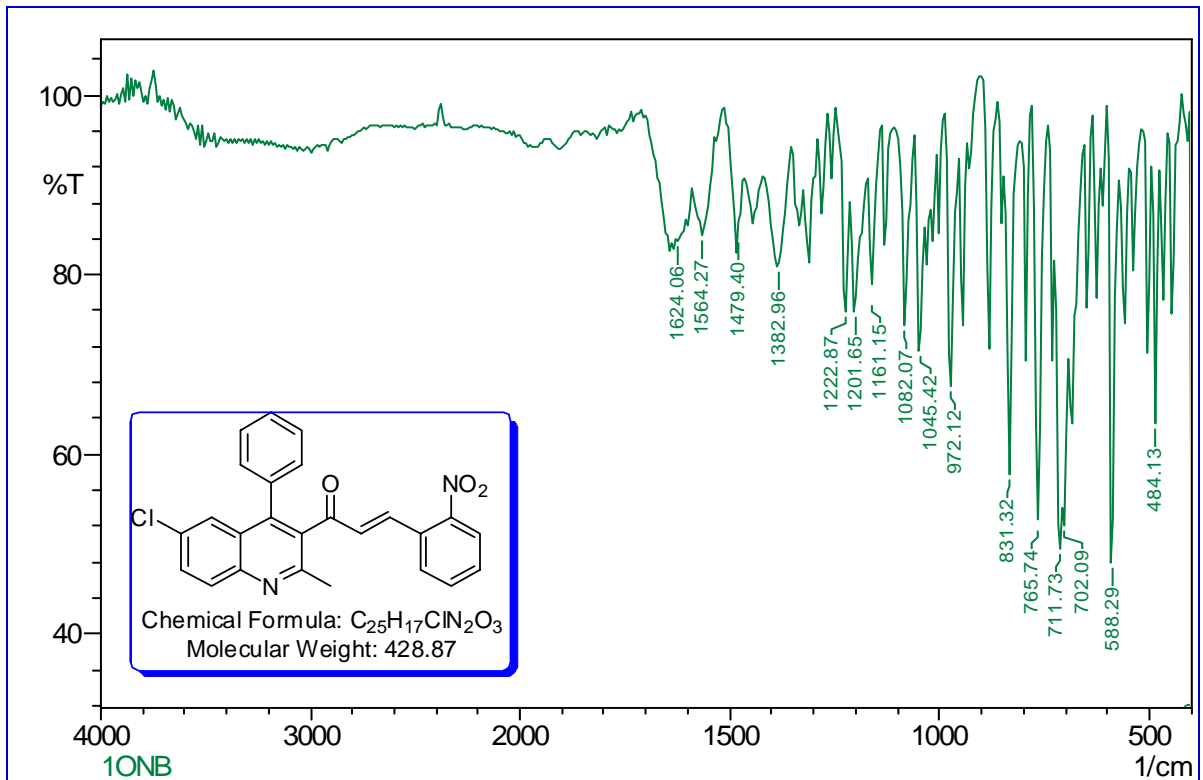

2M3A5CDMB

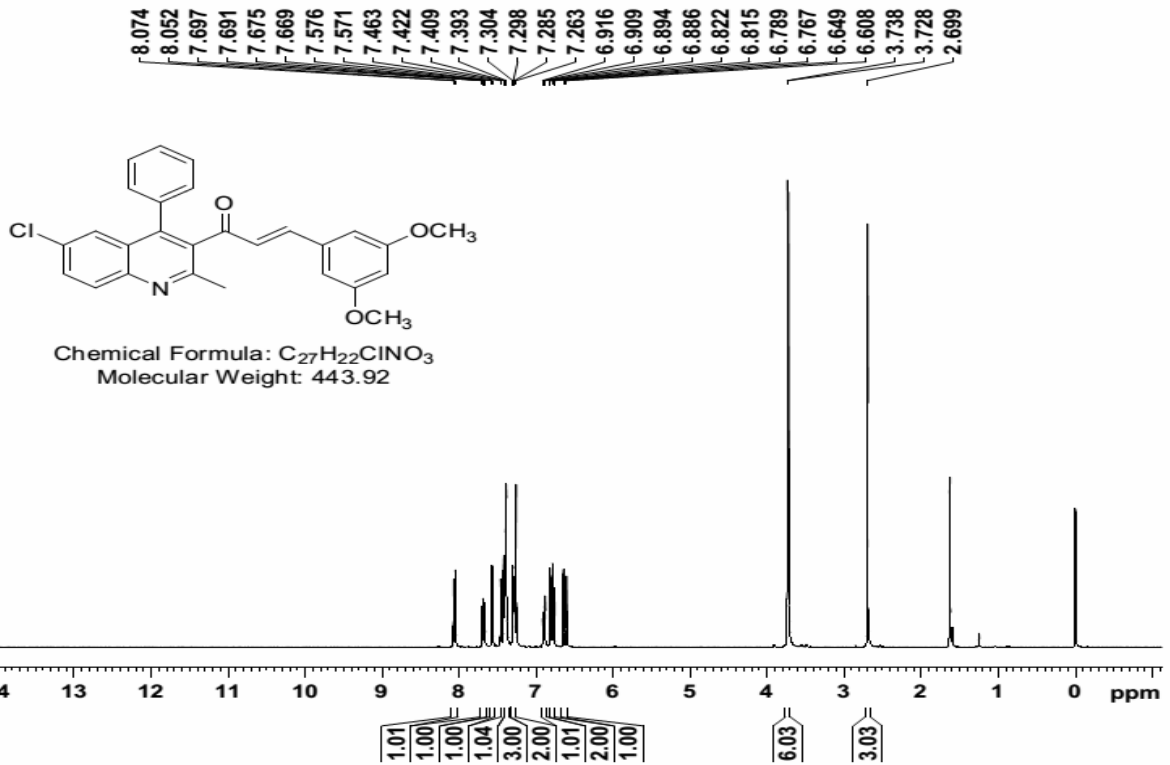

2M3A5CDMB

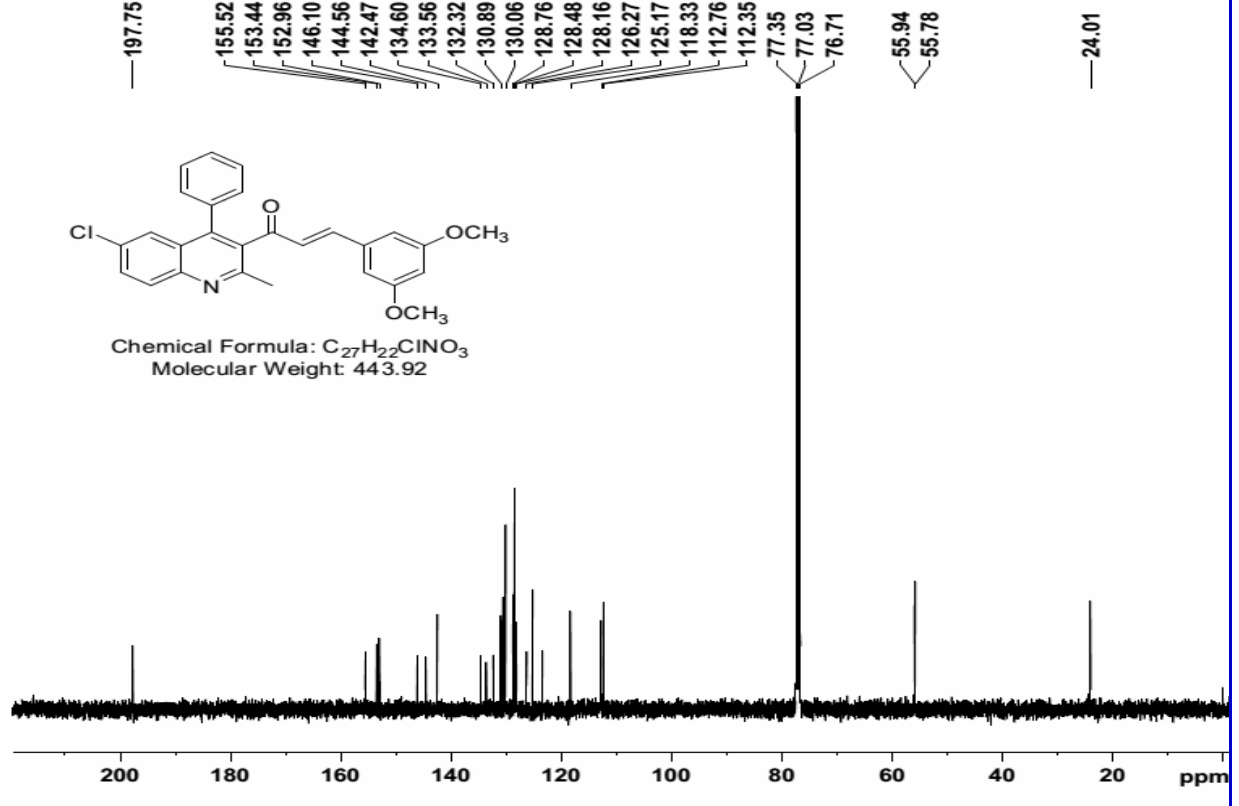

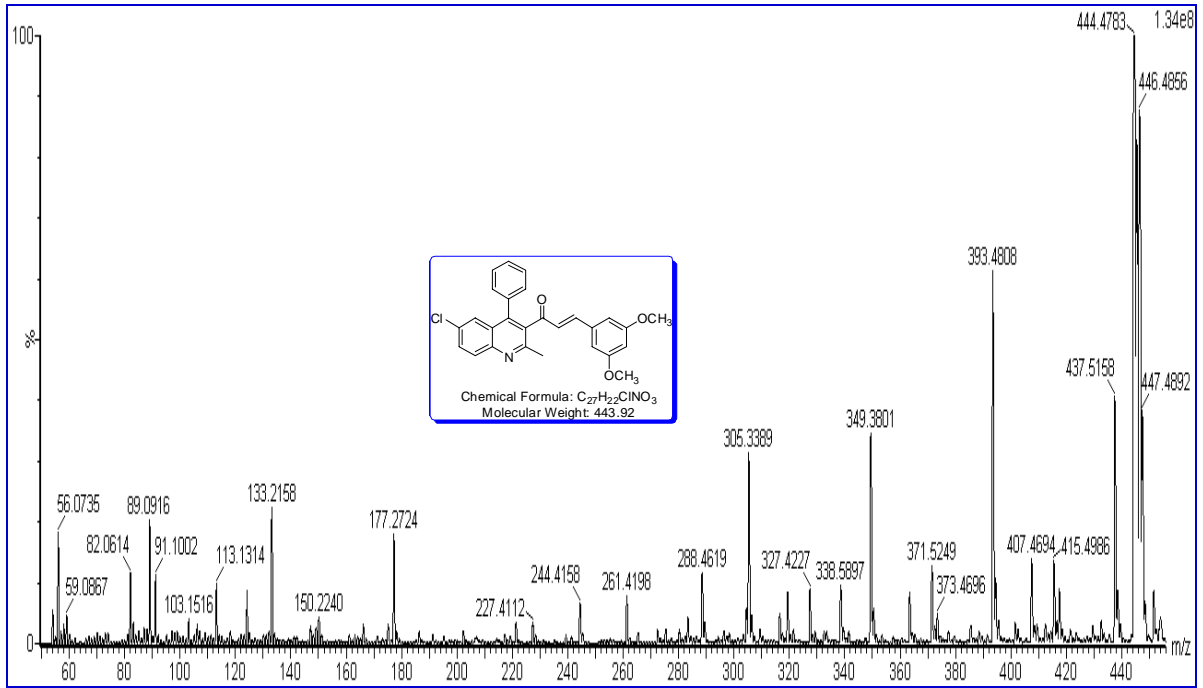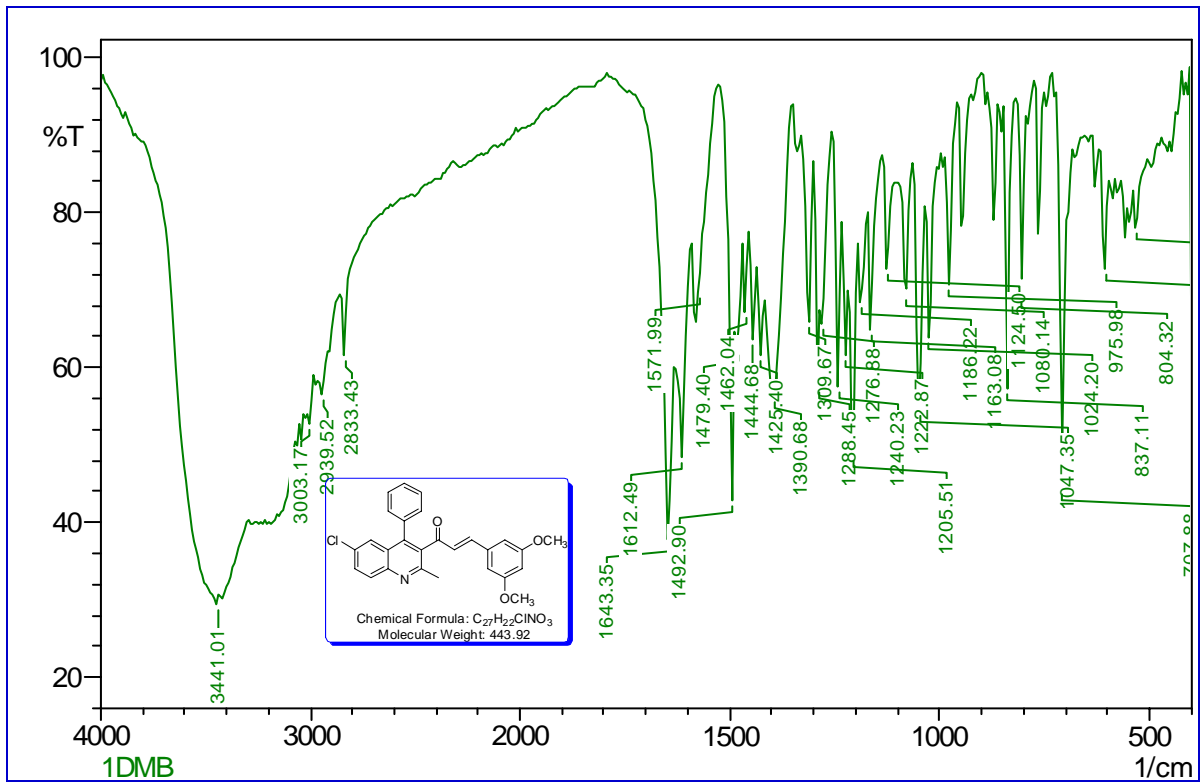

2M3A5CPDMAB

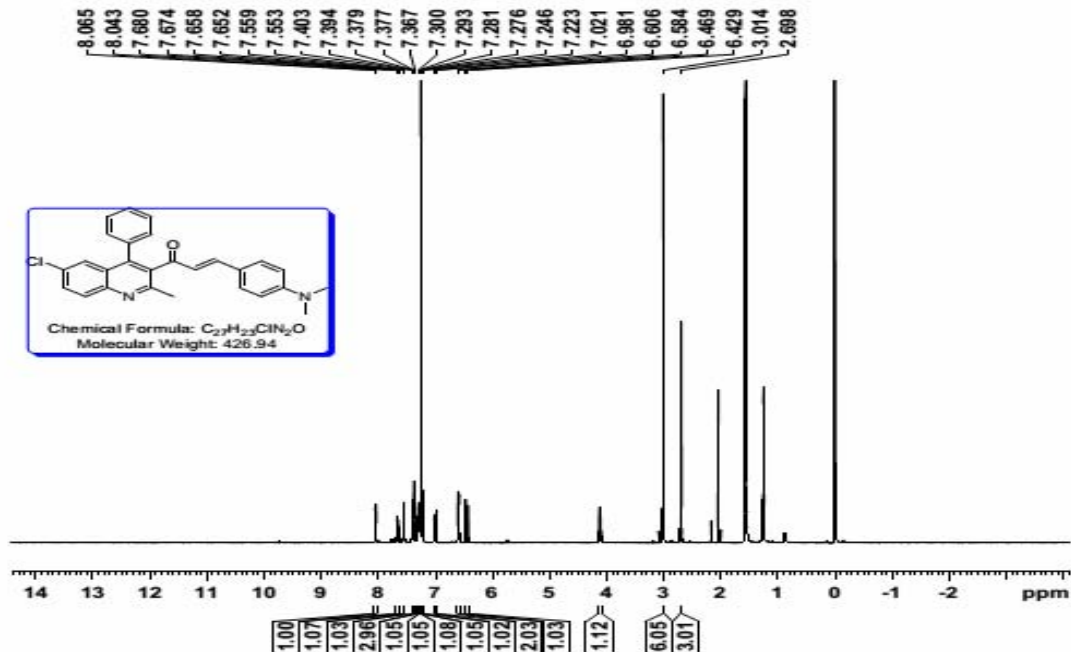

1-NNDMB

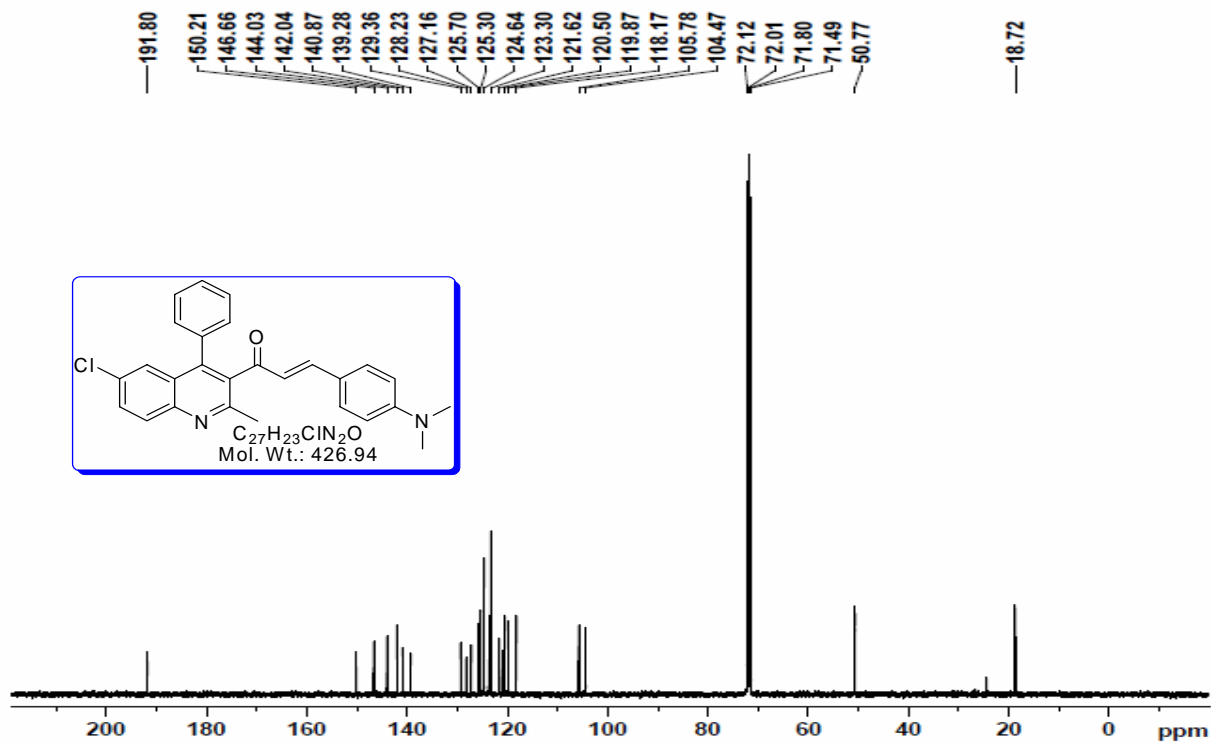

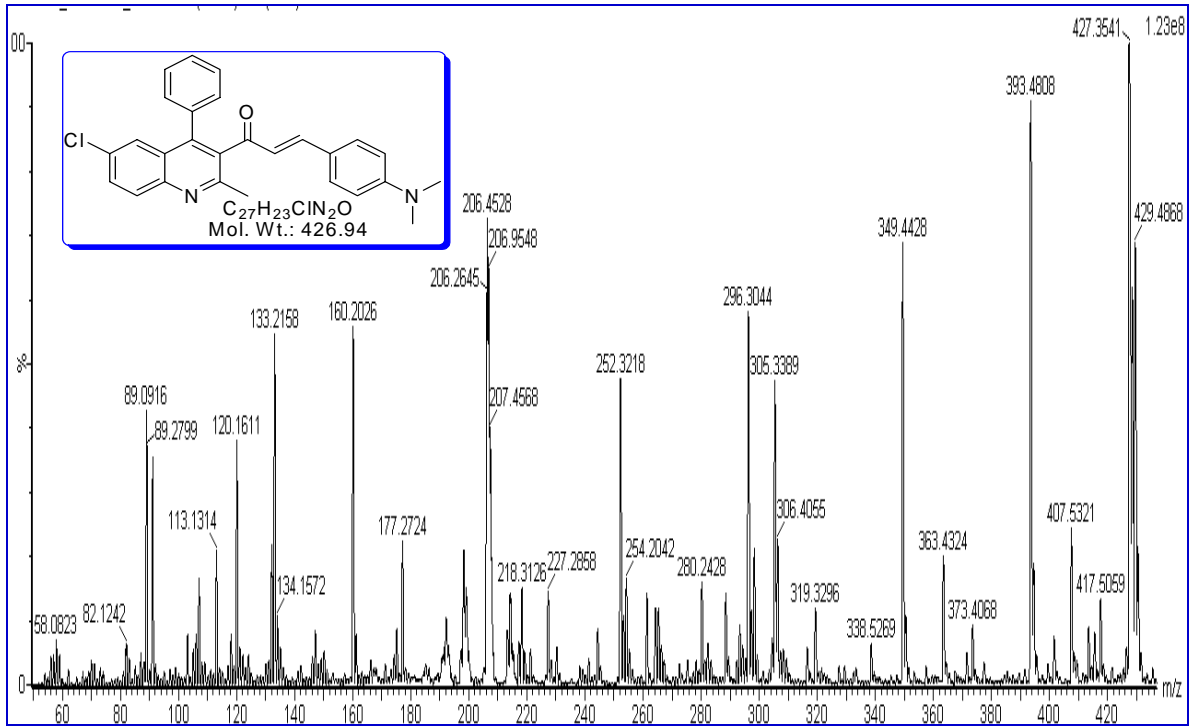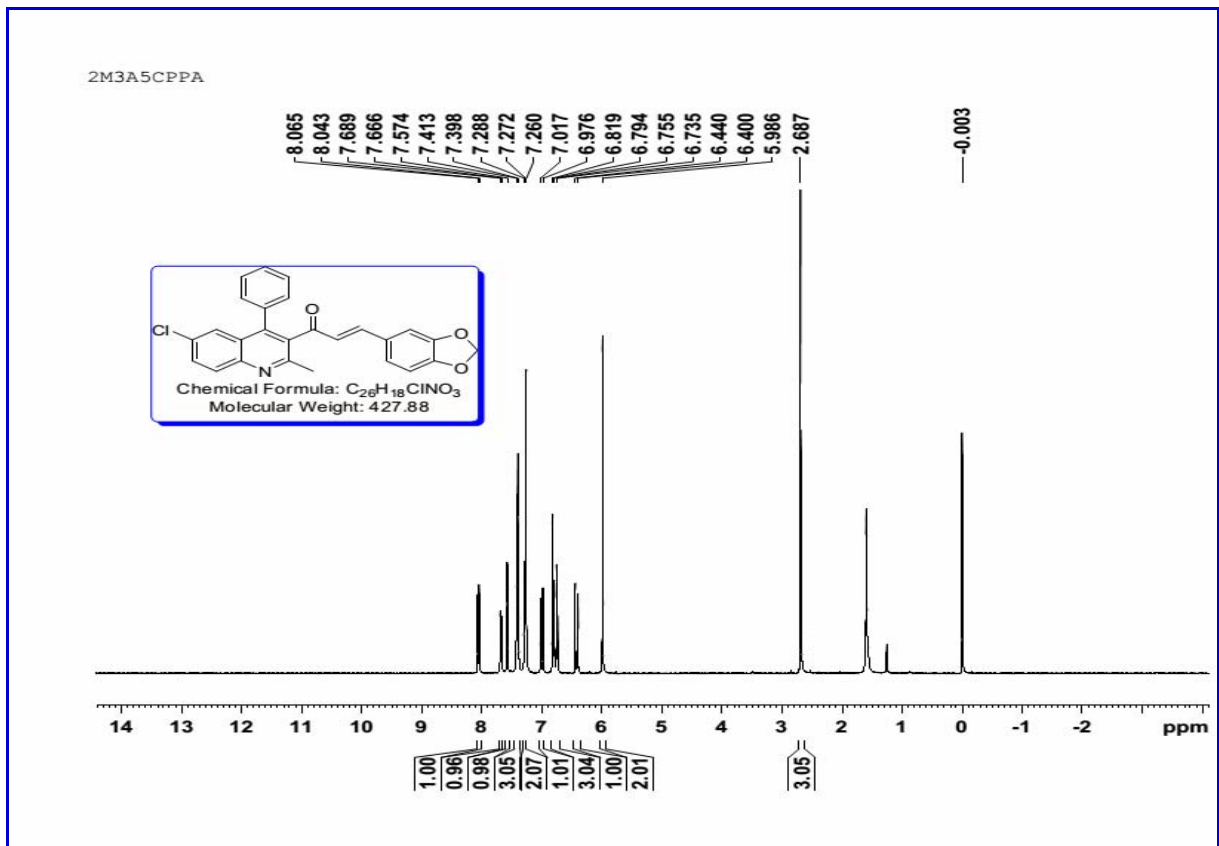



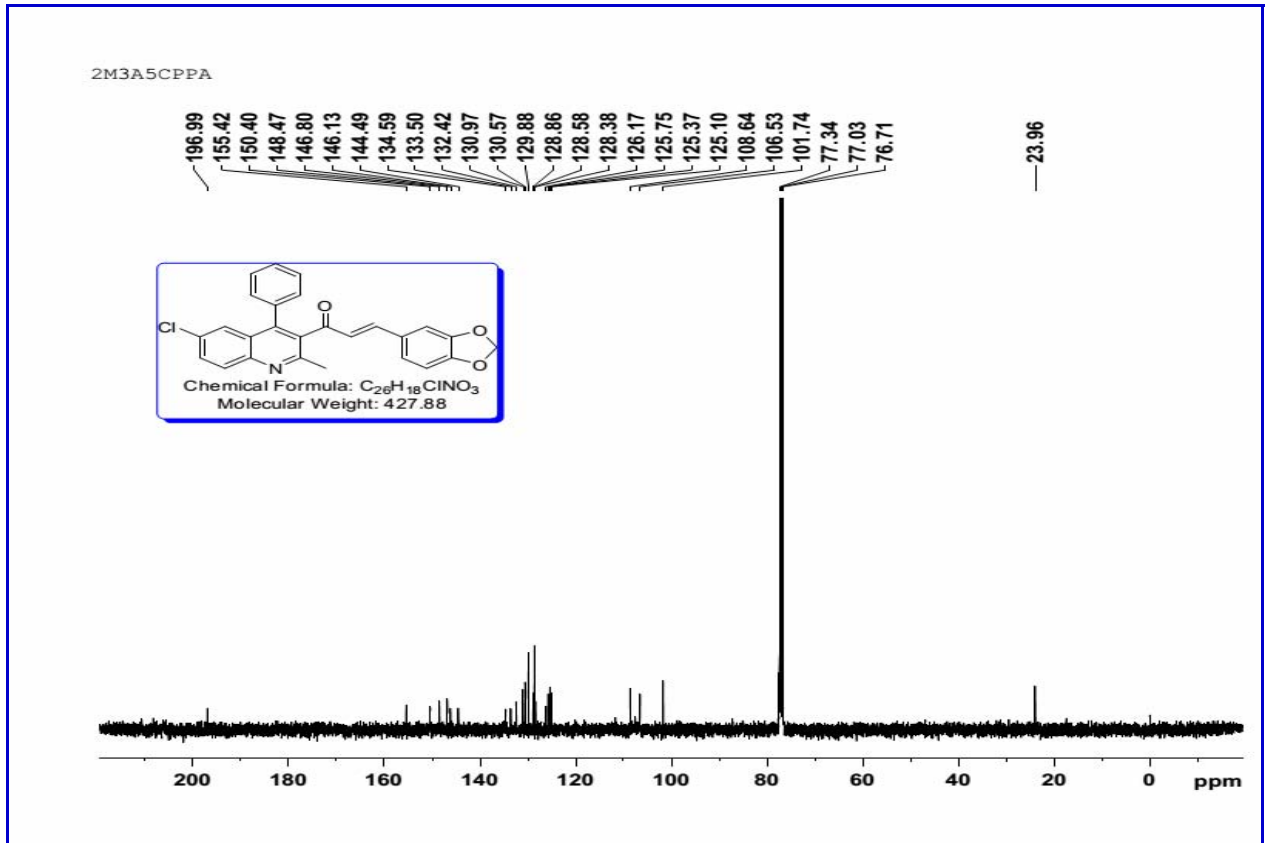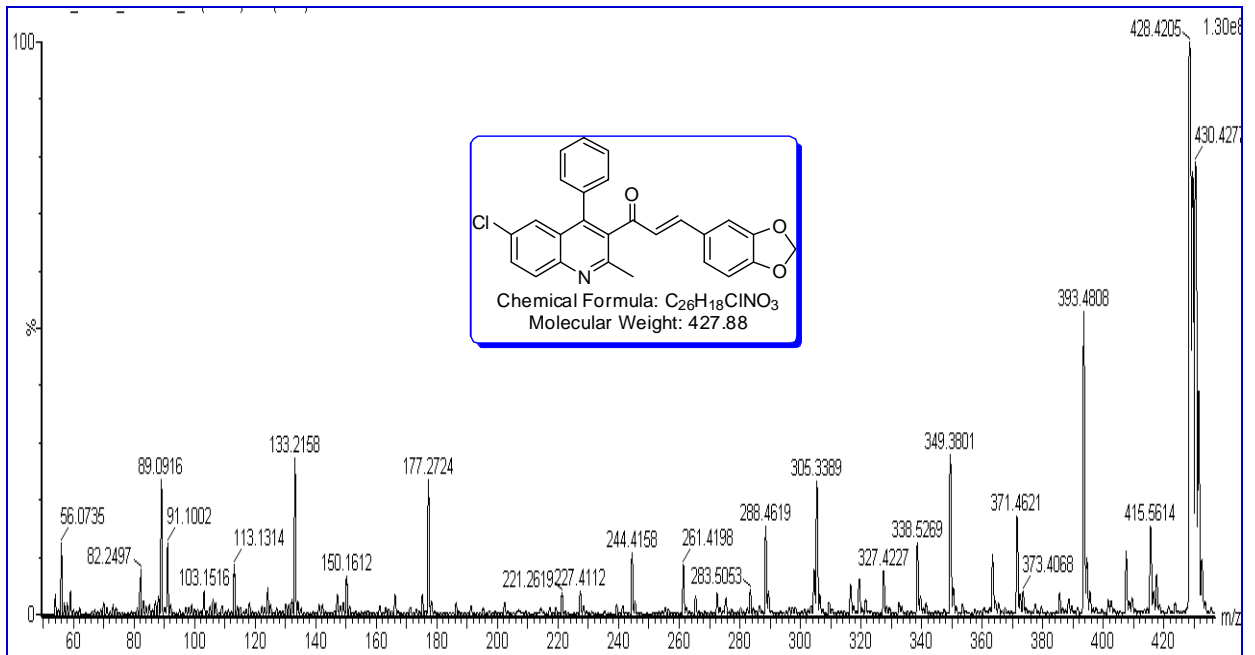

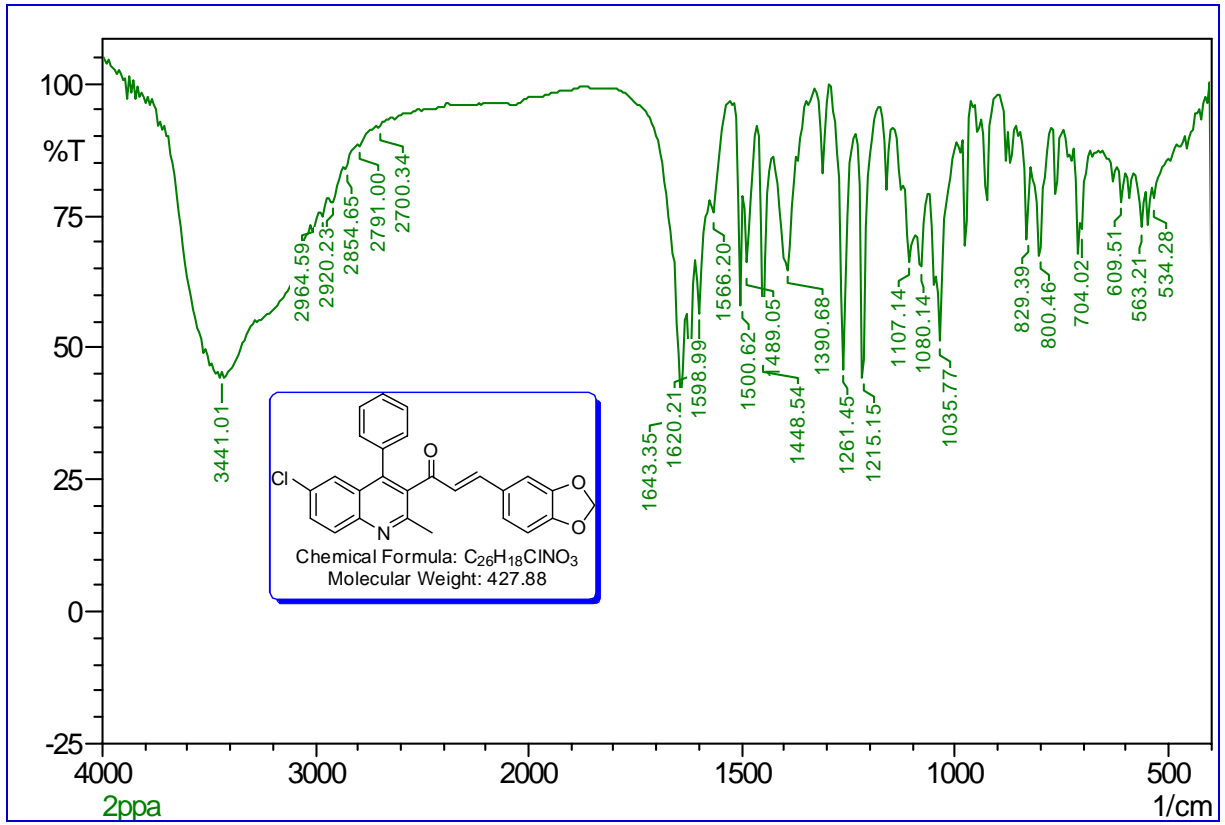

2M3ADCBEN

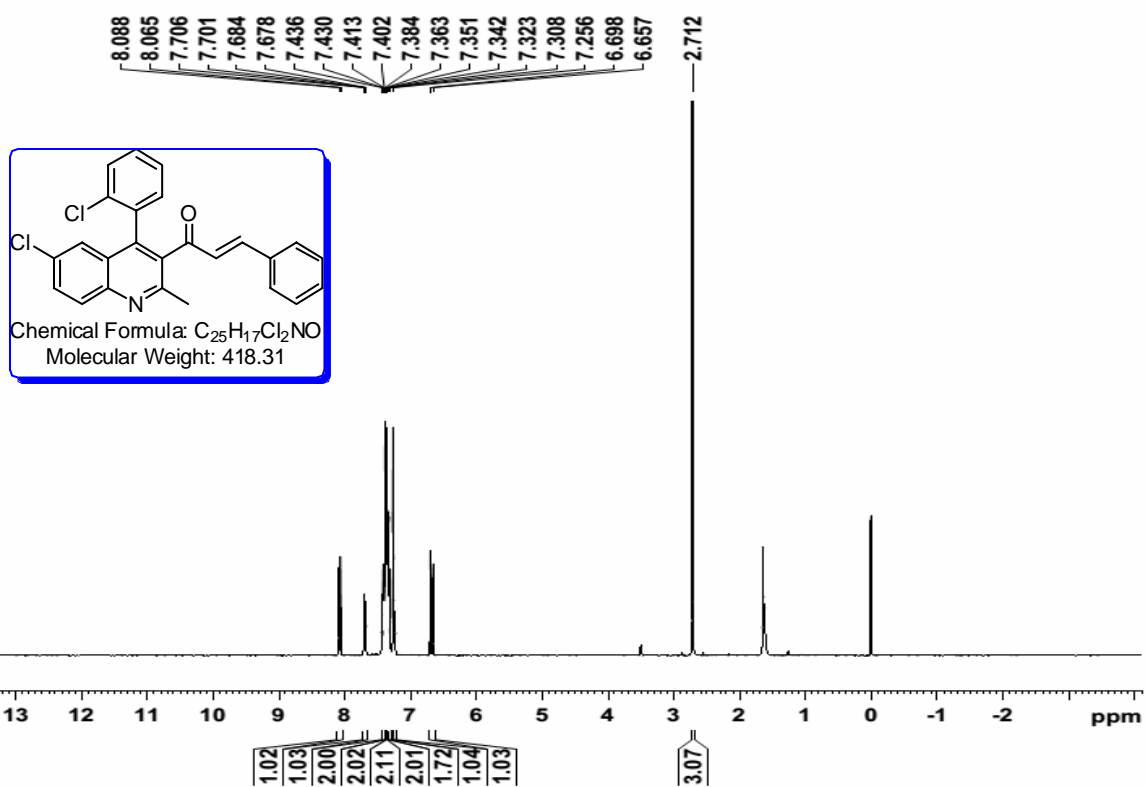

2M3ADCBEN

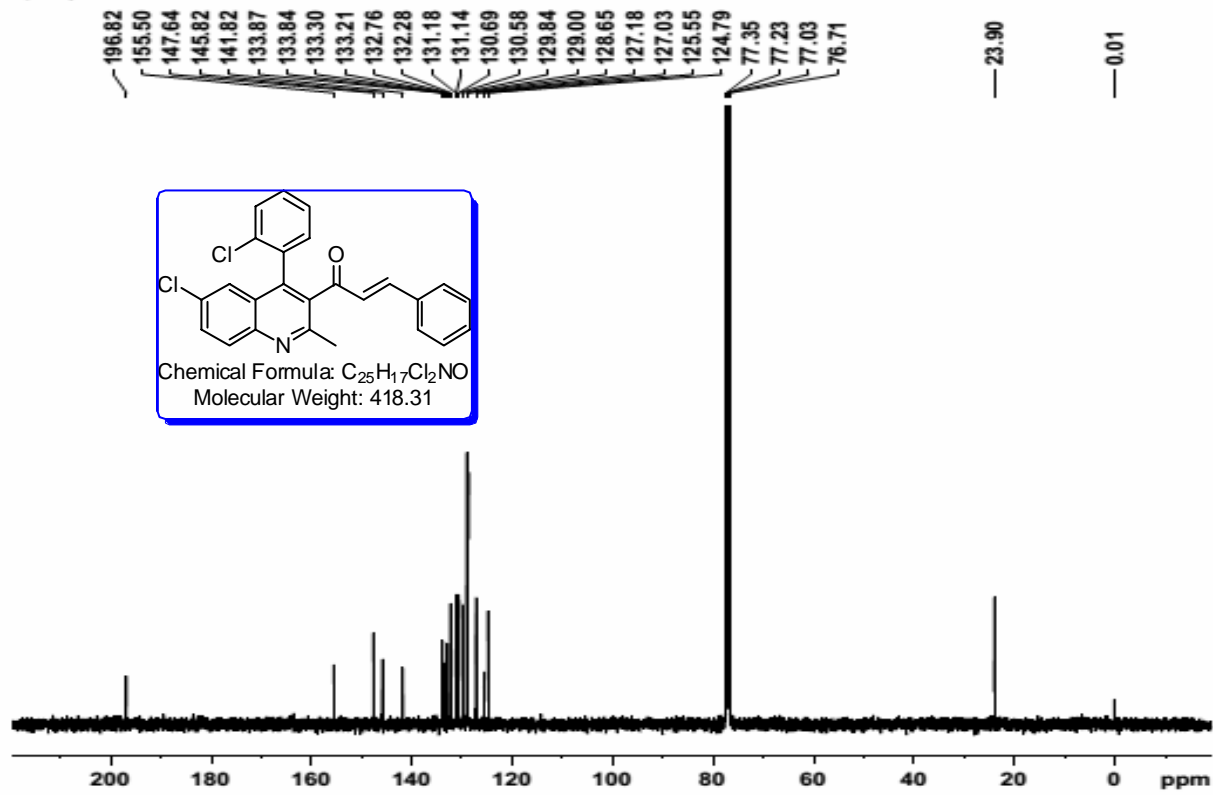

20140616\_2-B\_CONE40 4 (0.335) Cm (1:11)

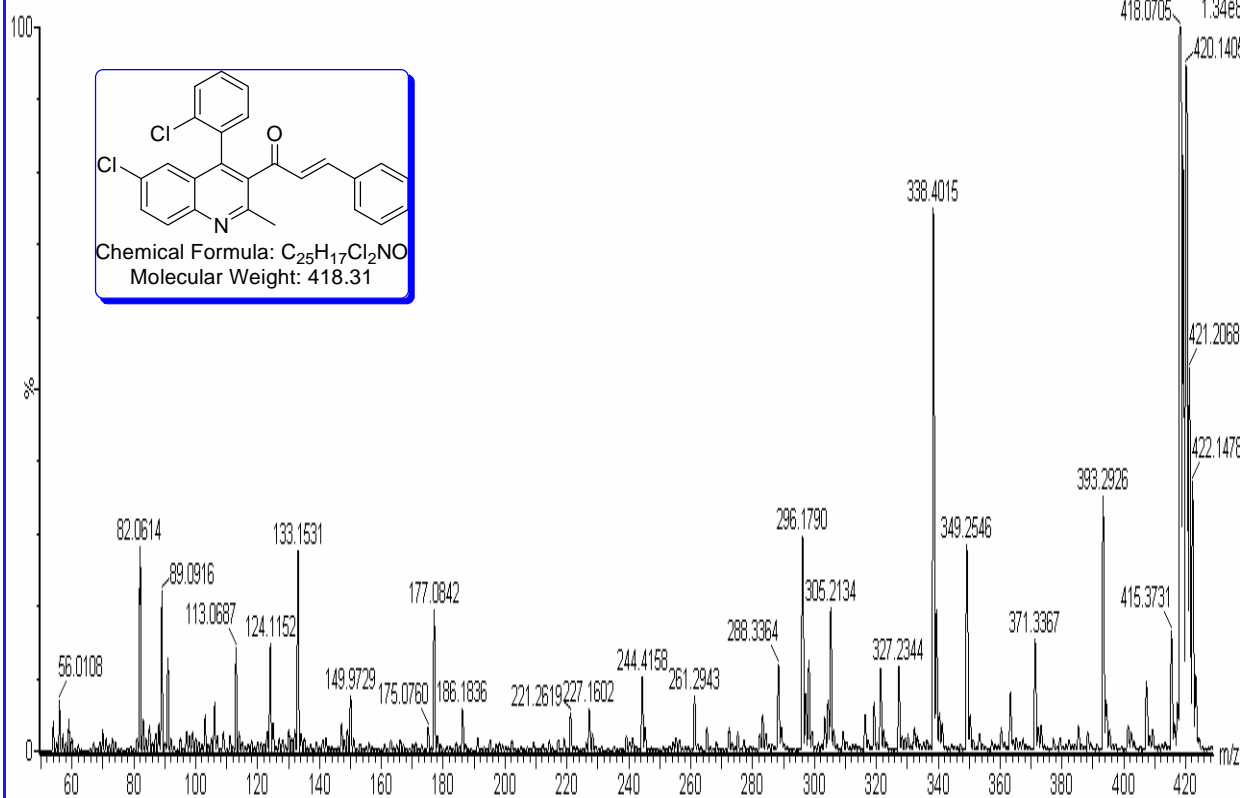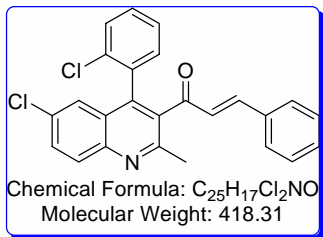

2M3ADCPCB

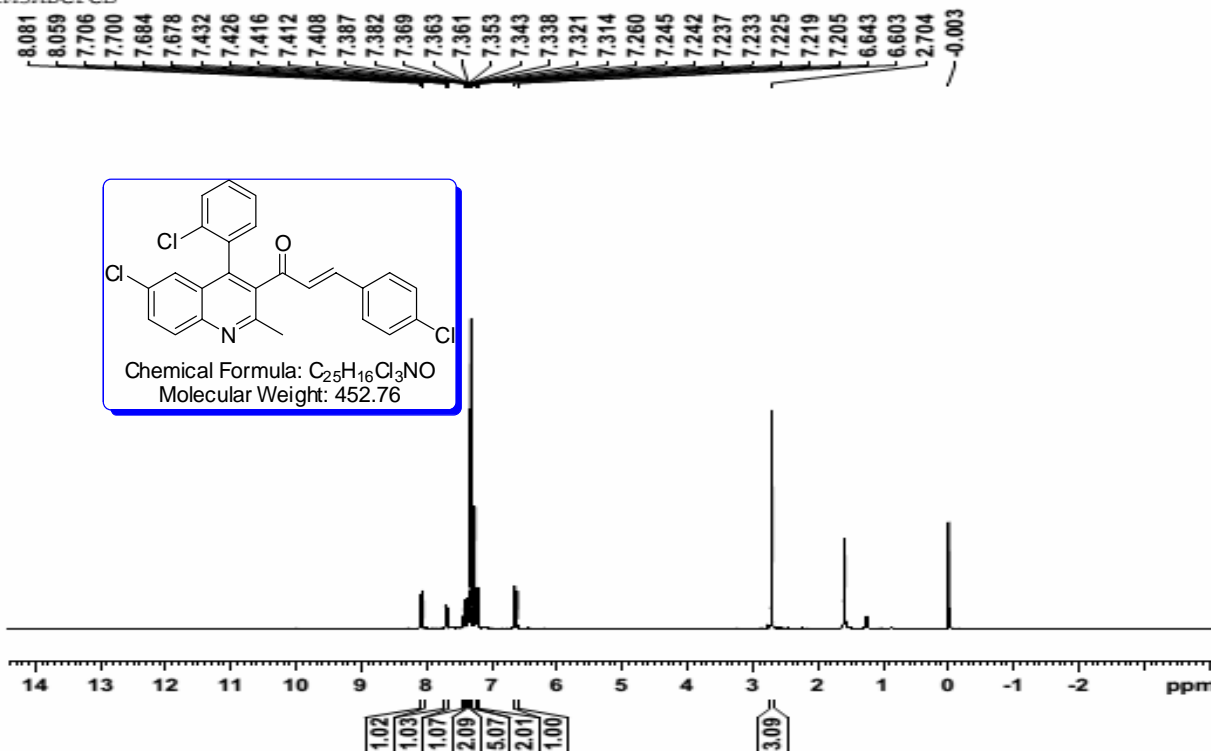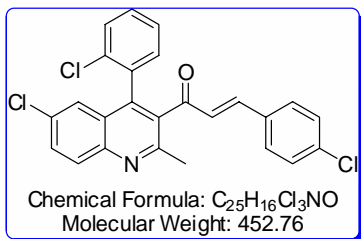

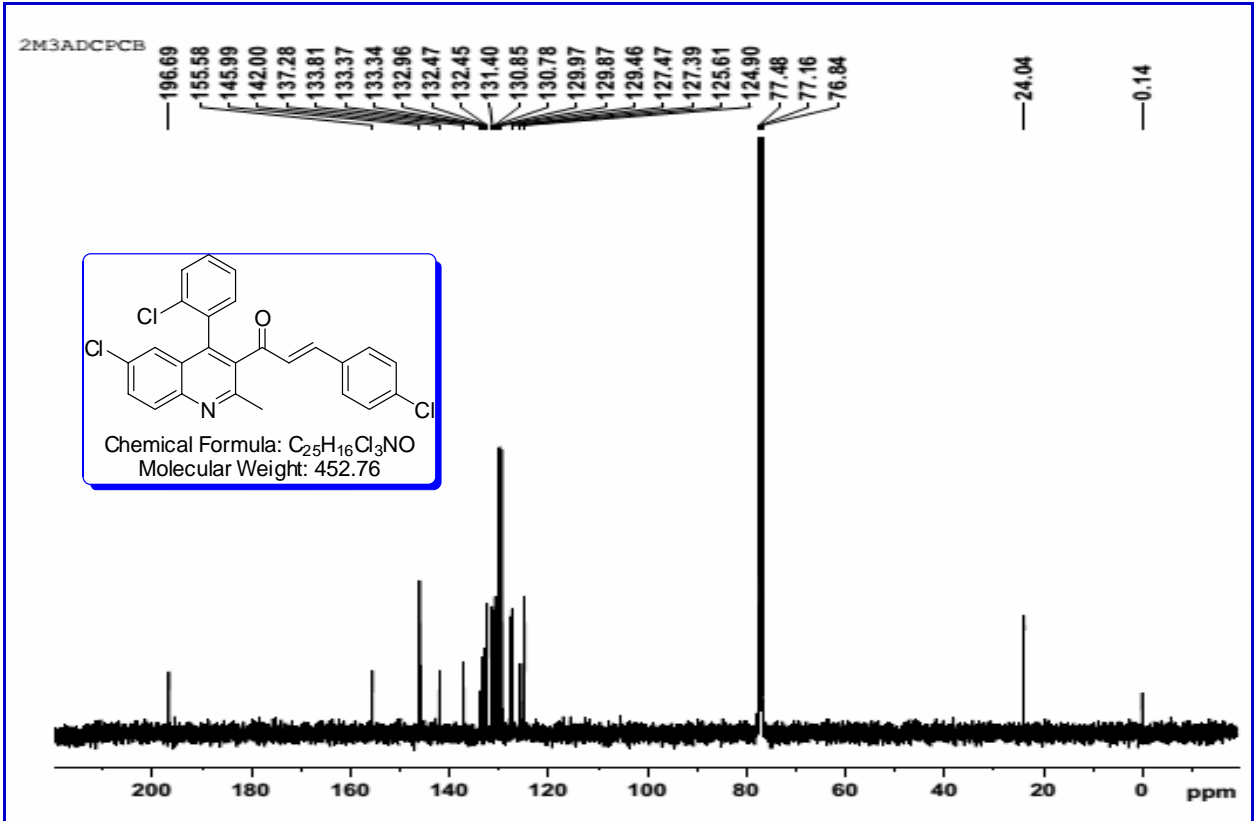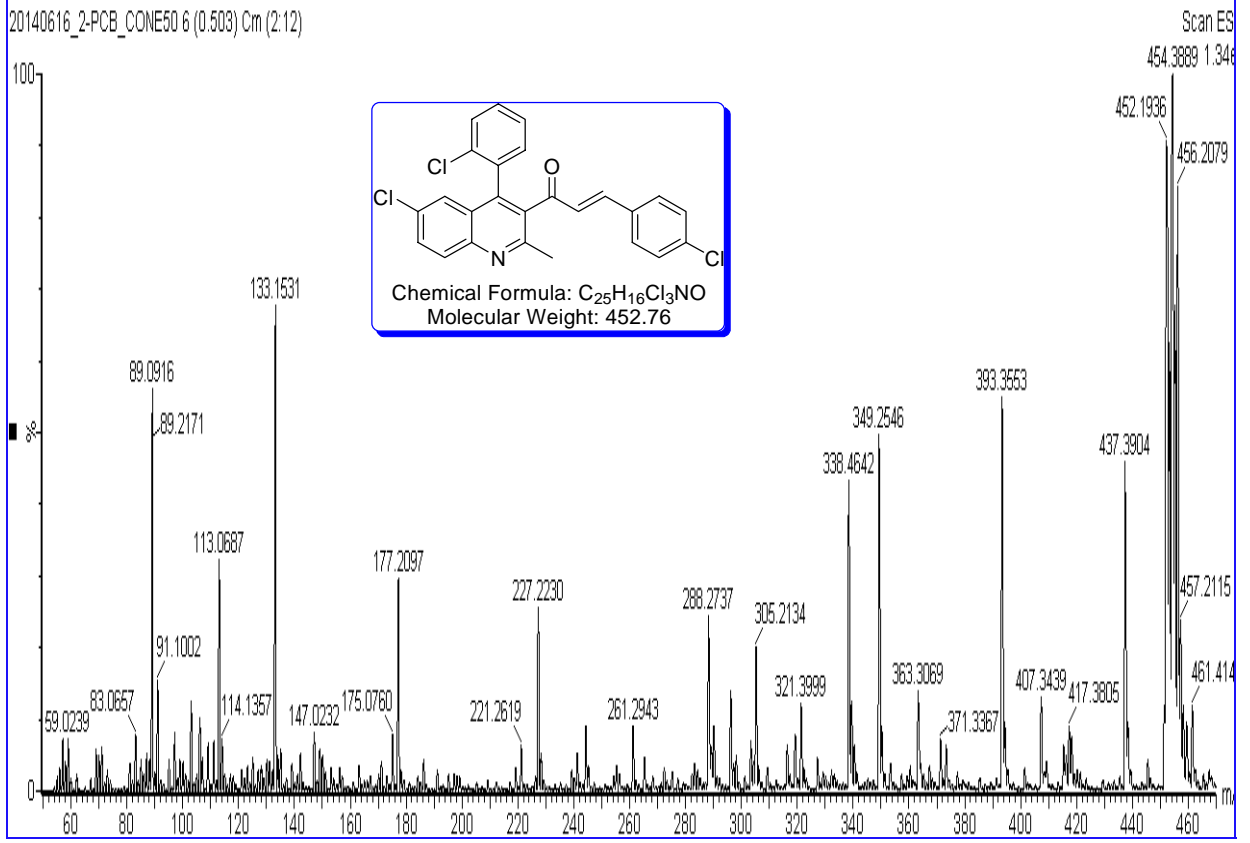

2M3ADC7H1O

8.056  
7.699  
7.694  
7.677  
7.671  
7.458  
7.454  
7.434  
7.420  
7.398  
7.393  
7.380  
7.366  
7.361  
7.356  
7.348  
7.344  
7.322  
7.316  
7.263  
7.248  
7.244  
7.231  
7.226  
7.179  
7.170  
7.044  
7.032  
7.022  
6.490  
6.450  
2.714

-0.000

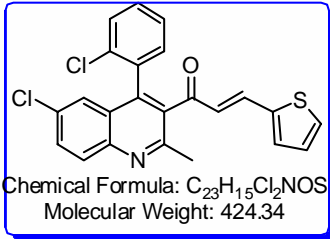

11 10 9 8 7 6 5 4 3 2 1 0 ppm

1.03  
1.02  
5.00  
1.00  
1.03  
1.02  
1.04  
0.94  
2.91

2M3ADC7H1O

196.03  
155.59  
145.80  
141.89  
139.68  
139.22  
133.74  
133.30  
133.23  
132.74  
132.57  
132.21  
131.18  
130.68  
130.59  
130.26  
129.88  
128.51  
127.21  
125.77  
125.55  
124.79  
77.35  
77.03  
76.72  
23.90  
0.02

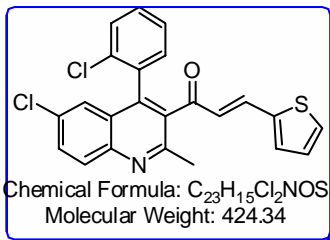

180 160 140 120 100 80 60 40 20 ppm

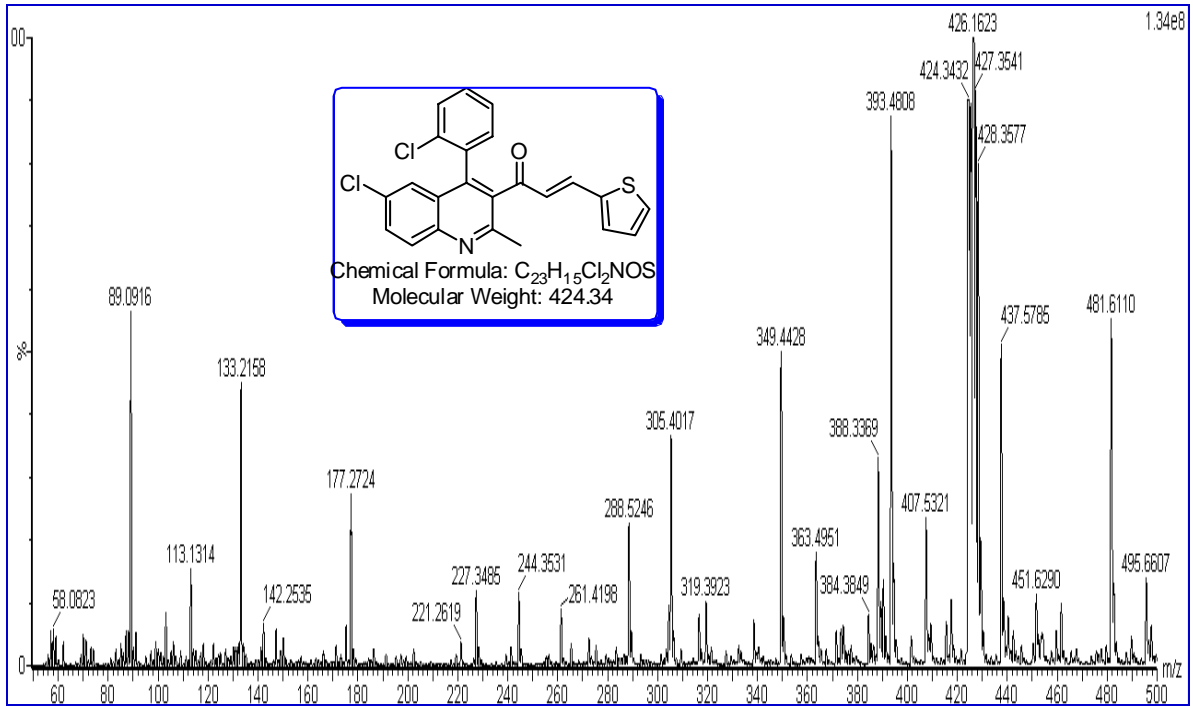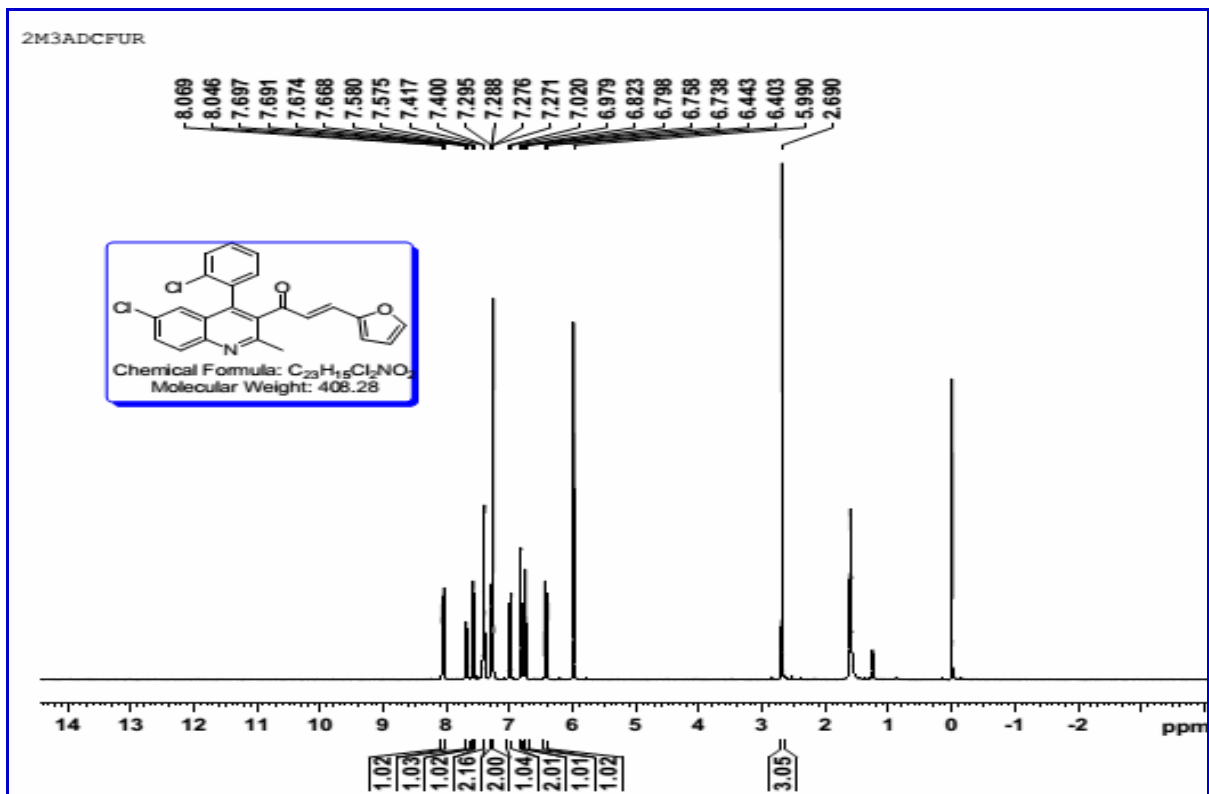

2M3ADCFUR

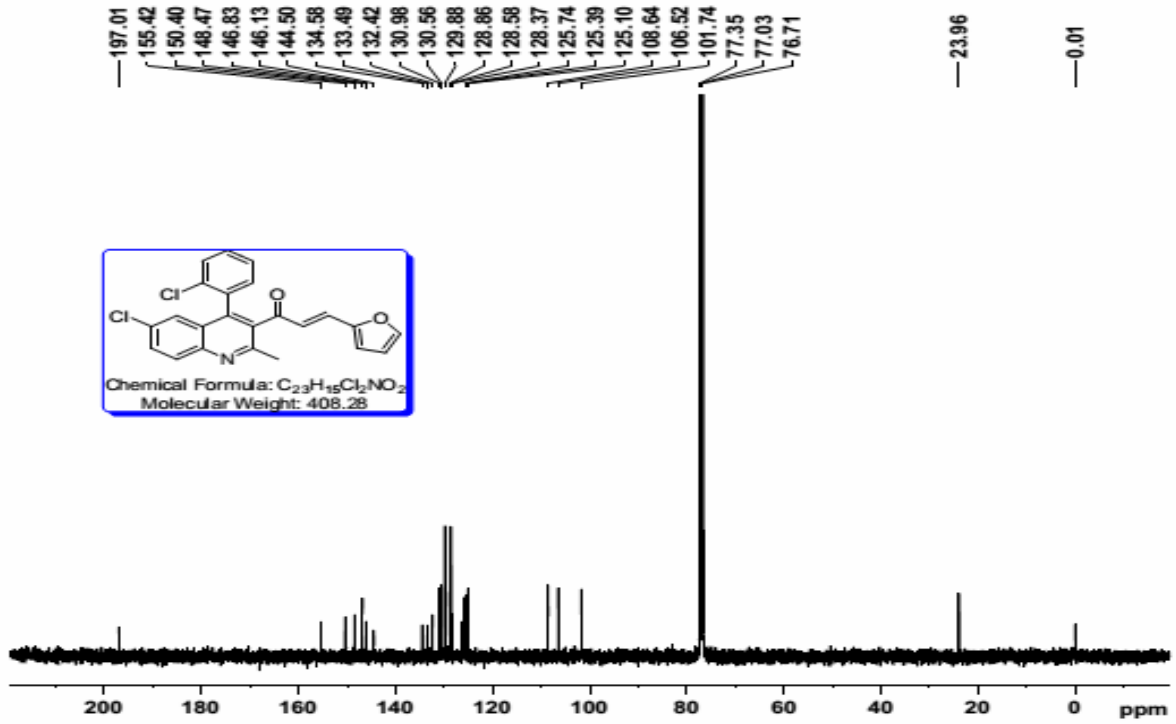

20140616\_2-FUR\_CONE50 9 (0.755) Cm (2.12)

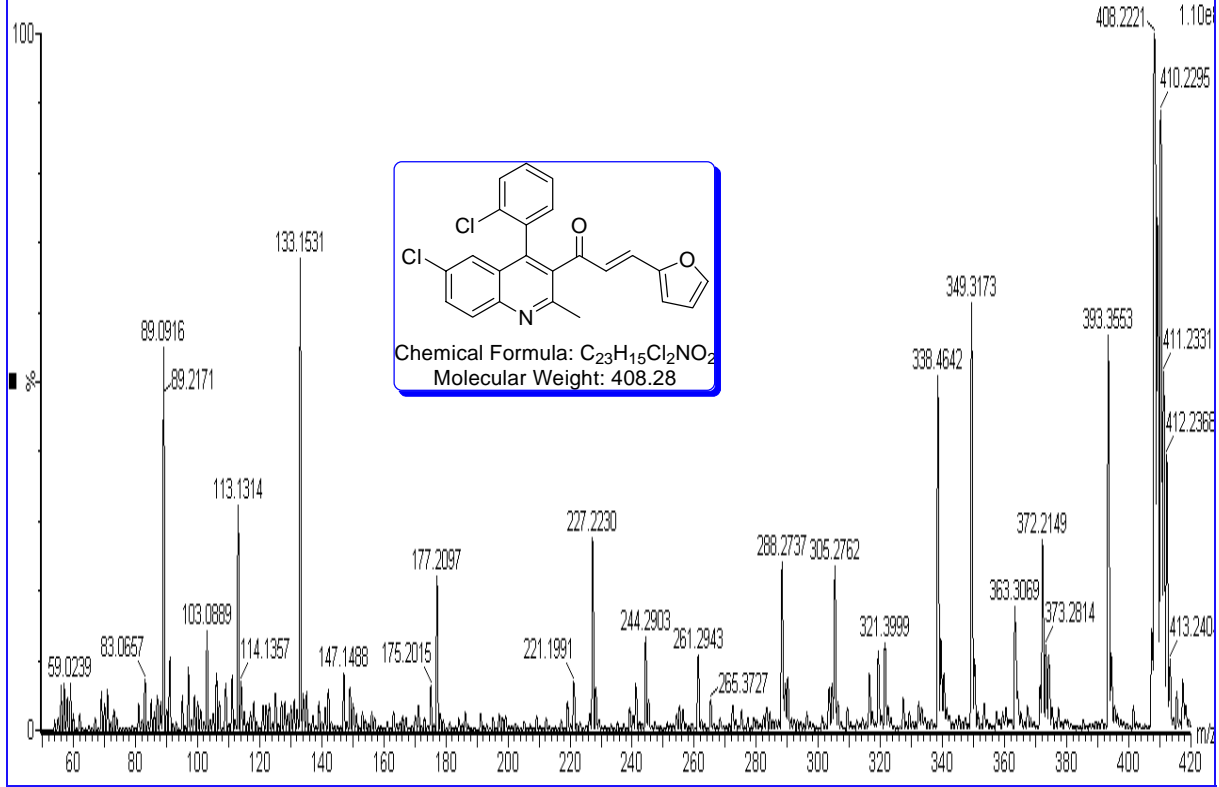



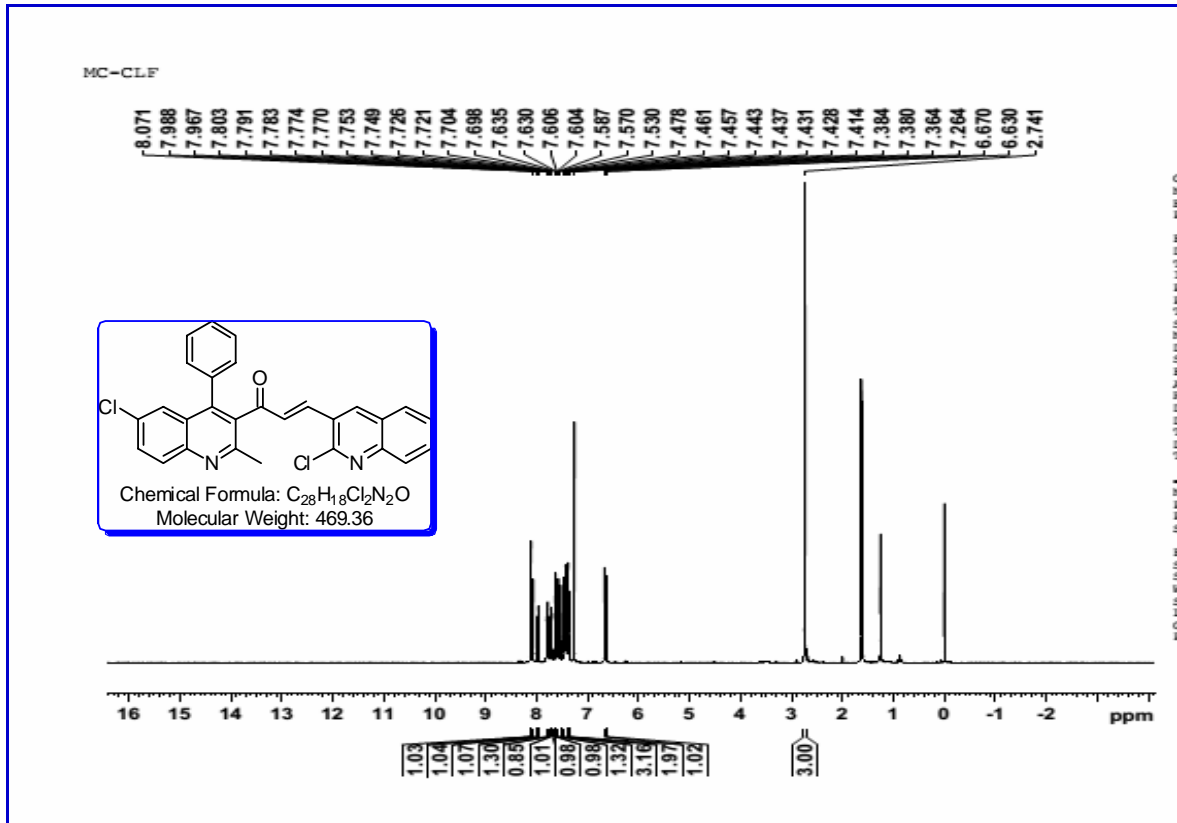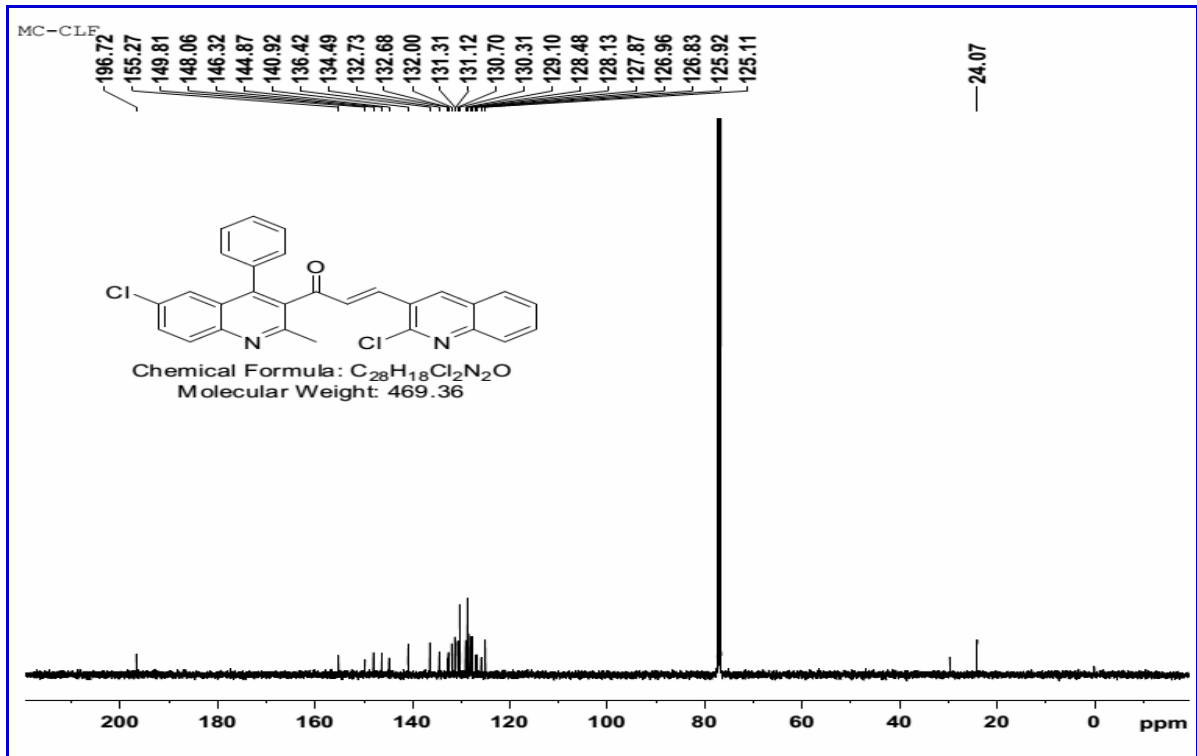

20140616\_1-CLF\_CONE30 6 (0.503) Cm (1:11)

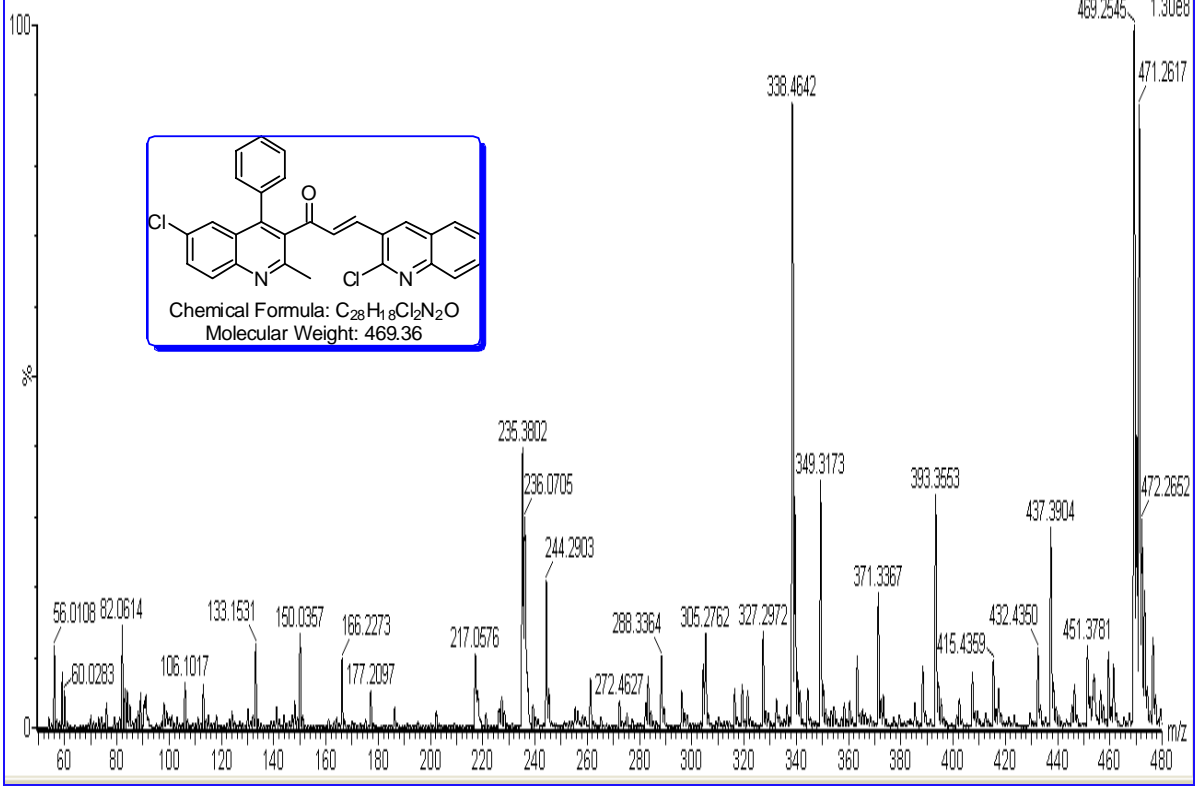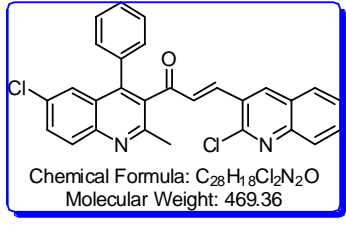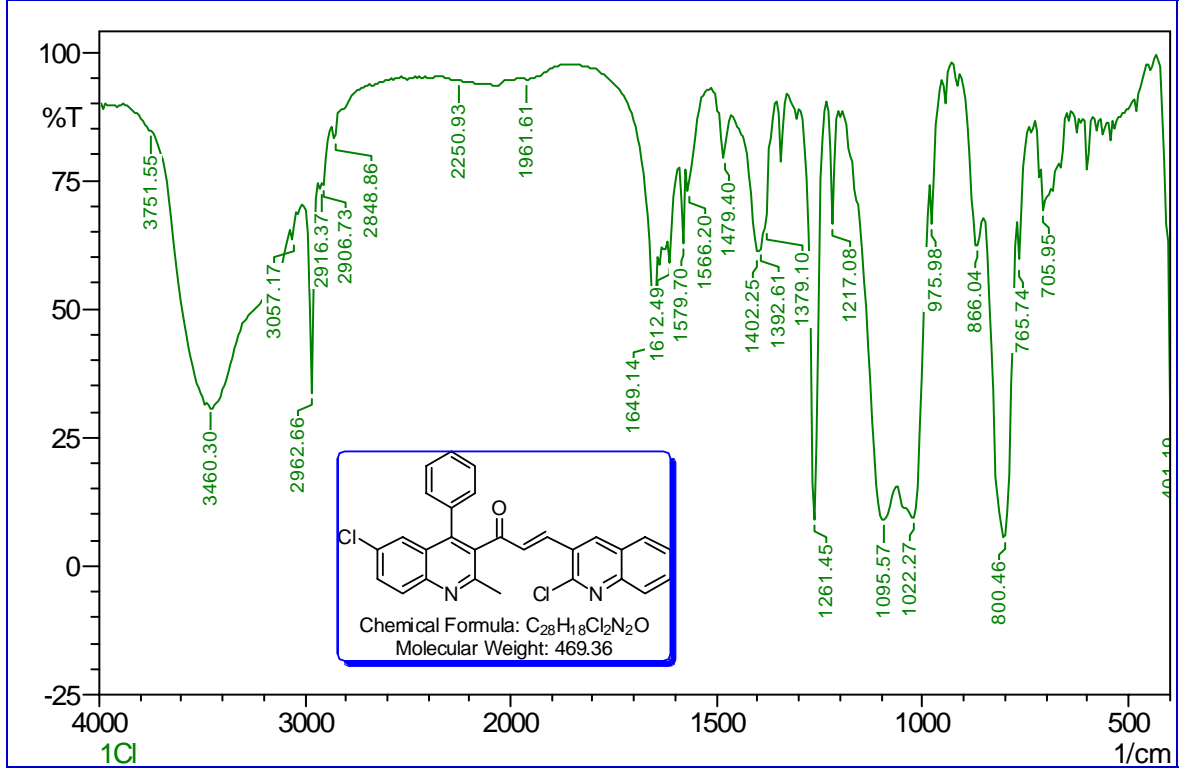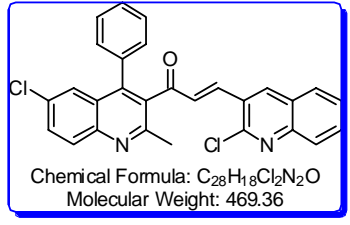

Signature SIF VIT VELLORE  
1PTTQ

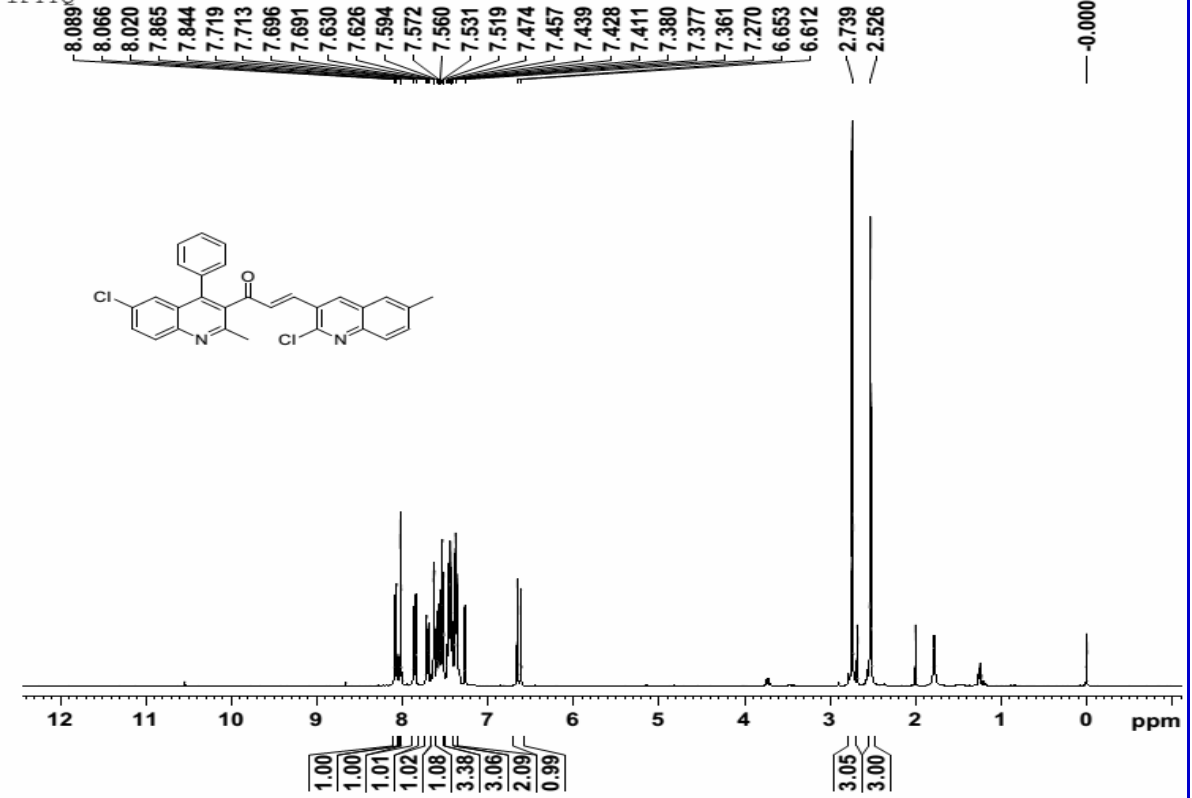

Signature SIF VIT VELLORE  
1PTTQ

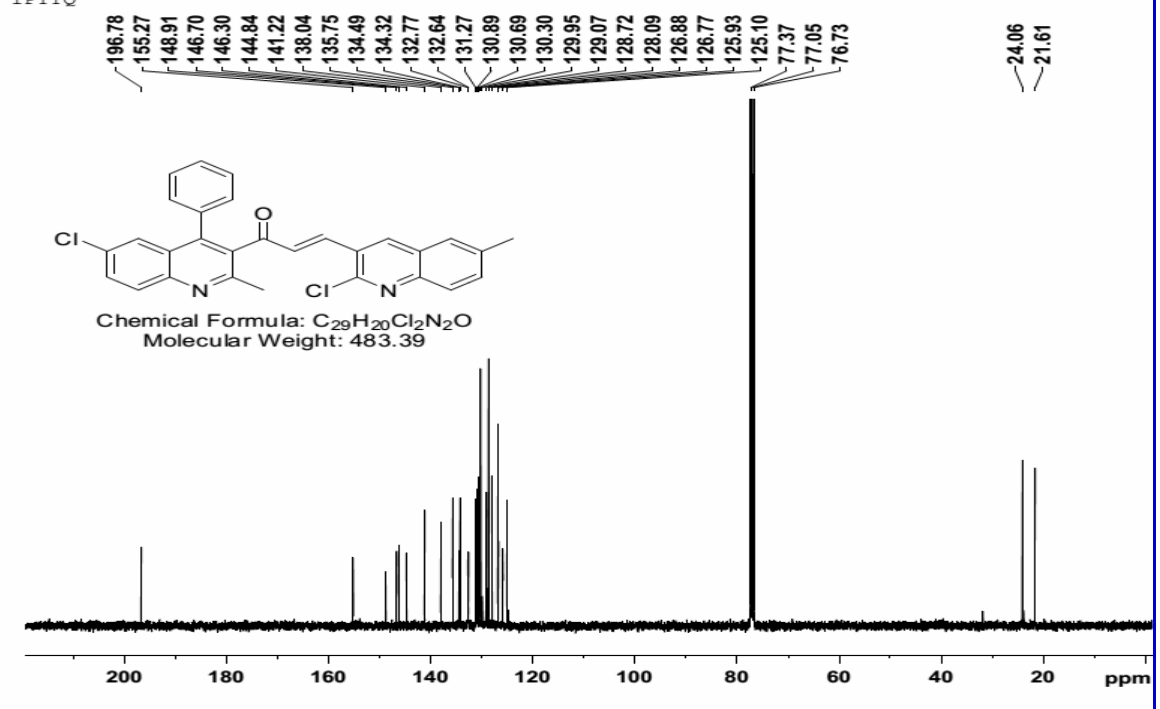

20140616\_1-PTQ\_CDNE40 5 (0.419) Cm (2:12)

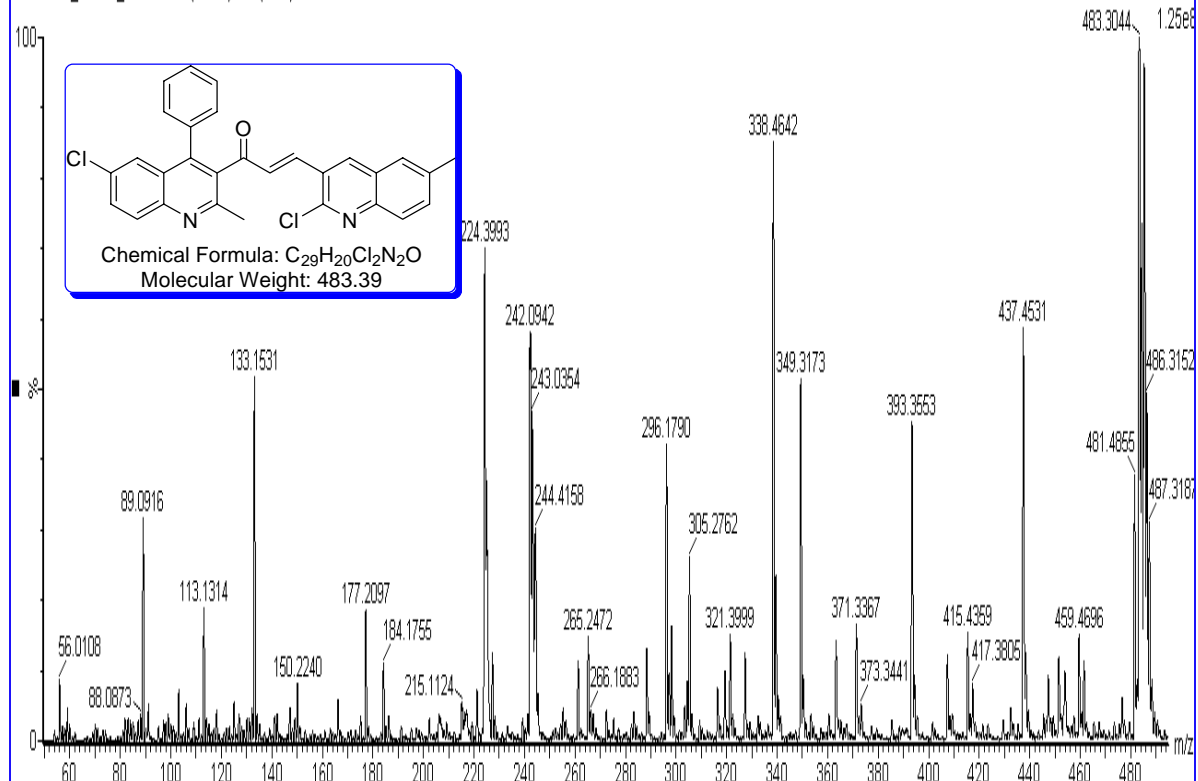

Signature SIF VIT VELLORE  
100TQ

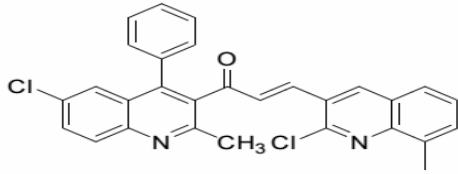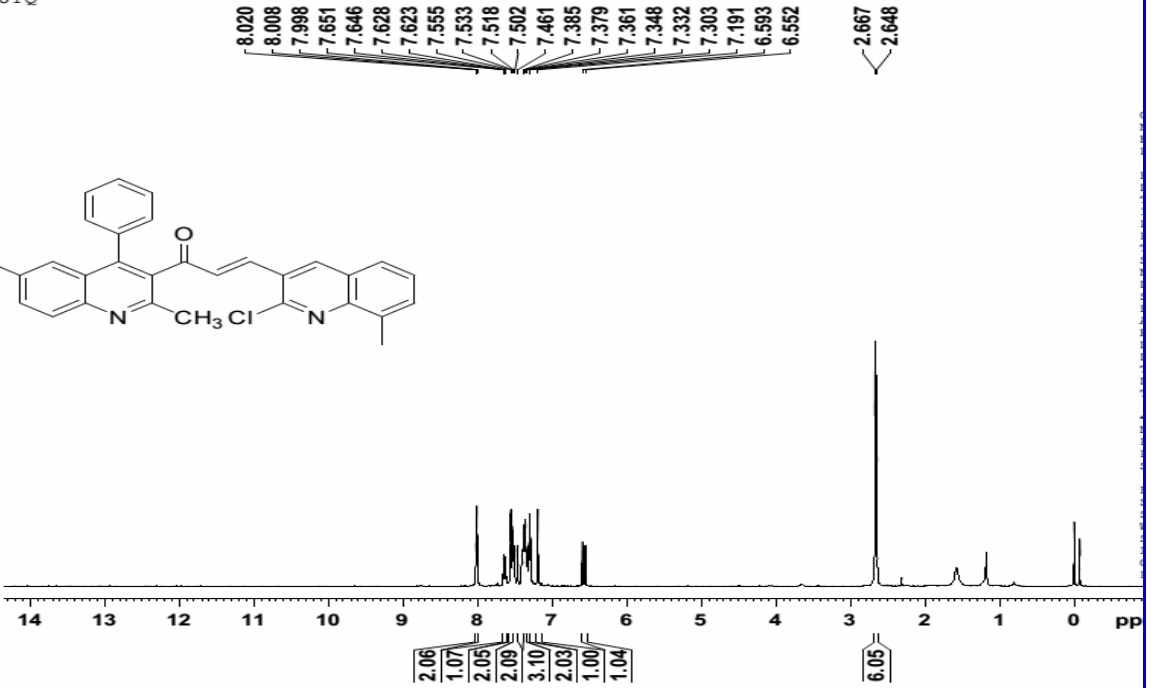

Signature SIF VIT VELLORE  
100TQ

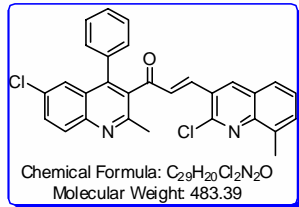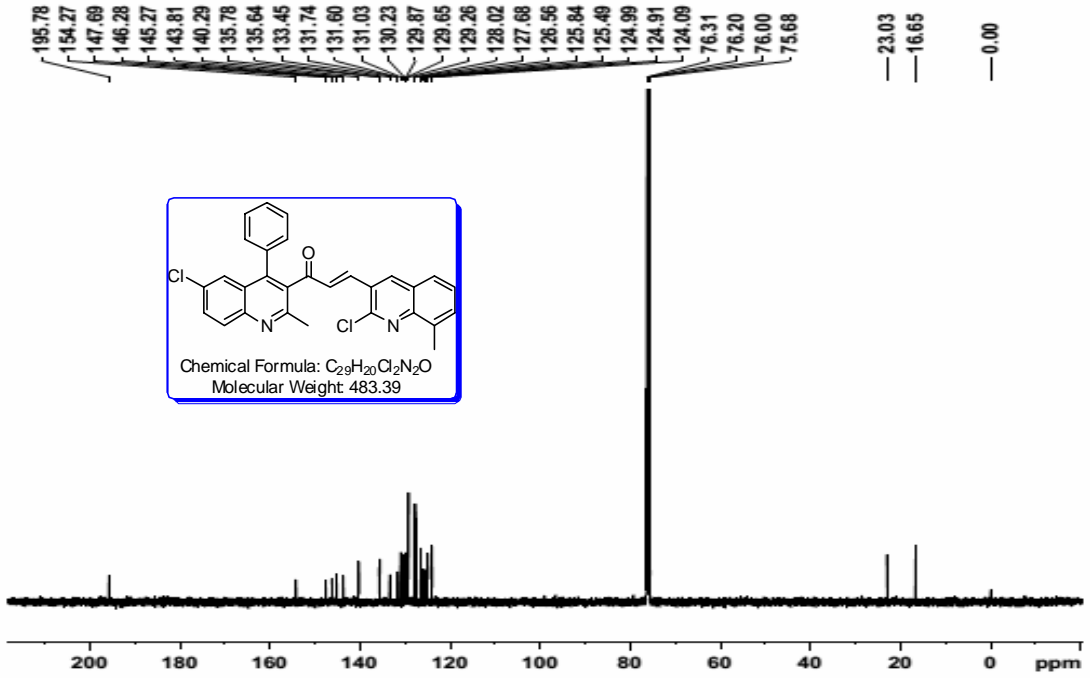

20140616\_1-OTQ\_CONE40.4 (0.335) Cm (2:12)

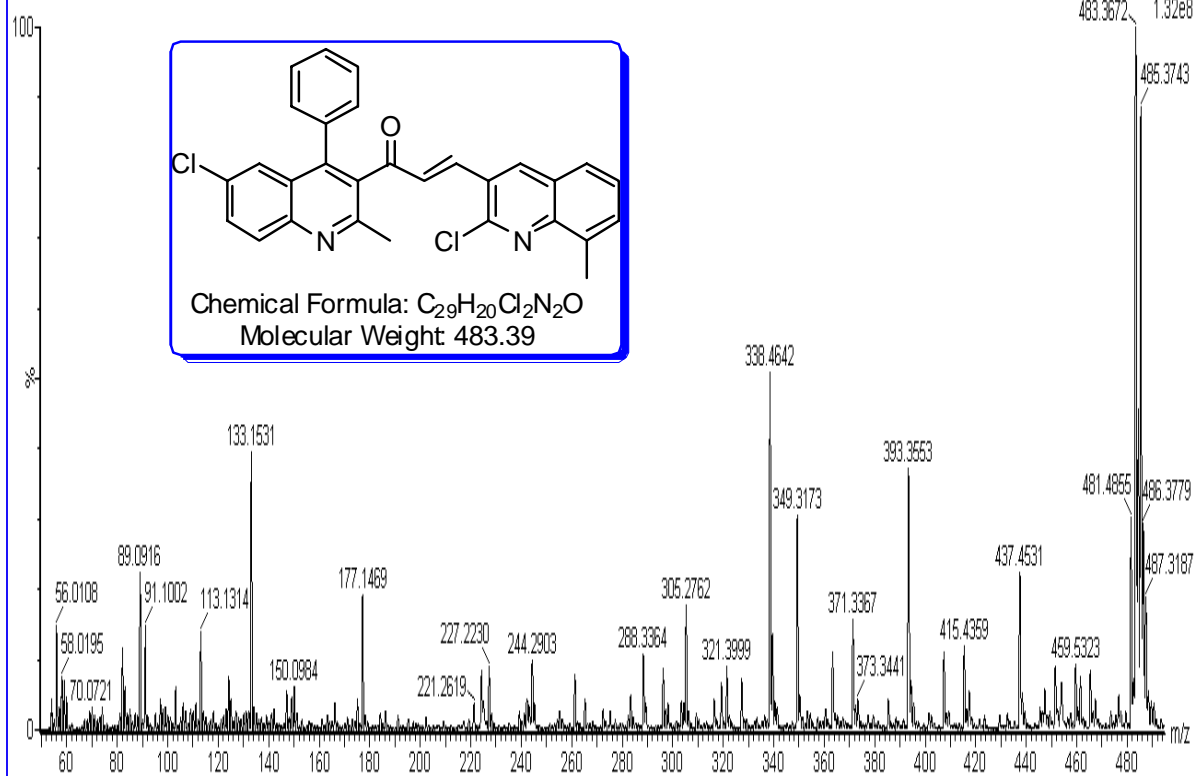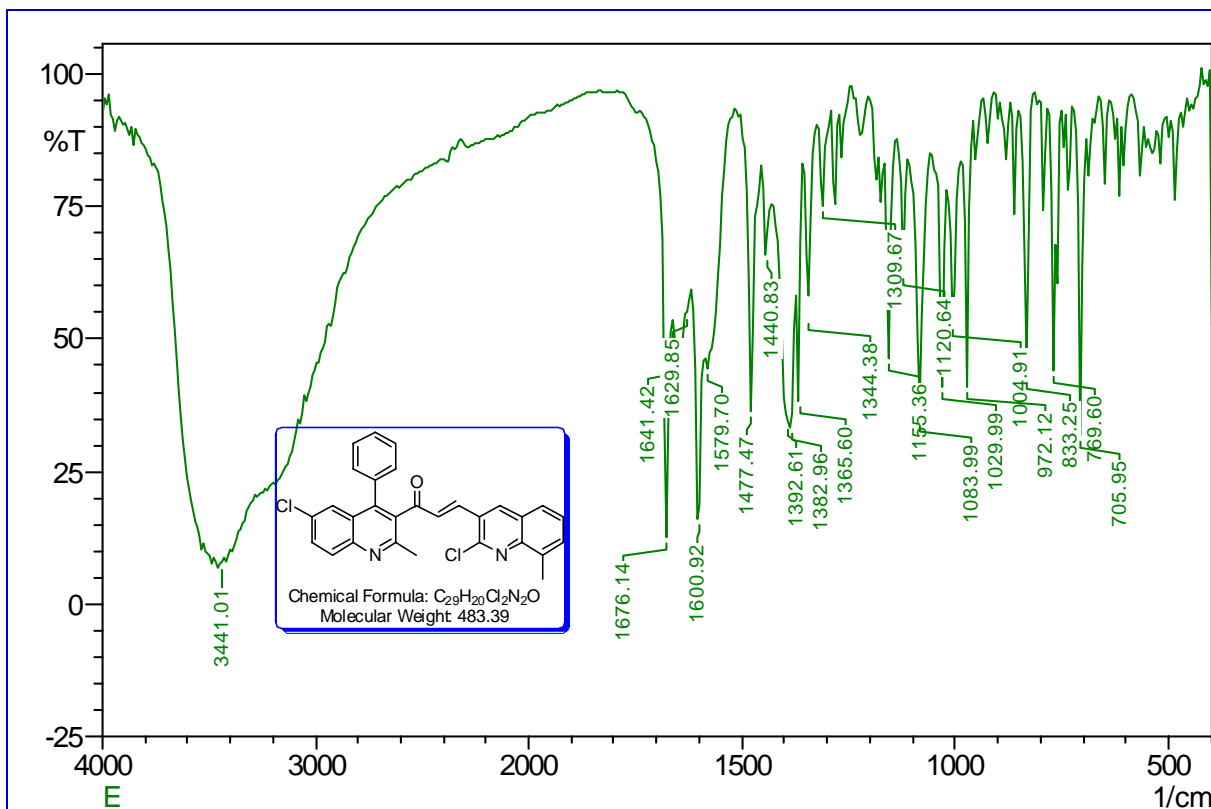

Signature SIF VIT VELLORE  
24NAW-2

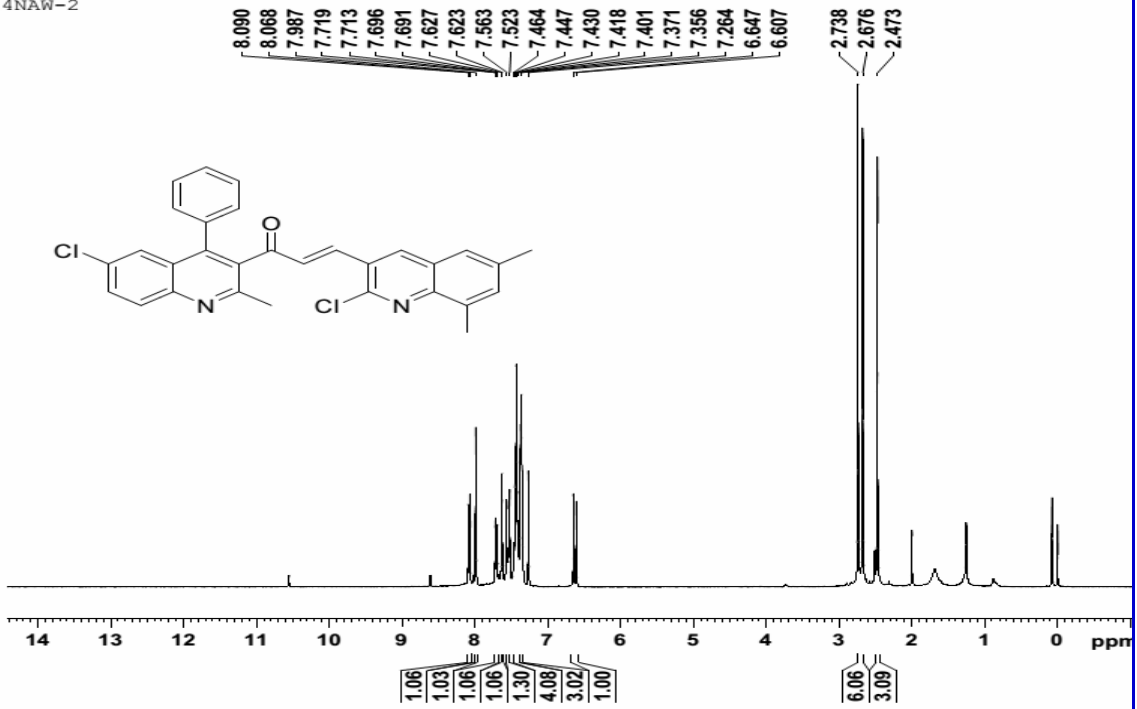

24NAW-2

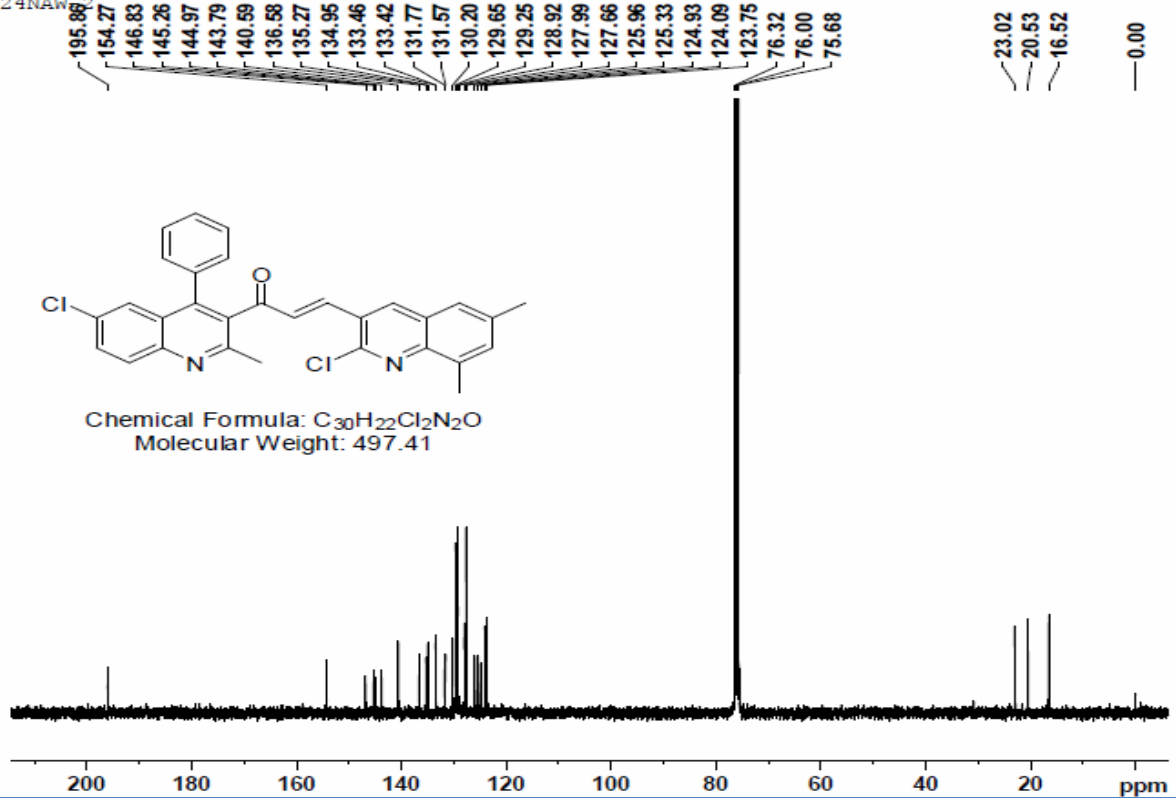

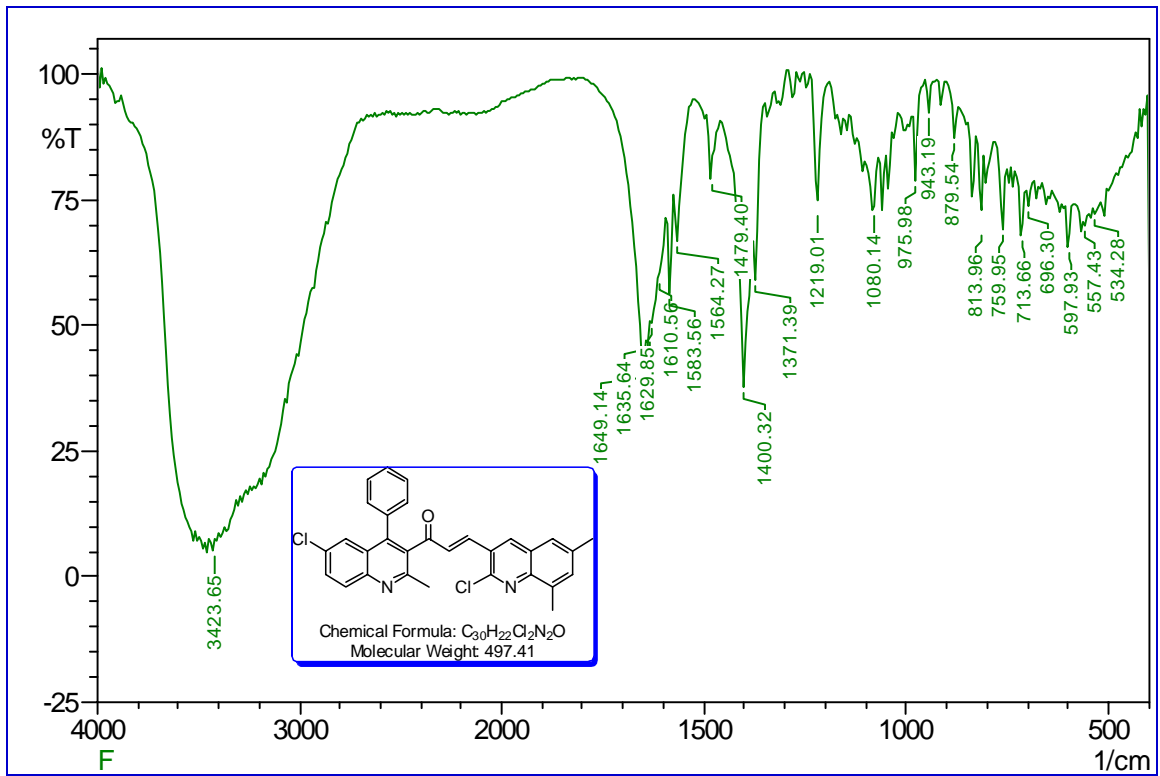



Signature SIF VIT VELLORE  
24NAW-1

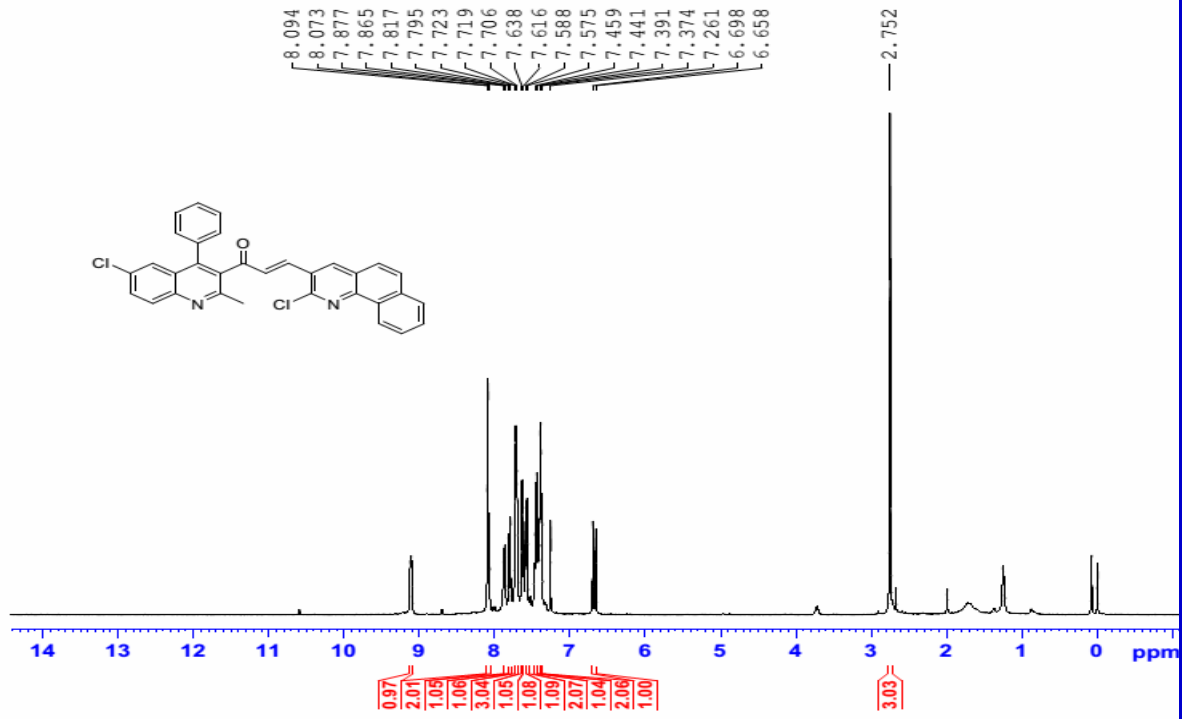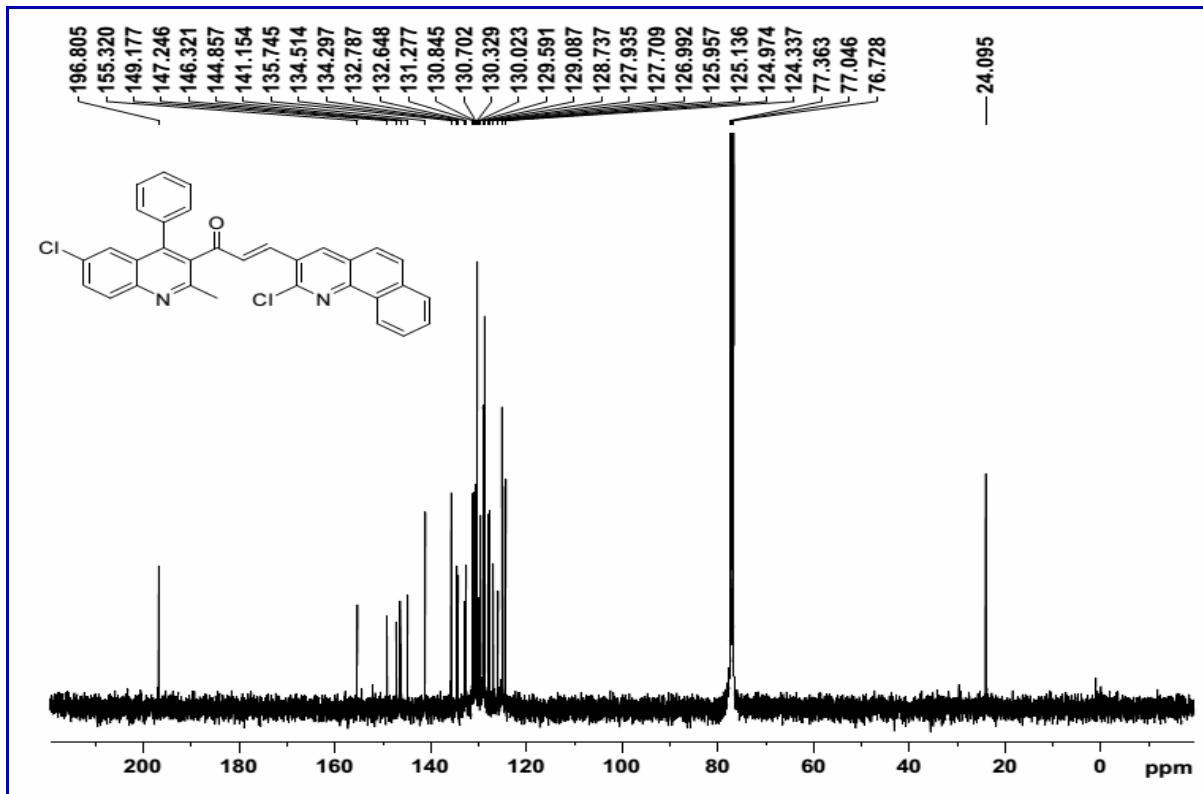

20140616\_1-NAQ\_CONE40 6 (0.503) Cm (2:12)

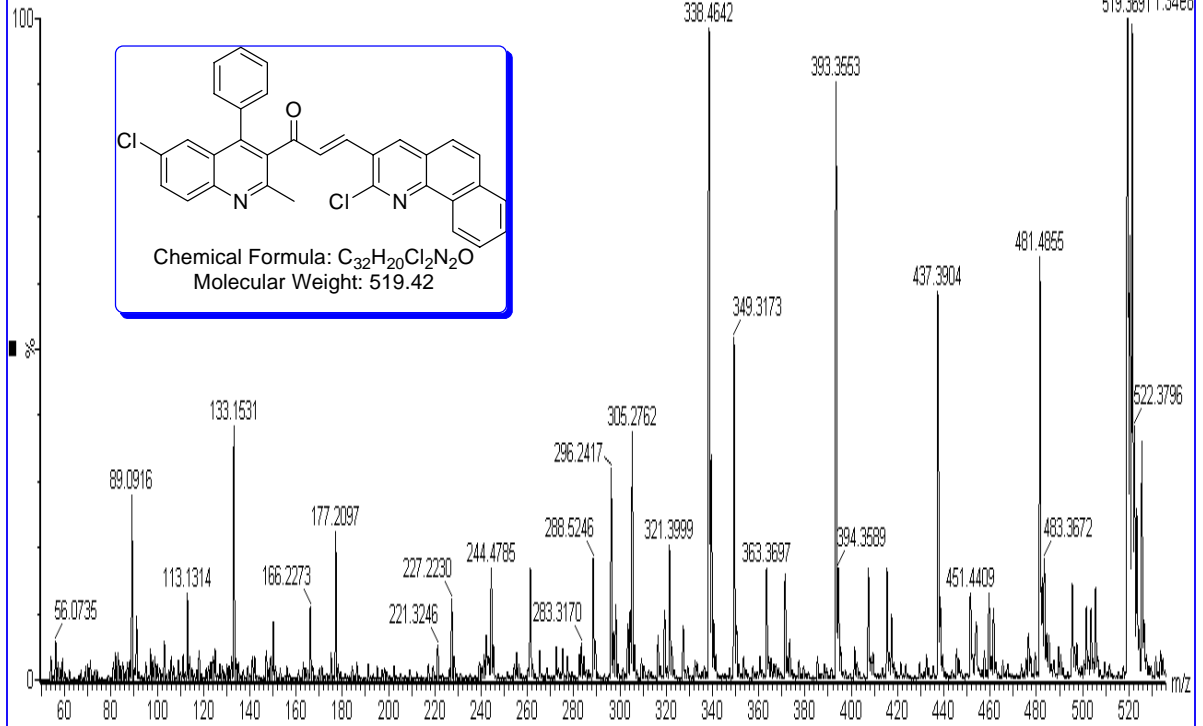

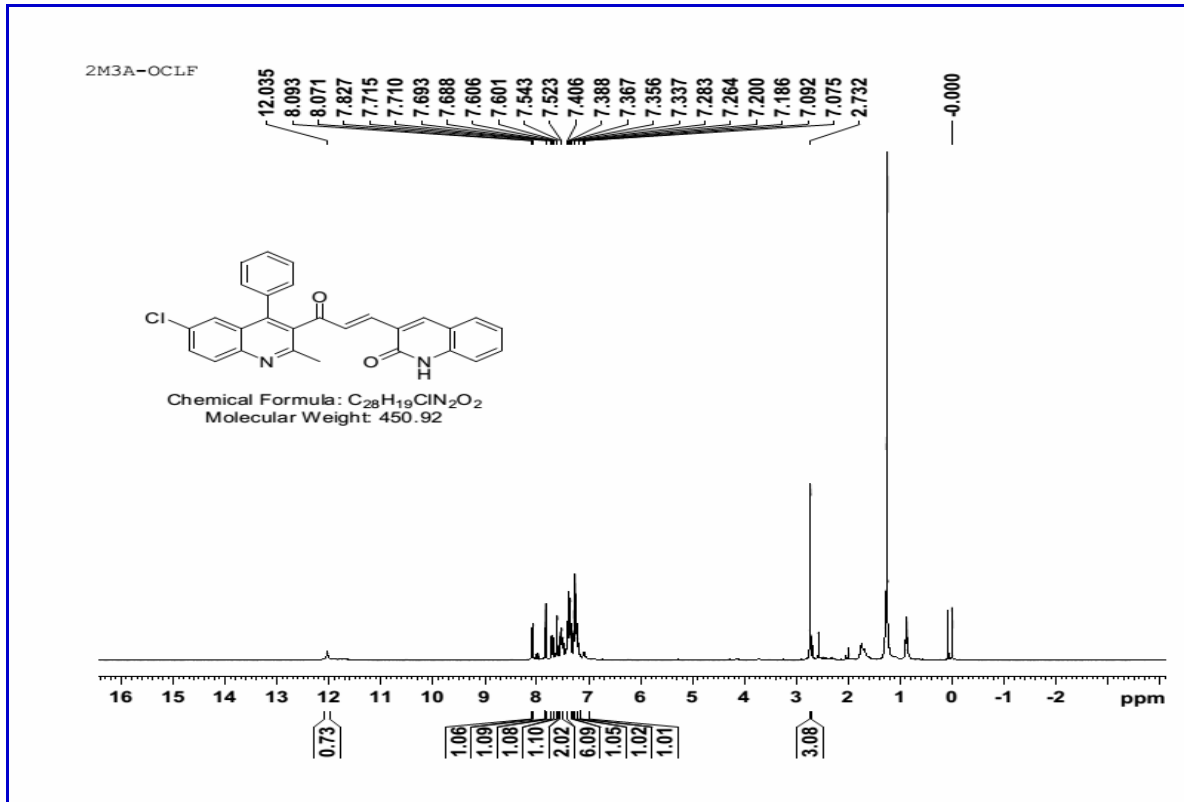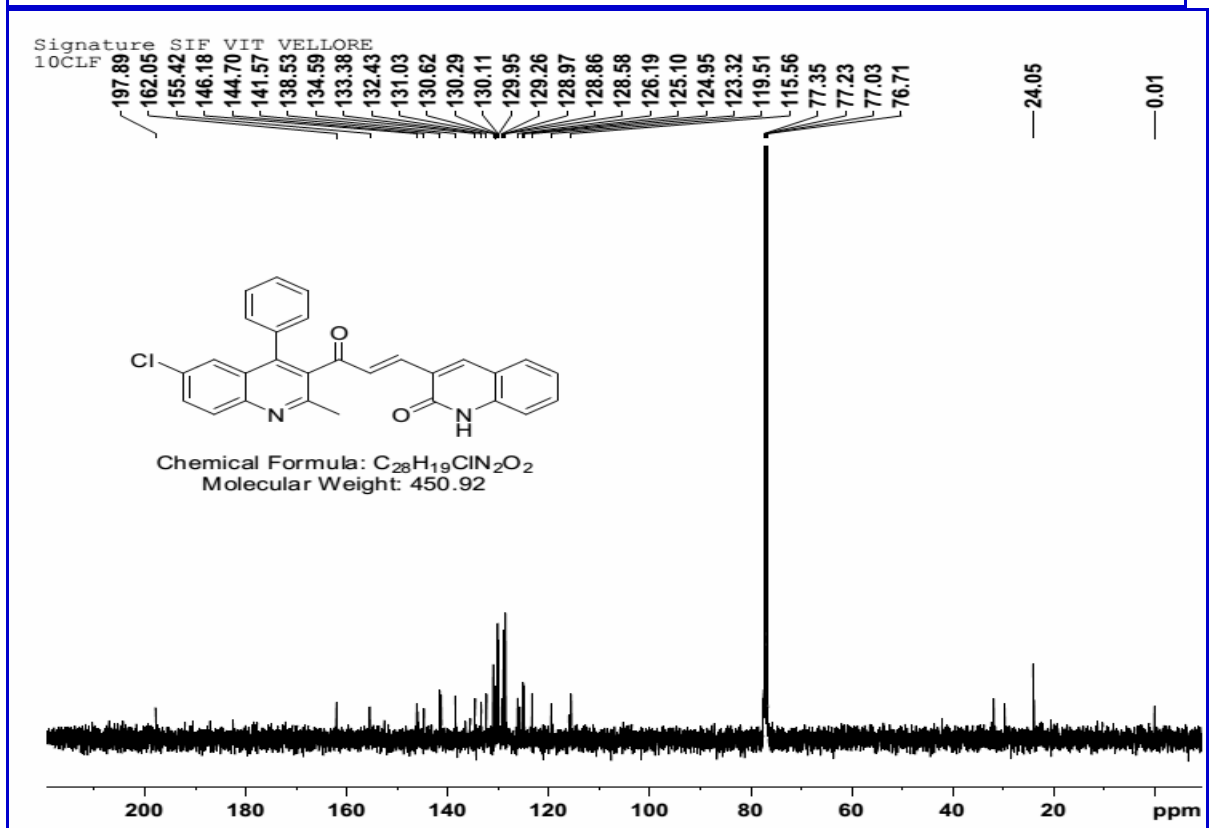

20140616\_1-OCLF\_CONE\_50.8 (0.671) Cm (2:12)

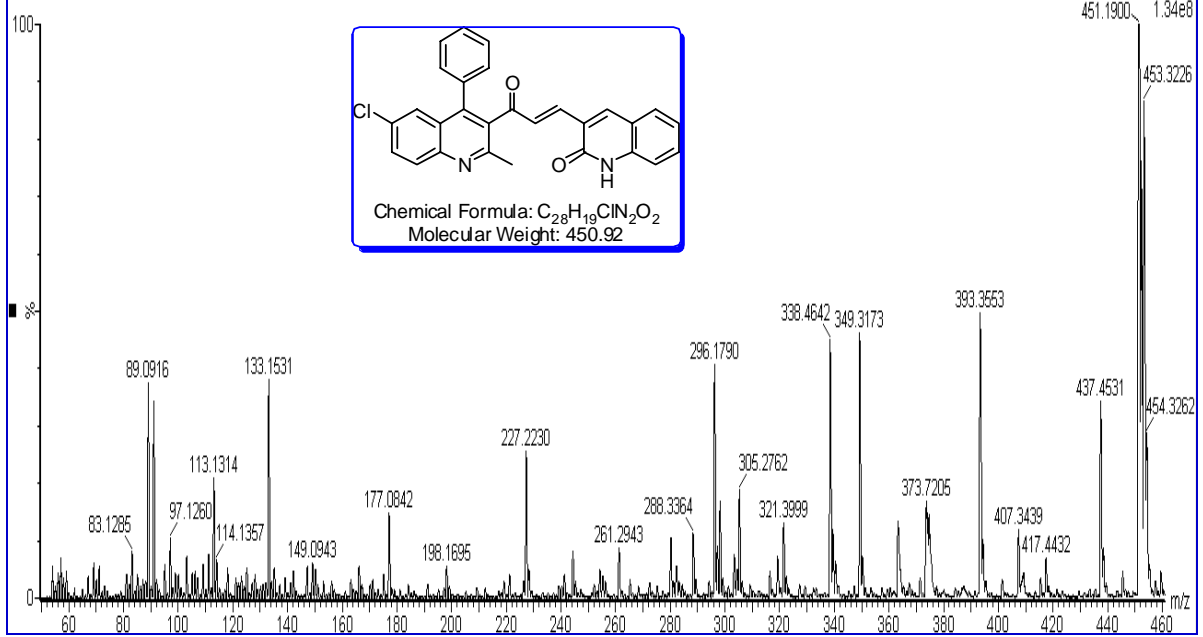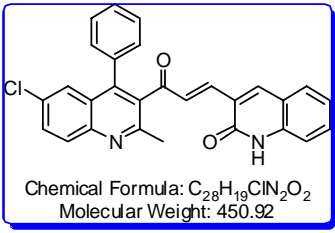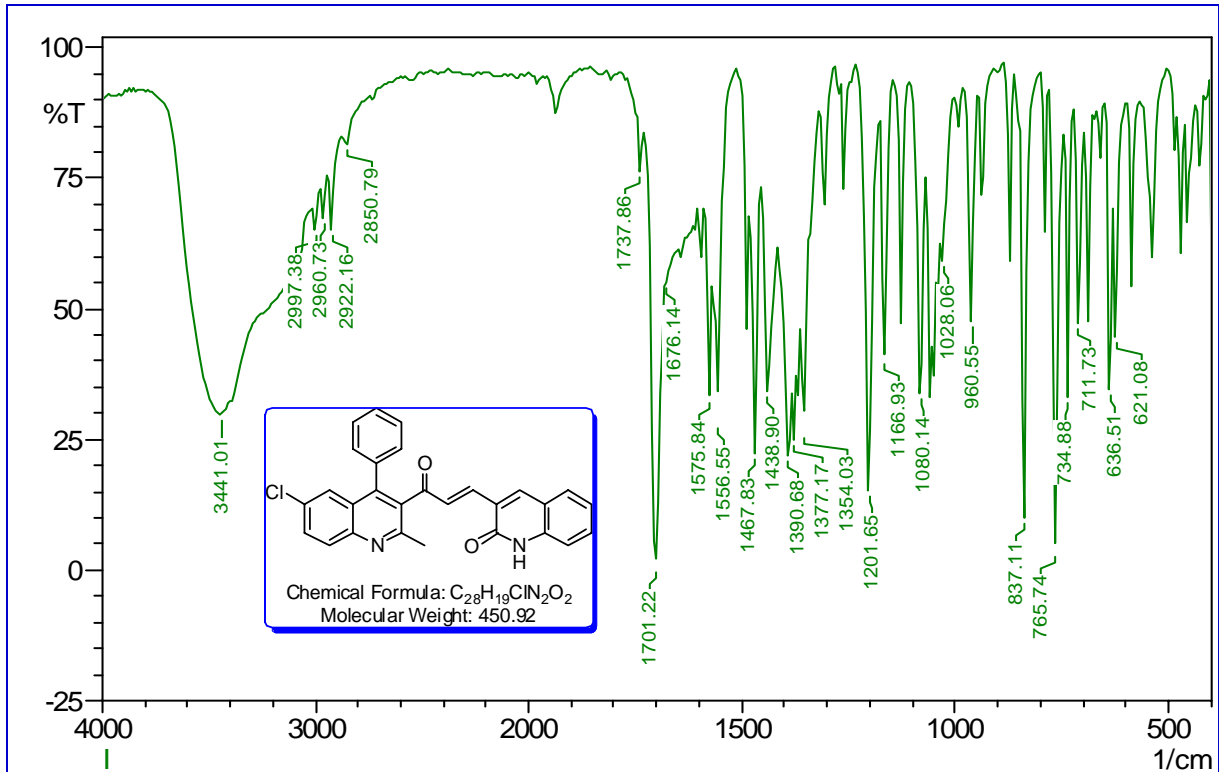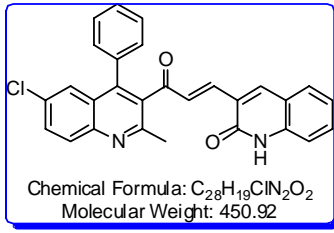

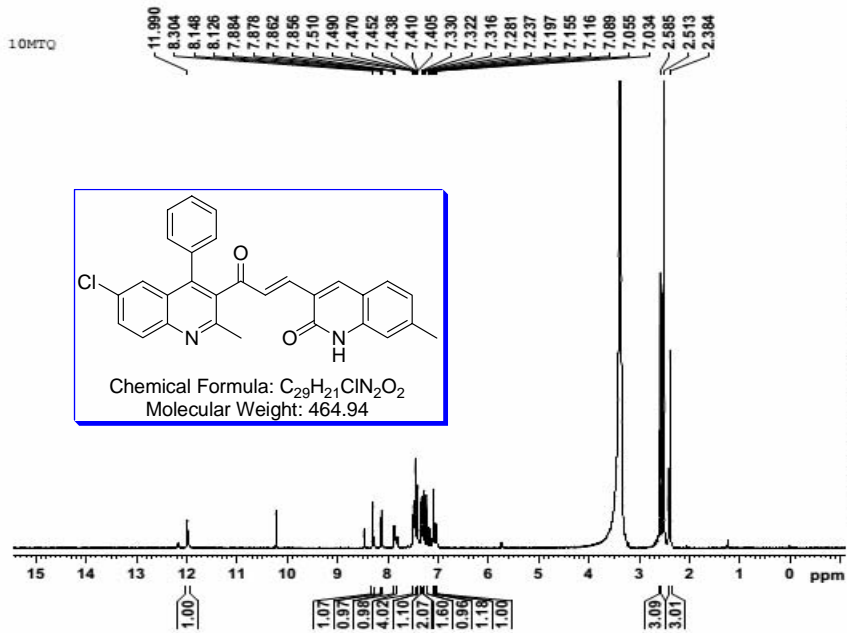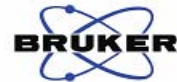

Current Data Parameters  
NAME FNN40614  
EXPNO 37  
PROCNO 1

F2 - Acquisition Parameters  
Date\_ 20140614  
Time 0.36  
INSTRUM spect  
PROBHD 5 mm PABBO BB/  
PULPROG zg30  
TD 65536  
SOLVENT DMSO  
NS 16  
DS 2  
SWH 8223.685 Hz  
FIDRES 0.125483 Hz  
AQ 3.9845889 sec  
RG 127.79  
DM 60.800 usec  
DE 6.50 usec  
TE 295.5 K  
D1 1.00000000 sec  
TD0 1

----- CHANNEL f1 -----  
NUC1  $^{1}H$   
P1 14.25 usec  
PLM1 14.00000000 W  
SFO1 400.2604718 MHz

F2 - Processing parameters  
SI 65536  
SF 400.2580000 MHz  
WDW EM  
SSB 0  
LB 0.30 Hz  
GB 0  
PC 1.00

Signature SIF VIT VELLORE  
10MTQ

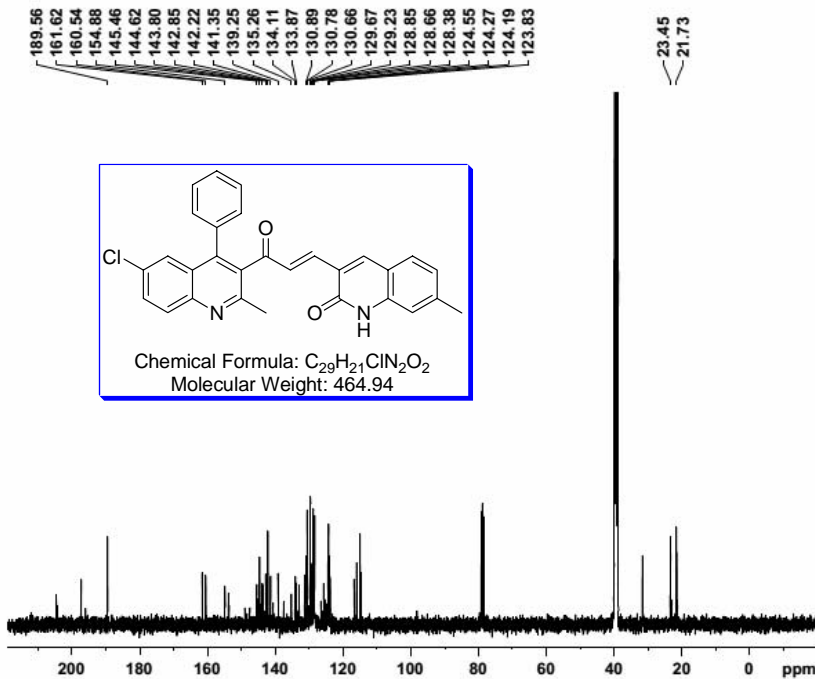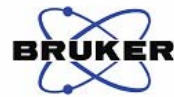

Current Data Parameters  
NAME FNN40614  
EXPNO 40  
PROCNO 1

F2 - Acquisition Parameters  
Date\_ 20140615  
Time 15.06  
INSTRUM spect  
PROBHD 5 mm PABBO BB/  
PULPROG zgpg30  
TD 65536  
SOLVENT DMSO  
NS 1024  
DS 4  
SWH 24038.461 Hz  
FIDRES 0.366798 Hz  
AQ 1.3631488 sec  
RG 143.73  
DM 20.800 usec  
DE 6.50 usec  
TE 296.9 K  
D1 2.00000000 sec  
D11 0.03000000 sec  
TD0 1

===== CHANNEL f1 =====  
NUC1  $^{13}C$   
P1 9.80 usec  
PLM1 58.00000000 W  
SFO1 100.6550182 MHz

===== CHANNEL f2 =====  
CPDPRG2 waltz16  
NUC2  $^1H$   
PCPD2 90.00 usec  
PLM2 14.00000000 W  
PLM12 0.35097000 W  
PLM13 0.28428999 W  
SFO2 400.2596010 MHz

F2 - Processing parameters  
SI 32768  
SF 100.6450043 MHz  
WDW EM  
SSB 0  
LB 1.00 Hz  
GB 0  
PC 1.40

Signature SIF VIT VELLORE  
100TQ

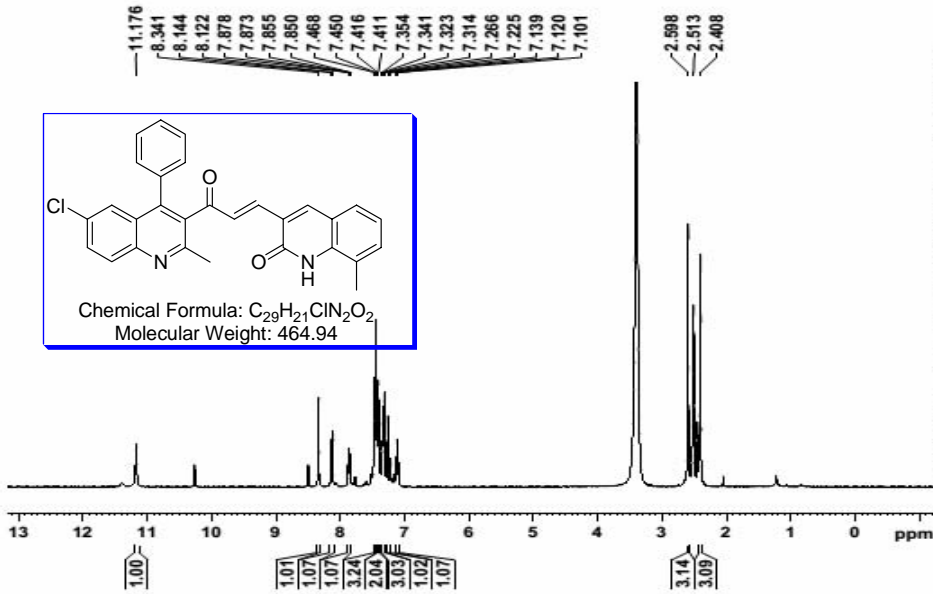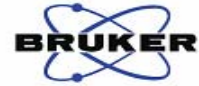

Current Data Parameters  
NAME FNM40614  
EXPNO 43  
PROCNO 1

F2 - Acquisition Parameters  
Date\_ 20140615  
Time 16.24  
INSTRUM spect  
PROBHD 5 mm PABBO BB/  
PULPROG zg30  
TD 65536  
SOLVENT DMSO  
NS 16  
DS 2  
SWH 8223.685 Hz  
FIDRES 0.125483 Hz  
AQ 3.9845889 sec  
RG 88.69  
DW 60.800 usec  
DE 6.50 usec  
TE 296.3 K  
D1 1.0000000 sec  
TDO 1

----- CHANNEL f1 -----  
NUC1 1H  
P1 14.25 usec  
PLW1 14.0000000 W  
SFO1 400.2604718 MHz

F2 - Processing parameters  
SI 65536  
SF 400.2580000 MHz  
WDW EM  
SSB 0  
LB 0.30 Hz  
GB 0  
PC 1.00

1007Q

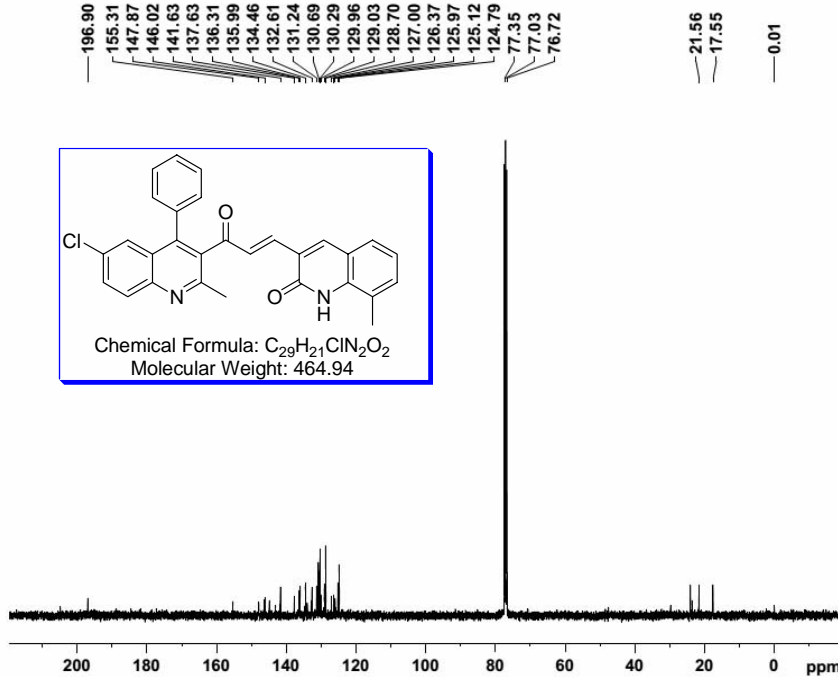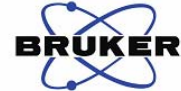

Current Data Parameters  
NAME FNM40614  
EXPNO 28  
PROCNO 1

F2 - Acquisition Parameters  
Date\_ 20140609  
Time 19.34  
INSTRUM spect  
PROBHD 5 mm PABBO BB/  
PULPROG zgpg30  
TD 65536  
SOLVENT CDCl3  
NS 512  
DS 4  
SWH 24038.461 Hz  
FIDRES 0.366798 Hz  
AQ 1.3631488 sec  
RG 127.79  
DW 20.800 usec  
DE 6.50 usec  
TE 297.6 K  
D1 2.0000000 sec  
D11 0.0300000 sec  
TDO 1

----- CHANNEL f1 -----  
NUC1 13C  
P1 9.80 usec  
PLW1 58.0000000 W  
SFO1 100.6550182 MHz

----- CHANNEL f2 -----  
CPDPRG2 waltz16  
NUC2 1H  
PCPD2 90.00 usec  
PLW2 14.0000000 W  
PLW12 0.35097000 W  
PLW13 0.28428999 W  
SFO2 400.2596010 MHz

F2 - Processing parameters  
SI 32768  
SF 100.6449540 MHz  
WDW EM  
SSB 0  
LB 1.00 Hz  
GB 0  
PC 1.40

Signature SIF VIT VELLORE  
124DMQ

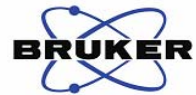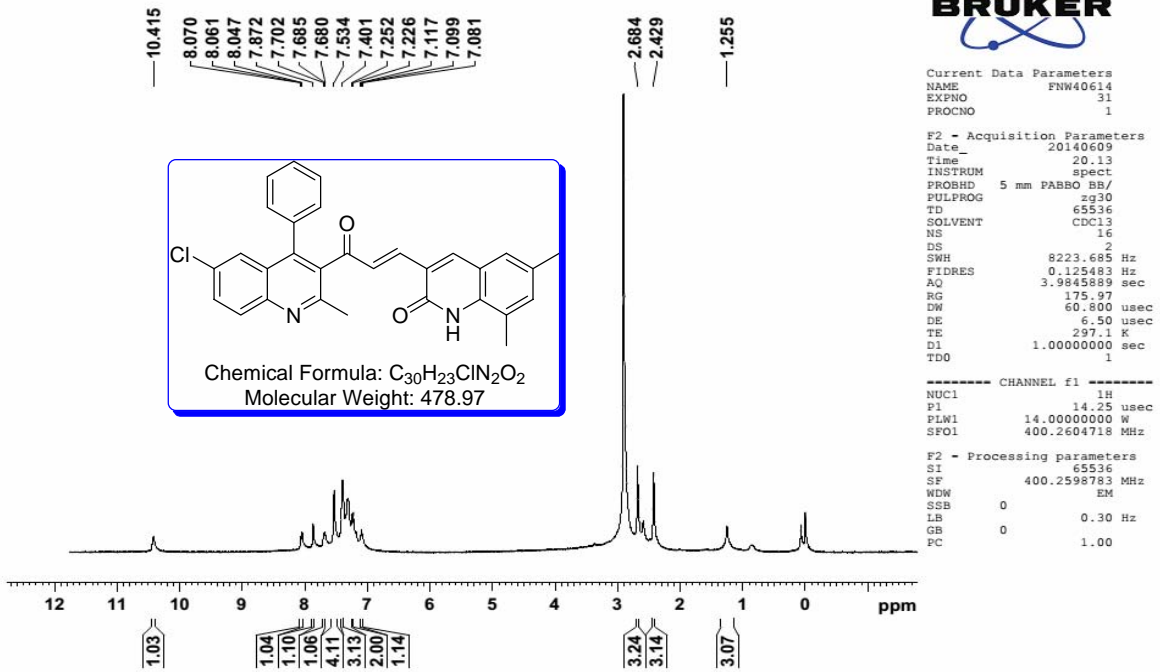

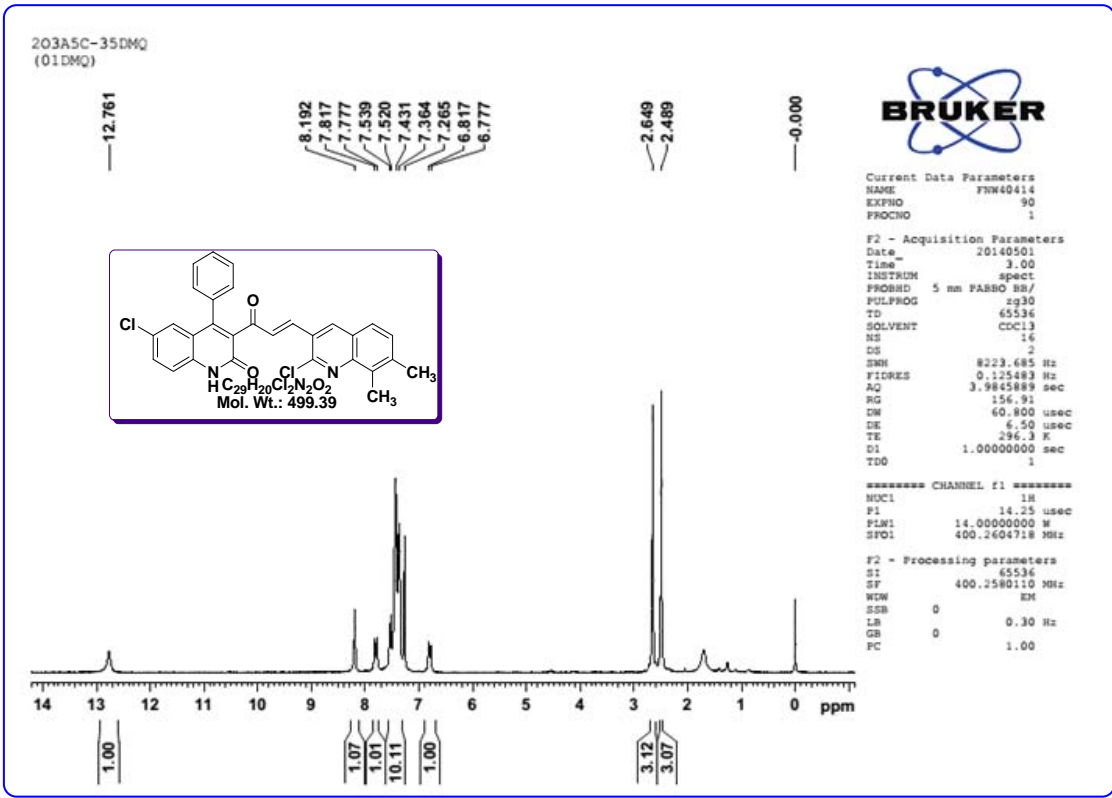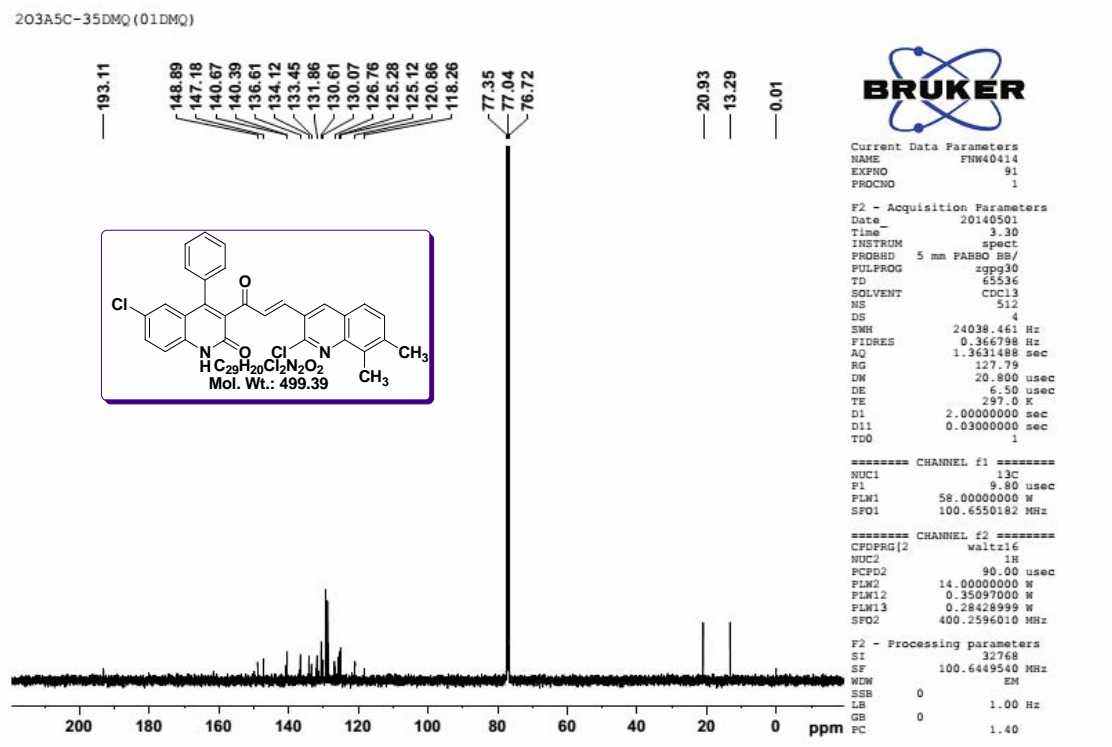

Supplement: c4ra06772j1.pdf [file c4ra06772j1.pdf]
